# Supplementary material for: Comparison of frozen-thawed embryo transfer strategies for the treatment of infertility in young women: a retrospective study
Source: PeerJ. 2022 Nov 25;10:e14424. doi: 10.7717/peerj.14424 (PMC9703987; doi:10.7717/peerj.14424)
Supplement: Supplemental Information 1 [file peerj-10-14424-s001.xlsx]

## Sheet: high-quality single(A)
ID	Infertility duration	BMI	Infertility type	Cause of infertility	Transplant cycle	LH	FSH	PRL	P	E2	En	Age	the number of transferred blastocysts	blastocyst scoring	pregnancy outcomes	Neonatal birth age	Neonatal birth weight	Neonatal sex ratio	Special case
33422	2	22.58	Secondary	Both	1	10.25	4.58	8.25	0.47	25.16	8.8	32.3	1	4BB;	Live birth 1	36	2300	Female	Preterm birth
37193	4	19.98	Primary	Male	1	3.16	5.36	10.33	0.53	37.03	8	30.4	1	4BB;	Live birth 2	37	2350/2550	Male/Male
29504	8	17.53	Secondary	Female	1	5.48	6.44	9.85	0.71	44.58	8.9	32.4	1	4BA;	Live birth 1	37	3250	Female
33861	4	26.64	Secondary	Male	1	1.79	4.69	6.84	0.32	45.1	8.3	29.7	1	4BB;	Live birth 1	38	3600	Male
39357	4	23.92	Primary	Unexplained	1	5.91	6.52	9.31	0.45	47.82	11	30.1	1	4BB;	Live birth 1	38	3500	Male
33533	1	20.96	Secondary	Female	1	3.53	8.04	9.66	0.34	72.64	7.8	34.2	1	4BB;	Live birth 1	38	3200	Male
36541	3	25.53	Secondary	Male	1	6.25	4.71	15.26	0.45	21.15	7	22.3	1	4BB;	Live birth 1	39	3700	Male
36137	3	18.22	Primary	PCOS(Female)	1	7.88	8.38	17.16	0.49	33.1	8.3	27.3	1	4BB;	Live birth 1	39	3504	Female
37678	1	27.89	Secondary	Female	1	4.45	5.93	11.84	0.56	24.15	13	28.2	1	4BA;	Live birth 1	39	3400	Female
38004	2	19.98	Primary	Both	1	8.45	9.82	20.14	0.23	51.06	9	28.3	1	4BA;	Live birth 1	39	3350	Female
31883	5	20.44	Primary	PCOS(Female)	1	8.46	5.64	14.14	0.43	34.22	9	31.3	1	4AB;	Live birth 1	39	3250	Male
36856	5	21.48	Secondary	Unexplained	2	6.07	8.46	9.77	0.26	31.64	9	29.8	1	4BB;	Live birth 1	39	3050	Female
33073	3	22.21	Primary	PCOS(Female)	1	10.36	6.04	7.16	0.24	31.85	11	28.3	1	4BA;	Live birth 1	39	3000	Male
32540	3	20.13	Secondary	Both	1	13.74	5.4	8.61	0.21	36.24	10.8	34.2	1	4BA;	Live birth 1	39	2550	Female
28277	1	21.16	Secondary	Female	2	4.88	6.61	8.48	0.38	38.77	9	27.1	1	4BB;	Live birth 1	40	4050	Male
34079	1	21.48	Secondary	Female	1	3.99	8.74	8.8	0.21	35.58	8.4	30.6	1	4BA;	Live birth 1	40	4000	Female
32194	2	26.04	Primary	PCOS(Female)	1	4.54	5.98	7.83	0.67	36.95	9.7	30.4	1	4BB;	Live birth 1	40	3940	Male
31109	2	16.41	Primary	Female	2	3.64	8.31	23.1	0.93	47.92	16	27	1	4BA;	Live birth 1	40	3700	Male
28530	6	28.13	Primary	PCOS(Female)	2	8.81	5.6	8.28	0.62	35.03	8	31.6	1	4BB;	Live birth 1	40	3500	Male
35691	2	21.99	Primary	PCOS(Female)	1	4.41	6.18	10.14	0.4	39.92	9.2	32.3	1	4AB;	Live birth 1	40	3500	Male
32427	4	21.08	Primary	PCOS(Female)	1	5.26	6.14	10.25	0.45	56.47	10	28.5	1	4AB;	Live birth 1	40	3450	Male
35347	4	20.2	Primary	Female	1	6.25	7.48	8.59	0.47	58.14	8	31	1	4AB;	Live birth 1	40	3400	Male
37425	3	26.29	Primary	Both	1	8.98	7	29.44	0.94	43.22	9.6	27.4	1	4BA;	Live birth 1	40	3340	Female
29858	1	14.87	Secondary	Female	1	5.36	8.15	12.12	0.45	54.15	8	22.6	1	4BB;	Live birth 1	40	3150	Male	GDM
38033	2	23.71	Secondary	Female	2	4.31	6.69	4.51	0.64	35.26	8.2	30.1	1	4BB;	Live birth 1	41	4000	Female
31047	2	22.89	Secondary	Female	1	2.02	6.99	10.15	0.32	42.52	8.8	34.5	1	4BB;	Live birth 1	41	3600	Female
39439	4	18.55	Secondary	Unexplained	1	5.13	8.92	12.88	1	43.35	9	33.2	1	4BB;	Live birth 1	41	3600	Male
38205	1	17.01	Secondary	Both	1	3.97	6.66	4.64	0.49	57.75	11	33.4	1	4AB;	Live birth 1	41	3450	Female
38630	2	18.43	Secondary	Unexplained	1	5.26	5.48	11.25	0.21	52.12	9	36	1	4BB;	Live birth 1	41	3050	Male
35735	5	20.8	Primary	Unexplained	1	15.91	6.59	15.55	0.21	59.86	7	29.2	1	4BA;	Live birth 1	42	3710	Female
33924	1	23.83	Secondary	Female	1	10.25	5.47	12.14	0.47	52.16	9	32.7	1	4AB;	Live birth 1	29+2	1350	Male	Preterm birth
32118	5	32.01	Secondary	Female	1	5.98	7.55	10.31	0.44	35.01	9.5	27.2	1	4AB;	Live birth 1	31+1	1700	Female	Preterm birth
32506	1	29.14	Primary	PCOS(Female)	1	13.47	5.51	22.57	0.42	47.39	9.4	25.1	1	4BB;	Live birth 1	32+5	2000	Female	Preterm birth GDM
13088	4	19.81	Secondary	Male	2	1.87	5.16	5.96	0.76	34.85	9	34.1	1	4BB;	Live birth 1	34+1	2300	Female	Preterm birth
30448	5	19.56	Secondary	Male	1	6.23	7.16	13.58	0.21	47.56	10.2	30.1	1	4AB;	Live birth 1	34+3	2140	Female	Preterm birth
39010	3	22.6	Primary	Unexplained	1	5.88	7.74	17.36	0.87	39.86	8.5	28.5	1	4BB;	Live birth 1	34+4	2800	Male	Preterm birth
27523	5	27.77	Primary	Female	2	5.34	5.5	7.2	0.86	38.63	10	30.2	1	5BB;	Live birth 1	34+4	2500	Female	Preterm birth
31286	1	20.03	Primary	Both	1	17.28	6.86	8.1	0.36	50.92	9.8	24.4	1	4BB;	Live birth 1	35+1	2250	Male	Preterm birth
32020	5	25.1	Primary	Female	1	3.76	5.24	20.09	0.71	56.91	9.2	28.8	1	5BB;	Live birth 1	35+4	2400	Female	Preterm birth
32248	3	22.43	Primary	PCOS(Female)	1	5.75	5.77	22.85	0.45	44.1	11	26.9	1	4BB;	Live birth 1	35+4	2250	Female	Preterm birth
19548	3	20.69	Secondary	Female	2	5.93	9.64	11.58	0.87	40.4	10.1	31.1	1	4AA;	Live birth 1	35+5	2500	Female	Preterm birth
29960	3	26.56	Secondary	PCOS(Female)	2	2.76	1.58	6.09	0.69	11.8	8.5	31.8	1	4BB;	Live birth 1	35+6	3000	Male	Preterm birth
33028	2	26.91	Primary	Female	1	2.75	5.22	17.59	0.69	26.56	8	27.2	1	4BA;	Live birth 1	35+6	2600	Female	Preterm birth
33080	1	26.04	Secondary	Female	1	3.79	6.31	14.68	0.24	30.79	9.2	29.1	1	4AB;	Live birth 1	35+6	2100	Male	Preterm birth/gestational hypertension
29262	6	25.28	Primary	PCOS(Female)	2	6.69	4.83	18.72	0.79	46.96	8.8	31.7	1	4AA;	Live birth 2	36+1	2650/3150	Male/Male	Preterm birth
21573	1	17.48	Secondary	Ems(Female)	2	5.01	8.8	11.64	0.28	45.3	10.5	35.1	1	4AA;	Live birth 1	36+1	2750	Male	Preterm birth
32322	4	24.84	Secondary	Both	2	4.1	6.52	21.86	0.69	44.66	9	29.7	1	4BB;	Live birth 1	36+3	2600	Female	Preterm birth
28283	3	19.43	Primary	Ems(Female)	2	5.92	10.73	24.03	0.73	43.84	10.5	29	1	4BA;	Live birth 2	36+4	2550/2520	Female/Female	Preterm birth
28167	5	20.81	Primary	PCOS(Female)	1	3.35	6.52	14.11	0.46	36.76	11.3	28.1	1	4BB;	Live birth 2	36+4	2350/2350	Female/Female	Preterm birth/GDM
31147	9	24.65	Secondary	PCOS(Female)	2	1.97	2.99	6.31	0.42	33.4	9	34.8	1	4BA;	Live birth 1	36+5	2250	Male	Preterm birth
37181	2	17.15	Primary	Unexplained	1	5.27	5.55	16.51	0.27	67.85	8.5	34.5	1	4BA;	Live birth 1	37+2	2980	Male
32254	3	27.18	Primary	Male	2	1.6	4.75	10.08	0.48	33.7	9.4	34.6	1	4AB;	Live birth 1	37+2	2590	Female
37928	2	22.89	Primary	Unexplained	1	3.22	6.92	12.09	0.53	31.89	8	28.7	1	4BB;	Live birth 1	37+2	2350	Female
27178	3	21.79	Secondary	Female	2	3.59	6.14	19.95	0.45	58.8	11	31.4	1	4BB;	Live birth 2	37+3	2750/2765	Male/Male
31639	5	21.88	Primary	PCOS(Female)	1	7.23	6.47	5.43	0.58	40.5	8.2	25.9	1	4BA;	Live birth 1	37+3	3150	Male
30891	7	21.48	Secondary	Female	2	2.84	5.61	11.03	0.35	56.29	12	34.8	1	4BB;	Live birth 1	37+3	2900	Male
33678	6	30.08	Secondary	Both	2	5.64	7.14	14.06	0.41	28.31	8.5	27.8	1	4BB;	Live birth 1	37+3	2700	Male
29444	1	28.91	Secondary	PCOS(Female)	1	10.25	4.85	10.47	0.47	45.26	8.5	33.6	1	4BA;	Live birth 1	37+4	2800	Female
37728	4	18.78	Secondary	PCOS(Female)	1	4.1	6.95	14.65	0.44	27.77	7	34.4	1	4BB;	Live birth 1	37+4	2700	Male
30560	2	26.04	Secondary	Unexplained	1	6.53	7.6	9.08	0.42	50	8	35.2	1	4BB;	Live birth 1	37+5	3600	Female
34530	2	17.71	Primary	Female	1	4.94	7.63	22.92	0.4	50.42	8	30.7	1	4AB;	Live birth 1	37+5	3300	Male
31938	5	19.53	Secondary	Unexplained	2	5.26	5.14	8.25	0.47	56.14	7	29.6	1	4BB;	Live birth 1	37+5	3100	Female	GDM
33434	1	20.94	Secondary	Both	1	14.71	7.06	11.21	0.67	71.55	7.6	28.8	1	4AB;	Live birth 1	37+5	3050	Male
37570	3	21.33	Secondary	Female	1	7.63	11.57	11.61	0.42	73.16	9	28.3	1	4AB;	Live birth 2	37+6	2650/3000	Male/Male
32365	1	18.67	Secondary	Both	1	2.37	6.32	11.66	0.41	40.48	7.1	30.5	1	4BB;	Live birth 1	37+6	3250	Male	GDM
30273	2	19.71	Primary	Ems(Female)	1	5.26	4.28	10.15	0.15	47.2	10	29.8	1	5BA;	Live birth 1	37+6	3180	Male
31273	3	20.08	Secondary	Female	1	5.62	10.25	10.21	0.47	23.25	10.1	32.7	1	4BB;	Live birth 1	37+6	3000	Male
30991	1	18.43	Secondary	Both	1	13.49	6.72	5.94	0.76	49.86	9.5	31.9	1	4BB;	Live birth 1	37+6	2800	Male
30688	3	19.88	Primary	Unexplained	1	10.25	5.26	11.26	0.26	51.23	9.3	32.3	1	4BB;	Live birth 1	37+6	2780	Male
33344	2	21.64	Primary	Female	1	1.9	6.95	20.51	0.32	48.47	8.3	28.6	1	4BA;	Live birth 1	37+6	2550	Female
36124	3	18.26	Primary	Both	2	4.69	6.82	12.66	0.59	54.55	9	28.5	1	4BB;	Live birth 1	38+1	3280	Female
32237	2	19.43	Primary	Both	1	2.83	5.63	8.11	0.66	28.73	8.5	29	1	4AA;	Live birth 1	38+1	3250	Male
31182	7	17.19	Primary	Both	1	4.45	7.21	12.23	1.17	52.2	8.4	31.3	1	4BB;	Live birth 1	38+1	3000	Male
22732	1	21.37	Secondary	Both	2	16.97	5.2	16.17	0.44	51.27	10	29.8	1	4AA;	Live birth 1	38+1	1800	Male
31917	3	22.31	Secondary	Both	2	5.49	6.88	15.7	0.55	49.09	8.5	33.8	1	4BB;	Live birth 1	38+2	3550	Male
34228	3	18.36	Primary	PCOS(Female)	1	6.19	6.68	13.25	0.43	32.3	11	28.1	1	4AB;	Live birth 1	38+2	3400	Male
31884	2	20.31	Primary	Both	2	2.85	2.18	12.68	0.35	21.91	9.6	24.2	1	4BA;	Live birth 1	38+2	3300	Female
37147	1	19.98	Secondary	Female	1	5.26	8.47	10.25	0.48	56.24	8	35.2	1	4AB;	Live birth 1	38+2	3000	Female
37601	2	18.65	Primary	Female	1	5.61	7	14.84	0.3	57.12	8.3	28.4	1	4BA;	Live birth 1	38+3	3960	Male
32833	1	24.44	Secondary	Male	1	5.27	7.48	8.26	0.47	52.45	9	35.9	1	4BB;	Live birth 1	38+3	3710	Male	GDM
30406	1	28.76	Secondary	Male	1	4.28	5.26	10.14	0.48	42.16	9	33.9	1	4BB;	Live birth 1	38+3	3700	Male	GDM
32531	2	16.02	Secondary	Female	1	3.93	7.34	7.62	0.57	46.33	8.5	30.4	1	4AB;	Live birth 1	38+3	3530	Female
25750	3	18.9	Secondary	Female	2	3.67	11.88	11.29	0.42	31.36	9.1	35.5	1	4AB;	Live birth 1	38+3	3350	Female
38765	3	17.78	Primary	Female	1	6.23	8.47	10.25	0.47	26.25	7.8	21	1	4AB;	Live birth 1	38+3	3200	Male
34846	1	21.33	Primary	Ems(Female)	1	4.58	4.26	10.25	0.45	42.25	13.3	27.4	1	4AB;	Live birth 1	38+3	3150	Female
32129	3	21.91	Secondary	Female	2	3.52	6.85	13.26	0.41	34.48	8	31.5	1	4AB;	Live birth 1	38+3	3100	Male
35795	2	20.2	Secondary	Unexplained	1	4.85	9.81	12.06	0.45	42.15	9.6	29.7	1	4BA;	Live birth 1	38+3	3050	Male	GDM
31132	1	19.14	Secondary	Female	1	6.25	4.98	12.12	0.45	56.21	12	34.9	1	4AB;	Live birth 1	38+3	2800	Female
37292	3	20.03	Secondary	Female	1	4.9	5.95	22.53	0.41	57.44	7.6	31.9	1	4AB;	Live birth 1	38+4	3600	Female
38102	8	21.23	Primary	Male	1	3.48	7.7	27.04	0.79	53.18	8	35.9	1	4BB;	Live birth 1	38+4	3400	Male
20477	1	23.44	Secondary	Female	2	4.33	4.54	5	0.69	29.45	8	27.4	1	4AA	Live birth 1	38+4	3200	Male
29376	1	20.9	Secondary	Female	1	3.61	8.75	8.83	0.58	40.26	9	35.7	1	4BB;	Live birth 1	38+4	3000	Female
31926	5	20.5	Primary	Female	2	4.28	9.8	9.07	0.56	29.77	11	24.9	1	4BB;	Live birth 1	38+4	3000	Male
35909	1	19.43	Secondary	Female	1	10.25	8.25	6.29	0.48	57.14	10	28.2	1	4BB;	Live birth 1	38+4	2830	Male	Birth defect
21084	4	26.67	Secondary	Both	2	4.86	3.91	3.9	0.3	58.9	9.4	33.3	1	4AB;	Live birth 1	38+4	2800	Male
32836	1	24.34	Secondary	PCOS(Female)	1	10.25	5.62	8.78	0.47	54.14	10	34.8	1	4BB;	Live birth 1	38+5	3750	Female
35081	2	18.29	Primary	PCOS(Female)	2	8.66	6.87	2.62	0.65	40.95	10	30.8	1	4BB;	Live birth 1	38+5	3722	Female
33499	8	22.48	Primary	Male	1	3.24	8.17	6.74	0.42	35.64	10	32.9	1	4AA;	Live birth 1	38+5	3700	Female
32571	1	18.59	Secondary	Female	1	7.14	6.8	8.94	1.01	40.19	8	34.2	1	4BA;	Live birth 1	38+5	3700	Male
30274	4	21.78	Primary	Both	1	8.04	8	8.79	0.72	44.11	12	28.5	1	4AB;	Live birth 1	38+5	3610	Female	GDM
32842	5	20.03	Secondary	Female	1	13.39	8.95	11.64	0.64	36.44	11	30.4	1	4BB;	Live birth 1	38+5	3400	Female
29734	2	23.81	Primary	Male	1	4.4	8.96	13.59	0.58	44.54	9	27.2	1	4AB;	Live birth 1	38+5	3250	Female
33916	2	21.48	Secondary	Female	2	4.39	5.93	13.15	0.33	50.89	9	35	1	4BB;	Live birth 1	38+5	3150	Female
35168	3	25.64	Primary	Female	1	2.67	5.27	13.82	0.6	29.83	9.7	31.2	1	4BA;	Live birth 1	38+5	3050	Male
30366	5	25.2	Secondary	Female	1	1.35	6.6	12.54	1.12	32.83	9.3	34.5	1	4AA;	Live birth 1	38+5	3000	Male
31343	5	22.89	Primary	PCOS(Female)	1	6.35	6.26	6.76	0.78	43.84	8.7	27.1	1	4BB;	Live birth 1	38+5	3000	Male
36928	2	28.89	Secondary	Unexplained	1	2.95	6.19	9.75	0.52	24.01	11	28.6	1	4BB;	Live birth 1	38+5	2800	Male
37892	4	19.23	Secondary	Female	1	2.56	8.47	11.25	0.48	24.15	11	32	1	4BB;	Live birth 1	38+6	4000	Male
30981	1	21.48	Primary	PCOS(Female)	1	11.55	7.92	9.74	0.72	60.42	10	30.7	1	4BA;	Live birth 1	38+6	3800	Female
33469	6	28.44	Primary	Both	1	2.1	6.72	21.85	0.54	58.14	10	27.8	1	4BB;	Live birth 1	38+6	3600	Female
32030	6	24.8	Primary	Male	1	6.26	4.87	8.47	0.48	42.26	14.9	30.3	1	4AB;	Live birth 1	38+6	3600	Female
30166	3	17.06	Secondary	Unexplained	1	7.58	7.97	4.08	0.58	63.69	8	31.9	1	4BA;	Live birth 1	38+6	3550	Male
27259	6	18.29	Primary	Both	2	5.8	11.8	16.59	0.67	41.23	10	28.9	1	4BA;	Live birth 1	38+6	3400	Male
33416	5	28.84	Primary	Both	1	2.97	4.86	6.74	0.75	36.23	8.5	28.9	1	4BB;	Live birth 1	38+6	3100	Female
32634	3	18.37	Primary	PCOS(Female)	1	9.13	7.93	27.97	0.55	52.88	8	28	1	4BA;	Live birth 1	39+1	4250	Male
35511	5	18.67	Primary	Both	1	3.89	6.2	16.76	0.58	50.88	9	30.6	1	4AB;	Live birth 1	39+1	3900	Male
36158	2	30.08	Primary	PCOS(Female)	1	2.91	2.14	21.085	0.83	62.51	7.8	30.3	1	4BA;	Live birth 1	39+1	3510	Male
29635	2	21.09	Primary	PCOS(Female)	1	4.28	6.51	13.86	0.53	49.18	7.7	30.9	1	4BB;	Live birth 1	39+1	3500	Female
31061	1	18.83	Secondary	Both	1	6.26	8.17	25.14	0.45	56.14	8	29.3	1	4BA;	Live birth 1	39+1	3500	Male
25768	1	22.04	Secondary	Female	2	7.08	6.04	10.72	0.6	66.77	9	34.5	1	4BA;	Live birth 1	39+1	3450	Male
29996	1	23.01	Secondary	Female	2	4.37	7.03	9	0.24	38.52	9	30	1	4AB;	Live birth 1	39+1	3400	Female
33632	1	21.56	Primary	Female	1	7.22	8.23	14.44	0.36	36.68	7.5	27.5	1	4BA;	Live birth 1	39+1	3300	Male
31896	2	20.57	Secondary	Female	1	4.71	7.18	10.87	0.85	28.22	7.8	32.9	1	4AB;	Live birth 1	39+1	3250	Male
33308	3	20.28	Primary	Both	1	18.73	6.13	12.5	0.5	81.15	12	26.8	1	4BB;	Live birth 1	39+1	3250	Male
30056	1	17.97	Secondary	Female	1	1.98	4.93	14.15	0.41	37.36	9	30.2	1	4BA;	Live birth 1	39+1	3100	Male	GDM
36334	2	22.27	Secondary	Both	2	8.96	5.92	9.88	0.77	63.45	11	30.7	1	4BB;	Live birth 1	39+1	3100	Male
29983	2	19.05	Secondary	Female	1	6.23	4.17	10.45	0.78	45.12	10	25	1	4BB;	Live birth 1	39+1	3100	Male
36238	2	20.2	Primary	Female	1	6.86	4.47	8.98	0.43	41.76	7.8	25.6	1	4BA;	Live birth 1	39+1	3000	Female
35720	1	17.15	Primary	Both	1	10.92	7.06	22.9	0.51	52.9	9	25.7	1	4BB;	Live birth 1	39+1	2400	Male
35675	3	23.94	Primary	PCOS(Female)	1	5.85	10.24	15.14	0.48	45.26	7.3	30.7	1	4BA;	Live birth 1	39+1	2300	Male
25857	2	17.48	Secondary	Female	1	3.94	6.98	9.77	0.84	58.66	9.7	34.5	1	4BB;	29W-miscarriage
33616	4	19.33	Secondary	Female	1	2.79	9.06	11.25	0.48	41.86	9	31.5	1	4AB;	Live birth 1	39+2	3710	Male
31299	2	21.88	Primary	Female	1	3.85	6.14	21.01	0.54	66.92	10.8	30	1	4BA;	Live birth 1	39+2	3700	Female
32272	2	25.39	Secondary	Both	1	1.64	6.54	18.6	0.48	16.5	8	23.1	1	4BB;	Live birth 1	39+2	3700	Male
32035	2	18.67	Secondary	Female	1	2.75	8.42	11.44	0.7	43.94	9.1	29.8	1	4BB;	Live birth 1	39+2	3400	Male
19558	2	21.21	Secondary	PCOS(Female)	2	6.99	7.36	10.1	0.67	35.92	8	27.3	1	4AB;	Live birth 1	39+2	3350	Male
19459	3	22.04	Secondary	Unexplained	2	2.99	6.94	4.87	0.45	39.63	9	30	1	4AB;	Live birth 1	39+2	3250	Female
34624	2	21.8	Primary	Male	2	7.85	9.23	10.71	0.27	33.67	10.3	31.1	1	4BA;	Live birth 1	39+2	3250	Female
35142	2	20.4	Secondary	Both	1	4.24	8.74	8.35	0.36	42.31	10.4	29.9	1	4BA;	Live birth 1	39+2	3150	Female
36061	2	22.04	Primary	PCOS(Female)	2	10.25	6.58	11.25	0.47	52.26	10	26.4	1	4BA;	Live birth 1	39+2	3020	Male
29181	2	18.83	Primary	Unexplained	1	5.73	7.48	20.43	0.45	43.35	9	32.6	1	4AB;	Live birth 1	39+2	2550	Male
30420	2	20.17	Primary	Male	1	4.02	9.06	7.6	0.7	42.1	9	27.7	1	4BB;	Live birth 1	39+3	3750	Male
36056	1	19.95	Secondary	Both	1	4.07	7.57	10.21	0.61	30.92	9	30.2	1	4BA;	Live birth 1	39+3	3700	Male
31500	2	19.72	Primary	Female	1	4.68	10.27	25.85	0.72	44.95	9	29.6	1	4AB;	Live birth 1	39+3	3650	Male
36883	5	19.11	Primary	Female	1	3.75	6.2	13.26	0.28	62.9	9	30	1	4BA;	Live birth 1	39+3	3600	Male
38073	1	18.83	Secondary	Female	2	8.82	6.79	25.64	0.28	79.72	11	30.7	1	4BB;	Live birth 1	39+3	3600	Male
36217	4	20.7	Primary	Both	1	5.26	8.14	10.25	0.25	25.41	8.5	31.3	1	4BA;	Live birth 1	39+3	3550	Male
31295	5	19.15	Primary	Female	1	5.06	6.26	11.21	0.84	34.02	8.7	23.8	1	4BB;	Live birth 1	39+3	3480	Female
20396	3	21.97	Secondary	Female	2	3.06	5.36	11.75	0.43	35.09	8.5	30.6	1	4AA;	Live birth 1	39+3	3400	Female
35026	3	18.36	Primary	PCOS(Female)	1	5.19	6.79	12.18	0.47	56.14	8.4	32.1	1	4BB;	Live birth 1	39+3	3310	Female
33463	3	20.55	Primary	Female	1	3.18	9.65	19.87	0.54	33.02	7	34.4	1	4BB;	Live birth 1	39+3	3150	Male
27476	3	17.71	Secondary	Female	2	4.01	8.74	36.1	0.51	37.53	8.7	34.6	1	4BB;	Live birth 1	39+3	3100	Male
30583	1	17.69	Secondary	Male	1	4.19	6.03	16.2	0.53	38.23	9	34.1	1	4BA;	Live birth 1	39+3	3050	Female
36219	1	18.87	Secondary	Both	1	5.15	8.58	12.17	0.39	46.99	9	24.7	1	4BB;	Live birth 1	39+3	3000	Female
32904	2	16	Secondary	Female	1	3.48	6.78	26.18	0.65	45.65	7.3	25.2	1	4BB;	Live birth 1	39+3	2900	Female
35877	5	23.88	Secondary	Female	1	5.87	8.35	12.25	0.45	25.47	8.5	35	1	4BA;	Live birth 1	39+4	4850	Male
35911	2	26.37	Secondary	Female	2	4.84	4.21	11.65	0.39	31.07	9.1	35.7	1	4BB;	Live birth 1	39+4	4350	Male
19853	3	19.14	Secondary	PCOS(Female)	2	5.14	6.24	13.51	0.48	39.6	10	29.7	1	4AB;	Live birth 1	39+4	4200	Male
30286	1	20.62	Secondary	Both	1	5.87	9.63	28.88	0.79	46.89	11	30.3	1	4AB;	Live birth 1	39+4	3960	Male
32094	1	22.15	Secondary	Female	1	3.96	10.07	12.45	0.71	57.76	7.9	33.2	1	4BA;	Live birth 1	39+4	3700	Male
31937	4	30.85	Secondary	PCOS(Female)	1	1.41	5.63	5.09	0.28	36.23	11.4	28.8	1	4BA;	Live birth 1	39+4	3500	Male
39850	1	22.64	Secondary	Female	1	4.05	9.32	6.89	0.44	38.6	9	25.4	1	4BB;	Live birth 1	39+4	3500	Male
32737	3	19.2	Primary	PCOS(Female)	1	16.3	7.4	11.24	0.4	41.91	10.4	26.3	1	4BB;	Live birth 1	39+4	3490	Female
35935	4	20.7	Primary	Male	1	2.58	5.45	11.47	0.47	52.26	9.2	32.8	1	4AB;	Live birth 1	39+4	3400	Female
38478	4	25.34	Primary	Female	1	6.96	8	13.35	0.67	37.16	7.9	28.9	1	4BB;	Live birth 1	39+4	3200	Male
31231	9	17.31	Primary	Female	1	2.87	3.95	14.81	0.24	53.32	10.7	30	1	4BB;	Live birth 1	39+4	3020	Female
31158	5	20.08	Secondary	Female	1	13.65	6.32	12.97	0.34	37.67	10.9	28.8	1	4AB;	Live birth 1	39+4	2890	Female
37836	3	23.23	Secondary	PCOS(Female)	1	3.8	5.45	10.63	0.49	60.57	8	33.1	1	4BA;	Live birth 1	39+5	4250	Male
32618	1	20.03	Primary	PCOS(Female)	1	3.17	4.86	6.73	0.52	53.53	8.6	30.8	1	4BA;	Live birth 1	39+5	4174	Male
33532	1	18.75	Secondary	Both	1	10.25	5.46	10.25	0.48	21.15	9	30.5	1	4BB;	Live birth 1	39+5	4150	Male
38278	3	21.41	Secondary	Female	2	6.25	5.12	11.45	0.47	45.26	9.5	27.9	1	4BA;	Live birth 1	39+5	4100	Male
26902	1	24.03	Secondary	Both	2	4.16	6.69	13.16	0.53	38.83	9	27.8	1	4AB;	Live birth 1	39+5	3950	Male
34798	3	23.51	Primary	PCOS(Female)	1	18.84	7.88	16.23	0.3	46.51	10	25.1	1	4AB;	Live birth 1	39+5	3950	Male
30784	3	22.03	Secondary	Unexplained	1	4.26	5.91	10.99	0.21	20.68	7	30	1	4AB;	Live birth 1	39+5	3900	Male
32333	1	18.18	Primary	Female	1	4.07	2.23	14.79	0.46	18.48	8.3	27.4	1	4BB;	Live birth 1	39+5	3570	Male
37103	4	16.18	Primary	Both	1	1.99	6.16	9.17	0.59	33.44	8	29.4	1	4BB;	Live birth 1	39+5	3550	Female
28621	2	17.04	Primary	Female	2	5.66	8.14	10.24	0.45	45.18	8	33.6	1	4AB;	Live birth 1	39+5	3400	Male
32147	2	19.2	Secondary	Male	2	2.85	8.04	10.33	0.62	44.57	10	30.1	1	4BB;	Live birth 1	39+5	3400	Male
30696	5	20.28	Secondary	Both	1	2.89	6.82	7.52	0.74	31.18	8.3	30.7	1	4BA;	Live birth 1	39+5	3350	Female
34108	6	19.92	Primary	Unexplained	1	1.5	5.43	8.18	0.4	53.82	7.5	34.1	1	4AB;	Live birth 1	39+5	3300	Female
30541	2	20.96	Primary	Unexplained	1	3.88	8.08	17.54	0.59	44.51	9.6	28.7	1	4BB;	Live birth 1	39+5	3300	Male
38899	3	17.26	Primary	Both	1	5.52	6.32	16.21	0.62	39.07	8.5	28.9	1	4BB;	Live birth 1	39+5	3200	Male
31616	1	24.97	Secondary	Female	1	4.13	4.32	14.54	0.54	36.9	9	34	1	4AA;	Live birth 1	39+5	3150	Female
35110	2	20.2	Primary	PCOS(Female)	1	4.57	6.89	10.76	0.5	22.9	11.9	26.6	1	4BB;	Live birth 1	39+5	3150	Male
33321	2	16.82	Secondary	Female	1	7.65	9.2	20.26	0.21	28.97	8	30.2	1	4BB;	Live birth 1	39+5	3100	Male
30995	3	17.53	Secondary	Female	1	5.9	8.68	14.73	0.4	57.45	9	27.3	1	4BB;	Live birth 1	39+5	3020	Male
35918	3	17.4	Primary	Both	1	1.05	5.04	7.49	0.57	40.28	11	31.2	1	4AB;	Live birth 1	39+5	3000	Female	Birth defect
32007	1	20.94	Secondary	Both	2	5.38	5.75	10.23	0.75	54.13	7.6	24.1	1	4BA;	Live birth 1	39+6	4100	Male
33130	3	22.58	Primary	PCOS(Female)	1	14.02	8.09	6.9	0.97	50.86	10	26.7	1	4BB;	Live birth 1	39+6	3900	Male
36655	4	23.44	Secondary	Female	1	2.98	8.55	10.72	0.35	34.7	9	29.4	1	4BB;	Live birth 1	39+6	3800	Male
28571	2	18.82	Secondary	PCOS(Female)	2	2.77	5.44	12.56	0.56	35.66	8.5	32.2	1	4AB;	Live birth 1	39+6	3780	Male
31649	1	22.86	Primary	Male	2	4.98	7.11	10.42	0.6	36.74	9	26.5	1	4BB;	Live birth 1	39+6	3700	Male
37481	2	20.03	Primary	Both	2	2.58	7.54	11.85	0.39	45.61	10	25.1	1	4BA;	Live birth 1	39+6	3700	Male
32438	7	27.56	Primary	Both	1	4.66	5.93	18.05	0.95	43.04	10.6	25.2	1	4BA;	Live birth 1	39+6	3650	Female
31479	1	20.32	Secondary	Unexplained	1	6.26	4.58	10.25	0.48	45.17	9	32.7	1	4AA;	Live birth 1	39+6	3650	Female
29944	3	19.96	Primary	Male	1	3.47	7.55	22.64	0.59	53.61	10.5	31.2	1	4BB;	Live birth 1	39+6	3650	Male
29884	2	24.61	Primary	Female	2	2.91	6.07	11.62	0.92	29.92	9.6	29.7	1	4BB;	Live birth 1	39+6	3500	Female
38222	1	16.94	Secondary	Female	1	6.25	9.14	25.14	0.25	47.34	7.5	29.8	1	4BB;	Live birth 1	39+6	3350	Female
35992	5	21.05	Primary	PCOS(Female)	1	2.58	6.58	10.25	0.48	26.58	8.6	30.1	1	4BB;	Live birth 1	39+6	3250	Male
27699	4	20.7	Primary	Male	1	5.06	6.12	9.54	0.38	32.29	7.3	34.4	1	4BB;	Live birth 1	39+6	2750	Male
28457	2	17.15	Primary	Female	2	5.77	9.09	13.02	0.98	53.96	9	23.6	1	4AB;	Live birth 1	39+6	2500	Female
29678	1	20.94	Secondary	Female	2	5.18	10.88	23.51	0.21	63.55	10	29.3	1	4BB;	Live birth 1	39+6	2470	Female
38038	5	27.55	Primary	Both	2	9.25	8.14	14.15	0.47	52.45	11	28.4	1	4BB;	Live birth 1	39+6	2350	Male
33281	1	22.89	Secondary	Female	1	2.61	6.03	17.71	0.4	28.59	7.5	31.5	1	4BB;	Live birth 1	40+1	4300	Male
29523	3	26.3	Primary	PCOS(Female)	1	7.84	7.61	8.39	0.21	16.62	11	27	1	4BB;	Live birth 1	40+1	3750	Female
36160	1	22.04	Secondary	Female	2	3.65	7.47	3.45	0.37	35.76	9	31.5	1	4BB;	Live birth 1	40+1	3700	Female
37850	1	20.32	Primary	Female	1	3.63	5.47	9.1	0.54	50.89	9	29	1	4BA;	Live birth 1	40+1	3500	Female
35728	1	24.16	Primary	Both	1	4.55	7.36	15.39	0.3	31.46	9.7	32.7	1	4BA;	Live birth 1	40+1	3300	Female
29471	1	21.88	Primary	Female	2	4.04	8.16	10.77	0.45	37.77	8.3	31.5	1	5BB;	Live birth 1	40+1	3100	Male
29758	1	21.5	Secondary	Female	2	3.66	7.98	23.6	0.81	49.64	7	28.1	1	4AB;	Live birth 1	40+1	3050	Female
32850	5	18.59	Secondary	Female	1	7.84	5.8	10.82	0.43	51.06	7.8	23.7	1	4BB;	Live birth 1	40+1	3050	Female
35884	1	18.36	Secondary	Unexplained	1	6.25	6.14	10.47	0.48	25.14	10.4	30	1	4BA;	Live birth 1	40+1	3000	Female
30282	1	22.89	Secondary	Female	1	1.48	4.46	21.07	0.41	46.28	8.2	25.9	1	4AB;	Live birth 1	40+1	2800	Male
31436	3	24.8	Primary	Female	1	3.65	6.09	8.59	0.52	53.03	9	31.6	1	4BA;	Live birth 1	40+2	3900	Female
30740	1	18.07	Secondary	Female	1	2.56	4.58	10.12	0.48	15.23	9	26.6	1	4BB;	Live birth 1	40+2	3600	Male
29433	6	16.85	Secondary	Female	2	4.06	10.34	13.71	1.01	45.54	8.5	31.8	1	4BB;	Live birth 1	40+2	3550	Female
35178	2	19.83	Primary	Unexplained	1	1.85	4.81	10.1	0.29	27.69	13	26.8	1	4BB;	Live birth 1	40+2	3400	Male
33465	1	21.45	Secondary	Unexplained	1	3.93	9.86	23.15	0.39	36.31	9.2	25.3	1	4BB;	Live birth 1	40+2	3350	Male
31973	1	21.41	Secondary	Female	1	4.36	6.76	13.44	0.86	39.35	7.5	27.7	1	4AA;	Live birth 1	40+2	3290	Female
28304	3	20.03	Primary	Male	1	4.19	5.57	6.47	0.82	53.48	10	32.5	1	4AB;	Live birth 1	40+2	3100	Female
39638	7	18.31	Secondary	Ems(Female)	1	7.53	7.69	16.86	0.43	40	8.5	29.2	1	4AB;	Live birth 1	40+2	2600	Female
38674	3	21.45	Primary	Unexplained	2	6.25	11.47	0.58	0.45	39.56	10	27.4	1	4BB;	Live birth 1	40+3	4600	Female	GDM
33260	5	23.44	Primary	Female	1	4.8	7.58	19.73	0.57	34.35	9.8	32.3	1	4BB;	Live birth 1	40+3	4100	Male
31191	14	21.45	Primary	Both	1	4.13	6.19	8.99	0.66	36.43	10.4	30.2	1	5BB;	Live birth 1	40+3	4050	Male
38466	3	20.81	Primary	Female	1	4.73	5.69	7.6	0.21	32.95	10	30.8	1	4AB;	Live birth 1	40+3	4000	Male
36266	12	20.7	Secondary	Both	1	3.28	7.8	6.97	0.27	28.51	11.3	32.7	1	4BB;	Live birth 1	40+3	3800	Female
30831	1	26.35	Secondary	Female	1	5.15	5.45	23.85	0.6	48.45	11	34.9	1	4BB;	Live birth 1	40+3	3750	Female
38181	4	20.03	Primary	PCOS(Female)	1	5.56	9.58	0.47	0.45	25.15	7.5	31.6	1	4BA;	Live birth 1	40+3	3700	Male
32519	1	18.37	Primary	PCOS(Female)	1	5.82	5.4	21.93	0.49	29.86	11.2	30.5	1	4BA;	Live birth 1	40+3	3650	Male
29780	4	20.57	Secondary	Female	1	8.44	7.27	17.42	0.28	54.28	9.5	27.1	1	4BA;	Live birth 1	40+3	3600	Female
30206	1	20.28	Primary	Ems(Female)	1	5.55	9.75	12.25	0.5	58.54	10	24.7	1	5BA;	Live birth 1	40+3	3500	Female
33009	3	17.63	Primary	Both	1	3.4	6.66	29.82	0.44	37.01	7	27.1	1	4AB;	Live birth 1	40+3	3400	Female
32317	3	26.49	Primary	PCOS(Female)	1	4.75	5.68	14.5	0.8	49.7	8.5	30.1	1	4BA;	Live birth 1	40+3	3350	Female
33254	5	22.04	Secondary	Unexplained	1	7.5	6.63	10.69	0.59	36.21	11	30.7	1	4AB;	Live birth 1	40+3	3300	Female
29001	3	18.43	Primary	Male	1	6.79	8.94	12.88	0.38	33.55	11.2	33.5	1	4AB;	Live birth 1	40+3	3150	Female
30910	2	21.51	Primary	Male	1	5.02	9.62	14.48	0.31	35.84	12	35.7	1	4BB;	Live birth 1	40+3	3150	Female
33092	7	17.71	Primary	PCOS(Female)	1	5.6	5.87	8.64	0.65	28.89	10.8	30.8	1	4BB;	Live birth 1	40+3	3100	Male
30111	7	23.59	Primary	Male	1	3.38	7.84	18.08	0.45	35.75	10	22.2	1	4BA;	Live birth 1	40+3	3050	Female
33207	5	29.3	Secondary	Both	1	4.34	8.3	15.5	0.79	63.24	10	25.8	1	4BB;	Live birth 1	40+4	4350	Female
39250	3	25.39	Primary	Male	1	2.44	8.63	8.09	0.3	37.5	9.5	26.1	1	4BB;	Live birth 1	40+4	3750	Male
39087	1	22.03	Primary	Ems(Female)	1	3.56	5.04	13.84	0.27	38.76	9.5	30.7	1	4BA;	Live birth 1	40+4	3580	Female
31051	4	30.67	Secondary	Both	2	4.22	8.09	12.57	0.57	44.7	8.5	32.6	1	4BA;	Live birth 1	40+4	3400	Male
30231	4	18.75	Primary	Unexplained	2	1.49	4.99	8.77	0.32	56.73	10.3	32.3	1	4BB;	Live birth 1	40+4	3150	Female
29946	2	19.14	Primary	Male	1	5.68	6.84	15.5	0.51	68.68	7.5	30.4	1	4BA;	Live birth 1	40+4	3150	Male
18347	5	19.13	Secondary	Unexplained	1	5.62	7.89	12.25	0.45	26.74	8	31.9	1	4BA;	Live birth 1	40+4	3090	Female
29706	6	23.95	Secondary	Female	1	6.25	4.78	15.14	0.48	42.16	8	32.8	1	5AB;	Live birth 1	40+4	2900	Female
32887	3	21.07	Primary	Female	1	5.79	5.11	12.46	0.21	68.62	7	30	1	4AB;	Live birth 1	40+5	4300	Male
25982	4	25.39	Secondary	PCOS(Female)	1	7.55	6.65	6.02	0.69	38.81	10.2	31.3	1	4BA;	Live birth 1	40+5	4200	Male
31323	5	19.57	Primary	Both	1	4.48	7.35	18.16	0.74	52.4	9.5	26	1	4AA;	Live birth 1	40+5	4000	Male
32963	4	20.7	Primary	Female	1	5.23	9.05	12.03	0.23	39	8.5	29.1	1	4BB;	Live birth 1	40+5	3900	Female
29260	3	17.75	Secondary	PCOS(Female)	2	9.8	9.55	14.15	0.27	58.27	9	29.1	1	4AA;	Live birth 1	40+5	3850	Male
30521	1	18.59	Secondary	Female	1	6.95	7.01	7.6	0.52	70.11	13	26.2	1	4AB;	Live birth 1	40+5	3700	Female
31614	3	20.69	Primary	Unexplained	1	5.11	5.73	27.1	0.32	55.45	10.6	32.8	1	4BA;	Live birth 1	40+5	3650	Female
34786	1	20.03	Primary	Unexplained	1	6.25	10.25	15.14	0.25	25.15	12	32.4	1	4BB;	Live birth 1	40+5	3600	Male
33732	4	20.2	Secondary	Male	1	3.82	5.72	12.83	0.43	48.93	8.7	28.9	1	4BA;	Live birth 1	40+5	2900	Male
33712	2	22.49	Secondary	Unexplained	1	6.47	10.56	11.25	0.45	47.15	10	26.3	1	4AB;	Live birth 1	40+5	2520	Female
29025	1	20.28	Secondary	Unexplained	2	5.99	8.17	7.39	0.13	18.45	9.8	33.3	1	4AB;	Live birth 1	40+5	2500	Female
30809	4	18.69	Primary	PCOS(Female)	2	6.06	5.86	19.76	0.67	33.71	8	28.4	1	4AA;	Live birth 1	40+6	4250	Male
38450	7	18.96	Secondary	Female	1	5.26	14.11	25.12	0.47	52.14	8	33	1	4BA;	Live birth 1	40+6	4150	Male
33104	5	23.44	Primary	Female	1	6.25	4.78	10.25	0.47	23.25	8	33.1	1	5BB;	Live birth 1	40+6	4000	Male
34898	3	25	Primary	PCOS(Female)	1	1.63	5.19	8.84	0.55	72.72	9.8	28.4	1	4BB;	Live birth 1	40+6	3700	Male
27104	2	17.58	Secondary	Ems(Female)	2	5.65	8.19	5.62	0.77	43.6	7.3	30.5	1	4BB;	Live birth 1	40+6	3650	Male
31017	5	21.93	Secondary	Both	1	1.49	5.13	8.32	0.21	37.84	12	34.7	1	4AA;	Live birth 1	40+6	3600	Female
31285	4	21.48	Secondary	Female	2	3.58	4.85	11.82	0.73	34.77	8.8	24.1	1	4AB;	Live birth 1	40+6	3400	Female
39248	3	25.33	Primary	Unexplained	1	5.26	12.14	8.26	0.47	26.14	7	29.1	1	4AA;	Live birth 1	40+6	3350	Male
37047	3	21.51	Primary	Both	1	16.54	9.91	6.24	0.3	40.9	9	28.3	1	4AB;	Live birth 1	40+6	3300	Female
33386	1	22.05	Secondary	Female	2	2.51	6.77	13.06	0.81	31.48	8.5	35	1	4BA;	Live birth 1	40+6	3200	Male
32720	4	25	Secondary	PCOS(Female)	1	18.49	5.95	20.95	0.31	42.68	7.2	27.4	1	4BB;	Live birth 1	40+6	3130	Female
35993	1	19.47	Primary	Both	1	5.25	8.15	10.5	0.47	45.12	8.5	33	1	4BB;	Live birth 1	40+6	3000	Female
35393	3	18.83	Primary	Unexplained	1	3.16	6.92	12.06	0.59	56.22	8	23.3	1	4BB;	Live birth 1	40+6	2900	Female
33023	3	19.65	Primary	Both	1	10.26	8.25	17.14	0.45	42.15	8	22	1	4BB;	Live birth 1	40+6	2650	Male
10635	4	17.63	Secondary	Female	2	3.56	7.6	11.71	0.33	45.48	12.3	32.8	1	4AB	Live birth 1	41+1	3650	Female
30716	2	18.43	Secondary	Both	1	5.22	4.45	17.46	1.17	27.44	7.7	28.9	1	5BB;	Live birth 1	41+1	3450	Female
36042	3	20.7	Primary	PCOS(Female)	2	4.12	4.98	11.76	0.21	37.01	8.2	26.6	1	4BA;	Live birth 1	41+1	3450	Male
30337	2	19.63	Primary	Unexplained	1	3.52	6.12	25.86	0.54	43.98	11.2	27.1	1	4BA;	Live birth 1	41+2	3820	Male
30052	1	23.07	Secondary	Female	1	5.26	4.58	8.56	0.45	25.26	11.7	32.4	1	4BB;	Live birth 1	41+2	3550	Female
32514	4	20.72	Primary	Female	1	8.68	10.68	6.8	0.21	52.13	9.8	25.8	1	4BA;	Live birth 1	41+2	3400	Male
34890	3	17.91	Primary	PCOS(Female)	1	2.58	10.25	10.25	0.35	45.17	9	29.6	1	4BB;	Live birth 1	41+2	3350	Female
30587	7	17.72	Primary	Unexplained	1	10.23	5.26	11.12	0.45	25.56	11.5	32.5	1	4BA;	Live birth 1	41+2	3260	Female
33452	3	31.25	Primary	Both	1	2.6	8.18	21.2	0.94	30.23	11	22.9	1	4AB;	Live birth 1	41+3	4000	Male
35578	3	17.99	Primary	Female	1	18.29	6.11	9.53	0.51	43.11	9.5	29.1	1	4BA;	Live birth 1	41+3	3900	Male
33771	4	21.48	Primary	Both	1	4.15	4.86	17.15	0.48	24.22	7	24	1	4BA;	Live birth 1	41+3	3820	Male
34868	5	18.82	Primary	Female	1	4.68	7.51	8.38	0.4	40.62	7.2	33.9	1	4BA;	Live birth 1	41+3	3700	Male
39735	1	17.22	Secondary	Female	1	8.66	6.34	9.9	0.56	41.9	7	31.3	1	4BA;	Live birth 1	41+3	3500	Female
33144	1	21.48	Secondary	Female	1	4.61	7.95	15.82	0.65	40.48	10.6	30.6	1	4BA;	Live birth 1	41+3	3500	Male
34723	2	18.93	Primary	PCOS(Female)	1	4.55	7.24	28.88	0.21	30.65	12	28	1	4BB;	Live birth 1	41+3	3100	Female
29515	1	24.14	Secondary	Female	1	5.67	6.19	13.71	0.56	59	10	26.3	1	4BA;	Live birth 1	41+4	3900	Male	GDM
39764	4	21.45	Primary	Male	1	1.52	5.45	10.18	0.56	42.9	9	28	1	4BB;	Live birth 1	41+4	3750	Male
37528	2	18.03	Secondary	PCOS(Female)	2	15.11	6.7	10.37	0.51	63.07	7	27.7	1	4BB;	Live birth 1	41+4	3300	Female
30222	5	22.19	Secondary	Male	2	5.71	5.78	23.39	0.46	0.47	8.5	31.4	1	4BB;	Live birth 1	41+5	4100	Male
33481	2	17.58	Secondary	Both	1	4.73	7.58	12.63	0.6	66.19	7.5	29.5	1	4BB;	Live birth 1	41+5	3150	Male
27371	1	20.58	Secondary	PCOS(Female)	1	5.44	9.29	13.24	0.45	34.72	9.8	31.5	1	4AA;	Live birth 1	41+5	2350	Male
34159	2	24.2	Secondary	Both	2	4.26	6.99	13.52	0.44	37.54	8.6	31.1	1	4BB;	Live birth 1	41+6	3600	Male
30757	1	29.38	Primary	Both	1	5.28	5.45	18.41	0.56	54.61	8.5	24	1	4BB;	Live birth 1	42+3	3900	Female
31028	2	26.84	Primary	PCOS(Female)	1	2.73	3.64	12.64	0.72	44.61	8	27.6	1	4BB;	24W-miscarriage	宫内感染
31016	7	21.08	Primary	Female	1	3.98	5.61	13.15	0.73	60.19	9.2	25	1	4AB;	13W-miscarriage	胎儿畸形
32492	1	20.83	Primary	Both	1	2.55	4.95	14.27	0.9	36.59	8.3	33.6	1	4AB;	26W-miscarriage	心脏畸形
21385	4	18.36	Primary	Female	2	6.31	6.4	13.54	0.63	70.05	7.2	32.7	1	4BA;	Biochemical pregnancy
21468	7	22.86	Primary	Female	2	1.83	3.48	6.93	0.76	21.1	9.2	32.3	1	4BB;	Biochemical pregnancy
23269	6	21.09	Secondary	Unexplained	1	5	6.06	15.65	0.5	36.03	9	31.9	1	4AB;	Biochemical pregnancy
24581	2	21.5	Secondary	Both	2	5.47	6.57	9.27	0.5	48.1	11	32	1	4BA;	Biochemical pregnancy
24838	2	21.33	Primary	Female	1	4.29	6.78	25.64	0.26	35.26	11	27.6	1	4BB;	Biochemical pregnancy
26022	1	16.82	Secondary	Male	2	6.95	7.59	12.66	0.78	50.95	7.5	29.6	1	4BA;	Biochemical pregnancy
26438	1	17.44	Secondary	Both	2	3.06	10.06	12.11	0.32	46.51	7.5	31.4	1	4BB;	Biochemical pregnancy
28423	7	22.89	Secondary	Female	2	4.73	7.25	14.49	0.56	42.97	9.7	33.7	1	5BB;	Biochemical pregnancy
28917	2	18.73	Primary	PCOS(Female)	1	2.85	5.45	23.29	0.55	27.18	11.7	26	1	4BB;	Biochemical pregnancy
30172	3	22.03	Primary	Female	1	4.41	5.33	8.27	0.53	50.48	9.3	34.4	1	4BA;	Biochemical pregnancy
30368	5	22.89	Secondary	Female	2	2.66	3.97	8.25	0.45	31.73	10	30.4	1	4AB;	Biochemical pregnancy
30469	8	23.59	Secondary	Female	1	2.51	8.21	9.08	0.37	38.54	12	33.9	1	4AA;	Biochemical pregnancy
30726	7	23.42	Secondary	Both	1	3.31	5.74	11.02	0.64	33.54	9.3	32.5	1	4BB;	Biochemical pregnancy
30732	3	22.6	Primary	Female	1	3.7	4.46	18.04	0.72	16.74	9	32	1	4BB;	Biochemical pregnancy
30905	2	23.05	Primary	Male	2	4.11	5.67	11.22	0.8	33.27	11.7	26.3	1	4BB;	Biochemical pregnancy
31042	2	18.59	Primary	Both	1	4.49	5.19	12.55	0.68	61.08	8.6	34.2	1	4BB;	Biochemical pregnancy
31123	1	25.48	Secondary	Male	1	3.55	5.15	14.17	0.45	58.16	9.6	28.7	1	4BB;	Biochemical pregnancy
31414	8	20.4	Secondary	Female	1	9.69	2.67	8.32	0.5	66.43	9.3	32.2	1	4BA;	Biochemical pregnancy
31506	1	20.03	Primary	PCOS(Female)	2	10.25	4.59	8.45	0.42	56.17	8.8	29.9	1	4BB;	Biochemical pregnancy
32059	2	21.1	Secondary	Female	1	5.25	8.23	13.92	0.58	58.27	7	32.2	1	4BB;	Biochemical pregnancy
32089	2	20.31	Primary	PCOS(Female)	2	3.19	8.3	20.82	0.53	49.26	14	34.4	1	4BB;	Biochemical pregnancy
32276	1	17.91	Secondary	Both	2	3.19	4.57	9.72	0.26	48.88	7	23.6	1	4AB;	Biochemical pregnancy
32711	1	18.49	Primary	Female	2	1.68	11.77	11.25	0.96	54.5	8	25.3	1	4AB;	Biochemical pregnancy
32873	4	21.78	Primary	Male	1	3.35	6.22	15.45	0.67	30.56	13.4	25.7	1	4BB;	Biochemical pregnancy
32907	5	23.62	Primary	Female	1	2.39	8.39	8.29	0.42	42.93	11	31.8	1	4BB;	Biochemical pregnancy
33277	2	23.23	Secondary	Both	1	10.26	5.75	8.47	0.49	56.17	8.5	31.8	1	4BA;	Biochemical pregnancy
33298	1	18.29	Primary	Female	1	5.26	8.47	11.15	0.47	52.17	10.5	26.7	1	4AB;	Biochemical pregnancy
33402	3	20.44	Secondary	Female	1	4.66	9.2	8.85	0.29	39.06	8	32.1	1	4BB;	Biochemical pregnancy
33408	1	22.43	Secondary	Male	2	2.98	6.16	11.43	0.59	46.6	8.2	27.9	1	4BA;	Biochemical pregnancy
33487	5	20.13	Secondary	Female	1	6.47	5.89	12.24	0.36	67.72	7	35.2	1	4BB;	Biochemical pregnancy
33546	4	18.36	Primary	PCOS(Female)	1	12.81	9.78	20.87	0.54	28.53	11.4	31	1	4AB;	Biochemical pregnancy
33655	2	19.61	Secondary	Both	2	4.03	3.37	23.37	0.67	39.69	7.5	35	1	4BA;	Biochemical pregnancy
33703	2	26.35	Primary	Both	1	9.29	6.7	12.02	0.7	41.85	8	27.4	1	4AB;	Biochemical pregnancy
33807	2	22.96	Secondary	PCOS(Female)	1	2.79	8.21	0.85	0.55	47.2	11.3	34.8	1	4BB;	Biochemical pregnancy
33847	1	23.62	Secondary	PCOS(Female)	1	1.92	6.43	29.79	0.42	27.92	8	32	1	4AA;	Biochemical pregnancy
33955	4	19.56	Secondary	Both	1	3.05	5.24	14.15	0.4	37.98	10	24.3	1	4BB;	Biochemical pregnancy
34268	2	23.5	Primary	Both	1	3.16	4.95	18.52	0.84	18.66	7.5	35.9	1	4BB;	Biochemical pregnancy
34372	2	20.34	Primary	Male	1	2.8	7.45	21.26	0.76	44.55	8	35.8	1	4AB;	Biochemical pregnancy
34709	2	22.68	Primary	Female	2	2.28	8.96	13.59	0.45	39.68	9.1	28	1	4BB;	Biochemical pregnancy
34963	8	25.97	Secondary	PCOS(Female)	1	2.53	5.53	16.34	0.34	25.46	7.7	33	1	4BB;	Biochemical pregnancy
35358	1	19.92	Secondary	Male	1	3.86	5.41	8.01	0.21	65.76	10.1	24.8	1	4BB;	Biochemical pregnancy
35474	3	21.09	Secondary	Female	2	3.09	6.07	9.31	0.45	20.21	8.9	25.3	1	4BB;	Biochemical pregnancy
35564	1	26.04	Secondary	Both	1	6	7.56	5.36	0.5	48.91	7	31.1	1	4AB;	Biochemical pregnancy
36453	3	16.02	Secondary	Female	1	5.25	10.26	5.17	0.48	56.23	10	31.6	1	4BB;	Biochemical pregnancy
37223	3	23.63	Primary	Both	1	12.22	8.44	8.09	0.36	52.41	10	26.1	1	4BB;	Biochemical pregnancy
37286	2	25.33	Primary	Both	1	4.46	5.62	9.37	0.53	33.26	12.2	34.9	1	4BB;	Biochemical pregnancy
37548	5	21.63	Primary	Unexplained	2	7.15	9.38	11.22	0.62	31.68	11.6	29.4	1	5AB;	Biochemical pregnancy
37884	5	19.4	Secondary	Both	1	5.26	5.6	9.53	0.54	32.95	9	32.4	1	4BB;	Biochemical pregnancy
37961	7	21.3	Secondary	Ems(Female)	2	5.26	7.14	8.95	0.47	16.17	12	34	1	4BB;	Biochemical pregnancy
38632	10	24.03	Secondary	Male	1	6.9	8.09	20.56	0.51	27.37	12	33.6	1	4AB;	Biochemical pregnancy
39972	1	19.38	Primary	Male	1	4.26	8.16	9.5	0.77	43.6	8	24.5	1	4BA;	Biochemical pregnancy
16537	3	21.09	Secondary	Female	2	8	5.35	11.9	0.45	52.8	10	29.5	1	4AB;	NO
18029	8	20.4	Secondary	Female	2	3.65	6.47	7.42	0.4	38.5	7	35.8	1	4AB;	NO
18573	1	18.83	Secondary	Female	2	1.54	3.27	6.29	0.59	50.8	12	33.1	1	4AB;	NO
19519	1	19.47	Secondary	Female	2	4.06	6.54	16.79	1.03	47.35	11	27.8	1	4BB;	NO
25074	1	18.9	Primary	PCOS(Female)	1	8.62	5.26	11.45	0.58	52.14	7	28.4	1	4BA;	NO
25826	4	21.09	Primary	Unexplained	1	2.56	7.04	14.82	0.52	59.35	10.6	25.2	1	4BB;	NO
26487	1	19.68	Secondary	Both	2	6.7	7.09	12.16	0.59	41.8	10	28.7	1	4BB;	NO
27804	1	21.94	Secondary	Female	2	1.67	9.99	16.38	0.57	42.04	8.5	31.5	1	4BA;	NO
28098	5	18.37	Primary	PCOS(Female)	1	10.33	5.05	12.21	0.56	33.04	9	28	1	4BB;	NO
28789	3	17.9	Primary	Unexplained	1	5.26	5.47	10.26	0.48	35.26	9.6	30	1	4BB;	NO
29344	3	18.75	Primary	Unexplained	1	6.56	7.32	18.24	0.28	63.32	7.5	31	1	4BA;	NO
29511	1	25.3	Secondary	Female	2	1.54	3.56	6.82	0.43	50.17	9	26.7	1	4BB;	NO
29551	1	26.03	Secondary	PCOS(Female)	2	4.97	4.3	7.46	0.21	31.28	8	30.8	1	4AB;	NO
29660	2	18.31	Primary	Male	1	5.26	7.89	12.25	0.45	45.15	9.2	30.4	1	4BB;	NO
29773	2	20	Secondary	Female	2	3.48	5.68	23.38	0.4	32.39	10.2	32.7	1	4BB;	NO
30238	2	20.03	Secondary	Female	1	3.21	7.72	6.93	0.51	30.43	9	30.9	1	4BB;	NO
30256	2	19.72	Secondary	Both	2	3.9	7.99	9.86	0.61	48.6	7.8	35.4	1	4BB;	NO
30292	6	17.8	Secondary	Male	2	2.94	6.36	15.03	0.34	60.67	8	34	1	4BA;	NO
30347	3	17.04	Secondary	Female	1	3.71	8.82	10.25	0.47	33.99	7	33.7	1	4AB;	NO
30377	1	15.63	Primary	Female	1	5.26	8.14	12.15	0.47	45.12	10	33.2	1	4BB;	NO
30460	9	21.48	Secondary	Female	2	3.76	5.79	17.29	0.6	66.24	7	31.4	1	4BB;	NO
30525	1	24.22	Secondary	Unexplained	1	4.16	7.32	9.59	0.9	51.74	9	31.3	1	4AB;	NO
30538	5	18.36	Secondary	Female	1	4.98	5.31	13.4	0.98	49.99	7.5	25.4	1	5BA;	NO
30676	2	18.37	Primary	Female	1	4.78	5.59	22.34	0.59	53.44	8.4	28.1	1	4BB;	NO
30730	2	20.94	Primary	PCOS(Female)	1	4.83	5.35	22.86	0.67	34.35	10.1	31.4	1	4BB;	NO
30773	5	25.39	Secondary	Female	2	2.58	5.81	27.68	0.71	37.44	8	31.5	1	4BA;	NO
30855	1	19.83	Primary	Both	1	5.65	11.74	7.08	0.35	17.23	8	35.7	1	4BB;	NO
30933	3	19.29	Primary	Male	1	5.26	4.17	10.25	0.42	25.26	9.9	29	1	4AB;	NO
30999	3	16	Primary	Male	1	4.59	8.11	10.02	0.94	50.8	13.3	35.1	1	4AB;	NO
31034	6	20.2	Secondary	Female	1	2.28	6.39	11.2	0.44	43.19	8	30.3	1	4BB;	NO
31036	1	19.81	Primary	Unexplained	1	4.8	8.57	15.28	0.28	21.86	10.8	28.7	1	4AB;	NO
31077	7	23.44	Secondary	Both	2	11.59	6.8	15.23	0.7	52.75	8.4	28.4	1	4BA;	NO
31160	2	19.88	Secondary	PCOS(Female)	1	4.08	7.36	9.85	0.46	50.27	7.5	34.7	1	4BB;	NO
31331	2	29.3	Secondary	Both	1	5.63	8.68	7.51	0.26	63.12	9.1	27.5	1	4BA;	NO
31357	1	26.04	Secondary	Female	1	3.34	5.89	12.78	0.61	43.19	9.3	31.9	1	5AB;	NO
31404	1	25.2	Primary	PCOS(Female)	1	6.3	4.26	11.33	0.8	48.38	9	26.1	1	5BB;	NO
31410	5	19.53	Secondary	PCOS(Female)	1	5.21	6.76	7.15	0.42	48.23	11	32.6	1	4AB;	NO
31420	3	20.82	Secondary	Female	1	3.43	7.47	16.06	1.1	30.42	8.9	29	1	4BB;	NO
31514	1	20.57	Secondary	Both	1	2.45	7.39	9.62	0.88	28.74	10.2	23.2	1	4BB;	NO
31658	1	22.86	Secondary	Female	1	9.24	5.19	10.02	0.95	48.16	10.5	29	1	4BB;	NO
31708	2	18.43	Primary	Female	1	2.68	2.56	9.82	0.55	49.02	10.5	28.1	1	4AB;	NO
31746	4	25.33	Secondary	Male	2	5.47	8.11	8.55	0.46	50.4	10.5	29.5	1	4BA;	NO
31832	3	24.03	Secondary	Female	2	5.26	4.87	10.23	0.48	51.47	8.5	26.9	1	4BB;	NO
31890	3	19.31	Secondary	Female	2	3.7	6.74	18.13	0.84	37.54	8	29.1	1	4AB;	NO
31893	1	21.16	Secondary	Both	2	5.26	7.89	10.48	0.78	23.45	8.5	27.4	1	4BB;	NO
31904	5	21.88	Primary	Female	1	5.63	2.86	9.15	0.47	46.25	8.1	30.6	1	4BA;	NO
31956	2	22.03	Secondary	Both	1	4.04	5.62	10.2	0.21	39.66	8	27.8	1	4BB;	NO
32026	10	28.44	Secondary	PCOS(Female)	1	3.29	4.2	6.92	0.71	52.58	9.2	31	1	4BB;	NO
32041	3	21.63	Secondary	Female	2	4.99	8.67	14.32	0.43	47.95	9.5	34.7	1	4BB;	NO
32178	1	26.67	Secondary	Both	2	16	6.64	6.58	0.49	53.44	9.6	33.9	1	5BB;	NO
32218	2	21.08	Secondary	Female	1	4.01	7.31	9.71	0.22	66.76	7.1	22.5	1	4BA;	NO
32370	3	27.47	Secondary	PCOS(Female)	2	5.65	4.67	9.32	0.33	71.15	7.3	28.5	1	4AB;	NO
32409	3	21.23	Primary	Both	1	6.81	5.12	20.74	0.83	50.07	9.2	29.7	1	4BA;	NO
32455	2	17.58	Secondary	Female	1	3.88	8.91	5.35	0.31	38.41	8	28.7	1	4AA;	NO
32578	1	20.66	Secondary	PCOS(Female)	1	7.79	8.17	14.31	0.47	39.59	7	29.6	1	4BB;	NO
32721	4	24.03	Secondary	Female	1	4.83	6.66	9.26	0.75	50.3	10.7	26.6	1	4AB;	NO
32772	7	22.89	Primary	Female	1	5.69	8.47	15.14	0.24	47.25	8	24.8	1	4BA;	NO
32859	1	19.56	Secondary	Female	2	2.2	5.36	7.91	0.41	75.8	9	33.7	1	5BB;	NO
33058	3	22.43	Primary	Female	1	7.07	3.87	28.18	0.79	52.3	11.1	27.3	1	4BA;	NO
33085	2	22.77	Secondary	Female	1	4.27	6.84	12.33	0.79	40.72	10	31.5	1	4AB;	NO
33109	4	17.19	Primary	Both	2	19.57	8.32	8.36	0.22	56.05	8	29.7	1	4BB;	NO
33154	3	20.44	Secondary	Male	1	2.08	7.18	10.18	0.67	22.74	8.5	22.1	1	4BB;	NO
33175	1	25.39	Secondary	Female	1	5.26	5.14	10.14	0.45	25.14	8.5	32.7	1	5BA;	NO
33182	5	25.39	Secondary	Both	1	10.25	6.28	8.25	0.47	25.17	7.5	32.1	1	4BB;	NO
33192	1	21.8	Secondary	Unexplained	1	7.74	6.85	11.72	0.38	47.05	8.2	31.9	1	4BA;	NO
33244	2	22.83	Secondary	Unexplained	1	4.96	8.7	12.06	0.32	28.5	8.5	35.2	1	4BB;	NO
33371	6	22.6	Primary	Both	2	1.65	7.47	18.9	0.28	25.24	9.2	34.1	1	4BB;	NO
33400	6	21.09	Secondary	Female	1	6.53	7.7	23.1	0.41	53.68	9	33.4	1	4BB;	NO
33438	3	19.14	Primary	PCOS(Female)	1	5.43	7.24	13.79	0.78	43.85	9	25.9	1	4AA;	NO
33513	6	22.83	Secondary	Both	2	6.96	4.5	11.97	0.61	32.11	12.7	27.4	1	4AB;	NO
33588	2	21.17	Secondary	Female	2	3.19	6.79	9.42	0.41	37.66	7.2	32.6	1	4BA;	NO
33613	6	22.21	Secondary	PCOS(Female)	2	5.26	5.17	10.25	0.47	25.49	7	35.1	1	4BB;	NO
33758	13	25.34	Secondary	Female	1	3.65	9.95	5.95	0.21	46.25	10.6	35.3	1	4BB;	NO
33823	5	20.31	Secondary	Male	1	2.95	8.21	11.98	0.25	31.24	10	27.6	1	4BB;	NO
33842	2	18.59	Secondary	Female	1	10.25	4.85	12.15	0.48	34.15	8	24.2	1	5BB;	NO
33876	7	15.63	Primary	Female	1	6.56	10.6	9.77	0.55	47.29	12.3	27.6	1	4BA;	NO
33983	1	19.63	Secondary	Female	1	4.4	8.59	12.51	0.7	25.14	8	25.9	1	4BA;	NO
34070	6	21.88	Primary	Female	1	3.9	7.29	11.35	0.78	43.61	10	25.3	1	4BB;	NO
34113	1	23.83	Secondary	Female	1	3.45	7.15	7.7	0.31	51.76	7.5	30.8	1	4AB;	NO
34170	6	20.57	Primary	Female	2	2.89	6.57	17.16	0.3	49.02	9	33.5	1	4BB;	NO
34362	3	20.08	Secondary	Female	1	5.05	6.58	8.81	0.84	41.38	8	33.6	1	4AB;	NO
34388	4	25.82	Primary	Female	2	4.01	7.99	6.4	0.4	39.82	9	26.6	1	4BA;	NO
34512	1	21.64	Primary	Female	1	2.22	5.17	10.99	0.76	35.37	10	28.9	1	4BA;	NO
34601	1	21.64	Secondary	Female	1	4.41	5.96	12.98	0.27	54.99	7	33.9	1	4BA;	NO
34623	5	21.88	Primary	Unexplained	1	3.34	5.11	11.3	0.61	41.73	11	30.6	1	4BB;	NO
34635	5	20.03	Primary	Unexplained	2	4.46	5.01	10.88	0.44	29.64	8.9	30.2	1	4BB;	NO
34651	3	19.96	Secondary	Female	2	2.86	5.99	22.42	0.41	39.97	7.5	35.4	1	4AB;	NO
34911	5	17.63	Primary	Male	1	10.25	6.25	10.25	0.47	54.24	8.5	29.9	1	4AB;	NO
34922	8	20.08	Primary	PCOS(Female)	1	2.11	7.6	10.47	0.35	44.25	9.6	28.9	1	4BA;	NO
35202	4	30.22	Primary	Female	1	13.64	7.7	11.91	0.68	68.02	8	32.9	1	4BB;	NO
35394	1	21.23	Secondary	Female	1	4.86	10.44	15.79	0.33	27.28	11	29.5	1	4BB;	NO
35448	6	18.78	Secondary	Unexplained	1	6.49	10.45	10.86	0.31	49.78	10	32.1	1	4BB;	NO
35485	1	20.31	Primary	Female	2	10.25	4.25	20.15	0.56	11.25	10	28.4	1	4BB;	NO
35514	5	16.41	Primary	PCOS(Female)	1	6.01	7.63	10.73	0.92	77.83	10.6	30.2	1	4AA;	NO
35696	1	20.13	Secondary	Female	1	3.24	5.18	5.6	0.51	23.47	8.1	30	1	4BB;	NO
35751	9	21.64	Primary	Female	2	4.84	10.33	27.51	0.36	32.52	8	33.5	1	4BA;	NO
35774	1	20.94	Secondary	Female	1	4.41	4.61	8.67	0.42	41.3	9	30.3	1	4AB;	NO
35941	5	20	Primary	Female	1	5.07	7.11	7.92	0.48	31.44	7	25	1	4BB;	NO
36086	1	15.82	Primary	Ems(Female)	1	2.58	5.26	8.25	0.74	52.14	8.2	25.3	1	4BB;	NO
36094	4	23.44	Secondary	Unexplained	2	21.08	9.24	10.13	0.36	39.28	9	31.8	1	4BB;	NO
36268	7	17.31	Secondary	Both	1	3.43	5.61	19.71	0.53	74.58	8.5	26.3	1	4AB;	NO
36491	5	19.88	Primary	PCOS(Female)	1	10.98	5.47	14.22	0.3	31.09	9	30.7	1	4BA;	NO
36675	3	23.23	Primary	PCOS(Female)	2	5.89	6.15	11.42	0.47	56.25	8.5	30.8	1	4BA;	NO
36700	4	24.17	Primary	Both	2	6.85	8	21.22	0.4	49.63	10	24.1	1	4BB;	NO
36762	2	19.53	Primary	PCOS(Female)	1	9.03	6.67	15.24	0.34	32.63	8.5	25.6	1	4BB;	NO
36778	2	23.23	Secondary	Both	1	9.14	6.65	9.29	0.88	47.2	9.5	27.9	1	4BB;	NO
36821	4	24.84	Secondary	Both	2	9.97	6.56	6.8	0.21	30.45	9.6	28.7	1	4BA;	NO
36941	2	18.73	Primary	Female	1	4.93	11.03	7.37	0.41	38.41	9.5	24.4	1	4BB;	NO
37060	3	23.19	Secondary	Female	1	1.95	9.89	15.33	0.36	37.77	9	32.7	1	4BB;	NO
37067	4	20.44	Secondary	Female	1	2.77	8.42	11.78	0.39	41.94	7	31.7	1	4BB;	NO
37183	1	19.56	Secondary	Female	1	5.04	15.32	5.84	0.21	24.54	8.5	32	1	4BB;	NO
37199	1	23.05	Secondary	Both	1	6.13	6.82	10.89	0.39	29.14	8	32.3	1	4BA;	NO
37254	6	18.65	Primary	PCOS(Female)	1	4.8	4.99	8.34	0.57	37.18	7.5	29.5	1	4BA;	NO
37424	5	25.71	Secondary	Female	1	2.14	8.4	8.7	0.38	39.3	7.4	35.6	1	4BB;	NO
37466	5	18.73	Secondary	Both	2	3.96	9.24	7.67	0.57	60.84	7	34.8	1	4AB;	NO
37479	2	18.66	Secondary	Female	1	3.7	6.94	24.74	0.54	45.29	8	23.3	1	4BB;	NO
37508	2	24.03	Secondary	Both	1	5.16	5.9	6.82	0.45	46.97	12.2	33.7	1	4BB;	NO
37515	2	20.7	Secondary	Female	2	2.65	11.94	3.95	0.62	23.95	10	32.8	1	4AB;	NO
37519	4	22.83	Primary	Both	1	2.98	4.48	10.8	0.36	42.32	10	34.1	1	4AB;	NO
37908	9	22.34	Secondary	Female	1	2.93	6.43	7.07	0.41	49.53	13	34	1	4BB;	NO
37945	7	24.44	Secondary	Both	1	7.49	6.69	11.65	0.9	51.57	8.8	29.7	1	4BA;	NO
38113	6	18.49	Primary	Female	1	7.09	7.24	19.99	0.39	36.18	9.8	29.4	1	4BB;	NO
38164	3	21.83	Primary	Male	2	11.43	9.93	9.81	0.3	30.55	10	30.1	1	4BA;	NO
38212	3	24.44	Primary	Female	1	4.43	6.84	25.98	0.61	39.91	12	27	1	4BB;	NO
38305	2	17.99	Primary	Female	2	11.46	7.44	23.99	0.53	37.8	9	26.2	1	4AB;	NO
38354	3	26.37	Secondary	Both	1	7.31	4.64	7.37	0.45	50.72	8	29.8	1	4AA;	NO
38898	2	23.44	Primary	Unexplained	1	4.19	7.79	12.43	0.54	33.38	8	26.8	1	5BB;	NO
39064	5	29.55	Secondary	Female	1	6.25	5.28	11.25	0.48	35.26	8.3	30	1	4BB;	NO
39377	2	21.23	Secondary	Male	2	4.63	4.65	5.52	0.68	57.61	7	35	1	4BB;	NO
39525	5	18.59	Primary	Unexplained	1	6.41	8.26	15.75	0.64	43.8	8.2	27.9	1	4AB;	NO
39779	8	17.12	Primary	Unexplained	1	15.47	7.94	8.97	0.61	47.29	7.5	31.5	1	4BB;	NO
32117	3	24.46	Primary	Male	1	2.96	5.36	13.38	0.73	27.64	7.8	27	1	4BB;	Ectopic pregnancy
32900	5	26.67	Primary	Female	1	1.91	6.81	8.53	0.68	36.44	7	24.9	1	4AB;	Ectopic pregnancy
37351	5	30.86	Secondary	PCOS(Female)	2	5.41	5.57	6.42	0.39	40.49	10.8	25.5	1	4BB;	Ectopic pregnancy
19521	1	20.81	Secondary	Female	2	4.12	6.44	21.62	0.73	45.1	10.6	31.6	1	4AB;	10W-miscarriage
29992	1	20.32	Secondary	Female	1	6.53	6.85	11.15	0.52	40.02	9	30.5	1	4BB;	10W-miscarriage
35803	5	24.84	Secondary	PCOS(Female)	1	7.01	4.96	17.19	0.38	23.46	8.5	34.5	1	4BB;	10W-miscarriage
28597	7	27.97	Primary	PCOS(Female)	1	3.74	6.46	6.79	0.89	30.49	9.1	35	1	4AB;	11W-miscarriage
31740	2	25.1	Secondary	PCOS(Female)	2	9.12	5.8	6.35	0.69	21.37	12	33.3	1	4BB;	11W-miscarriage
33577	4	16.85	Primary	Both	1	3.5	6.55	11.87	0.86	37.85	10.7	23.9	1	4AB;	11W-miscarriage
35234	5	26.04	Primary	PCOS(Female)	2	9.87	4.74	7.67	0.26	23.41	11.5	31.3	1	4BB;	12W-miscarriage
33360	2	23.63	Secondary	Female	1	2.21	3.68	8.62	0.36	53.81	7.5	31	1	4BB;	12W-miscarriage
32662	1	24.61	Secondary	Both	2	3.64	4.88	13.55	0.35	37.19	8	31	1	4BB;	12W-miscarriage
31705	2	18.29	Primary	Both	1	9.24	5.87	25.53	0.64	28.19	9.4	25.1	1	4BA;	12W-miscarriage
32130	4	32.87	Secondary	Both	1	1.24	2.74	12.51	0.95	48.3	11.6	31.3	1	4BB;	13W-miscarriage
33485	3	23.23	Secondary	Female	1	4.96	7.19	7.21	0.37	32.13	10	27.5	1	4BA;	13W-miscarriage
35516	2	19.91	Primary	Both	1	2.57	11.69	10.77	1.11	48.96	8.7	30.1	1	4BB;	13W-miscarriage
36731	3	17.01	Secondary	PCOS(Female)	1	5.15	8.6	16.49	0.6	53.08	9	24.5	1	4BA;	13W-miscarriage
31750	5	24.17	Primary	PCOS(Female)	1	15.63	6.09	27.54	0.67	39.95	8	29.4	1	4BB;	15W-miscarriage
33213	3	23.5	Primary	Female	1	4.77	5.04	16.07	0.98	61.34	10.3	26.7	1	4BB;	15W-miscarriage
30791	4	24.97	Secondary	PCOS(Female)	1	3.44	3.95	14.28	0.68	51.13	10.3	29.6	1	4BB;	16W-miscarriage
36800	3	23.83	Primary	PCOS(Female)	1	3.79	6.52	14.3	0.53	28.75	12.3	28.7	1	4BB;	16W-miscarriage
33540	5	22.83	Primary	Unexplained	1	1.35	6.74	17.54	0.53	37.64	9	28.5	1	4BB;	20W-miscarriage
38868	2	16.41	Primary	Unexplained	1	6.25	10.26	8.47	0.47	32.35	12.7	31	1	4BB;	20W-miscarriage
32646	4	23.44	Primary	Female	1	6.89	5.11	8.06	1.05	37.61	9.5	30.4	1	4BA;	22W-miscarriage
32920	4	19.53	Primary	PCOS(Female)	1	7.66	5.31	5.51	0.8	43.88	9	30	1	4BB;	22W-miscarriage
35982	4	27.55	Secondary	Both	1	6.62	6.37	9.58	0.28	52.5	10	32.8	1	4AB;	23W-miscarriage
32058	3	28.04	Secondary	PCOS(Female)	2	5.75	5.39	16.19	0.61	66.16	8	29.5	1	4BA;	24W-miscarriage
32136	10	26.37	Primary	PCOS(Female)	1	13.28	3.39	23.55	0.66	52.15	9	31.5	1	4BB;	24W-miscarriage
33622	7	24.56	Secondary	Female	1	4.48	4.96	7.71	0.34	37.36	7.5	26.1	1	4AB;	25W-miscarriage
33150	2	20.61	Secondary	Unexplained	1	2.92	4.68	10.25	0.48	35.27	10	33.8	1	4AA;	26W-miscarriage
31977	16	24.56	Primary	PCOS(Female)	1	6.04	5.36	5.07	0.36	37.01	9.2	35.7	1	4BA;	27W-miscarriage
28515	3	20	Secondary	Female	2	4.04	4.5	10.72	0.88	43.29	7.5	22.2	1	4AB;	6W-miscarriage
29320	3	21.77	Secondary	PCOS(Female)	2	13.02	8.09	11.11	0.21	40.99	10	27.5	1	4BA	6W-miscarriage
36983	3	19.56	Secondary	Unexplained	1	3.29	4.65	13.41	0.41	31.95	10	23.9	1	4BA;	6W-miscarriage
39418	2	20.44	Primary	Female	1	2.56	6.25	14.12	0.47	52.14	9	29.8	1	4BB;	6W-miscarriage
25941	2	22.22	Secondary	Female	2	4.16	9.14	7.1	0.18	57.7	8.5	34.1	1	3BB;	7W-miscarriage
32323	3	22.03	Primary	Both	1	7.46	4.81	17.74	1.02	53.76	10.9	30.5	1	4BB;	7W-miscarriage
32582	3	16.89	Primary	Unexplained	1	4.47	4.32	5.7	0.28	43.28	8.4	22.8	1	4AB;	7W-miscarriage
33334	2	21.88	Primary	Female	1	3.44	5.83	13.64	0.67	29.07	8	29.7	1	4BA;	7W-miscarriage
35283	5	18.73	Primary	Both	1	6.28	4.78	10.25	0.48	52.16	8	30.3	1	4BB;	7W-miscarriage
37378	2	24.84	Secondary	Unexplained	1	3.81	7.6	18.05	0.71	51.76	8	35.2	1	4AB;	7W-miscarriage
27618	10	20.57	Secondary	Female	2	3.27	8.17	9.43	0.39	37.94	8.5	33.7	1	4BB;	8W-miscarriage
29492	1	21.22	Secondary	PCOS(Female)	2	10.34	8.08	8.25	0.45	41.37	8.5	34.9	1	4AA;	8W-miscarriage
30354	6	23.05	Primary	Female	1	6.17	7.6	16.37	0.54	44.43	9.8	33	1	4BB;	8W-miscarriage
30409	1	20.96	Primary	Unexplained	2	5.26	4.26	8.26	0.15	42.15	8.8	31.1	1	4BA;	8W-miscarriage
30570	2	21.19	Primary	PCOS(Female)	2	9.83	4.83	11.25	0.95	52.49	8	28.1	1	4AB;	8W-miscarriage
30616	5	25.22	Secondary	PCOS(Female)	2	4.42	8.59	5.05	0.51	23.08	10	32.1	1	4BB;	8W-miscarriage
30744	2	20.42	Secondary	PCOS(Female)	1	3.03	5.94	10.89	0.71	37.13	7	33.7	1	4BB;	8W-miscarriage
32307	3	23.63	Secondary	Both	1	4.46	7.21	16.89	0.37	30.49	11	32.8	1	4BB;	8W-miscarriage
32828	7	21.33	Primary	Unexplained	1	3.37	6.49	22.33	0.53	52.2	9	33.1	1	4AA;	8W-miscarriage
32883	4	21.81	Secondary	Both	1	12.82	6.9	11.86	0.4	39.91	14	25	1	4BA;	8W-miscarriage
32926	10	24.44	Primary	Both	2	12.97	5.82	8.44	0.64	48.85	10	28	1	4BA;	8W-miscarriage
32929	8	23.18	Secondary	Female	1	4.45	8.76	10.2	0.6	49.42	9	32.5	1	4BB;	8W-miscarriage
33342	1	22.68	Secondary	Female	1	2.86	8.06	7.91	0.58	49.14	8	31.3	1	4BB;	8W-miscarriage
33477	1	17.97	Primary	Ems(Female)	1	2.75	6.24	8.25	0.28	64.8	10.5	31.4	1	4AB;	8W-miscarriage
35856	2	20.34	Secondary	Both	1	3.91	6.61	13.15	0.24	38.34	8.5	35.5	1	4BA;	8W-miscarriage
36190	2	20.96	Primary	Both	1	13.04	6.2	9.63	0.58	47.85	9.4	24.8	1	4BA;	8W-miscarriage
36271	1	20.43	Primary	Both	1	5.65	7.65	13.2	0.47	58.48	14.5	27.7	1	4BA;	8W-miscarriage
36412	6	26.67	Primary	Both	2	6.05	5.02	8.08	0.69	38.45	11.8	28.9	1	4AB;	8W-miscarriage
36559	14	27.06	Primary	Unexplained	2	5.07	4.51	2.76	0.25	22.64	7	34.4	1	4BB;	8W-miscarriage
37663	5	22.03	Primary	Both	1	4.99	7.18	4.65	0.43	30.25	9	30.6	1	4BB;	8W-miscarriage
37916	2	27.01	Primary	Both	1	6.32	7.87	6.2	0.44	33.54	8.5	25.3	1	4BB;	8W-miscarriage
38615	2	18.82	Primary	Male	2	1.66	4.45	9.58	0.5	48.12	8	30.8	1	4BB;	8W-miscarriage
26858	3	17.4	Secondary	Male	2	2.55	2.1	14.85	0.35	27.9	9	29.3	1	4AB	9W-miscarriage
28646	2	19.23	Primary	Male	1	4.3	10.82	10.85	0.24	42.95	8	30.4	1	4AB;	9W-miscarriage
29045	4	29	Secondary	PCOS(Female)	2	5.48	7.73	2.96	0.22	46.08	11.6	34.8	1	4BA;	9W-miscarriage
29709	5	20.43	Secondary	Both	1	2.61	4.91	10.46	0.69	42.01	11	27.2	1	4AB;	9W-miscarriage
30663	4	28.89	Secondary	Unexplained	1	2.93	5.25	9.96	0.21	53.45	8	32	1	4BB;	9W-miscarriage
31207	1	21.5	Secondary	PCOS(Female)	2	11.32	7.9	12.05	0.4	51.43	10.2	27.7	1	4BA;	9W-miscarriage
33383	2	25.81	Secondary	Female	1	6.72	4.69	11.18	0.84	41.56	12.5	24.3	1	4AB;	9W-miscarriage
33677	5	28.3	Secondary	Female	1	5.73	9.34	12.02	0.21	38.68	9.8	27.8	1	4BB;	9W-miscarriage
34336	3	19.07	Secondary	Female	2	3.37	6.88	9.05	0.53	20.16	9.4	32.7	1	4BA;	9W-miscarriage
34649	3	22.03	Primary	Unexplained	1	4.18	7.4	17.47	0.38	38.97	7	31.8	1	4BA;	9W-miscarriage
35708	4	18.82	Secondary	PCOS(Female)	2	6.42	6.96	12.55	0.58	51.31	8.3	27.6	1	4AB;	9W-miscarriage
35789	1	23.44	Primary	Male	1	2.56	6.54	14.25	0.47	52.16	9	26	1	4AB;	9W-miscarriage
36688	11	30.08	Secondary	PCOS(Female)	2	6.65	6.85	10.4	0.77	49.13	11	26.9	1	4BB;	9W-miscarriage
37905	2	19.98	Secondary	Female	1	2.04	7.24	9.28	0.47	52.14	9	35.3	1	4BB;	9W-miscarriage
38636	3	19.14	Primary	Male	1	3.51	6.52	7.46	0.43	23.26	10.6	31.4	1	4BA;	9W-miscarriage
38735	6	16.61	Primary	Unexplained	2	5.91	7.11	7.62	0.21	53.93	9	31.2	1	4AB;	9W-miscarriage

## Sheet: high-quality+poor-quality（B)
ID	Infertility duration	BMI	Infertility type	Cause of infertility	Transplant cycle	LH	FSH	PRL	P	E2	En	Age	the number of transferred blastocysts	blastocyst scoring	pregnancy outcomes	Neonatal birth age	Neonatal birth weight	Neonatal sex ratio	Special case
28153	3	21.93	Primary	PCOS（Female）	2	13.6	6.05	9.26	0.68	65.25	10	30.1	2	4BA;4BC;	Live birth 2	29	530/610	Male/Female	Preterm birth
34254	1	22.27	Secondary	Female	1	6.25	8.47	11.26	0.47	56.23	8	25.1	2	4BB;6BC;	Live birth 2	34	3350/2250	Male/Female	Preterm birth
34763	9	22.83	Secondary	Both	1	3.98	8.03	16.89	0.36	64.38	11	32.3	2	4BB;5BC;	Live birth 1	34	2230	Male	Preterm birth
32648	9	23.11	Primary	Female	2	2.95	6.04	22.96	0.54	45.7	9	32.5	2	4BB;4BC;	Live birth 2	35	2230/2000	Female/Female	Preterm birth
30258	4	22.04	Secondary	Female	2	6.25	4.17	10.25	0.48	25.14	9.1	31.7	2	4BC;4BB;	Live birth 2	35	2100/2300	Male/Male	Preterm birth
29133	1	24.03	Secondary	Both	2	2.89	4.95	15.89	0.4	36.17	7.5	27.7	2	4AB;4CB;	Live birth 2	35	2050/2350	Male/Female	Preterm birth
39531	8	20.93	Primary	Unexplained	1	6.23	5.14	10.25	0.48	25.26	8	27.5	2	3AB;4BC;	Live birth 2	36	2400/2200	Male/Male	Preterm birth
36296	3	21.72	Primary	Both	1	3.42	7.74	19.46	0.45	64.99	9	34.5	2	4BC;4BB;	Live birth 2	36	2120/2150	Female/Female	Preterm birth
29043	2	22.43	Secondary	Female	2	3.59	7.17	11.24	0.54	30.19	7	30.2	2	4BC;4BB;	Live birth 2	37	2250/2750	Male/Female
33334	2	21.88	Secondary	Female	2	3.44	5.83	13.64	0.67	29.07	8	30.1	2	4BB;4BC;	Live birth 2	37	2100/2300	Male/Male
35167	4	23.53	Primary	Unexplained	2	4.51	5.41	9.27	0.37	36.54	14	26.2	2	4BB;4BC;	Live birth 2	38	2950/2350	Male/Female
35723	2	20.2	Primary	Both	1	21.57	6.42	6	0.59	49.68	10.3	24.3	2	4BC;4BB;	Live birth 2	38	2900/3100	Female/Female
33352	1	18.13	Primary	Male	1	3.22	6.65	21.3	0.89	59.21	8	30.9	2	4BC;3BB;	Live birth 2	38	2490/2660	Female/Female
36189	3	22.66	Secondary	Unexplained	1	4.53	6.88	23.07	0.29	31.28	8.5	29.6	2	4BA;5CB;	Live birth 2	38	2350/2350	Male/Male
37858	3	18.73	Secondary	Female	1	4.55	9.13	8.98	0.65	61.34	8.1	29.2	2	4BB;4BC;	Live birth 2	38	2250/2500	Female/Female
32772	7	22.89	Primary	Female	2	6.23	4.78	11.28	0.47	52.16	7.5	25	2	4BA;4CB;	Live birth 1	39	4300	Male	2，1miscarriage
31129	5	28.13	Primary	Female	2	3.68	8.65	9.89	0.46	68.6	11	30.5	2	6BC;4AB;	Live birth 1	39	4100	Male
32991	5	20.7	Secondary	Female	2	6.28	4.71	5.16	0.41	48.16	8.5	32.3	2	4AB;4CB;	Live birth 1	39	3700	Male	2，1miscarriage
31902	2	17.36	Secondary	Female	2	2.39	6.25	10.32	0.7	42.77	7	33.3	2	3BC;4BB;	Live birth 1	39	3600	Male
18942	1	20.7	Secondary	Female	2	3.48	7.58	7.21	0.29	68.41	9.4	33.6	2	5BB;4CB;	Live birth 1	39	3300	Male
32594	3	20.03	Secondary	Unexplained	2	8.28	8.56	12.12	0.7	44.74	10.4	34.3	2	4BB;4BC;	Live birth 1	39	3200	Male
26321	2	19.72	Secondary	Male	2	5.27	9.88	11.39	0.58	70.18	10.9	22.3	2	4BC;4AB;	Live birth 1	39	3100	Male	2-1（tire reduction)
29641	1	20.2	Primary	PCOS（Female）	2	4.64	6.77	11.2	0.57	71.24	10	26.9	2	4BC;4BB;	Live birth 1	39	2950	Female
34772	2	22.83	Secondary	Female	2	7.63	9.68	28.29	0.57	37.27	7.5	32.9	2	4BB;4BC;	Live birth 1	39	2840	Female	2，1miscarriage
31858	4	23.11	Primary	Female	1	2.38	4.33	8.96	0.45	20.45	8.2	32.3	2	4BB;4BC;	Live birth 1	39	2750	Male
37622	1	21.83	Secondary	Male	2	4.12	4.98	7.12	0.33	45.33	8	27.3	2	4BB;4CB;	Live birth 1	40	3850	Male
37083	1	19.14	Secondary	Both	1	21.75	7.25	7.19	0.59	36.06	11.8	29.9	2	4BB;4BC;	Live birth 1	40	3630	Female
37827	6	17.58	Secondary	Both	1	9.47	5.67	11.39	1.09	50.84	8	29.9	2	4BB;4CB;	Live birth 1	40	3600	Female
17444	1	27.82	Secondary	Male	2	2.21	4.54	9.2	0.54	28.9	10	27.2	2	4BC;4AA;	Live birth 1	40	3500	Male
38111	2	17.99	Primary	Both	1	6.32	8.47	8.36	0.52	52.16	9	27.8	2	4AB;4BC;	Live birth 1	40	3250	Male
32764	2	19.53	Primary	Female	2	8.26	5.16	0.45	0.45	25.16	7	33.6	2	4CB;3BB;	Live birth 1	40	3250	Male
34999	1	17.22	Secondary	Unexplained	2	7.35	8.83	10.75	0.43	30.46	7.3	24.4	2	4BB;4BC;	Live birth 1	40	3100	Female
16906	3	18.9	Primary	Female	2	4.53	8.34	6.48	0.2	42	8.5	27.5	2	4BB;4BC;	Live birth 1	41	3650	Male
22581	3	20.57	Secondary	Female	2	3.83	8.26	12.49	0.55	49.62	8	31	2	4CB;4BB;	Live birth 1	41	3500	Male
38506	4	22.48	Primary	Male	2	2.09	9.1	7.08	0.52	52.27	9	26.1	2	4BB;4BC;	Live birth 1	41	3400	Female
23269	5	21.09	Secondary	Unexplained	2	5	6.06	15.65	0.5	36.03	7.2	32	2	4BB;4BC;	Live birth 1	41	3354	Female
34062	3	18.03	Primary	Female	2	8.38	8.61	16.05	0.27	49.29	9	33	2	4BA;4BC;	Live birth 1	41	3000	Female
34631	2	22.27	Secondary	Female	2	4.66	7.12	10.84	0.48	50.92	11	26.5	2	4BB;4CA;	Live birth 1	27+1	1150	Male	Preterm birth
32079	5	20.94	Primary	PCOS（Female）	2	7.89	5.49	11.95	0.49	53.82	9.7	27	2	4BB;4BC;	Live birth 2	27+4	980/1100	Female/Female	Preterm birth
35687	2	23.12	Primary	Unexplained	2	6.26	8.03	11.59	0.21	29.47	9	32.8	2	4BC;4BB;	Live birth 2	28+1	1100/1000	Male/Female	Preterm birth
21272	4	25	Secondary	Female	2	3.37	7.95	15.52	0.49	31.92	10.2	30.8	2	4BB;4BC;	Live birth 2	30+3	1500/1400	Male/Female	Preterm birth
36338	4	23.71	Primary	Male	1	4.27	6.25	9.73	0.31	34.88	8	27.3	2	4BB;4BC;	Live birth 2	30+5	1400/1600	Male/Female	Preterm birth
39401	1	22.77	Secondary	Male	1	6.23	2.52	9.25	0.45	36.14	9	32.6	2	4BB;4BC;	Live birth 1	31+2	1950	Male	2，1miscarriage/Preterm birth
31002	3	18.44	Secondary	Female	2	1.6	5.23	12.78	0.59	39.75	8.4	32.2	2	4BB;4CB;	Live birth 2	32+4	2000/1750	Male/Female	Preterm birth
31420	3	20.82	Secondary	Female	2	3.43	7.27	16.06	1.1	30.42	11	29.1	2	4BB;3BC;	Live birth 2	32+4	1700/1600	Female/Female	Preterm birth
30175	5	20.2	Primary	Both	1	7.05	5.89	18.77	0.86	57.13	9	25.6	2	4BB;4BC;	Live birth 2	32+6	1400/900	Male/Male	Preterm birth(one death)
39441	3	28.35	Secondary	Female	2	4.13	5.73	5.85	0.26	44.66	10	32.9	2	4BB;5CB;	Live birth 1	33+4	1700	Female	Preterm birth/gestational hypertension/2，1miscarriage
32937	5	19.53	Secondary	Female	2	2.83	5.55	5	0.31	52.97	8	35.2	2	4BB;4CB;	Live birth 2	33+5	1700/2100	Male/Female	Preterm birth
37183	1	19.56	Secondary	Both	2	5.04	5.32	5.84	0.21	24.54	9	32.2	2	5BB;4BC;	Live birth 1	33+5	2800	Male	Preterm birth/GDM
38516	5	24.34	Secondary	Female	2	2.37	6.81	10.36	0.49	44.26	9	26.7	2	5BC;4BB;	Live birth 2	34+1	2350/2450	Male/Male	Preterm birth
30415	2	21.79	Secondary	Female	2	5.83	5.23	14.05	0.47	18.18	9.7	26.1	2	5BB;4BC;	Live birth 2	34+2	2300/2200	Female/Female	Preterm birth
38998	2	20.03	Secondary	Unexplained	1	5.05	6.29	7.68	0.29	65.73	7	30.2	2	4BB;5BC;	Live birth 2	34+2	2000/2000	Male/Male	Preterm birth
33027	1	19.14	Secondary	Female	2	3.74	9.01	25.41	0.66	40.35	7.5	29.3	2	4CB;4BB;	Live birth 1	34+3	1750	Female	gestational hypertension/Preterm birth
36908	2	18.67	Secondary	Female	2	7.79	8.27	14.15	0.86	24.58	8.5	30	2	4BC;3BB;	Live birth 2	34+5	2100/1800	Male/Female	Preterm birth
35006	4	24.77	Primary	Both	2	7.8	13.06	13.03	0.29	43.68	9	33.9	2	4BB;4CB;	Live birth 2	34+6	2250/2400	Female/Female	Preterm birth
36434	2	21.45	Primary	Both	1	14.2	6.67	12.39	0.47	71.9	9.6	32.2	2	4BB;4BC;	Live birth 2	35+1	2335/2550	Male/Male	Preterm birth
30114	5	18.75	Secondary	EMS（Female）	1	3.34	6.57	12.21	0.73	41.04	7.2	31.3	2	4BB;4CB;	Live birth 2	35+3	2350/2150	Male/Male	gestational hypertension/Preterm birth
29802	2	18.49	Secondary	Female	2	4.67	9.48	6.46	1.02	48.95	8.5	30	2	6BB;4CB;	Live birth 2	35+3	2250/2650	Male/Male	Preterm birth
39878	4	18.03	Secondary	Male	1	6.34	9.48	24.01	1.05	46.2	8.4	31.9	2	4BB;5BC;	Live birth 2	35+3	2100/2350	Male/Male	Preterm birth
37878	5	20.83	Secondary	Female	2	6.79	9.62	8.38	0.66	45.26	11	32.2	2	4BB;4CB;	Live birth 2	35+4	2450/2400	Female/Female	Preterm birth
36044	1	18.51	Primary	EMS（Female）	2	2.81	4.45	9.63	0.5	74.13	8	30.9	2	4BC;3BB;	Live birth 2	35+5	2550/2500	Female/Female	Preterm birth
31996	2	20.43	Primary	PCOS（Female）	1	6.36	6.72	18.85	0.35	30.85	8.5	28	2	4BC;3BB;	Live birth 2	35+5	2550/2100	Male/Male	Preterm birth
36666	3	27.43	Primary	PCOS（Female）	1	4.9	6.03	4.21	0.39	28.42	9.9	25.5	2	4BB;4CB;	Live birth 2	35+5	2400/2650	Male/Female	Preterm birth
36491	5	19.88	Primary	PCOS（Female）	2	10.98	5.47	14.22	0.3	31.09	8	31.1	2	4BB;3BC;	Live birth 2	35+5	2100/2700	Male/Female	Preterm birth
32566	2	18.59	Secondary	Female	2	4.32	7.2	11.57	0.27	76.01	10	30.4	2	4BC;4BB;	Live birth 2	35+6	2500/2400	Male/Female	Preterm birth
35060	2	21.64	Secondary	Both	2	10.95	5.27	4.64	0.37	50.12	8.5	30	2	4BB;4BC;	Live birth 1	35+6	2400	Female	Preterm birth
32912	5	19.2	Secondary	Female	2	3.82	10.67	17.63	0.53	33.94	9	35.9	2	4BB;4BC;	Live birth 2	36+1	2800/2550	Male/Female	Preterm birth
29457	2	20.57	Secondary	Female	2	6.26	4.56	10.25	0.48	52.16	9	27.3	2	4BB;3BC;	Live birth 2	36+1	2350/2550	Male/Female	Preterm birth
21800	4	18.91	Secondary	EMS（Female）	2	5.16	8.67	21.49	0.55	48.05	12	33.4	2	4BB;4BC;	Live birth 2	36+1	2250/2200	Female/Female	Preterm birth
30898	3	19.95	Primary	PCOS（Female）	1	3.02	6.08	15.96	0.87	35.43	10	26.2	2	6BB;4BC;	Live birth 2	36+2	2500/2400	Male/Male	Preterm birth
28575	3	21.09	Primary	Unexplained	2	2.82	7.12	8.69	0.27	66.93	11	28.8	2	4AC;4AB;	Live birth 2	36+2	2450/2300	Male/Female	Preterm birth
38458	1	25.22	Primary	PCOS（Female）	2	12.25	6.28	11.26	0.57	34.15	8	31.5	2	4BB;4CB;	Live birth 2	36+2	1200/1800	Male/Female	Preterm birth
30855	1	19.83	Primary	Female	2	5.65	17.11	7.08	0.35	17.23	8.5	35.8	2	4BB;4CB;	Live birth 1	36+2	2500	Female	Preterm birth
34370	6	18.73	Primary	Female	2	5.16	9.19	11.94	0.57	51.74	12	29.2	2	4BB;4BC;	Live birth 2	36+3	2700/2500	Male/Female	Preterm birth
35275	1	25.4	Primary	Female	1	2.29	6.71	16.24	0.61	24.56	10.2	35.7	2	4BA;5CB;	Live birth 2	36+4	2500/2400	Male/Female	Preterm birth
38021	1	24.56	Secondary	PCOS（Female）	1	3.39	6.76	9.24	0.6	30.1	9.8	34.8	2	4BC;4BB;	Live birth 2	36+4	2100/2200	Female/Female	Preterm birth
28739	6	22.66	Primary	PCOS（Female）	2	13.78	8.24	10.46	0.6	24.21	12.8	29.5	2	4BB;4BC;	Live birth 2	36+5	3100/2900	Female/Female	Preterm birth
33608	7	20	Secondary	Female	2	2.3	5.79	10.04	0.43	39.67	9.5	34.7	2	4AB;4CB;	Live birth 2	36+5	2900/2600	Male/Female	Preterm birth
38992	1	21.88	Secondary	Unexplained	1	3.28	6.5	15.52	0.62	34.9	9	31.3	2	4BB;4CB;	Live birth 2	36+6	2753/2153	Male/Male	gestational hypertension/Preterm birth
24604	3	23.05	Primary	Female	2	3.79	1.36	25.78	0.61	71.25	10.6	31.9	2	3BB;3CB;	Live birth 2	36+6	2650/2450	Female/Female	Preterm birth/GDM
33672	5	20.31	Primary	EMS（Female）	1	12.21	6.39	5.39	0.36	59.07	11.7	27.7	2	4BB;4BC;	Live birth 2	36+6	2200/2450	Male/Female	Preterm birth
32461	2	21.23	Secondary	Both	1	21.56	7.03	6.36	0.58	57.15	8.4	24.7	2	4BC;3BB;	Live birth 1	36+6	3050	Male	2，1miscarriage/Preterm birth
35782	7	17.97	Secondary	PCOS（Female）	1	11.25	6.28	11.25	0.45	56.14	8.6	29.3	2	4BB;4CB;	Live birth 2	37+1	3100/2500	Male/Female
39021	4	17.47	Primary	Unexplained	2	6.23	5.14	11.15	0.56	48.45	9	26.2	2	4BB;4BC;	Live birth 2	37+1	2950/2800	Male/Male
37156	3	21.37	Secondary	Female	1	5	6.86	19.14	0.72	36.42	8.6	32.4	2	4BB;4CB;	Live birth 2	37+1	2950/2650	Male/Female
18244	7	18.66	Secondary	Female	2	5.89	6.84	9.24	0.66	33.9	10.3	33.5	2	4AB;3BC;	Live birth 2	37+1	2800/2900	Male/Female
35698	2	21.23	Primary	Unexplained	1	2.3	3.04	26.09	0.82	35.87	10.3	30.7	2	4BB;4CB;	Live birth 2	37+1	2800/2750	Female/Female
35514	5	16.41	Primary	PCOS（Female）	2	6.01	7.63	10.73	0.92	77.83	8.5	30.4	2	4BB;4CB;	Live birth 2	37+1	2700/2300	Male/Female
29718	2	22.27	Secondary	Female	2	3.11	8.51	9.53	0.7	59.18	9.4	28.7	2	4BB;4CB;	Live birth 2	37+1	2620/2500	Male/Female
28613	3	22.1	Primary	Female	2	4.86	6.26	8.23	0.4	49.18	10	26.9	2	4CB;4BA;	Live birth 2	37+1	2500/2950	Male/Female
32031	1	20.03	Secondary	Both	1	4.25	5.97	10.17	0.21	55.58	9.8	28.3	2	4BB;4CB;	Live birth 2	37+1	2500/2550	Male/Female
30983	1	18.03	Secondary	Unexplained	1	6.91	9.58	11.28	0.68	52.06	8	29.1	2	4BB;4AC;	Live birth 2	37+1	2440/2710	Male/Female
34406	3	19.14	Primary	Both	2	6.93	6.32	11.23	0.32	48.28	9	28.7	2	4BB;4BC;	Live birth 2	37+1	2350/2400	Female/Female	GDM
30627	1	25.65	Secondary	Both	2	1.93	5.68	8.85	0.7	33.75	10	32.8	2	4BB;4BC;	Live birth 1	37+1	4200	Female
34198	3	28.84	Secondary	Both	1	2.3	8.4	10.27	0.76	54.61	10.2	27.8	2	4BB;4BC;	Live birth 2	37+2	3150/3000	Male/Female
38626	4	22.94	Primary	Female	2	20.47	9.27	11.76	0.58	53.62	9	22.1	2	4BA;3BC;	Live birth 2	37+2	2950/2600	Male/Female
32228	1	20.2	Secondary	Unexplained	2	3.49	6.66	11.63	0.85	39.07	8.4	35.3	2	4BC;4BB;	Live birth 2	37+2	2500/2500	Female/Female
29900	4	16.9	Primary	Unexplained	2	5.21	8.76	15.01	0.47	56.18	7.1	28.9	2	4CB;4BB;	Live birth 2	37+2	2300/2350	Male/Female
34564	7	22.04	Secondary	Both	1	8.33	6.22	15.17	0.38	42.79	8.5	31.4	2	3BC;4BB;	Live birth 2	37+3	3150/2550	Male/Female
34311	2	19.81	Primary	Female	1	5.29	5.99	13.26	0.75	45.96	9.2	27.5	2	4AB;4BC;	Live birth 2	37+3	2700/2750	Female/Female
26700	3	23.23	Primary	PCOS（Female）	1	10.46	6.01	12.25	0.8	61.24	9	30.3	2	4BB;4BC;	Live birth 2	37+3	2650/2900	Male/Female
29919	2	19.3	Secondary	EMS（Female）	2	3.57	9.32	7	0.55	48.52	8	30.9	2	3BC;4BB;	Live birth 2	37+3	2650/2400	Male/Female
34923	2	24.14	Primary	Female	2	2.37	6	9.88	0.27	30.82	9	28.8	2	4BB;4CB;	Live birth 1	37+3	2900	Female
37729	2	21.1	Secondary	Both	2	10.23	5.26	11.25	0.48	26.25	7.5	27.8	2	4BB;4CB;	Live birth 1	37+3	2550	Female
29843	6	22.03	Secondary	Unexplained	2	4.23	5.41	21.77	1.05	43.02	8.5	33.4	2	4CA;5BB;	Live birth 2	37+4	2400/2600	Female/Female
26389	4	21.64	Secondary	Female	2	1.59	6.14	14.75	0.36	40.57	8	35.9	2	4AC;4BB;	Live birth 1	37+4	2900	Female
29297	2	22.22	Primary	Female	2	4.81	2.98	10.74	0.25	16.2	8.5	35.9	2	4BB;4BC;	Live birth 1	37+4	2900	Male
35685	2	26.35	Primary	Both	2	7.87	6.4	12.12	0.25	25.26	9	31.6	2	4AB;4BC;	Live birth 1	37+4	2800	Female
31904	5	21.22	Primary	Female	2	3.15	8.09	16.03	0.34	48.81	8.2	31.2	2	4BB;4CB;	Live birth 1	37+4	2700	Female
30328	2	20.13	Primary	Female	1	3.32	8.49	18.67	0.44	44.76	8	27.2	2	4BB;3BC;	Live birth 2	37+5	2800/2800	Male/Female
38511	2	23.23	Secondary	Female	2	6.25	5.14	11.23	0.58	25.16	10.4	30.2	2	4AB;4BC;	Live birth 2	37+5	2700/2700	Female/Female
37345	1	19.23	Primary	Unexplained	2	2.21	6.85	8.21	0.21	35.54	11.2	25.8	2	4AB;4AC;	Live birth 1	37+5	3300	Male
37442	1	20.55	Secondary	Unexplained	2	2.53	6.26	8.5	0.57	61.26	7	26.9	2	4BB;5CB;	Live birth 1	37+5	3050	Female
29346	2	21.1	Secondary	Female	1	4.23	6.79	11.36	0.32	28.76	8.1	32.2	2	4BB;4BC;	Live birth 2	37+6	2900/2750	Female/Female
30937	4	20.81	Secondary	Female	2	5.29	7.41	25.44	0.29	38.52	7.5	25.3	2	4BB;4CB;	Live birth 2	37+6	2350/2600	Male/Female
35469	5	22.27	Secondary	Female	2	5.26	6.23	11.25	0.45	45.12	8	33.6	2	6CB;4BB;	Live birth 1	37+6	3250	Female
31672	6	21.72	Secondary	Female	1	4.57	6.89	17.26	0.61	49.3	13	28.4	2	4CB;4BB;	Live birth 2	38+1	2650/2800	Male/Female
36389	1	20.03	Secondary	Unexplained	1	3.21	7.23	10.69	0.89	44.64	12	36	2	4BB;4CB;	Live birth 1	38+1	3000	Male	2，1miscarriage
39361	1	24.84	Secondary	Male	1	2.82	6.4	5.74	0.21	50.74	9	34.7	2	4CB;3BB;	Live birth 2	38+2	2750/2800	Male/Female
34073	1	17.9	Secondary	Female	2	5.48	7.12	22.78	0.77	34.61	8	35.9	2	4BB;4CB;	Live birth 2	38+2	2650/2450	Male/Female
25881	3	24.03	Secondary	Female	2	4.31	6.65	19.12	0.74	46.4	7.4	32.6	2	4BB;4BC;	Live birth 1	38+2	3400	Male
38012	7	20.08	Secondary	Female	2	4.64	15.83	24.56	0.49	46.32	8	28.6	2	5BC;4BB;	Live birth 1	38+2	3250	Male
35506	4	26.95	Primary	PCOS（Female）	2	3.29	5.92	9.42	0.59	29.33	10	25.5	2	5BB;4CB;	Live birth 1	38+2	3200	Female
24683	3	21.1	Secondary	Female	2	4.96	11.16	22.27	1.13	39.55	10	32.6	2	4BB;3BC;	Live birth 1	38+2	3000	Female
37316	2	22.21	Secondary	Female	2	3.16	6.23	12.13	0.35	41.47	8.4	34	2	4CB;4BB;	Live birth 1	38+2	2900	Female	2，1miscarriage
33123	7	26.95	Primary	Both	2	3.11	7.06	16.1	0.47	46.39	12	31.7	2	4BB;4BC;	Live birth 2	38+3	3150/3250	Male/Female
33497	8	21.23	Primary	Male	2	4.54	9.14	16	0.49	48.35	10	29.1	2	4BC;4BB;	Live birth 2	38+3	3100/2300	Female/Female
31554	1	30.86	Secondary	Both	2	4.53	3.82	11.85	0.21	40.11	12.9	24.4	2	4BB;4CB;	Live birth 1	38+3	3900	Male	2，1miscarriage
32307	3	23.63	Secondary	Both	2	4.46	7.21	16.89	0.37	30.49	9	33.3	2	4BB;4CB;	Live birth 1	38+3	3550	Female	2，1miscarriage
32687	3	21.78	Secondary	Unexplained	2	5.78	10.79	10.8	0.36	54.69	10.4	30.7	2	4BB;4BC;	Live birth 1	38+3	3300	Male
31912	1	21.45	Primary	Unexplained	1	2.74	10.12	27.83	0.17	65.71	10.7	26.6	2	4BC;4BB;	Live birth 1	38+3	3200	Male	2，1miscarriage
36703	1	22.31	Primary	Unexplained	2	4.11	6.2	18.9	0.49	31.03	10	26	2	4BB;4BC;	Live birth 1	38+3	3100	Female
34458	3	18.82	Primary	Male	1	6.2	5.14	8.47	0.45	26.15	11	27.3	2	4BB;4BC;	Live birth 1	38+4	3650	Male	2，1miscarriage
29890	1	24.44	Secondary	Female	2	6.28	11.25	8.95	0.47	26.48	12	28.4	2	4BB;4BC;	Live birth 1	38+4	3400	Female
35396	7	18	Primary	PCOS（Female）	1	11.25	5.26	9.14	0.47	25.16	9	26.5	2	3CB;4BB;	Live birth 1	38+4	3400	Male
37746	2	25.78	Secondary	Female	1	5.12	6.17	7.25	0.58	77.79	8	29.1	2	5CB;4BB;	Live birth 1	38+4	3100	Female
38092	2	20.28	Primary	Both	1	9.41	9.33	8.39	0.67	39.48	12	28.9	2	4BB;4BC;	Live birth 2	38+5	3100/2350	Male/Female
37323	4	22.22	Primary	Unexplained	2	3.54	6.31	8.73	0.7	27.5	9	31.1	2	4BB;4CB;	Live birth 2	38+5	2350/2250	Male/Male
36197	1	20.96	Secondary	Both	1	3.09	5.44	5.03	0.91	74	9.5	30.7	2	4BB;4BC;	Live birth 1	38+5	3250	Male
29891	9	17.91	Secondary	Female	1	6.18	7.45	11.26	0.47	51.23	10.4	28.3	2	4AB;5BC;	Live birth 1	38+5	2900	Female
33440	2	19.14	Primary	Both	1	3.58	5.76	23.63	0.58	58.41	8.9	29.1	2	4CB;5BB;	Live birth 2	38+6	2900/2970	Male/Female
37057	2	27.55	Secondary	Both	2	8.03	5.13	7.21	0.31	28.34	7	31.7	2	4BB;4CA;	Live birth 1	38+6	4100	Male
32082	3	18.75	Primary	Both	1	3.11	6.88	12.64	0.53	43.8	9	32.1	2	4BB;4BC;	Live birth 1	38+6	3820	Male
34509	4	20.2	Secondary	Both	2	3.42	7.22	9.57	0.44	44	11	27.7	2	4BB;4BC;	Live birth 1	38+6	3750	Male
39549	4	20.7	Secondary	Female	2	8.55	4.49	11.27	0.56	42.8	8.5	35.6	2	5BB;4BC;	Live birth 1	38+6	3700	Female
31862	7	19.92	Primary	Female	2	3.71	6.41	27.6	0.61	43.01	10.2	34	2	4BB;4CB;	Live birth 1	38+6	3700	Male
37135	7	29.24	Secondary	PCOS（Female）	1	3.64	5.76	8.01	0.3	57.32	7.8	33.1	2	4BB;4BC;	Live birth 1	38+6	3450	Male	2-1（tire reduction)
38134	2	21.48	Primary	Both	1	8.33	4.92	12.41	0.52	49.51	13	27.4	2	4BB;4BC;	Live birth 1	38+6	3300	Female
34981	1	20.83	Secondary	Male	2	6.34	5.41	10.56	0.21	61.43	8.6	33.8	2	4AB;4BC;	Live birth 1	38+6	3200	Female	2，1miscarriage
36120	2	18.37	Primary	Unexplained	2	6.23	5.24	8.56	0.47	26.14	8.5	25.9	2	4BB;4BC;	Live birth 1	38+6	3150	Female	GDM
37646	1	22.31	Secondary	Female	1	3.69	5.98	8.26	0.36	46.22	9.5	31.2	2	3CB;4BB;	Live birth 1	38+6	3050	Female
35353	8	21.08	Primary	Male	1	3.26	6.28	11.48	0.77	52.27	8.6	30.2	2	4CB;3BB;	Live birth 1	38+6	3050	Male
32115	2	17.01	Secondary	Both	2	6.23	5.14	11.25	0.47	58.24	11.1	28.4	2	4BB;4CB;	Live birth 1	38+6	2850	Female	2-1（tire reduction)
37123	5	18.07	Primary	PCOS（Female）	1	6.16	6.97	16.03	0.69	27.12	7.5	27.6	2	4BC;4BB;	Live birth 1	38+6	2800	Female
32550	4	21.5	Primary	Unexplained	2	11.97	8.27	9.28	0.51	37.37	7.5	26.6	2	4AB;4BC;	Live birth 1	38+6	2600	Female
39257	2	24.97	Primary	Both	2	7.77	7.32	15.09	0.21	31.26	8.7	26.4	2	4BB;5CB;	Live birth 1	38+6	2600	Female
39269	7	17.63	Primary	Both	1	3.8	6.1	12.91	0.51	51.62	8	28.4	2	4BB;4BC;	Live birth 2	39+1	2500/2350	Female/Female
35224	3	25.22	Primary	PCOS（Female）	2	5.03	4.22	12.37	0.37	62.8	12.1	29.6	2	4BC;4BB;	Live birth 1	39+1	4500	Male	2，1miscarriage
22278	1	19.33	Secondary	Female	2	4.36	7.4	10.64	0.28	30.33	8	32.8	2	4CB;4BB;	Live birth 1	39+1	3400	Female
31586	2	18.9	Secondary	Female	1	2.26	5.85	8.82	0.66	36.04	10	32.5	2	4BC;3BB;	Live birth 1	39+1	3400	Male
29809	2	27.34	Secondary	Both	2	5.26	3.26	11.25	0.47	45.12	11	25.3	2	4BC;4BB;	Live birth 1	39+1	3300	Male	2，1miscarriage
39067	1	27.64	Secondary	Female	1	2.84	4.51	8.41	0.42	47.26	8.5	35.5	2	4BC;5BB;	Live birth 1	39+1	3300	Female
36680	4	19.63	Secondary	Both	2	4.21	7.47	8.86	0.49	42.18	9	27.2	2	4BB;4BC;	Live birth 1	39+1	2900	Female
37128	2	21.23	Secondary	Female	2	4.76	8.5	8.23	0.63	28.61	8	33.8	2	4BB;4BC;	Live birth 2	39+2	2950/2650	Male/Female
34165	1	21.63	Secondary	EMS（Female）	2	4.48	7.36	17.6	0.36	55.02	9	31.5	2	4BB;4BC;	Live birth 1	39+2	3930	Male
33251	3	20.28	Primary	Female	2	4.76	7.96	11.27	0.34	44.17	10	28	2	4BC;3BB;	Live birth 1	39+2	3830	Male
34765	4	19.07	Secondary	Female	2	6.48	6.28	13.27	0.79	48.52	7	34.4	2	4AC;3BB;	Live birth 1	39+2	3700	Female
32955	1	20.2	Secondary	Unexplained	2	3.21	7.24	27.54	0.27	67.67	11	30.5	2	4BB;4CB;	Live birth 1	39+2	3700	Male
39258	4	20.81	Primary	Unexplained	2	5.11	5.74	15.48	0.53	41.15	10	32.1	2	4BB;4CB;	Live birth 1	39+2	3450	Male
33603	9	25.22	Secondary	PCOS（Female）	1	6.23	5.47	11.25	0.48	56.26	11	31	2	4BB;4BC;	Live birth 1	39+2	3100	Male
33296	9	29.33	Primary	Female	2	1.38	12.21	16.52	0.3	48.5	8	35.6	2	4BB;4BC;	Live birth 1	39+2	3000	Female
34542	4	19.68	Secondary	Unexplained	1	6.23	12.15	14.15	0.47	23.25	10	35.8	2	4BB;4BC;	Live birth 1	39+2	3000	Female
38519	1	19.63	Secondary	Female	2	5.09	19.1	12.33	0.58	32.09	8.9	31.7	2	3CA;4BB;	Live birth 1	39+2	2700	Female
32774	4	19.65	Primary	Both	1	4.85	7.27	18.27	0.27	52.88	11.2	30.1	2	4BB;4BC;	Live birth 1	39+3	4100	Male
28184	2	26.13	Secondary	Both	2	2.86	5.93	12.22	0.73	32.41	10.7	26.1	2	4BC;4BB;	Live birth 1	39+3	3560	Male
35491	3	21.77	Primary	Both	2	6.25	3.25	9.14	0.47	63.12	12	31.2	2	4BC;4BB;	Live birth 1	39+3	3450	Female
39444	5	21.56	Secondary	Unexplained	1	5.53	3.05	8.42	0.48	45.19	7.5	34.6	2	4BB;3CB;	Live birth 1	39+3	3450	Male
33087	2	18.07	Secondary	Both	2	2.64	7.51	25.66	0.74	72.59	8	32.1	2	3CB;4BB;	Live birth 1	39+3	3400	Female
29288	7	25.4	Primary	Unexplained	1	6.3	7.77	6.29	0.64	49.64	9	26.9	2	4BB;6CB;	Live birth 1	39+3	3300	Female
39308	2	18.75	Primary	PCOS（Female）	1	10.25	5.26	11.29	0.48	57.14	9	29	2	4BB;5BC;	Live birth 1	39+3	3300	Male
22526	6	19.84	Secondary	Male	2	6.64	9.06	8.56	0.67	45.43	9	29.5	2	3BC;4BB;	Live birth 1	39+3	3250	Male
37519	2	22.83	Primary	Both	2	2.98	4.48	10.8	0.36	42.32	9.7	34.1	2	4BB;4CB;	Live birth 1	39+3	3210	Male	Birth defect
34321	1	21.64	Secondary	Female	2	1.8	7.63	13.33	0.25	48.53	7.5	34.6	2	6BB;4CA;	Live birth 1	39+3	3000	Female	2，1miscarriage
31219	1	20.96	Secondary	PCOS（Female）	1	3.86	6.47	14.9	0.51	43.89	9.7	22.8	2	4BA;4BC;	Live birth 1	39+3	2700	Female	2，1miscarriage
32243	1	27.34	Secondary	Female	1	2.17	6.96	11.07	0.44	31.26	9.4	27.6	2	4BB;4CB;	Live birth 1	39+4	4100	Female
38040	2	22.64	Primary	PCOS（Female）	1	12.09	8.65	11.04	1.04	40.94	8.5	27.1	2	4BA;4CB;	Live birth 1	39+4	3750	Male
32393	2	21.09	Secondary	Male	2	4.06	6.25	11.37	0.51	49.63	9.5	30.5	2	4BB;4BC;	Live birth 1	39+4	3350	Female
34582	1	25.22	Secondary	Female	2	2.35	6.62	13.6	0.48	34.95	7	35.1	2	4BB;4BC;	Live birth 1	39+4	3200	Male	Birth defect
36271	1	20.43	Secondary	Both	2	5.65	7.65	22.2	0.47	28.48	9	28.1	2	4BB;4CB;	Live birth 1	39+4	3100	Female
37800	4	19.3	Primary	PCOS（Female）	1	10.08	7.74	9.47	0.34	72.96	9	33	2	4BB;5CB;	Live birth 1	39+4	2800	Female
27980	2	24.65	Primary	Male	1	2.61	5.84	11.53	0.54	29.76	12.3	26.4	2	4BB;4AC;	Live birth 2	39+5	2100/2250	Female/Female
37082	1	19.43	Primary	Unexplained	2	6.23	8.47	11.26	0.45	26.28	11	31.6	2	4BB;4CB;	Live birth 1	39+5	4110	Male
16082	3	24.22	Secondary	PCOS（Female）	2	12.2	6.94	6.13	0.2	48.4	13.5	33.9	2	4BA;4BC;	Live birth 1	39+5	3980	Female
34209	4	20.83	Primary	Unexplained	2	5.07	7.77	25.54	0.28	30.5	7.8	25.9	2	4BB;4BC;	Live birth 1	39+5	3950	Female
32259	6	18.65	Primary	Female	1	6.38	7.55	12.79	0.84	28.8	8.5	29	2	4BB;4BC;	Live birth 1	39+5	3550	Female	GDM
34784	5	19.25	Primary	Unexplained	2	4.04	5.65	6.27	0.7	36.34	10	32.1	2	4BC;4BB;	Live birth 1	39+5	3400	Male	2，1miscarriage
33851	2	19.81	Primary	Female	1	3.45	7.83	8.88	0.63	68.12	9	32.8	2	4BB;4CB;	Live birth 1	39+5	3300	Male
36202	1	20.83	Primary	Male	2	3.87	6.24	8.87	0.41	49.54	7.8	31	2	4BB;4BC;	Live birth 1	39+5	3200	Female
38540	3	21.76	Primary	PCOS（Female）	2	4.73	8.59	20.35	0.41	40.75	10	31.2	2	4BB;4BC;	Live birth 1	39+6	4050	Male
28206	5	22.43	Secondary	Female	1	6.25	7.45	11.29	0.48	45.11	8	27.4	2	4CB;3BB;	Live birth 1	39+6	4000	Female	2，1miscarriage
37709	3	19.1	Secondary	Female	1	3.34	5.82	28.45	0.51	29.96	10	30.2	2	4BB;4CA;	Live birth 1	39+6	3800	Female	2，1miscarriage
37813	2	21.09	Primary	Unexplained	2	4.21	6.61	19.89	0.32	34.32	8.4	35.4	2	4BB;4BC;	Live birth 1	39+6	3200	Male
32723	3	20.78	Secondary	Female	1	3.31	6.02	9.46	0.77	36.03	8.3	31.4	2	4CA;4BB;	Live birth 1	39+6	3150	Female
27691	1	20.83	Secondary	Both	2	4.79	8.82	29.1	0.46	42.22	7	26.9	2	4BB;4BC;	Live birth 1	40+1	4000	Male	2-1（tire reduction)
25471	8	20.13	Secondary	Both	2	3.37	10.86	4.89	0.48	42.7	9.5	32	2	3BB;3BC;	Live birth 1	40+1	3800	Male
37089	2	21.48	Secondary	Female	2	4.72	7.19	17.15	0.5	31.38	9	26.5	2	4BB;4CA;	Live birth 1	40+1	3700	Male
34807	2	22.05	Primary	Unexplained	1	2.52	7.08	8.29	0.43	58.54	7.5	27.9	2	4BB;4BC;	Live birth 1	40+1	3500	Male	2，1miscarriage
31457	2	20.17	Secondary	Female	2	5.74	9.11	8.79	0.55	39.3	10	22.1	2	4BB;4BC;	Live birth 1	40+1	3220	Female
31429	1	16.8	Secondary	Female	1	5.26	6.14	10.25	0.48	25.14	7	32.1	2	5BB;4CB;	Live birth 1	40+1	3060	Male
33624	7	27.06	Secondary	Female	2	5.18	8.46	10.46	0.25	34.62	9.2	33.8	2	4BB;4CB;	Live birth 1	40+1	2900	Female
30545	6	23.44	Primary	Both	2	10.07	7.44	11.6	0.55	35.22	12.4	30.7	2	4BB;3BC;	Live birth 1	40+2	4250	Female	GDM/2，1miscarriage
37268	2	21.64	Secondary	Both	1	6.48	7.04	5.2	0.57	39.56	8	23.3	2	4BB;3BC;	Live birth 1	40+2	3900	Female
31355	3	17.69	Secondary	Unexplained	2	6.25	3.14	11.25	0.48	47.25	8	24.1	2	4BC;4BB;	Live birth 1	40+2	3900	Male
35446	2	18.37	Primary	PCOS（Female）	2	6.36	7.58	12.47	0.99	71.79	9	27.1	2	4AB;4BC;	Live birth 1	40+2	3580	Male
36511	5	18.67	Secondary	Unexplained	2	2.07	5.77	10.33	0.5	68.87	8.5	23.3	2	4BB;4CB;	Live birth 1	40+2	3500	Male
31493	6	19.1	Primary	Female	1	7.79	6.09	11.51	1.01	33.29	7.5	26.6	2	4BB;4CB;	Live birth 1	40+2	3400	Female
36284	3	21.41	Primary	Female	2	4.46	5.67	6.37	0.35	76.44	8	28.5	2	4BC;4BB;	Live birth 1	40+2	3300	Male	2-1（tire reduction)
31292	4	19.47	Secondary	Both	1	4.83	6.73	10.33	0.48	39.61	10.7	30.2	2	6BC;4BB;	Live birth 1	40+2	3250	Female	2，1miscarriage
33657	2	19.07	Primary	Unexplained	2	6.25	4.78	11.25	0.15	25.12	7	31.4	2	4AB;4CB;	Live birth 1	40+2	3140	Female
36662	2	16.94	Primary	Both	1	5.01	6.29	20.32	0.36	42.2	7	28.2	2	5BB;4CB;	Live birth 1	40+3	3750	Female
38306	4	17.63	Primary	PCOS（Female）	2	10.26	5.17	9.14	0.48	36.17	8.5	31.8	2	4BB;4CB;	Live birth 1	40+3	3700	Male
38052	2	18.9	Primary	Female	2	3.87	6.86	19.92	0.81	60.18	10.8	29.9	2	4BB;4CB;	Live birth 1	40+3	3600	Female
36709	1	18.67	Primary	PCOS（Female）	1	7.14	6.12	11.41	0.45	59.24	9	26.7	2	4BC;4BB;	Live birth 1	40+3	3500	Female
37037	2	16.94	Secondary	Male	1	4.57	5.64	29.08	0.38	50.66	9.2	30.9	2	4BB;4BC;	Live birth 1	40+3	3450	Female
37226	2	28.13	Secondary	Both	2	8.91	6.22	11.69	0.67	56.95	9	30.7	2	4BB;4BC;	Live birth 1	40+3	3400	Male
32500	2	17.69	Primary	Unexplained	1	4.61	7.34	11.46	0.61	61.01	8	25.8	2	4BB;4BC;	Live birth 1	40+3	3350	Female
33980	1	19.81	Secondary	Both	2	2.78	9.56	2.63	0.74	25.78	13	34.1	2	4BC;5BB;	Live birth 1	40+3	3200	Female
33325	3	24.97	Primary	PCOS（Female）	1	2.66	4.25	21.07	0.72	49.09	10	29.1	2	4BB;4CB;	Live birth 1	40+3	3100	Female
33666	3	18.31	Primary	Both	2	5.44	9.99	27.24	0.55	41.11	9	33.5	2	4BB;4CB;	Live birth 1	40+3	2970	Female
35212	1	21.67	Primary	EMS（Female）	2	6.23	5.47	11.25	0.48	52.15	9.5	33.2	2	4BB;4BC;	Live birth 1	40+3	2940	Male
25581	1	18.44	Secondary	Female	2	7.35	3.8	6.88	0.98	16.27	10	28.3	2	4BB;4CB;	Live birth 1	40+4	4100	Male
31591	8	23.83	Secondary	Both	2	3.2	6.48	16.15	0.49	28.71	9	28	2	4CB;4BB;	Live birth 1	40+4	3800	Female	2，1miscarriage/Birth defect
26294	4	22.58	Primary	EMS（Female）	1	4.31	7.36	12.26	0.45	46.64	8	29.3	2	4BB;4BC;	Live birth 1	40+4	3650	Male
39121	3	22.03	Secondary	Male	2	2.74	4.27	13.28	0.56	43.08	7.5	25.6	2	4BC;4BB;	Live birth 1	40+4	3350	Female
37696	5	15.23	Secondary	Female	2	6.19	8.6	10.29	0.68	63.29	7	31.2	2	4BB;4BC;	Live birth 1	40+4	2900	Male	2，1miscarriage
36545	6	20.43	Secondary	Female	2	4.16	5.8	6.79	0.21	60.75	8	33.6	2	4AB;4BC;	Live birth 1	40+5	4250	Male
34237	5	17.58	Primary	Unexplained	1	5.14	10.73	21.46	0.45	70.63	11	30.2	2	4BB;4BC;	Live birth 1	40+5	3500	Female	2，1miscarriage
33634	1	21.48	Secondary	Both	1	2.58	11.64	8.37	0.34	73.31	7	30.6	2	4CB;4BA;	Live birth 1	40+5	3500	Female
33727	7	18.22	Primary	Both	1	12.9	10.52	8.9	0.57	36.31	8.4	31.2	2	4BB;4CB;	Live birth 1	40+5	3500	Male
31396	4	21.83	Primary	Female	1	6.12	6.5	8.8	0.24	43.43	8.5	28.4	2	6BC;3BB;	Live birth 1	40+5	3400	Male
31346	1	22.03	Primary	PCOS（Female）	1	5.34	7.15	14.29	0.57	54.88	8.5	28.1	2	4BB;4BC;	Live birth 1	40+6	3950	Male
33042	2	17.93	Secondary	Both	2	2.79	7.5	4.91	0.46	38.49	8	30.6	2	4BB;3BC;	Live birth 1	40+6	3150	Female
33041	3	25.64	Secondary	Female	2	2.95	6.99	9.37	0.24	34.14	8.1	26.2	2	4BB;4BC;	Live birth 2	41+1	2850/2550	Male/Male
31471	2	22.38	Primary	Female	1	6.23	4.17	10.25	0.48	26.25	8	31.4	2	4BB;4BC;	Live birth 1	41+1	3800	Female
34681	1	22.2	Secondary	Female	2	2.31	8.21	17.68	0.27	27.26	7.5	26.4	2	4BC;4BB;	Live birth 1	41+1	3700	Female
34332	6	28.37	Primary	Female	1	2.49	5.6	6.76	0.54	16.23	9.2	31.2	2	4CB;6BB;	Live birth 1	41+1	3600	Male
31289	6	24.46	Secondary	EMS（Female）	2	3.35	4.8	10.47	0.21	49.33	7	26.3	2	4BB;4CB;	Live birth 1	41+1	3150	Male	Birth defect
36636	5	22.04	Primary	PCOS（Female）	2	4.87	9.73	10.89	0.74	25.4	11	26.1	2	4CB;4BB;	Live birth 1	41+2	4000	Male
35955	1	18.22	Secondary	Both	2	6.25	4.78	8.56	0.54	22.56	8.6	26.8	2	4BB;4BC;	Live birth 1	41+2	3850	Female
31313	4	26.04	Primary	Male	1	1.58	7.99	16.12	0.52	48.16	12.2	28	2	4AB;4BC;	Live birth 1	41+2	3800	Male	2，1miscarriage
30987	1	21.48	Secondary	Female	2	4.73	5.75	12.13	1.03	32.1	8	31.8	2	4BB;4BC;	Live birth 1	41+3	3090	Female	2，1miscarriage
37151	2	17.69	Secondary	Female	2	3.21	4.97	9.75	0.62	21.46	9	35.7	2	4BB;4CB;	Live birth 1	41+4	3500	Female
28306	1	20.89	Secondary	Female	2	2.73	8.06	8.48	0.55	49.99	10	31.5	2	4BC;4BB;	Live birth 1	41+5	3520	Female
33876	7	15.63	Primary	Female	2	6.56	10.7	9.77	0.55	47.49	7.3	27.8	2	4BB;4AC;	Live birth 1	41+5	3500	Female
30357	2	24.03	Primary	Both	2	9.25	4.26	11.28	0.47	52.14	9.8	31.3	2	4BA;4BC;	Live birth 1	41+6	4100	Female
37131	4	27.34	Secondary	Female	2	2.04	6.7	8.7	0.65	19.81	8	29.9	2	4CB;3BB;	9W-miscarriage 2
24305	2	21.48	Secondary	Unexplained	2	3.46	5.57	24.19	0.91	55.7	9.1	23.7	2	4BA;4BC;	9W-miscarriage
27035	1	22.89	Secondary	Female	2	3.28	6.31	17.77	0.24	50.84	9.9	31.3	2	4BC;4BB;	9W-miscarriage
31522	9	28.84	Secondary	Both	2	20.37	7.06	10.88	0.26	35.99	8	33.9	2	4BB;4BC;	9W-miscarriage
31869	1	20.31	Primary	Female	1	5.04	9.92	9.71	0.71	39.55	11	28	2	4CB;4BB;	9W-miscarriage
32122	1	24.44	Secondary	Female	2	6.23	5.21	11.25	0.47	25.34	12	26	2	4AB;4AC;	9W-miscarriage
32322	4	24.84	Primary	Both	1	4.1	6.52	21.86	0.69	44.66	8	29.3	2	4CB;4BB;	9W-miscarriage
35138	7	18.29	Primary	Unexplained	2	13.6	9.53	19.82	0.23	48.94	10	33.9	2	4CB;4BB;	9W-miscarriage
38158	3	22.83	Primary	PCOS（Female）	1	6.25	4.26	11.23	0.78	25.14	8.5	33.8	2	4BB;4CB;	8W-miscarriage 2
24664	1	23.44	Secondary	Both	2	6.25	8.14	5.26	0.24	45.15	11.2	30.9	2	4BA;3BC;	8W-miscarriage 2
36182	3	17.58	Primary	Female	1	3.14	6.47	17.73	0.89	29.28	8	28.7	2	4BB;4CB;	8W-miscarriage 2
27738	4	21.1	Secondary	Female	1	5.74	6.01	12.82	0.82	36.17	8.2	35.9	2	4BB;4CB;	8W-miscarriage
30377	1	15.63	Primary	Female	2	6.28	4.26	8.92	0.24	26.48	9	33.3	2	3AB;4BC;	8W-miscarriage
31658	1	22.86	Secondary	Female	2	9.24	5.19	10.05	0.95	48.16	8.8	29.2	2	4BC;4BB;	8W-miscarriage
34306	1	20.96	Primary	EMS（Female）	1	6.27	11.25	9.48	0.47	24.16	9	33.6	2	4BB;4BC;	8W-miscarriage
35520	6	31.22	Primary	PCOS（Female）	1	1.45	6.19	8.35	0.39	28.81	8.5	29.5	2	4BB;4CA;	8W-miscarriage
35742	1	25.53	Secondary	Female	2	6.25	11.4	12.23	0.25	25.26	10	34.2	2	4BB;4BC;	8W-miscarriage
38859	6	21.72	Primary	PCOS（Female）	2	4.17	5.75	8.51	0.38	38.64	9	30.7	2	5CB;4BB;	8W-miscarriage
38061	2	20.31	Primary	Unexplained	2	3.88	7.24	17.22	0.44	45.58	8.5	28.4	2	4BC;4BB;	7W-miscarriage 2
33049	3	17.9	Primary	Both	1	7.22	9.49	14.94	0.27	27.11	9	29.1	2	4BC;4BB;	7W-miscarriage 2
28316	9	21.48	Primary	Both	2	4.01	6.57	11.78	0.61	60.69	9	29	2	4BA;4BC;	7W-miscarriage
32147	2	19.2	Secondary	Male	1	2.85	8.04	10.33	0.62	44.57	11	29.7	2	4CB;4BB;	7W-miscarriage
34452	4	19.56	Secondary	Female	1	3.78	8.94	27.6	0.67	42.26	8	28.6	2	4BB;4BC;	7W-miscarriage
36418	1	17.15	Secondary	Female	1	1.26	7.55	8.89	0.46	31.9	7.5	29.6	2	4BB;4CB;	7W-miscarriage
36821	4	24.84	Primary	Both	1	9.97	6.56	6.8	0.21	30.45	8.4	28.4	2	4BB;4CB;	7W-miscarriage
38468	1	22.58	Primary	Female	1	15.83	7.28	9.87	0.35	62.44	11	28.8	2	4BB;4CB;	7W-miscarriage
38475	5	23.88	Primary	Male	1	3.58	7.18	27.87	0.21	33.64	9	33.1	2	4BB;4CB;	7W-miscarriage
26487	5	19.68	Primary	Both	1	6.7	7.09	12.16	0.59	41.8	8.2	28.9	2	4BC;4BB;	6W-miscarriage 2
33636	2	26.04	Primary	Male	2	1.67	5.34	6.62	0.42	61.95	8	25.2	2	4AB;4CB;	6W-miscarriage
38758	2	19.05	Primary	Both	2	8.26	6.25	9.47	0.48	63.14	11.4	33.6	2	4BB;3CB;	6W-miscarriage
30966	7	23.44	Secondary	PCOS（Female）	2	4.99	3.22	6.89	0.49	43.51	8.5	32.4	2	4BB;4BC;	25W-miscarriage 2
32512	2	24.11	Primary	Female	2	6.23	5.14	11.25	0.47	58.14	9	27.2	2	4BA;4BC;	25W-miscarriage 2
39068	8	25.81	Secondary	Both	1	4.65	5.35	6.65	0.25	32.09	10	31.4	2	4BB;4CB;	24W-miscarriage 2
25561	7	18.79	Secondary	Female	2	1.93	5.12	14.2	0.34	40.82	8.5	28.6	2	4CB;4BB;	24W-miscarriage
35652	2	23.42	Primary	PCOS（Female）	2	8.34	2.95	27.82	0.24	48.14	7.5	27.6	2	4BB;4BC;	22W-miscarriage 2
35048	1	21.76	Secondary	Both	1	1.96	6.55	23.72	0.59	39.83	8.5	34.2	2	4BB;4BC;	19W-miscarriage
37269	3	29.02	Primary	Both	1	6.25	4.15	11.26	0.78	45.21	9.8	29.2	2	4CB;6BB;	18W-miscarriage 2
33277	2	23.23	Secondary	Both	2	6.58	5.25	12.15	0.58	48.56	8.5	32	2	4BB;4CB;	11W-miscarriage
33935	7	23.53	Secondary	Female	2	2.79	5.31	16.8	0.21	64.61	12	34.4	2	5BB;4BC;	11W-miscarriage
38964	3	22.6	Primary	Female	1	5.67	7.19	27.21	0.35	44.25	9.5	33.1	2	4BC;3BB;	10W-miscarriage 2
35801	2	18.83	Secondary	Female	1	2.53	5.63	6.01	0.25	34.19	9	33.7	2	4BC;4BB;	10W-miscarriage 2
34827	1	20.7	Secondary	Female	2	5.56	7.23	8.06	0.31	79.29	12.5	27.7	2	4BC;3AB;	10W-miscarriage
33899	3	19.05	Secondary	Female	1	3.62	6.94	12.16	0.46	42.05	9	31.5	2	4BB;4CB;	Ectopic pregnancy
35189	1	17.3	Secondary	Both	1	9.89	7.35	13.48	0.35	34.06	9.9	24.5	2	4BB;4BC;	Ectopic pregnancy
16184	7	23.74	Secondary	Female	2	12.9	4.32	3.25	0.25	64.2	8.8	32.6	2	4BC;4BB;	NO
21663	2	19.11	Primary	PCOS（Female）	2	3.44	5.09	17.14	0.45	36.76	9.5	29.6	2	4BB;4BC;	NO
22006	7	20.03	Secondary	Unexplained	2	3.86	7.66	7.78	0.52	30.93	9.9	33.8	2	4BB;4BC;	NO
22341	1	19.1	Primary	Female	2	6.28	10.43	9.91	0.37	44.6	7	29.6	2	4BC;4BB;	NO
24974	4	18.83	Secondary	Female	2	4.91	7.7	12.45	0.4	38.67	8	34.3	2	4BB;3BC;	NO
25815	2	20.94	Primary	Female	2	6.25	11.25	14.25	0.45	52.26	8.8	31.8	2	5BB;4CB;	NO
25997	1	21.36	Secondary	Female	2	3.98	6.14	12.09	0.6	41.89	13	31	2	4BC;4BA;	NO
26682	5	19.2	Secondary	Female	2	3.97	8.42	10.44	0.68	67.91	10.3	28.5	2	4AB;4BC;	NO
27841	1	20.7	Secondary	Female	1	4.41	6.04	9.88	0.68	51.58	7.3	32.9	2	4CB;4BB;	NO
27847	3	20.55	Secondary	PCOS（Female）	2	8.22	4.87	14.46	0.55	54.08	10	31.7	2	4BB;4AC;	NO
28269	5	26.67	Secondary	Female	2	4.47	1.24	13.11	0.59	31.42	11	32.8	2	4BA;4BC;	NO
28371	2	17.26	Primary	Male	2	5.91	7.97	17.01	0.89	52.6	9	29.5	2	4BB;4BC;	NO
28778	4	23.05	Primary	Unexplained	2	3.52	6.12	16.07	0.6	50.72	9	30.4	2	4BB;4BC;	NO
28888	1	23.01	Secondary	Both	2	1.36	6.64	13.37	0.33	48.24	7.5	30.3	2	4BB;4BC;	NO
29942	3	24.77	Secondary	Female	2	2.83	4.42	10.63	0.51	32.3	8	30.8	2	3AB;4CB;	NO
30106	3	23.44	Primary	PCOS（Female）	1	10.26	4.26	11.25	0.48	52.14	9.5	22.9	2	4BB;4AC;	NO
30381	1	22.27	Secondary	Unexplained	1	4.04	9.48	14.9	0.74	70.41	7.6	32.5	2	4CB;3BB;	NO
30469	8	23.59	Secondary	Female	2	2.51	8.21	9.08	0.37	38.54	8.9	33.8	2	4BB;4BC;	NO
30707	1	23.73	Secondary	Female	2	2.8	7.13	13.3	0.46	14.9	8.7	29	2	5BC;4BB;	NO
31019	2	21.76	Primary	Female	2	6.25	8.14	11.26	0.47	48.26	12.7	28.7	2	4BB;4CB;	NO
31088	4	17.75	Primary	PCOS（Female）	1	14.01	6.46	3.17	0.63	59.03	9.4	26.5	2	4BA;4BC;	NO
31372	3	15.24	Secondary	Unexplained	2	3.48	6.56	22.41	0.52	50.47	8.7	28.9	2	4BB;3BC;	NO
31506	1	20.03	Secondary	PCOS（Female）	2	6.23	7.25	11.25	0.48	52.16	9.8	30	2	4BB;3BC;	NO
31531	2	21.48	Secondary	PCOS（Female）	1	9.8	3.52	8.24	0.35	20.95	9	34	2	4BB;4AC;	NO
31565	1	19.15	Secondary	Both	1	3.63	5.41	18.56	0.68	67.7	7.5	34.2	2	4BB;4BC;	NO
31676	7	23.56	Secondary	PCOS（Female）	2	2.83	5.77	10.37	0.5	39.58	9	32.8	2	4BB;4BC;	NO
31974	3	21.19	Secondary	PCOS（Female）	2	6.82	6.49	4.1	0.55	56.15	7.4	28.2	2	4BC;3BB;	NO
32120	10	24.34	Primary	Both	2	2.67	7.56	13.91	0.41	18.21	8	32.9	2	3BB;4CB;	NO
32384	5	20.32	Primary	Unexplained	1	2.47	4.35	8.94	0.63	44.42	8.5	30	2	4BB;4BC;	NO
32409	3	21.23	Primary	Both	2	6.81	5.12	20.73	0.83	70.08	8	29.8	2	4BB;4BC;	NO
32582	3	16.89	Secondary	Unexplained	2	4.47	4.31	15.38	0.52	53.08	9.1	23.2	2	4CB;3AB;	NO
32656	3	24.24	Secondary	Unexplained	2	2.45	5.08	13.96	0.38	64.67	8	35.1	2	4BB;4CA;	NO
32849	3	23.88	Secondary	Female	2	3.76	6.51	11.42	1.02	64.46	7.5	35.3	2	4BB;3BC;	NO
32977	2	20.7	Primary	Female	2	3.84	9.7	7.83	0.74	26.4	10.2	28.3	2	4CB;4BB;	NO
33056	5	29.67	Primary	PCOS（Female）	1	13.55	5.72	11.91	0.21	75.17	10	30.1	2	4CB;3BB;	NO
33121	1	18.59	Secondary	Both	2	3.68	8.75	19.16	0.43	58.1	10.3	34.7	2	3BB;4BC;	NO
33328	7	24.51	Secondary	Male	1	4.78	8.13	12.63	0.29	34.51	7	31.2	2	5BB;3BC;	NO
33374	8	21.78	Secondary	Female	1	2.03	6.12	12.72	0.52	33.52	7.8	33.9	2	5BB;4CB;	NO
33406	3	21.21	Secondary	Female	2	3.55	8.22	8.75	0.25	53.85	10	31.1	2	4AB;4BC;	NO
33438	3	19.14	Primary	PCOS（Female）	2	5.43	7.24	13.79	0.87	43.85	7	26.1	2	4BB;4CB;	NO
33485	3	23.23	Secondary	Both	2	4.96	7.19	7.21	0.37	32.13	8.8	28.3	2	4BB;4CB;	NO
33699	3	19.98	Secondary	Female	2	2.86	6.21	8.56	0.4	54.55	8.1	33	2	4BB;4BC;	NO
33807	2	22.96	Secondary	PCOS（Female）	2	2.79	8.21	4.85	0.55	47.2	10.6	35	2	4BB;4CB;	NO
34021	2	18.73	Secondary	Both	2	7.19	7.98	19.58	0.51	41.78	12.7	25.9	2	4BA;4CB;	NO
34134	4	27.34	Secondary	Female	1	4.11	5.6	10.59	0.23	35.95	11	31.7	2	4CB;4BB;	NO
34202	3	18.97	Primary	Female	2	4.37	8.21	23.34	0.49	59.43	8.5	28.2	2	4BB;4CB;	NO
34596	1	20.57	Secondary	Female	2	3.18	7.04	7.92	0.77	45.2	8	35.3	2	4BC;3AB;	NO
34909	1	20.31	Secondary	Female	2	2.08	5.56	14.01	0.47	53.31	8.5	30.6	2	4BC;3BB;	NO
34968	3	26.26	Primary	Both	2	6.23	5.24	11.25	0.47	25.26	10.1	28.2	2	4BB;4CB;	NO
35005	2	20.03	Secondary	Unexplained	2	6.23	12.15	7.48	0.45	23.25	9	34.3	2	4BC;3BB;	NO
35008	2	20.03	Secondary	Male	2	4.12	9.33	7.87	0.5	32.63	8	29.3	2	4BB;4CA;	NO
35056	1	16.97	Secondary	Female	1	7.46	3.53	18.74	0.28	27.01	8.5	27.3	2	4CB;4BB;	NO
35067	2	20	Primary	Female	2	3.33	6.16	12.12	0.21	68.77	10	30.4	2	4BC;3BB;	NO
35243	5	26.77	Primary	Both	1	3.95	8.4	7.83	0.68	33.02	12	30.3	2	4BC;4BB;	NO
35247	2	17.97	Secondary	Female	2	4.45	8.19	10.57	0.46	57	8.5	35.2	2	4BB;4CB;	NO
35658	6	18.36	Secondary	Both	2	6.25	10.25	11.35	0.56	37.58	8	27	2	4BC;4BB;	NO
35881	3	28.13	Primary	Female	2	6.23	5.14	10.26	0.47	24.16	7.3	30.1	2	4BB;4CB;	NO
35887	9	19.65	Primary	Female	2	2.59	10.02	12.03	0.37	20.4	10	35.7	2	4BB;4CB;	NO
36334	2	22.27	Secondary	Both	1	8.96	5.92	9.88	0.77	63.45	8	30.5	2	3CB;5BB;	NO
36440	7	19.96	Secondary	Female	2	5.05	11.66	9.81	0.6	52.65	9	29.8	2	4BB;4CB;	NO
36537	3	16.85	Primary	Female	2	8.22	11.07	19.73	0.52	60.79	11.8	30.3	2	5CB;3BB;	NO
37067	4	20.44	Secondary	Female	2	2.77	8.42	11.78	0.39	41.94	7	31.8	2	4BC;3BB;	NO
37172	2	21.38	Primary	Female	1	3.1	7	13.64	0.38	30.58	8.5	27.6	2	5BB;3BC;	NO
37304	2	18.92	Secondary	Female	1	5.45	9.63	13.76	0.45	41.41	8	23.9	2	4BB;5BC;	NO
37724	3	19.56	Primary	Female	1	6.18	5.14	11.25	0.45	58.59	9	23.5	2	5BB;4CB;	NO
37826	2	23.11	Secondary	Female	2	3.8	6.53	7.39	0.79	43.31	9	32.1	2	4BB;4CB;	NO
37916	2	27.01	Primary	Both	2	5.43	3.57	12.7	0.66	51.67	7	25.5	2	4BB;4BC;	NO
37942	2	21.48	Primary	Unexplained	2	6.23	8.47	10.26	0.48	26.25	12	29.1	2	4BB;4CB;	NO
37985	4	19.53	Secondary	Female	1	4.63	7.13	29.31	0.6	33.86	10	24.7	2	4CB;4BB;	NO
37987	3	21.36	Secondary	Female	2	4.44	7.53	7.79	0.35	43.56	7.5	32.9	2	4BB;5BC;	NO
38230	1	23.23	Secondary	Female	2	10.25	5.26	8.48	0.47	36.25	8.5	26.9	2	4BB;3CB;	NO
38287	1	20.4	Secondary	Female	1	4.17	14.38	7.32	0.37	55.51	9.5	31.4	2	4BB;4BC;	NO
38325	3	19.11	Primary	Female	2	6.25	7.14	9.26	0.56	57.58	9.1	25.2	2	3BC;4BB;	NO
38593	3	21.19	Primary	Unexplained	2	3.72	6.02	11.41	0.34	47.8	12	29.7	2	4BB;4BC;	NO
38747	3	18.9	Secondary	Female	2	8.28	8.1	9.47	0.26	58.83	11	34.8	2	4BB;4BC;	NO
38866	3	18.73	Primary	Both	2	3.48	9.32	25.27	0.68	47.28	8.6	27.4	2	4BB;4CB;	NO
39041	1	20.7	Secondary	Female	1	8.26	5.26	10.25	0.45	26.35	9.5	32.5	2	4BB;4BC;	NO
39109	1	23.73	Secondary	Female	2	3.95	8.31	8.32	0.52	46.34	9.5	33.9	2	4BB;3CB;	NO
39377	2	21.23	Secondary	Male	1	4.63	4.65	5.52	0.68	57.61	7.5	34.9	2	4BB;3CB;	NO
39644	5	28.23	Secondary	Female	2	2.15	8.19	7.34	0.21	30.8	8.5	34	2	4BB;3CB;	NO
39961	4	23.6	Primary	PCOS（Female）	1	2.02	2.03	8.29	0.45	22.02	9.5	30.3	2	4BB;4BC;	NO
8433	2	24.65	Secondary	PCOS（Female）	2	2.81	2.91	11.28	0.39	48.6	9	35.9	2	4BA;4BC;	Biochemical pregnancy
10369	3	22.31	Secondary	Female	2	3.24	7	12.93	1.04	42	11.8	27.2	2	4BB;3BC;	Biochemical pregnancy
18581	7	18.65	Primary	Unexplained	2	8.96	8.52	16.7	0.37	49.97	9	33.9	2	4BB;4BC;	Biochemical pregnancy
21825	3	21.78	Secondary	Unexplained	2	4.22	7.69	10.79	0.29	25.53	9	31.7	2	4BC;3BB;	Biochemical pregnancy
22839	1	23.51	Secondary	Female	2	3.86	8.22	4.36	0.31	26.8	10.5	26.9	2	3BB;3BC;	Biochemical pregnancy
23744	2	21.6	Secondary	Female	2	7.01	6.13	11.6	0.51	28.2	9	34.2	2	4CB;4BB;	Biochemical pregnancy
26895	5	21.78	Primary	PCOS（Female）	2	2.68	7.42	12.51	0.52	35.53	8.2	31	2	4BB;4CB;	Biochemical pregnancy
28991	6	21.72	Primary	PCOS（Female）	2	7.82	8.64	6.59	1.01	62.37	8.2	32.7	2	4BB;4BC;	Biochemical pregnancy
29197	1	23.23	Secondary	Female	2	3.59	6.65	19.68	0.16	26.17	10	25.1	2	4CB;4BB;	Biochemical pregnancy
29282	2	20.9	Primary	Female	2	4.5	7.33	6.37	0.34	32.81	9	28.7	2	4BB;4CB;	Biochemical pregnancy
29596	2	20.2	Primary	Female	2	2.64	9.73	24.87	0.73	43.64	11	31.4	2	4BC;6BA;	Biochemical pregnancy
29834	7	20.55	Primary	Both	2	2.1	7	23.56	0.68	39.32	9	27.2	2	5BB;4BC;	Biochemical pregnancy
29836	6	23.11	Secondary	PCOS（Female）	1	5.69	6.79	7.79	0.6	31.44	7.9	34.3	2	4BB;4BC;	Biochemical pregnancy
30147	4	19.14	Primary	Male	2	2.95	5.28	7.69	0.75	32.62	12.7	29.5	2	4BB;4CB;	Biochemical pregnancy
30562	4	19.1	Secondary	Female	2	4.91	5.95	12.57	0.79	43.79	10	30.5	2	4CB;4AB;	Biochemical pregnancy
31280	1	24.61	Secondary	Both	2	2.01	6.15	6.91	0.28	36.95	8.5	27.3	2	3BB;4BC;	Biochemical pregnancy
31331	2	29.3	Secondary	Both	2	5.63	6.68	7.51	0.26	63.12	8.1	27.6	2	5BB;4BC;	Biochemical pregnancy
31410	5	19.53	Secondary	Both	2	5.21	6.76	7.15	0.42	48.23	9.5	32.7	2	4BB;4BC;	Biochemical pregnancy
31632	1	24.84	Secondary	Female	2	6.23	5.47	11.25	0.48	45.25	8.2	30.6	2	4BB;4CB;	Biochemical pregnancy
31856	6	24.84	Secondary	Female	2	4.01	5.25	10.83	0.49	31.66	9.9	33.1	2	4BB;4CB;	Biochemical pregnancy
31884	2	20.31	Primary	Both	1	2.85	2.18	12.68	0.35	33.21	8.2	23.8	2	5BC;4BB;	Biochemical pregnancy
31994	3	22.77	Secondary	Female	2	3.27	5.52	5.86	0.37	28.85	10	27.8	2	4BB;4BC;	Biochemical pregnancy
32045	2	19.14	Secondary	PCOS（Female）	1	21.8	7.2	9.3	0.21	49.47	7	26.8	2	4BC;4BB;	Biochemical pregnancy
32136	10	26.37	Secondary	PCOS（Female）	2	13.28	3.39	15.33	0.61	52.15	11	32.3	2	4BB;4CB;	Biochemical pregnancy
32218	2	21.08	Secondary	Female	2	4.01	7.32	9.71	0.22	38.6	7	22.6	2	4BB;4CB;	Biochemical pregnancy
32276	1	17.91	Secondary	Female	1	11.19	11.57	9.72	0.26	48.88	7.3	23.3	2	4BB;4CB;	Biochemical pregnancy
33183	1	25	Secondary	Both	1	6.25	4.87	11.25	0.47	58.14	8.4	26.2	2	4CB;4BB;	Biochemical pregnancy
33275	6	27.48	Primary	Both	1	2.71	5.94	6.38	0.38	26.44	8	29.2	2	4BB;4BC;	Biochemical pregnancy
33303	3	19.29	Primary	Both	2	3.54	6.53	9.18	0.31	69.67	8	25.3	2	4BB;4BC;	Biochemical pregnancy
33509	8	17.96	Primary	EMS（Female）	1	4.26	7.32	12.34	1.04	23.68	14	26.3	2	4BB;3BC;	Biochemical pregnancy
33613	6	22.21	Secondary	PCOS（Female）	1	3.26	2.58	10.25	0.15	45.26	7.5	34.9	2	4AC;3BB;	Biochemical pregnancy
33794	3	26.56	Primary	Female	1	6.23	8.45	5.15	0.48	52.14	10	22.6	2	4BB;4CB;	Biochemical pregnancy
33970	3	21.5	Primary	Both	1	6.06	6.85	9.81	0.41	39.69	12	27.1	2	4BB;3BC;	Biochemical pregnancy
34142	7	23.92	Primary	Both	1	3.42	4.66	9.94	0.71	48.39	13	35.4	2	4BB;4CB;	Biochemical pregnancy
34167	2	18.83	Secondary	Female	2	5.28	6.14	10.25	0.14	58.14	11	32.7	2	4BC;4BB;	Biochemical pregnancy
34325	5	27.34	Secondary	Male	2	8.53	5.24	8.6	0.19	26.46	8	29.8	2	4CB;3BB;	Biochemical pregnancy
34392	4	26.71	Primary	Both	2	4.97	9.73	20.03	0.68	36.58	8.8	29.1	2	4BB;3BC;	Biochemical pregnancy
34649	3	22.02	Secondary	Unexplained	2	4.18	7.4	17.47	0.38	38.97	7.8	32.6	2	5BB;4CB;	Biochemical pregnancy
35003	1	22.86	Primary	Female	2	3.43	4.86	10.59	0.41	50.24	8.2	33	2	4BB;4BC;	Biochemical pregnancy
35083	5	24.56	Primary	Unexplained	1	1.26	7.52	7.24	0.25	35.7	8.5	28.3	2	4BC;4BB;	Biochemical pregnancy
35551	2	18.82	Secondary	Female	1	6.24	5.84	20.05	0.57	43.88	9	26.9	2	4BC;4BB;	Biochemical pregnancy
35660	10	16.82	Primary	Unexplained	1	2.47	5.36	23.85	0.45	67.62	7	30.2	2	4BB;3BC;	Biochemical pregnancy
35941	5	20	Primary	Female	2	5.07	7.11	7.92	0.48	31.44	7	25.3	2	4BB;4CB;	Biochemical pregnancy
36098	1	24.46	Secondary	Both	1	3.79	5.68	11.52	0.31	35.56	10	32.5	2	4CB;4BB;	Biochemical pregnancy
36248	2	18.43	Secondary	Both	1	5.33	6	20.99	0.49	36.08	11	28.5	2	4BB;3BC;	Biochemical pregnancy
36412	6	26.67	Primary	Both	1	6.05	5.62	8.08	0.69	38.45	10.1	28.7	2	4BB;5BC;	Biochemical pregnancy
37254	6	18.65	Primary	PCOS（Female）	2	4.8	4.99	8.34	0.57	37.18	8	29.6	2	4BB;4CB;	Biochemical pregnancy
37286	2	25.33	Primary	Both	2	4.46	5.62	9.57	0.53	33.26	8.5	35.1	2	4BC;3BB;	Biochemical pregnancy
37496	3	17.26	Secondary	PCOS（Female）	2	12.12	8.76	6.46	0.66	67.8	11	30.6	2	4BB;4CB;	Biochemical pregnancy
37547	5	16.77	Primary	Female	2	8.79	5.21	21.11	0.67	66.72	11.6	30	2	4BC;4BA;	Biochemical pregnancy
37790	2	26.57	Primary	Both	1	10.18	5.48	10.39	0.48	37.77	9.5	31.4	2	4BB;4CB;	Biochemical pregnancy
37820	2	27.06	Secondary	Female	2	2.96	6.38	9.85	1.14	67.67	7	31.2	2	4BB;3CB;	Biochemical pregnancy
38131	5	30.86	Secondary	PCOS（Female）	1	3.01	4.87	5.33	0.56	40.32	8	25.7	2	4BB;5CB;	Biochemical pregnancy
38354	3	26.37	Secondary	Both	2	7.31	4.64	7.37	0.45	50.72	9.5	29.9	2	4CA;4BB;	Biochemical pregnancy
38895	4	18.13	Secondary	Female	1	4.68	10.5	8.83	0.47	52.74	7.5	29.5	2	4BB;4CB;	Biochemical pregnancy

## Sheet: poor-quality double(C)
ID	Infertility duration	BMI	Infertility type	Cause of infertility	Transplant cycle	LH	FSH	PRL	P	E2	En	Age	the number of transferred blastocysts	blastocyst scoring	pregnancy outcomes	Neonatal birth age	Neonatal birth weight	Neonatal sex ratio	Special case
40023	3	20.94	Primary	PCOS（Female）	1	7.87	6.76	16.34	0.24	54.9	9	32.5	2	4CA;4CB;	Biochemical pregnancy
39959	3	24.44	Secondary	PCOS（Female）	1	9.87	6.44	13.55	0.34	50	9	29.3	2	4CB;4CB;	Biochemical pregnancy
39844	3	24.68	Secondary	Female	2	3.22	3.97	10.05	0.75	51.9	8.5	24.7	2	4CB;4CB;	No
39826	3	22.06	Primary	Female	2	4.81	10.45	21.34	0.43	26.4	7.5	33.3	2	4BC;4CB;	No
39774	1	19.05	Secondary	Female	2	4.31	14.87	5.57	0.3	43	8.5	28.6	2	4CB;5CB;	6W-miscarriage
39716	8	22.03	Primary	Female	1	6.28	11.15	12.15	0.48	52.16	7.2	35.6	2	3CB;4BC;	No
39684	3	21.48	Primary	Female	2	6.28	8.47	5.29	0.48	63.25	8.5	35.8	2	4CB;4CB;	Live birth 1	38	3200	Male
39570	3	21.76	Primary	Both	1	3.47	5.09	4.72	0.47	32.9	7.5	31	2	4BC;4CB;	8W-miscarriage 2
39339	3	22.89	Secondary	Unexplained	2	1.31	5.52	4.7	0.21	53.71	8.5	33.9	2	4CB;4CB;	Live birth 1	40+5	4500	Male
39285	3	25.86	Primary	PCOS（Female）	2	6.26	8.74	11.29	0.48	51.47	8	29.7	2	4CB;4BC;	No
39031	2	23.34	Primary	Female	2	4.5	4.75	10.87	0.3	44.77	11	32.3	2	4BC;5BC;	Live birth 1	40	3400	Female
38955	3	18.49	Primary	Unexplained	1	6.28	4.15	9.25	0.47	26.14	8	29.5	2	4BC;4CB;	Live birth 1	41+1	3700	Female
38926	1	25.39	Primary	Unexplained	1	3.74	6.75	5.59	0.52	44.3	7.2	25.9	2	4CB;4BC;	No
38835	4	24.13	Primary	PCOS（Female）	1	6.28	8.47	11.25	0.47	54.17	9.5	32.6	2	5CB;4CB;	6W-miscarriage
38725	4	21.48	Primary	Unexplained	2	6.28	8.47	8.56	0.24	56.14	8.5	26.8	2	4BC;3CB;	No
38698	1	21.48	Secondary	Female	1	4.58	8.14	17.58	0.57	45.8	8.4	24.2	2	4CB;3CB;	No
38644	3	25.46	Primary	Both	2	8.99	5.3	5.27	0.35	49.32	9.5	33.5	2	4CB;4CB;	No
38564	5	17.63	Primary	Both	2	3.15	6.22	18.55	0.7	55.38	9	35.6	2	4BC;3BC;	Biochemical pregnancy
38543	1	19.53	Primary	Unexplained	2	4.87	8.63	11.39	0.21	33.74	7	32.9	2	4BC;5CB;	Live birth 2	36+1	2300/2150	Female/Female	Preterm birth/ICP
38331	1	18.36	Secondary	Female	2	10.26	8.59	11.25	0.45	56.24	8.5	31	2	4BC;3BC;	Biochemical pregnancy
38316	1	24.44	Secondary	Female	2	2.14	5.76	8.65	0.21	55.82	11.9	33.6	2	4BC;4CB;	Biochemical pregnancy
38301	2	20.96	Secondary	Unexplained	2	2.5	6.47	11.32	0.58	49.49	7.3	25.7	2	4CB;4CB;	Live birth 1	38+1	3050	Female
38294	1	20.24	Secondary	Unexplained	1	2.71	7.86	5.93	0.5	58.84	8.5	35.5	2	4AC;3BC;	Live birth 1	40	3600	Male
38288	2	19.29	Primary	Both	1	6.65	8.74	10.15	0.72	68.69	10.7	28.7	2	4CB;4CB;	Biochemical pregnancy
38191	3	24.61	Primary	Both	2	2.42	5	9.04	0.6	36.9	11	30	2	4CB;4BC;	Live birth 1	37+1	2350	Female
38142	6	24.35	Primary	Female	1	3.19	8.54	12.6	1	38.17	9.4	24.9	2	4BC;4CB;	No
38097	1	27.55	Primary	Both	2	10.26	5.85	11.23	0.47	56.14	9	27.1	2	4BC;4BC;	Live birth 1	37+6	3610	Female	GDM
38065	2	29.52	Secondary	PCOS（Female）	1	6.73	5.6	6.47	0.4	46.32	9	32.3	2	4BC;4BC;	Live birth 1	37	2350	Male
38035	3	18.59	Secondary	PCOS（Female）	1	3.31	4.34	23.44	0.53	66.91	10	29.7	2	4CB;4CB;	Live birth 2	36+6	2600/2550	Male/Female	Preterm birth
38024	12	22.27	Secondary	Female	2	6.3	4.98	6.13	0.38	41.9	8.5	35.2	2	4BC;4CB;	20W-miscarriage
37944	4	18.65	Primary	PCOS（Female）	1	10.26	5.87	10.26	0.48	45.14	8.5	28.2	2	4CB;4BC;	Live birth 1	39	3750	Female
37857	4	21.88	Secondary	Female	1	5.56	9.01	11.71	0.48	67.07	9	35.8	2	4CB;3CB;	8W-miscarriage
37853	2	17.58	Secondary	Unexplained	2	3.36	8.34	11.67	0.45	38.4	7.5	28.3	2	4CB;4CB;	Live birth 1	38+4	3200	Female
37841	4	19.03	Primary	PCOS（Female）	1	7.42	7.59	17.97	0.45	59.33	10	31.5	2	5CB;3BC;	Live birth 1	39	3600	Male
37835	3	26.67	Primary	PCOS（Female）	2	6.25	5.47	10.25	0.55	25.17	9	34.7	2	4CB;4CB;	Live birth 2	37+3	2490/3180	Female/Female
37801	1	18.83	Primary	Unexplained	1	3.31	8.58	22.39	0.54	37.07	8.5	31.7	2	4CB;3CB;	Live birth 1	40+5	3350	Female
37758	3	20.31	Primary	Male	2	4.26	4.77	11.1	0.29	57.23	9	33.5	2	4BC;4CB;	Live birth 2	37+1	2515/2510	Male/Male
37754	4	25.22	Primary	PCOS（Female）	2	1.11	5.02	12.33	0.78	43.15	9	35.4	2	4CB;4CB;	Live birth 2	35+6	2251/2333	Male/Female	Preterm birth
37665	2	24.65	Secondary	Female	2	2.09	6.18	8.58	0.55	41.25	9.5	29.7	2	4BC;4BC;	No
37663	5	22.03	Secondary	Both	2	4.99	7.18	4.65	0.43	30.35	9	30.8	2	4BC;4CB;	No
37623	1	22.04	Secondary	Both	2	3.96	7.08	6.78	0.46	50.72	8.5	32.9	2	4BC;3BC;	Live birth 1	39+2	2950	Male
37542	1	26.35	Primary	Unexplained	1	2.09	8.65	27.86	0.65	54.4	11	32	2	4CB;4CB;	Biochemical pregnancy
37524	4	26.22	Secondary	PCOS（Female）	1	3.16	4.79	10.65	0.57	56.54	10.1	28.4	2	4BC;4BC;	Live birth 2	36+3	2100/2530	Male/Female	Preterm birth/gestational hypertension
37508	2	24.03	Secondary	Both	2	5.16	5.9	6.82	0.45	46.97	8.7	34	2	4BC;3BC;	Live birth 1	37+6	3000	Male
37490	4	25.08	Primary	Male	1	1.06	3.72	8.53	0.66	36.09	9	30.6	2	4BC;4CB;	No
37487	2	21.88	Secondary	Both	2	2.91	5.4	10.67	0.87	25.78	7.5	33.5	2	4BC;4BC;	No
37439	5	19.65	Primary	Female	1	4.18	6.9	13.53	0.59	27.54	10	33.1	2	4BC;4CB;	Live birth 1	39+3	2900	Male
37431	3	23.92	Secondary	Female	2	6.25	8.47	10.25	0.48	45.15	7.5	35.3	2	3BC;4CB;	20W-miscarriage
37414	4	20.31	Primary	Unexplained	1	4.47	9.98	10.55	0.56	33.29	12	27	2	4BC;4BC;	12W-miscarriage
37355	3	21.48	Secondary	PCOS（Female）	1	2.75	6.28	14.46	0.53	35.26	8.5	26.2	2	4CB;3CB;	Live birth 1	39+1	3750	Female	2，1miscarriage
37223	3	23.63	Primary	Both	2	12.22	8.64	8.09	0.36	52.41	11	26.3	2	4BC;4CB;	Biochemical pregnancy
37219	1	28.13	Secondary	Both	1	6.52	5.02	12.52	0.79	31.71	8.8	23.9	2	4AC;4BC;	5W-miscarriage
37174	3	20.81	Primary	Both	1	4.82	8.65	20.43	0.81	58.3	9.5	31.9	2	4BC;4CB;	7W-miscarriage
37172	2	21.38	Primary	Female	2	3.1	7	13.64	0.68	30.58	15	27.7	2	4CB;4BC;	No
37025	2	23.88	Secondary	Both	2	2.86	4.54	12.24	0.85	39.29	10.8	30.9	2	5CB;4CB;	Live birth 2	38	3520/2550	Male/Female
36986	3	17.01	Primary	Female	2	10.99	10.75	17.57	0.44	32.26	9	35.2	2	4BC;3CB;	Biochemical pregnancy
36972	5	22.89	Primary	Female	2	6.18	7.69	11.98	0.22	35.84	10	25.3	2	4BC;4CB;	Live birth 2	38	2700/2800	Male/Female
36934	4	18.75	Secondary	Female	1	6.25	8.47	10.26	0.25	61.25	9	34	2	3CB;4CB;	No
36881	1	19.53	Secondary	Female	2	5.17	8.63	8.4	0.5	36.73	10	35.8	2	4CB;3CB;	Live birth 1	37+2	2510	Male
36778	2	23.23	Secondary	Both	2	9.14	6.65	9.29	0.88	47.2	9	28.2	2	5CB;4CB;	Biochemical pregnancy
36723	6	19.92	Primary	PCOS（Female）	1	12.26	5.89	10.25	0.48	45.26	7.3	30.4	2	3CB;4CB;	Live birth 1	37+4	2500	Female
36717	2	24.44	Secondary	Male	2	3.3	8.05	11.45	0.45	56.58	8	32.8	2	4CB;4CB;	Live birth 2	36	2500/2600	Female/Female	Preterm birth
36695	1	18.36	Secondary	Female	2	4.35	10.27	9.06	0.71	47.77	9.5	35.1	2	5BC;4BC;	11W-miscarriage
36625	3	24.22	Primary	Female	1	10.26	6.25	10.26	0.48	52.26	10	25.5	2	4CB;4CB;	Biochemical pregnancy
36613	1	23.62	Secondary	Female	2	5.3	6.84	16.3	0.54	30.89	9	25.9	2	4BC;4CB;	Biochemical pregnancy
36449	6	26.04	Primary	Unexplained	2	2.89	6	4.94	0.4	35.2	9.5	31	2	5CB;4AC;	9W-miscarriage
36386	2	20.2	Secondary	PCOS（Female）	2	11.02	11.97	10.26	1.01	65.26	7	32.4	2	4BC;4BC;	No
36377	3	22.89	Primary	Male	2	3.81	8.46	13.38	0.43	65.04	8.5	28.4	2	4BC;4CB;	Live birth 1	39+6	3300	Female	2，1miscarriage
36346	3	18.37	Primary	Unexplained	2	3.91	7.51	16.28	0.84	50.74	9.6	26.4	2	5BC;4BC;	No
36281	4	20.7	Secondary	Unexplained	2	6.28	5.47	10.26	0.58	54.16	9.5	32	2	4BC;3BC;	Live birth 1	40+3	3800	Male
36268	7	17.31	Secondary	Both	2	3.43	5.61	19.71	0.53	54.58	8.1	26.4	2	5BC;4BC;	Biochemical pregnancy
36252	4	20.2	Primary	PCOS（Female）	2	12.3	7.27	8	0.35	37.78	8.9	28	2	4CB;3CB;	Live birth 2	37+3	3050/2450	Male/Male
36208	4	25.71	Primary	Female	2	4.82	9.78	20.39	0.23	32.29	7.5	24.7	2	4AC;3BC;	Live birth 2	37+6	3100/2500	Male/Female
36181	2	18.26	Primary	PCOS（Female）	2	4.56	6.62	13.93	0.34	68.09	11.2	28.8	2	4BC;4BC;	Live birth 1	39	3050	Female
36175	1	19.95	Primary	EMS（Female）	1	5.35	7.14	20.73	0.47	28.62	11	32.4	2	4CB;4BC;	Live birth 2	36+6	2300/2800	Female/Female	Preterm birth
36148	3	18.29	Primary	Unexplained	2	4.16	6.7	22.6	0.57	42.17	8.2	28	2	4CB;5CB;	No
36135	1	20.03	Secondary	Female	2	4.78	6.55	12.72	0.21	68.36	7.6	32	2	4BC;4CB;	Biochemical pregnancy
36120	2	18.37	Primary	Unexplained	2	6.28	8.47	10.26	0.47	56.14	8.5	26	2	4BC;4BC;	Live birth 1	38+6	3150	Female	GDM
36107	2	17.97	Secondary	EMS（Female）	2	4.29	5.29	11.96	0.49	44.03	7	35.4	2	4BC;4CB;	Biochemical pregnancy
36098	1	24.46	Secondary	Both	2	3.79	5.68	11.52	0.31	35.56	8	32.9	2	4BC;4CB;	Live birth 1	38+2	4750	Male	2，1miscarriage
35983	1	21.48	Secondary	Female	1	4.92	6.08	11.4	0.47	35.47	8.5	28.4	2	4BC;4BC;	Live birth 1	34+6	2300	Male	2-1（tire reduction)
35920	7	25.81	Primary	Female	1	2.32	4.05	8.6	0.62	64.79	9.5	28.6	2	4BC;4CB;	Biochemical pregnancy
35906	2	15.02	Primary	Male	2	7.6	8.61	9.15	0.9	67.54	9	24.5	2	4BC;4BC;	Live birth 2	35+2	2350/2300	Male/Female	Preterm birth
35854	1	28.04	Primary	Both	1	3.42	4.48	9.79	0.34	25.48	9	27.1	2	4BC;4BC;	Biochemical pregnancy
35814	3	21.48	Secondary	Both	1	6.58	7.48	12.15	0.48	56.14	11	33.3	2	4CB;4CB;	Biochemical pregnancy
35812	3	18.36	Primary	Female	2	4.73	6.33	28.38	1.03	25.62	10	33.4	2	5CB;3CB;	Biochemical pregnancy
35708	4	18.82	Secondary	PCOS（Female）	1	6.42	6.96	12.55	0.58	51.31	9.3	27.5	2	4BC;3BC;	No
35607	1	20.96	Secondary	Female	2	6.28	8.96	8.47	0.47	56.23	7	25.9	2	4BC;4CA;	Biochemical pregnancy
35603	1	17.78	Secondary	Female	2	6.29	8.47	10.26	0.48	24.89	9	34.7	2	4CB;4BC;	Biochemical pregnancy
35539	1	23.53	Secondary	Female	1	10.25	6.28	11.26	0.48	25.16	7.3	33.8	2	4BC;4CB;	8W-miscarriage
35537	1	25.64	Secondary	Both	2	6.25	8.47	10.25	0.45	26.25	7.5	27.2	2	4BC;4CB;	Biochemical pregnancy
35533	3	22.21	Primary	Both	1	11.56	5.25	14.17	0.33	56.09	9.4	28.1	2	4BC;4CB;	6W-miscarriage
35476	5	21.55	Primary	Female	1	4.24	10.3	21.87	0.62	40.75	8.5	30.2	2	4CB;4BC;	No
35474	3	21.09	Secondary	Female	2	3.9	6.07	9.31	0.45	20.21	8.8	25.2	2	4BC;5BC;	Biochemical pregnancy
35452	2	20.13	Primary	Unexplained	2	3.59	6.75	11.23	0.58	24.09	9	28.9	2	4BC;4BC;	Live birth 1	37+6	2900	Female	2，1miscarriage
35438	4	22.58	Primary	Unexplained	1	6.25	8.47	10.25	0.48	52.26	8.5	28.8	2	4BC;4BC;	No
35358	1	19.92	Secondary	Both	2	3.86	5.41	8.01	0.21	65.76	10.5	25	2	4BC;4CB;	Live birth 1	39+4	3800	Female
35349	4	23.23	Secondary	Female	2	2.73	8.65	27.01	0.86	42.97	9.6	35.5	2	4BC;3CB;	Biochemical pregnancy
35339	2	20.03	Secondary	Both	2	6.26	4.85	11.25	0.48	15.26	8	28	2	4BC;4CB;	Live birth 1	39+5	4000	Female	2，1miscarriage
35243	5	26.77	Primary	Both	2	3.95	8.4	7.83	0.68	33.02	12	30.4	2	4CB;4BC;	Live birth 2	36+4	2600/2650	Female/Female	Preterm birth
35221	3	23.42	Secondary	Female	2	5.44	12.86	14.33	0.57	32.9	9.5	29.8	2	4CB;4BC;	Live birth 2	34	2130/2200	Male/Female	Preterm birth
35160	1	22.48	Secondary	Both	2	3.84	7.18	14.86	0.27	59.53	8.6	28.2	2	4BC;4CB;	Biochemical pregnancy
35146	3	22.66	Secondary	Unexplained	1	6.25	4.58	14.25	0.56	48.25	9	30.5	2	4BC;4BC;	Live birth 2	33+4	2050/1700	Male/Female	Preterm birth
35100	2	18.83	Secondary	Unexplained	2	4.66	8.28	6.91	0.48	49.24	8.3	30.5	2	4BC;4CB;	No
34971	2	23.51	Primary	Both	2	4.35	5.84	8.53	0.69	38.58	8.8	29.1	2	4CB;3BC;	Live birth 1	41+1	3600	Male
34929	4	18.82	Secondary	Female	1	4.99	7.39	19.37	0.46	60.48	8	31	2	4CB;4CB;	8W-miscarriage
34859	1	17.47	Primary	Both	2	6.31	8.35	19.61	0.33	51.09	8.5	25.5	2	4CB;4BC;	Live birth 1	41+2	3850	Male
34705	5	30.12	Primary	PCOS（Female）	2	1.66	4.87	13.54	0.28	45.63	11	29.9	2	4BC;4CB;	No
34687	1	20.69	Secondary	Female	2	3.85	7.57	13.24	0.57	32.39	7	35.8	2	4CB;3BC;	Biochemical pregnancy
34663	2	19.15	Secondary	Unexplained	2	6.25	4.58	12.25	0.15	25.26	9.5	34	2	4BC;3BC;	Live birth 2	36+3	2400/2450	Male/Male	Preterm birth
34643	2	23.83	Primary	Both	2	7.08	6.59	13.26	0.21	67.7	12	28.2	2	4BC;4BC;	Biochemical pregnancy
34623	5	21.88	Primary	Unexplained	2	3.34	5.11	11.3	0.61	41.73	10.8	30.9	2	4BC;4CB;	Biochemical pregnancy
34607	1	25.39	Secondary	Unexplained	1	3.3	10.08	7.14	0.28	54.09	9	35.4	2	4CB;4CB;	No
34588	7	24.97	Primary	PCOS（Female）	2	6.26	5.77	13.51	0.57	52.7	8.9	29.7	2	4CB;4BC;	Biochemical pregnancy
34514	3	18.83	Secondary	Both	2	6.21	8.69	19	0.26	46.26	9.5	34.5	2	4BC;3BC;	No
34452	4	19.56	Secondary	Female	2	3.78	8.94	27.6	0.67	42.26	7.5	29.5	2	4CB;3BC;	Live birth 2	36+1	2000/2500	Male/Female	Preterm birth
34379	3	17.06	Primary	Unexplained	1	5.26	4.58	8.47	0.45	63.15	9.7	28.8	2	4BC;4CB;	Live birth 1	40	3250	Female
34285	3	26.67	Primary	Both	2	4.18	5.63	17.63	0.62	19.76	7	29.2	2	4BC;4CB;	8W-miscarriage
34114	14	21.64	Secondary	Both	1	15.11	5.79	7.89	0.29	75.35	12	25.5	2	4CA;4BC;	Live birth 2	34+1	1950/1750	Male/Female	Preterm birth
34070	6	21.88	Primary	Female	2	3.9	7.26	11.5	0.78	43.31	11	25.5	2	4CB;3BC;	Live birth 1	41+2	3450	Female
34003	1	23.05	Primary	Unexplained	1	8.58	6.41	15.85	0.84	33.49	8	33.3	2	5BC;4BC;	Live birth 2	37+2	3000/2600	Male/Female
33991	6	26.56	Primary	PCOS（Female）	1	8.19	7.09	6.32	0.48	44.93	10	31	2	4BC;3BC;	Live birth 1	39+3	3250	Male	GDM
33905	1	18.37	Secondary	Female	1	4.2	3.55	7.68	0.44	50.68	11	32.6	2	4BC;4BC;	Live birth 1	40+1	3000	Male	2，1miscarriage/GDM
33889	1	23.31	Secondary	PCOS（Female）	2	6.25	4.26	10.23	0.56	48.15	8	28.7	2	4BC;3BC;	Live birth 1	39+1	3600	Male
33847	1	23.62	Secondary	PCOS（Female）	2	1.92	6.43	29.79	0.42	27.92	9.1	32.2	2	4BC;4BC;	Live birth 1	39+1	3000	Female	2，1miscarriage/GDM
33758	13	25.34	Secondary	Female	2	3.65	9.95	5.95	0.21	46.25	8.7	35.6	2	4BC;4BC;	Live birth 1	39+3	4350	Male
33754	3	20.5	Secondary	Female	1	5.32	7.47	13.14	0.53	33.81	9.2	25.8	2	4BC;4BC;	Live birth 2	38+4	2600/2650	Male/Male
33744	1	20.7	Secondary	Unexplained	1	3.26	6.33	15.98	0.25	58.58	8.5	35.8	2	4BC;4BC;	No
33710	4	24.65	Secondary	PCOS（Female）	1	3.16	6.45	13.97	0.51	54.36	12	30.3	2	4BC;4BC;	8W-miscarriage
33707	1	20.06	Secondary	Female	2	2.71	6.49	8.51	0.33	58.2	7.5	30.2	2	4BC;4CB;	No
33703	2	26.35	Primary	Both	2	9.29	6.7	12.02	0.7	41.85	12	27.6	2	4BC;4BC;	Live birth 1	39+6	3800	Male
33659	5	17.19	Primary	PCOS（Female）	2	18.45	6.97	11.34	0.26	42.25	10.3	26.3	2	4BC;4BC;	12W-miscarriage
33618	4	23.81	Primary	Unexplained	2	6.25	8.26	10.26	0.45	58.15	7.9	31.8	2	4BC;4CB;	Live birth 1	34+3	2150	Male	Preterm birth/2，1miscarriage
33513	6	22.83	Primary	Both	1	6.96	4.5	11.97	0.61	32.11	13	26.8	2	6BC;4BC;	9W-miscarriage
33495	3	24.14	Secondary	Both	1	2.76	7.86	5.87	0.39	34.07	10	28.3	2	4BC;4BC;	Live birth 1	39+2	3450	Male
33438	3	19.14	Primary	PCOS（Female）	1	5.23	7.24	13.79	0.87	43.85	8.7	26.2	2	4BC;4BC;	Live birth 1	38+4	3350	Male	2，1miscarriage
33410	2	20.34	Primary	Both	1	20.62	6.02	13.17	0.7	61.18	10.2	26.6	2	4CB;4BC;	Live birth 1	39	3400	Female	2，1miscarriage
33386	1	22.05	Secondary	Female	2	2.51	6.77	13.06	0.81	31.48	9.1	34.8	2	4BC;5BC;	No
33371	6	22.6	Primary	Female	1	1.65	7.47	28.99	0.28	25.24	8.7	34	2	4BC;4CB;	No
33366	1	20.96	Primary	Unexplained	1	5.26	8.39	9.82	0.53	20.9	8.5	22.5	2	4BC;4BC;	14W-miscarriage
33360	2	23.63	Secondary	Female	2	2.21	3.68	8.62	0.36	53.81	7.3	31.6	2	4BC;4BC;	No
33355	1	20.55	Secondary	Unexplained	1	3.01	7.5	11.79	0.46	34.23	7.9	27.6	2	4BC;4CB;	Live birth 2	36+6	2590/2710	Male/Male	Preterm birth
33332	7	23.23	Primary	Both	1	6.49	6.79	23.61	0.24	26.35	8	30.6	2	4BC;4CB;	Biochemical pregnancy
33251	3	20.28	Primary	Female	1	4.76	8.96	11.27	0.34	44.17	8.2	27.8	2	4BC;4CB;	Biochemical pregnancy
33200	2	19.38	Primary	Female	1	3.5	7.17	7.89	0.38	38.07	10.7	25.8	2	3CB;4BC;	Live birth 1	41	3300	Female
33154	3	20.44	Secondary	Male	2	2.08	7.18	10.18	0.67	22.74	9	22.2	2	4BC;4BC;	Live birth 2	36+6	3150/2950	Male/Female	Preterm birth
33127	1	19.47	Secondary	Female	1	6.26	8.14	23.25	0.47	52.26	8	30.8	2	4BC;4CB;	Live birth 1	40+5	3740	Male
33102	6	21.23	Primary	Unexplained	2	5.25	5.65	27.6	0.49	57.19	8	25.4	2	5CB;4CB;	Live birth 1	39+3	4100	Male
33097	4	21.91	Primary	Both	2	6.4	7.26	23.01	0.43	45.84	11.2	30.4	2	4BC;3BC;	Live birth 1	40+3	3850	Female	2-1（tire reduction)/GDM
33085	2	22.77	Secondary	Female	2	4.27	6.84	12.33	0.79	40.72	9.1	31.7	2	4CB;4BC;	No
33010	4	24.68	Primary	PCOS（Female）	2	13.18	8.08	6.81	0.54	38.99	10.5	30	2	4BC;4BC;	Live birth 1	39	3050	Female
33005	2	20.57	Primary	Unexplained	1	6.26	8.25	11.25	0.47	25.69	10	32.2	2	3CB;4BC;	No
32975	5	23.23	Secondary	Both	2	3.33	8.71	8.02	0.49	26.99	9.5	32	2	4BC;4CB;	Live birth 2	34+2	2100/2100	Female/Female	monochorionic diamniotic twins/Preterm birth/gestational hypertension
32973	2	21.94	Primary	Both	2	5.58	8.67	26.43	0.5	51.15	9.5	30.9	2	3CB;4BC;	Live birth 1	36+4	2760	Male	Preterm birth
32953	3	25.39	Secondary	Female	2	4.28	3	7.11	0.35	68.26	8.5	34.6	2	4BC;4BC;	No
32927	3	25.91	Secondary	PCOS（Female）	2	3.75	6.25	10.07	0.39	21.23	9.2	32.1	2	4BC;4BC;	No
32873	4	21.78	Primary	Male	1	3.35	6.22	15.45	0.67	30.56	13.4	25.5	2	4BC;4BC;	Biochemical pregnancy
32811	1	24.44	Secondary	Female	2	2.37	6.52	19.98	0.63	49.12	9.8	33.8	2	4BC;4BC;	Live birth 2	37+1	2200/2450	Female/Female
32782	2	24.14	Secondary	Female	2	1.96	8.66	15.78	0.49	39.49	10.1	35.1	2	4BC;4BC;	Live birth 1	38+5	2850	Female
32749	1	18.36	Secondary	Female	2	7.65	9.43	25.84	0.83	53.43	9	30.5	2	4CB;3BC;	No
32737	3	19.2	Primary	PCOS（Female）	1	16.3	7.41	11.24	0.4	41.91	9	25.8	2	4BC;4CB;	9W-miscarriage
32729	5	25.46	Primary	PCOS（Female）	2	5.38	4.68	6.92	0.31	32.37	7	28	2	4BC;4BC;	No
32620	1	22.89	Secondary	Unexplained	2	4.82	5.95	9.95	0.41	32.7	9.4	34.9	2	4BC;4CB;	9W-miscarriage
32580	2	22.22	Secondary	PCOS（Female）	2	7.03	7.28	14.24	0.35	19.34	9.8	31.4	2	6CB;4CB;	Live birth 1	42+1	3800	Male
32527	1	23.44	Secondary	Unexplained	2	4.77	9.5	11.92	0.53	50.11	8.8	30.9	2	4BC;4CB;	No
32488	4	20.89	Secondary	Both	1	5.47	7.99	11.38	0.37	33.53	7.7	35.1	2	4CB;3BC;	Live birth 1	40+2	3600	Female
32421	4	26.17	Secondary	Both	1	4.84	5.57	20.76	0.57	48.15	8	28.1	2	4BC;3BC;	No
32382	5	23.14	Primary	Female	2	7	7	20.04	0.21	35.19	7.8	26.6	2	4CB;4AC;	Live birth 2	37+3	2800/2000	Female/Female	monochorionic diamniotic twins
32344	4	21.64	Primary	Female	2	2.73	12.28	16.75	0.59	28.69	9	23.6	2	4CB;4BC;	Live birth 1	39+3	3000	Female
32323	3	22.03	Secondary	Both	2	7.46	4.81	17.74	1.02	53.76	11.6	31	2	4BC;4BC;	Live birth 1	39+5	4653	Male	2，1miscarriage/GDM
32223	2	19.1	Primary	Female	2	9.37	6.29	11.73	0.24	53.86	7.8	29.3	2	4BC;5CB;	Live birth 2	38	2520/3150	Female/Female
32148	1	22.31	Primary	Female	1	2.13	2.39	18.19	0.87	25.16	7.3	30.5	2	4BC;4CB;	Live birth 1	37+5	2950	Male
32144	5	17.58	Secondary	Female	2	3.11	6.51	23.86	0.56	69.39	10.6	31.4	2	4BC;4BC;	No
32143	1	25.24	Secondary	Female	2	2.24	6.81	9.99	0.42	30.53	7.5	35.6	2	4BC;4BC;	Live birth 1	37+2	3750	Male
32132	3	20.43	Primary	PCOS（Female）	1	4.46	7.91	8.03	0.23	43.86	11.1	29.1	2	4BC;4CB;	No
32092	3	30.86	Primary	Female	2	3.56	7.78	12.56	0.35	42.03	9	27.7	2	4BC;3BC;	No
32063	1	22.06	Secondary	Unexplained	1	5.92	5.86	19.99	0.47	48.06	8	29.5	2	4CB;4AC;	Live birth 2	34+6	1750/2500	Male/Male	Preterm birth/GDM
32056	1	21.76	Secondary	Female	2	1.72	3.27	12.12	0.42	24.05	7.5	33.2	2	4AC;4BC;	Live birth 1	37+6	3150	Male
32010	4	25	Secondary	Female	2	9.74	5.49	14.58	0.93	66.62	9	23.9	2	4BC;4CB;	Live birth 2	38	3000/2200	Female/Female
31955	4	17.3	Primary	PCOS（Female）	2	6.83	8.64	11.27	0.64	63.47	8.4	32.5	2	5BC;6BC;	Live birth 1	40+3	3430	Female	2，1miscarriage
31926	5	20.5	Primary	Female	1	4.28	9.8	9.07	0.56	29.77	9.3	24.7	2	4BC;4CB;	No
31874	1	24.34	Secondary	PCOS（Female）	1	3	5.79	14.58	0.28	44.76	10	34.1	2	4CB;4BC;	Live birth 2	38+1	2600/2800	Female/Female	GDM
31853	1	22.27	Secondary	Both	1	4.2	5.63	12.25	0.56	35.15	10	27.3	2	4BC;4BC;	Live birth 1	38+5	2700	Female	Duplicate kidney（Birth defect)
31729	3	20.94	Primary	Both	2	3.78	5.99	9.56	0.5	27.99	8	34.2	2	3BC;4CB;	Live birth 1	34	3450	Male	Preterm birth/2，1miscarriage
31650	2	19.63	Secondary	Female	2	3.59	6.33	9.49	0.42	36.72	9	29.3	2	3BC;4BC;	Biochemical pregnancy
31636	2	17.72	Primary	Unexplained	2	3.48	6.07	11.64	0.48	56.46	9.4	27.6	2	4CB;4CA;	Live birth 1	35+1	2760	Male	single kidney malformation（Birth defect）
31516	1	20.08	Secondary	Female	2	2.08	5.67	13.49	0.52	51.89	7.5	30.7	2	4BC;4CA;	Live birth 1	38+3	2850	Female
31514	1	20.57	Secondary	Both	2	2.45	7.39	9.62	0.88	28.74	9.1	23.9	2	4CB;4CB;	No
31503	2	18.36	Secondary	Unexplained	2	2.32	5.02	11.73	0.69	33.16	10	29	2	4CB;4CB;	6W-miscarriage
31487	1	17.26	Primary	Female	1	4.88	5.79	17.95	0.7	61.1	8.3	27.7	2	4BC;5BC;	Live birth 2	39	2300/2100	Female/Female
31426	1	20.83	Primary	Both	2	4.35	5.09	7.9	0.35	72.57	12.4	29.1	2	4BC;3BC;	Live birth 1	38+6	3250	Male
31421	2	18.97	Primary	Both	2	4.64	8.57	25.01	0.71	43.01	8.5	28.9	2	4BC;4BC;	Live birth 2	37	2460/2950	Male/Female
31395	6	17.92	Primary	Unexplained	2	2.41	8.24	13.69	1.07	18.57	8	30.1	2	4CB;4CB;	7W-miscarriage
31381	3	26.78	Secondary	Unexplained	1	5.4	4.95	12.32	0.71	56.81	9	34.1	2	4BC;4CB;	No
31329	5	26.56	Primary	PCOS（Female）	2	3.4	4.15	8.91	0.76	51.46	10	26.3	2	4CB;4CA;	10W-miscarriage 2
31139	6	19.83	Primary	Male	1	4.68	7.95	7.16	0.52	37.76	9.3	27.2	2	4BC;3BC;	Live birth 2	36	2100/2250	Female/Female	Preterm birth
31085	2	20.83	Secondary	PCOS（Female）	2	8.55	6.23	15.96	0.67	44.84	7.7	32.6	2	4BC;4BC;	Live birth 1	41	3250	Male
31028	2	26.84	Secondary	PCOS（Female）	2	2.73	3.64	12.64	0.72	44.61	8	29.1	2	3BC;3BC;	No
30966	7	23.44	Primary	PCOS（Female）	1	4.99	3.22	6.89	0.49	43.51	8.2	32.3	2	3CB;4BC;	Biochemical pregnancy
30954	4	19.72	Primary	Female	2	4.42	11.18	20.08	0.5	38.5	8.3	30.7	2	4BC;4BC;	Ectopic pregnancy
30936	2	20.2	Secondary	Female	2	7.74	3.58	22.48	0.64	55.96	7	29.8	2	4AC;4BC;	Live birth 1	38+1	2800	Female
30904	3	20.03	Primary	Female	1	2.82	8.36	11.93	1.14	47.69	10.5	31.9	2	4CB;4BC;	Live birth 1	37+3	3250	Male
30844	2	29.82	Primary	Unexplained	2	2.6	6.04	22.97	0.86	27.94	10	34.8	2	4BC;4BC;	Biochemical pregnancy
30819	5	23.83	Primary	Female	2	1.63	5.99	11.77	1.14	42.11	11	25.7	2	4BC;4CB;	No
30802	2	20.81	Secondary	Unexplained	1	4.33	6.52	24.65	0.32	31.22	10.5	33.8	2	4BC;3BC;	Live birth 1	39+4	3300	Female
30732	3	22.6	Primary	Female	2	3.7	4.66	18.04	0.72	16.74	8.6	32	2	3BC;4BC;	No
30726	7	23.42	Secondary	Both	2	3.31	5.14	11.02	0.64	33.54	8.2	32.7	2	4BC;3BC;	Live birth 2	37+5	3150/3250	Male/Female
30676	2	18.37	Primary	Female	2	4.78	5.59	10.25	0.83	59.99	7.5	28.5	2	4BC;4BC;	Live birth 2	34+6	2100/2450	Female/Female	Preterm birth
30649	6	25.71	Primary	Female	2	2.62	5.39	10.25	0.89	49.49	7	24.7	2	4BC;4BC;	No
30538	5	18.36	Secondary	Female	2	4.98	5.31	13.4	0.98	49.99	7.5	25.6	2	4BC;4BC;	Biochemical pregnancy
30238	2	20.03	Secondary	Female	2	3.21	7.72	6.93	0.51	30.43	10.3	31.1	2	4BC;4BC;	No
30234	1	21.23	Secondary	Female	1	3.76	6.8	11.4	0.27	40.95	9	28.3	2	4BC;4BC;	Live birth 1	39+1	3350	Female
30217	4	24.44	Primary	Female	2	4.53	7.94	29.22	0.37	28.42	8.5	32.3	2	4BC;5BC;	15W-miscarriage
30208	3	22.55	Secondary	Female	2	5	8.2	25.99	0.72	46.3	8	31.3	2	4BC;4BC;	No
30137	5	19.95	Primary	PCOS（Female）	2	10.93	6.94	6.4	0.32	51.86	8.4	26	2	4CB;4BC;	Live birth 1	38+5	3200	Female
30082	4	28.98	Secondary	Female	2	6.23	5.47	11.25	0.45	26.15	9	30.9	2	4BC;4BC;	17W-miscarriage
30040	1	18.96	Secondary	Female	2	4.62	7.6	14.54	0.94	44.29	10	34	2	4BC;4BC;	Live birth 1	36	2450	Male	Preterm birth/2，1miscarriage
30007	2	18.04	Primary	Unexplained	1	8.89	13.34	11.25	0.31	29.99	8.5	32.9	2	4BC;4CB;	No
29927	1	18.52	Primary	Male	1	9.96	5.76	8.72	0.48	52.82	11.8	27.2	2	4BC;3BC;	Live birth 1	39+3	3600	Female
29851	2	21.08	Primary	Female	1	1.95	9.41	11.25	0.86	58.68	11	32.9	2	4CB;4CB;	Live birth 1	40	3600	Female
29622	2	20.55	Primary	Female	2	2.93	5.97	6.73	0.55	46.57	8	27.1	2	4BC;3BC;	No
29266	3	25.71	Primary	Female	1	6.25	8.47	10.25	0.46	52.13	8.5	30.8	2	4BC;3BC;	Live birth 1	40+3	3650	Female	2，1miscarriage
29143	3	19.43	Primary	PCOS（Female）	1	7.25	10.39	16.61	0.37	43.78	8.5	25.8	2	4BC;4CB;	Biochemical pregnancy
29059	4	26.49	Secondary	PCOS（Female）	2	2.07	5	10.93	0.48	42.8	9	31.3	2	4CB;4CB;	Live birth 1	38+6	2200	Male
28965	5	19.48	Secondary	Both	2	11.25	10.24	17.47	0.4	48.72	8.7	33.2	2	5BC;3CB;	20W-miscarriage
28892	8	24.67	Primary	Female	2	5.38	13.18	10.95	0.39	58.12	7	32.7	2	4BC;3BC;	No
28890	1	21.09	Secondary	Female	2	5.31	4.52	13.35	0.67	55.9	7.5	25.7	2	4BC;4BC;	No
28730	14	25.3	Primary	Female	2	1.39	3.55	4.82	0.42	56.26	9.2	34.4	2	4CB;4CB;	Biochemical pregnancy
28375	6	21.09	Secondary	Female	2	4.62	7.9	13.49	0.54	49.36	13	30.9	2	4BC;4BC;	Biochemical pregnancy
28235	2	20.31	Primary	Unexplained	2	5.64	7.68	16.53	0.46	52.72	10.1	32.5	2	4BC;4BC;	Live birth 1	39	3250	Male
28194	7	22.04	Secondary	Female	2	9.79	6.15	28.46	0.78	50.87	9	31	2	4BC;4CB;	Live birth 1	36+4	2650	Female	Preterm birth/2，1miscarriage
28098	5	18.37	Primary	PCOS（Female）	2	8.59	2.05	13.9	0.34	47.41	8	28.1	2	4CA;4BC;	Live birth 1	38+1	3300	Female
27897	1	19.33	Secondary	Female	1	6.28	9.25	11.26	0.47	54.12	9	32	2	3BC;4BC;	Live birth 1	40+2	3300	Female
27654	2	20.28	Primary	Female	2	6.52	6.15	7.26	0.26	30.74	8	28.5	2	4BC;4BC;	No
27486	2	16.61	Secondary	Female	2	4.33	9	18.18	0.28	57.47	8	24.5	2	4BC;4AC;	Ectopic pregnancy
26716	2	17.71	Secondary	Unexplained	2	5.2	8.65	11.33	0.55	36.67	10	32.9	2	4BC;3BC;	Live birth 1	39+5	3750	Male
26136	1	24.84	Secondary	Both	2	2.08	7.65	14.44	0.58	32.25	7.5	30.1	2	4CB;4CB;	Live birth 1	38+6	3600	Male
24476	3	32.32	Secondary	Female	2	5.6	6.61	13.22	0.87	46.29	8	34.4	2	3BC;3BC;	Live birth 1	27+5	3000	Male	Preterm birth/GDM
21194	3	22.58	Secondary	Unexplained	2	6.25	8.14	7.26	0.24	25.16	9	30.5	2	4BC;4CB;	Live birth 1	39+6	3150	Female
18135	3	20.06	Secondary	Unexplained	2	7.38	5.74	13.4	0.25	57.1	9	35.1	2	4BC;4BC;	Biochemical pregnancy
11504	2	22.73	Secondary	Female	2	8.66	17.78	11.34	0.59	37.54	9.5	32.4	2	4BC;3CB;	Live birth 1	38+3	3000	Female

## Sheet: high-quality double(D)
ID	Infertility duration	BMI	Infertility type	Cause of infertility	Transplant cycle	LH	FSH	PRL	P	E2	En	Age	the number of transferred blastocysts	blastocyst scoring	pregnancy outcomes	Neonatal birth age	Neonatal birth weight	Neonatal sex ratio	Special case
30267	6	21.93	Primary	Both	1	5.89	7.26	14.11	0.33	43.59	9	34.9	2	4BB;4BB;	Live birth 1	30+3	1400	Male	Preterm birth/2，1miscarriage
35408	3	17.15	Secondary	Female	1	5.26	9.58	10.25	0.48	52.12	8.5	33	2	4BB;4BB;	Live birth 2	36+6	2500/2500	Male/Female	Preterm birth/gestational hypertension
39364	1	17.48	Secondary	Unexplained	1	5.38	6.21	15.34	0.37	45.11	14.1	33.4	2	4BB;4BB;	Live birth 2	36	2200/2250	Male/Female	Preterm birth/gestational hypertension
33448	2	17.31	Primary	EMS（Female）	2	3.82	9.5	11.72	0.41	64.4	9.8	34.7	2	4BB;4BB;	Live birth 2	35+4	2300/1900	Female/Female	Preterm birth ICP
34183	1	22.31	Secondary	Female	2	16.53	8.04	12.73	0.53	54.09	7	32.2	2	4BB;4BB;	Live birth 2	35	2350/2300	Male/Male	Preterm birth GDM
38960	3	20	Primary	PCOS（Female）	1	7.42	5.57	8.81	0.67	32.81	12.8	24.4	2	4BB;4AB;	Live birth 2	36+5	2650/2500	Female/Female	Preterm birth
27784	1	21.67	Secondary	Both	1	6.71	10.25	7.72	0.64	64.99	9.6	29.5	2	4BB;4AB;	Live birth 2	36+4	2450/2750	Female/Female	Preterm birth
37049	2	22.38	Secondary	Female	1	10.39	9.29	28.8	0.74	49.42	8	34.7	2	3BB;4BB;	Live birth 2	36+3	2500/2550	Female/Female	Preterm birth
30730	2	20.94	Primary	PCOS（Female）	2	4.83	5.35	22.86	0.67	34.35	10	31.9	2	4BB;3BB;	Live birth 2	35+5	2050/2350	Female/Female	Preterm birth
6897	6	25.24	Secondary	PCOS（Female）	1	14.81	7.78	6.19	0.27	58.72	14	33.8	2	4BB;4BB;	Live birth 2	35+1	2000/1900	Female/Female	Preterm birth
36619	3	24.61	Primary	PCOS（Female）	2	7.09	5.36	12.64	0.69	32.54	9.1	30.1	2	4BB;4BB;	Live birth 2	30+6	2050/2050	Female/Female	Preterm birth
30060	2	22.04	Primary	Both	2	5.26	4.79	25.6	0.53	33.51	8	29.4	2	4BB;4BB;	Live birth 2	27+6	1000/1000	Female/Female	Preterm birth
27225	7	21.46	Secondary	Both	2	17.15	6.68	12.68	0.77	43.34	10	28.7	2	4BB;4BB;	Live birth 2	27+3	930/975	Female/Female	Preterm birth
34341	3	17.97	Secondary	Female	2	5.31	6.69	9.25	0.39	51.87	10	30.3	2	4BB;3BB;	Live birth 2	36+6	2800/2300	Male/Female	Preterm birth
28281	1	20.2	Secondary	Female	2	3.25	7.11	6.17	0.78	31.51	8.2	33.8	2	4AB;3AB;	Live birth 2	36+6	2700/2100	Male/Female	Preterm birth
9814	1	20.45	Secondary	Female	2	5.26	8.47	10.26	0.48	59.25	9	33.1	2	4AB;4AA;	Live birth 2	36+5	2900/2650	Male/Female	Preterm birth
39212	1	16.59	Secondary	Unexplained	1	15.92	9.93	13.6	0.29	32.22	7.5	32.9	2	4BB;3BB;	Live birth 2	36+5	2500/2350	Male/Female	Preterm birth
37680	5	22.2	Primary	Male	1	4.77	6.75	12.73	0.43	40.3	8.5	27.7	2	4BB;4BB;	Live birth 2	36	2650/2400	Female/Female	Preterm birth
10528	2	19.14	Secondary	Male	2	3.36	7.19	13.8	0.33	51.3	12	26.9	2	3AB;3BB;	Live birth 2	36+4	2650/3000	Male/Female	Preterm birth
35377	1	24.46	Primary	Female	1	4.35	9.72	17.87	0.46	59.1	11.3	26.2	2	4BB;4BB;	Live birth 2	36+3	3050/2100	Male/Female	Preterm birth
17135	1	20.03	Secondary	Female	1	13.48	7.16	11.18	0.5	37.46	10.1	26.5	2	4AA;4BA;	Live birth 2	36+1	2500/2500	Male/Female	Preterm birth
39036	10	16.94	Primary	Female	1	5.87	7.95	11.5	0.21	38.03	8	30	2	4BB;3BB;	Live birth 2	35+5	2600/2400	Male/Female	Preterm birth
37397	2	26.17	Secondary	Both	1	4.79	8.63	9.23	0.21	56.39	9.5	30.7	2	4BB;4BB;	Live birth 2	35+5	2350/2250	Male/Female	Preterm birth
36887	2	18	Primary	PCOS（Female）	1	2.64	9.45	14.3	0.4	31.43	8	29.6	2	4BB;4BB;	Live birth 2	35+1	1955/2660	Male/Female	Preterm birth
33397	3	19.56	Secondary	Unexplained	2	2.91	9.54	22.63	0.93	68.35	7	33.4	2	4AB;4AB;	Live birth 2	34+6	2450/2250	Male/Female	Preterm birth
31184	1	22.6	Secondary	Both	1	2.4	5.05	23.7	0.44	34.77	8.8	27	2	4AB;4BB;	Live birth 2	34+5	2500/2400	Male/Female	Preterm birth
31820	10	24.14	Primary	Female	1	4.62	7.64	25.5	0.22	52.04	12.2	33.7	2	4BB;5BB;	Live birth 2	34+5	2350/1500	Male/Female	Preterm birth
37275	4	24.56	Primary	PCOS（Female）	1	12.23	6.57	7.56	0.55	49.86	10.4	27.6	2	4BB;4BB;	Live birth 2	34+4	1700/2200	Male/Female	Preterm birth
31948	10	20.81	Primary	Female	2	2.57	6.85	22.86	0.43	40.18	7.2	34.4	2	4BB;3BB;	Live birth 2	34+3	1550/2250	Male/Female	Preterm birth
32139	1	19.29	Secondary	Both	1	14.6	6.24	14.51	1	47.6	9	35.2	2	4BA;4BB;	Live birth 2	33+3	2120/2140	Male/Female	Preterm birth
31536	3	26.04	Primary	Both	1	9.7	5.78	7.36	0.53	45.88	8.8	31.5	2	4BB;4BB;	Live birth 2	27+1	1050/1000	Male/Female	Preterm birth
29039	4	24.77	Primary	Both	1	3.19	6.56	22.56	0.63	33.55	7	32.4	2	4AB;4BB;	Live birth 2	36+5	3150/1800	Male/Male	Preterm birth
30681	6	19.78	Secondary	Female	1	3.97	6.63	20.19	0.47	42.37	7	34.9	2	4BB;4BB;	Live birth 2	36+4	2600/2500	Male/Male	Preterm birth
29676	2	17.63	Primary	Male	1	3.87	9.95	12.96	0.89	61.45	7.5	32	2	4BB;4BA;	Live birth 2	36+4	2250/2300	Male/Male	Preterm birth
29988	1	20.2	Secondary	Both	1	6.23	8.47	10.26	0.49	52.14	9.2	33.9	2	4BB;4BA;	Live birth 2	36+4	2250/2300	Male/Male	Preterm birth
30644	3	20.06	Primary	Male	2	7.65	5.63	10.25	0.48	65.14	8.5	31	2	4BB;4BB;	Live birth 2	36+1	2500/1800	Male/Male	Preterm birth
33591	1	19.78	Secondary	Female	2	4.44	8.76	25.83	0.51	47.27	9	32.9	2	4AA;4AA;	Live birth 2	35+4	2150/2250	Male/Male	Preterm birth
35040	1	18.75	Secondary	Unexplained	2	2.45	7.17	25.82	0.69	38.64	8	30.1	2	4BB;4BB;	Live birth 2	35+1	2500/2200	Male/Male	Preterm birth
34348	1	19.81	Secondary	PCOS（Female）	2	5.67	6.81	12.02	0.43	37.55	8	33.7	2	4BB;4BB;	Live birth 2	34+6	2400/2600	Male/Male	Preterm birth
35038	6	19.02	Primary	Both	1	18.02	6.88	6.2	0.37	34.72	8	28.4	2	4BB;3BB;	Live birth 2	29+5	1200/1500	Male/Male	Preterm birth
28114	1	20.76	Secondary	Both	2	3.35	6.55	15.08	0.47	53.77	8.4	34.3	2	4AB;4BB;	Live birth 2	36	2600/2500	Male/Male	Preterm birth
21097	4	24.46	Secondary	Both	2	10.39	5.61	8.57	0.44	56.2	8.5	34.6	2	4AB;3BB;	Live birth 1	29+4	1350	Female	Preterm birth
39276	4	20.7	Primary	Unexplained	2	6.28	7.85	6.25	0.48	36.47	8	30.6	2	4BB;4BB;	Live birth 1	36+1	2750	Male	Preterm birth
27971	10	20.4	Secondary	Female	2	3.94	9.77	8.64	0.52	53.21	13	35.3	2	4BA;4AB;	Live birth 1	32+5	2150	Male	Preterm birth
30603	8	22.31	Primary	Unexplained	1	3.94	7.53	12.57	0.49	42.52	9	35.2	2	4AB;5BA;	Live birth 1	36	2300	Male	Preterm birth
36735	2	18.36	Primary	Both	1	7.15	5.28	6.64	0.43	51.74	9	27.5	2	4BB;4BB;	Live birth 1	40+1	3650	Female	2，1miscarriage
29830	1	22.27	Secondary	Female	1	5.8	8.56	7.75	0.56	40.23	10.6	23.9	2	4BB;3AB;	Live birth 1	41+6	3810	Male	2，1miscarriage
31256	1	19.72	Secondary	Both	1	3.58	7	12.72	0.48	40.91	9.3	35.5	2	4BB;4BB;	Live birth 1	40+6	3000	Male	2，1miscarriage
30097	1	26.22	Secondary	Female	2	3.76	6.85	10.4	0.41	37.04	9.9	30.3	2	5BB;3BB;	Live birth 1	40+3	3340	Male	2，1miscarriage
37938	4	28.25	Primary	PCOS（Female）	1	4.39	5.9	14.44	0.7	40.76	9	31.5	2	4BB;4BB;	Live birth 1	40+1	3300	Male	2，1miscarriage
34389	4	19.83	Secondary	Female	2	4.47	5.49	12.7	0.29	50.46	8	30.8	2	4BB;4BB;	Live birth 1	39+6	3650	Male	2，1miscarriage
36694	1	23.51	Secondary	Both	1	3.33	6.22	27.05	0.88	29.95	8.5	29.5	2	4BB;3BB;	Live birth 1	39+4	4100	Male	2，1miscarriage
39538	1	23.59	Primary	PCOS（Female）	1	14.46	7.89	6.91	0.62	59	8	33	2	4BB;5BB;	Live birth 1	39+3	3000	Male	2，1miscarriage
35263	3	19.81	Secondary	Unexplained	1	2.73	6.63	10.23	0.38	45.3	7	31.5	2	4BB;4BB;	Live birth 1	39+1	3910	Male	2，1miscarriage
31162	1	20.08	Secondary	Female	1	3.34	5.1	10.09	0.56	51.85	10.6	23.3	2	4BB;5BB;	Live birth 1	38+4	2350	Male	2，1miscarriage
37063	5	20.94	Primary	PCOS（Female）	1	5.78	9.26	23.94	0.6	56.23	7.5	32.7	2	4BB;4BB;	Live birth 1	38+1	3500	Male	2，1miscarriage
32226	2	22.89	Secondary	Female	2	2.51	5.09	19.05	0.52	61.86	8	29.4	2	4BA;4BB;	Live birth 1	38+2	3550	Female	2，1miscarriage
29357	1	23.83	Secondary	Female	1	4.65	8.88	23.25	0.62	36.57	8	26.6	2	4BB;4BB;	Live birth 1	41	3100	Female	2，1miscarriage
16371	2	23.15	Secondary	EMS（Female）	2	2.46	7.12	17.8	0.35	40.1	8.5	32	2	4AA;3AB;	Live birth 1	38+2	2900	Male	2-1（tire reduction)/GDM
27957	2	16.44	Primary	Female	2	2.85	7.62	17.9	0.78	43.41	8	31.7	2	4BB;4BB;	Live birth 1	39+6	3050	Male	2-1（tire reduction)
22451	2	16.02	Secondary	Female	2	5.67	8.17	18.4	0.35	48.5	7.3	25.6	2	4AB;4BB;	Live birth 1	39+1	3250	Male	2-1（tire reduction)
23232	2	23.44	Secondary	Both	2	2.48	6.09	10.53	0.72	52.23	12	26.8	2	4BA;4BB;	Live birth 1	38+5	3450	Male	2-1（tire reduction)
34353	1	18.73	Secondary	Female	2	6.25	8.47	11.25	0.64	25.14	8.5	30.7	2	4BB;3BB;	Live birth 1	38+1	3350	Male	2-1（tire reduction)
31565	1	19.15	Secondary	Both	2	3.63	5.41	18.56	0.68	57.7	7	34.3	2	4AB;4AB;	Live birth 1	38	3150	Male	2-1（tire reduction)
34287	4	18.73	Primary	Both	1	11.66	10.76	20.68	0.44	37.8	9.4	29.4	2	4BA;4BB;	Live birth 2	37+3	2650/2620	Male/Male	Birth defect
38433	5	28.76	Primary	Both	2	4.28	6.82	6.71	0.3	28.91	7	26.8	2	4BB;4BB;	Live birth 1	37+5	1900	Female	gestational hypertension
34323	4	22.04	Secondary	Female	2	4.3	5.21	15.34	0.22	40.38	9	33.1	2	4BB;6BB;	Live birth 1	40+5	3650	Female	Birth defect
35965	3	28.69	Primary	Both	1	6.3	8.02	5.09	0.4	34.38	9	28.2	2	4BB;4BB;	Live birth 2	37+1	3250/2350	Female/Female	GDM
29825	3	22.21	Primary	Female	2	3.85	5.23	7.64	0.72	24.72	11	28.2	2	4BB;3BB;	Live birth 2	37+1	2900/3000	Male/Male	GDM
36083	2	23.05	Primary	PCOS（Female）	1	10.14	5.57	16.39	1.02	53.28	7	27.9	2	4AB;4BB;	Live birth 1	41	3400	Male	GDM
33119	2	22.66	Secondary	PCOS（Female）	2	5.45	5.76	17.43	0.21	32.76	8	33	2	5BB;4BB;	Live birth 2	40+3	2750/2550	Male/Female
37719	4	21.33	Secondary	Female	2	3.49	10.01	9.79	0.98	38.66	7	30.8	2	4BB;4BB;	Live birth 2	38+6	2650/2950	Female/Female
23776	3	16.33	Secondary	Both	2	5.26	4.14	9.47	0.46	51.14	10	31.7	2	4AB;4BB;	Live birth 2	38+1	2500/2750	Female/Female
30015	1	21.09	Secondary	Female	2	6.67	5.22	12.08	0.28	37.02	9.7	25.7	2	4BB;4BA;	Live birth 2	38+6	2500/2550	Male/Female
29214	1	18.59	Secondary	Both	2	8.28	7.04	13.56	0.37	28.48	8	31.9	2	4AB;4BB;	Live birth 2	38+3	2750/2500	Male/Female
35436	4	26.04	Primary	Both	1	8.28	6.93	17.54	0.33	30.77	10	31.2	2	4AB;4BB;	Live birth 2	37+6	2600/2800	Female/Female
36999	1	21.64	Secondary	Female	1	7.23	6.56	17.23	0.44	26.26	8	31.7	2	4BA;4BB;	Live birth 2	37+3	2600/2600	Female/Female
36126	1	20.28	Secondary	Female	1	3.4	7.27	8.17	0.6	33.87	9.5	29	2	4BA;4BB;	Live birth 2	38+2	3000/2000	Male/Female
34563	5	20.08	Primary	Both	1	7.23	5.37	24.01	0.46	51.04	9.2	32.3	2	4BA;4BB;	Live birth 2	38+1	2850/2300	Male/Female
35192	2	23.63	Primary	PCOS（Female）	1	4.45	5.7	7.73	0.36	44.98	12.5	27.2	2	4BA;4BB;	Live birth 2	38+1	2400/2450	Male/Female
37875	3	21.26	Primary	Both	1	3.42	6.35	17.18	0.41	21.55	7	21.9	2	4BB;4BB;	Live birth 2	37+6	3300/3500	Male/Female
23596	4	17.31	Primary	Unexplained	1	3.93	7.75	17.83	0.56	52.05	10.7	30.9	2	4AB;4AB;	Live birth 2	37+6	2740/2650	Male/Female
33853	2	27.64	Primary	Both	1	3.89	6.62	18.59	0.55	40.72	12	27.1	2	4BB;4BB;	Live birth 2	37+6	2700/2600	Male/Female
37325	4	20.32	Secondary	Both	1	6.25	9.87	4.26	0.45	25.12	8	23.8	2	4BB;4BB;	Live birth 2	37+6	2450/3200	Male/Female
25925	1	21.06	Secondary	Female	2	2.25	6.98	7.52	0.34	67.51	7	35	2	4BA;4BB;	Live birth 2	37+6	2450/2900	Male/Female
29882	2	26.03	Secondary	Female	1	2.52	7.75	11.64	0.65	48.16	9	27.5	2	4BA;4BB;	Live birth 2	37+5	3150/3750	Male/Female
29003	2	19.95	Primary	EMS（Female）	2	4.26	7.94	17.27	0.64	60.93	15	30.9	2	4AB;4BB;	Live birth 2	37+4	2700/2800	Male/Female
32984	1	24.67	Primary	Female	1	6.25	8.47	10.26	0.58	25.26	9.5	29.4	2	4BB;4BB;	Live birth 2	37+3	3150/2350	Male/Female
38416	1	18.03	Secondary	Both	2	18.3	7.56	9.06	0.4	48.15	10	32	2	4BA;4BB;	Live birth 2	37+3	2650/2850	Male/Female
33922	5	20.96	Primary	Female	1	3.68	5.38	10.5	0.29	58.57	7	27.3	2	4BA;3BB;	Live birth 2	37+3	2600/2700	Male/Female
32342	2	23.44	Secondary	Female	2	3.17	5.96	13.81	0.61	34.46	9.3	26.8	2	4AA;4AB;	Live birth 2	37+2	2450/3050	Male/Female
32102	2	22.03	Secondary	Female	2	16.78	5.25	14.99	0.58	61.47	7	32.9	2	4BB;4BB;	Live birth 2	37+2	1850/2050	Male/Female
35412	3	26.5	Primary	Female	1	3.35	6.61	9.46	0.44	62.21	9.5	33.6	2	4BB;4BB;	Live birth 2	37+1	2700/3000	Male/Female
30748	9	23.44	Primary	PCOS（Female）	1	17.6	7.18	7.02	0.29	44.65	8.5	30.1	2	4BB;5BB;	Live birth 2	37+1	2500/2850	Male/Female
36361	1	20.31	Secondary	Female	2	3.91	7.21	15.48	0.31	42.81	9	34.9	2	4BB;5BB;	Live birth 2	38	2750/2450	Female/Female
32463	6	17.99	Primary	Unexplained	1	4.49	9.88	16.57	1.08	56.24	7.6	35.5	2	4BB;4BB;	Live birth 1	41+4	3550	Female
29103	1	16.9	Secondary	Female	1	9.14	5.99	23.21	0.71	47.43	7.5	34.9	2	4BB;4BB;	Live birth 1	41+4	3350	Female
34220	3	26.04	Primary	Female	2	2.94	6.02	19.69	0.65	49.19	9	25.3	2	4BB;3BB;	Live birth 1	40+6	3680	Female
30837	1	27.18	Primary	PCOS（Female）	1	8.9	8.17	12.15	0.79	65.96	10	26.3	2	4BB;4BB;	Live birth 1	40+6	3200	Female
30868	3	19.49	Primary	Female	1	5.67	6.82	10.54	0.51	44.43	8	28.1	2	4BA;4BB;	Live birth 2	39	3000/2950	Male/Female
35288	2	19.14	Primary	Unexplained	2	5.41	7.95	11.89	0.45	53.9	9	31.9	2	4BB;3BB;	Live birth 1	40+5	4200	Female
37896	2	22.03	Secondary	Female	2	5.98	5.7	9.79	0.51	67.85	7	29.6	2	4BB;4AB;	Live birth 1	40+5	3900	Female
29839	4	17.78	Primary	Female	2	2.48	8.32	8.15	0.95	69	10	30	2	4BB;4BB;	Live birth 1	40+5	3550	Female
34891	1	23.15	Secondary	Female	1	4.36	8.82	12.07	0.44	48.77	8.9	32.4	2	4BA;4BB;	Live birth 2	38+3	3000/3500	Male/Male
34397	5	19.56	Primary	Unexplained	2	8.21	4.65	17.83	0.63	52.92	10	33.5	2	4AB;4BB;	Live birth 1	40+5	2920	Female
33721	3	19.98	Secondary	Female	1	4	7.78	9.56	0.23	67.32	11	33.8	2	4BB;4BB;	Live birth 1	40+3	3750	Female
31261	2	20.7	Secondary	Both	1	4.96	5.21	20.4	0.35	36.69	7.5	32.5	2	4BB;4BB;	Live birth 2	38+3	3000/3200	Male/Male
38652	1	21.36	Secondary	Female	2	3.75	5.38	10.36	0.58	58.62	8.3	25	2	4BB;4BB;	Live birth 2	37+6	3100/2950	Male/Male
37950	3	20.03	Secondary	EMS（Female）	1	7.94	6.58	12.94	0.49	34.91	9	29	2	4BB;4BB;	Live birth 2	37+5	2650/2450	Male/Male
31383	2	22.35	Secondary	Both	1	6.74	5.88	8.37	0.39	34.01	7	33.2	2	4BA;4BB;	Live birth 1	40+3	3450	Female
28646	2	19.23	Secondary	Male	2	4.3	10.82	10.85	0.24	42.95	9	31.2	2	4BA;4BB;	Live birth 2	37+5	2500/2550	Male/Male
28876	3	21.79	Primary	Unexplained	2	8.56	8.47	12.14	0.48	36.47	9	30.5	2	4BB;4BA;	Live birth 2	37+4	3080/3080	Male/Male
31402	4	19.98	Secondary	Both	1	3.53	5.44	8.13	0.54	30.16	13.1	29.9	2	4BB;4BB;	Live birth 2	37+4	2550/2650	Male/Male
37762	4	21.78	Primary	Female	1	6.25	7.82	18	0.53	40.35	8	30.8	2	4AB;4BB;	Live birth 2	37+3	2650/2900	Male/Male
37734	4	20.45	Primary	Unexplained	1	7.04	6.27	6.2	0.45	54.44	12	29.8	2	4BB;5BB;	Live birth 1	40+2	2800	Female
32197	4	22.31	Primary	PCOS（Female）	1	5.09	7.21	8.95	0.72	22.59	10.5	26.7	2	4BB;4BB;	Live birth 1	40+1	3700	Female
30028	1	20.81	Secondary	Unexplained	1	10.26	5.26	11.45	0.48	25.62	11	29.2	2	4AA;4BB;	Live birth 2	37+3	2600/2650	Male/Male
30214	3	23.23	Primary	Male	2	6.25	8.47	10.26	0.47	45.23	9	31.6	2	4BB;4BB;	Live birth 2	37+3	2600/2600	Male/Male
36018	1	21.77	Primary	Both	1	6.25	8.47	10.26	0.25	54.78	7.5	23.2	2	4BA;4BB;	Live birth 2	37+2	3400/3200	Male/Male
36461	1	17.04	Secondary	Unexplained	1	3.23	6.48	12.76	0.46	38.84	9	25.4	2	4BA;4BB;	Live birth 1	39+6	3400	Female
29931	6	22.22	Secondary	Female	1	10.99	7.47	5.82	0.49	32.56	7.2	26.9	2	4BB;4BB;	Live birth 2	37+2	2950/2500	Male/Male
30920	3	17.85	Primary	PCOS（Female）	1	4.71	5.62	11.41	0.48	42.04	11.1	28.7	2	6BB;4BB;	Live birth 2	37+2	1700/2350	Male/Male
37113	10	25.81	Primary	PCOS（Female）	1	10.27	5.47	12.53	0.36	32.07	7	26.6	2	4BA;4BB;	Live birth 2	37+1	2800/2850	Male/Male
36233	3	23.88	Primary	PCOS（Female）	1	3.24	5.98	13.17	0.57	28.38	10.9	24.3	2	4BB;4BB;	Live birth 1	39+5	3710	Female
35198	1	16.45	Secondary	Both	2	2.61	9.7	14.67	0.27	32.5	7.6	27.7	2	4BA;4BB;	Live birth 1	39+5	3500	Female
29390	2	23.94	Primary	Male	2	2.05	7.13	24.51	0.78	31.91	8.7	31.3	2	4BB;4BB;	Live birth 2	37	2350/2450	Male/Male
29272	3	26.56	Primary	Female	2	5.21	5.07	12.53	0.57	30.58	10	31	2	4BB;4BA;	Live birth 1	39+3	3800	Female
37554	1	22.27	Secondary	Female	1	6.25	9.48	10.23	0.48	52.12	9	32.3	2	4BB;4BB;	Live birth 1	39+2	3100	Female
32950	1	23.03	Secondary	Female	2	1.97	5.65	15.81	0.49	28.38	11	29.2	2	4BA;4BB;	Live birth 1	41+1	3600	Male
28810	6	21.48	Primary	Unexplained	1	7.21	7.33	15.4	0.54	30.59	9.3	33.3	2	4BB;4BB;	Live birth 1	40+6	3700	Male
38276	2	19.92	Primary	Male	2	3.49	5.64	17.38	0.41	77.73	8.5	24.4	2	4BB;4BB;	Live birth 1	40+5	3600	Male
27360	5	17.69	Secondary	Female	2	7.45	8.42	11.64	0.55	46.8	9	32	2	4BB;4BB;	Live birth 1	40+5	3150	Male
28656	3	18.96	Primary	Male	1	3.87	7.25	25.04	0.73	26.68	13	27.4	2	4BB;4BB;	Live birth 1	40+5	3150	Male
30511	3	20.4	Primary	Female	1	4.45	5.11	19.25	0.7	56.73	10.5	29.4	2	4BB;4BB;	Live birth 1	40+5	3000	Male
37233	1	26.62	Primary	PCOS（Female）	1	3.63	5.59	21.23	0.92	20.27	11	21.8	2	4BB;3BB;	Live birth 1	39+1	4070	Female
33873	8	18.75	Primary	Both	1	3.83	6.82	24.03	0.55	52.42	12	30.9	2	4BB;4BB;	Live birth 1	40+3	4000	Male
27851	1	16.46	Primary	Both	2	7.67	7.01	12.23	0.48	42.24	11	23.4	2	4BB;4BB;	Live birth 1	40+3	3480	Male
36565	3	19.63	Primary	Both	1	4.54	6.71	14.43	0.45	46.25	7	23.2	2	4BB;4BB;	Live birth 1	40+3	3350	Male
35228	5	18.29	Primary	Both	1	4.87	8.8	20.81	0.81	53.21	7	26.3	2	4BB;4BB;	Live birth 1	40+2	4200	Male
33233	3	26.67	Secondary	Both	1	3.73	7.92	12.66	0.61	29.43	9.3	27.3	2	4BB;4BB;	Live birth 1	40+2	4000	Male
36991	7	22.64	Primary	PCOS（Female）	2	4.52	4.34	8.71	0.26	31.8	7.5	34.4	2	4AB;4BB;	Live birth 1	39+1	2350	Female
37371	3	17.31	Primary	Both	1	7.19	5.38	27.27	0.27	48.99	9.5	26.6	2	4BB;4BB;	Live birth 1	40+2	3500	Male
28492	2	19.98	Secondary	Female	2	4.93	6.19	10.22	0.78	56.22	10	28	2	3BB;4AB;	Live birth 1	40+1	3700	Male
37989	1	23.51	Secondary	Unexplained	1	5.56	2.25	12.15	0.45	51.23	7	32.1	2	4BB;4BB;	Live birth 1	40+1	3600	Male
33970	3	21.5	Primary	Both	2	6.06	6.85	9.81	0.41	39.39	13	27.2	2	4AB;4BA;	Live birth 1	40+1	3550	Male
31908	3	21.23	Secondary	Male	2	1.84	5.28	22.43	0.57	47.81	7.8	32.5	2	4BB;3BB;	Live birth 1	38+6	3850	Female
32033	1	18.82	Primary	Female	1	6.25	4.85	11.26	0.48	52.12	9	31	2	4BB;4BB;	Live birth 1	40+1	3485	Male
33955	4	19.56	Secondary	Both	2	3.05	5.24	14.15	0.4	37.98	10	24.4	2	4BB;3BB;	Live birth 1	39+6	3800	Male
28843	4	18.96	Secondary	Both	1	6.25	4.78	11.28	0.47	56.12	8	27	2	4BB;4BB;	Live birth 1	39+6	3500	Male
39675	2	28.04	Secondary	Both	1	3.55	7.66	10.43	0.52	45.2	7	23.1	2	4BB;3BB;	Live birth 1	38+6	2600	Female
35632	1	18.14	Primary	Both	2	2.09	7.4	7.05	1.01	64.57	10.5	24.5	2	4BB;4BB;	Live birth 1	39+5	3640	Male
32012	4	19.14	Primary	Male	1	2.92	5.36	6.94	0.31	63.67	8.8	25.1	2	4AB;4AB;	Live birth 1	39+5	3550	Male
34940	5	22.27	Secondary	Both	2	6.9	7.34	27.9	0.48	34.81	10.8	31	2	4BB;4BB;	Live birth 1	39+5	3451	Male
29585	4	20.08	Secondary	Both	1	4.39	3.73	15.03	0.53	67.93	7	27	2	4AB;4BB;	Live birth 1	38+5	3050	Female
31766	5	20.96	Secondary	Both	2	14.19	5.09	18.35	0.85	51.22	7.2	28	2	4BB;4BB;	Live birth 1	39+5	3300	Male
37237	1	21.48	Secondary	Female	1	6.14	7.41	29.73	0.33	27.97	9	23.9	2	4BB;4BB;	Live birth 1	39+4	3700	Male
21844	5	26.04	Secondary	Unexplained	2	2.57	5.49	5.84	0.27	32.53	7.4	34.9	2	5BB;4BB;	Live birth 1	38+5	3030	Female
35304	1	22.89	Secondary	Female	1	3.82	6.79	14.99	0.59	62.16	10	32.7	2	4BB;4BB;	Live birth 1	39+4	3590	Male
33281	1	22.89	Secondary	Female	2	2.61	6.03	17.71	0.4	28.59	7.5	31.7	2	4BB;4BB;	Live birth 1	39+1	4300	Male
36637	4	19.92	Primary	Unexplained	1	1.64	8.21	10.06	0.78	34.22	10	30.3	2	4BB;4BB;	Live birth 1	39+1	3300	Male
21391	5	19.83	Secondary	Female	2	2.1	5.71	8.21	0.45	40.76	9.1	31.4	2	4AB;4BB;	Live birth 1	38+4	3000	Female
38443	2	21.23	Primary	Female	1	6.23	9.54	10.23	0.45	32.32	11	30.7	2	4BB;4BB;	Live birth 1	38+3	3100	Female
35200	5	21.08	Secondary	Female	2	2.9	6.82	8.72	0.39	42.78	9.6	33.3	2	4BB;4BB;	Live birth 1	39+1	3250	Male
36112	2	18.43	Primary	PCOS（Female）	1	3.34	7.3	13.14	0.55	65.72	11	31.6	2	4BB;4BB;	Live birth 1	38+3	3002	Female
23261	1	19.47	Secondary	Unexplained	2	7.3	4.33	9.93	0.66	46.22	7.5	25.5	2	4BA;4BB;	Live birth 1	39+1	3150	Male
39596	1	18.66	Secondary	Female	2	6.58	10.26	4.74	0.56	25.12	7.5	28.8	2	4AB;4BB;	Live birth 1	38+5	3000	Male
36483	4	18.49	Primary	Unexplained	2	7.88	7.45	12.75	0.58	44.07	8.2	32.1	2	4AA;4AA;	Live birth 1	38+4	3950	Male
28905	1	26.08	Secondary	Unexplained	2	1.76	4.8	8.06	0.48	44.34	11	32.8	2	4BB;4BB;	Live birth 1	38+4	3600	Male
35317	4	24.78	Primary	Both	1	1.7	2.2	11.24	0.66	64.19	10	32.1	2	4BB;4BB;	Live birth 1	38+2	3900	Male
28112	1	21.09	Secondary	Female	2	3.86	5.79	15.65	0.44	48.18	7	34.6	2	4AB;4BB;	Live birth 1	38+1	3450	Male
33454	3	22.49	Secondary	Both	2	6.25	4.87	9.58	0.48	45.12	8	24.3	2	4BB;5BB;	Live birth 1	38+1	3400	Male
32646	4	23.44	Primary	Female	2	2.37	3	6.87	1.01	39.81	11	31.1	2	4BB;3BB;	Live birth 1	38+1	2710	Female
25748	1	19.63	Primary	Male	2	2.6	4.4	8.21	0.42	43.79	9	35.1	2	4BB;4AB;	Live birth 1	37+4	2480	Female
30997	1	21.23	Primary	PCOS（Female）	1	23.1	9.93	14.62	0.53	26.35	8.1	27.8	2	4BB;4BB;	Live birth 1	37+2	3000	Male
27236	3	24.31	Primary	PCOS（Female）	1	2.75	5.9	13.28	0.48	35.92	10.3	30.6	2	4BB;3BB;	Live birth 1	37+1	3503	Male
33275	6	27.48	Primary	Both	2	2.71	5.94	6.38	0.38	26.44	9.5	30.2	2	4BA;4BB;	Live birth 1	37+1	4350	Female
33392	2	21.26	Primary	Male	1	5.96	9.39	24.1	0.35	19.88	7	29.3	2	4BB;4BB;	Live birth 1	41	3354	Female
37884	5	19.4	Secondary	Both	2	5.26	5.6	9.53	0.54	32.95	8.5	32.5	2	4BB;4BB;	Live birth 1	41	3600	Male
19287	1	17.97	Secondary	PCOS（Female）	2	7.46	5.52	10.23	0.9	63.4	9	31.4	2	4BB;4BB;	Live birth 1	40	3850	Male
36321	2	24.22	Secondary	Both	1	2.66	4.32	13.5	0.62	50.16	8.5	24.8	2	4BB;4BB;	Live birth 1	40	3800	Male
33674	7	18.67	Primary	Unexplained	1	4.03	8.4	17.54	0.52	42.6	11	29.1	2	4BB;4BB;	Live birth 1	40	3150	Male
34109	2	21.48	Primary	Both	2	2.51	8.05	27.52	0.44	47.79	10	35.7	2	4BB;3BB;	Live birth 1	39	3740	Male
31556	2	19.82	Primary	PCOS（Female）	1	6.36	8.09	16.52	0.6	76.07	9	30.6	2	3BA;4BB;	Live birth 1	40	2580	Female
39454	5	27.83	Secondary	Female	1	1.94	5.57	5.97	0.47	23.04	14	23	2	4BB;4BB;	Live birth 1	39	3450	Male
40001	1	21.22	Secondary	PCOS（Female）	1	16.86	6.13	6.1	1.12	31.5	8	29.4	2	4BB;4BB;	Live birth 1	38	2750	Female
28789	3	17.9	Primary	Unexplained	2	1.59	2.28	17.63	0.35	21.65	10.3	30.1	2	4BB;5BB;	Live birth 1	39	3200	Male
31404	1	25.2	Primary	PCOS（Female）	2	6.3	4.26	11.33	0.88	48.38	8.1	26.2	2	5BB;5BB;	Live birth 1	39	3200	Male
8657	10	25.97	Primary	Female	2	3.9	6.19	14.75	0.34	15	7.1	35.4	2	3BB;3BB;	Biochemical pregnancy
9093	1	18.43	Secondary	Female	2	2.78	5.44	23.83	1.07	29	8	35.4	2	4BB;3BB;	NO
35603	1	17.78	Secondary	Female	1	6.25	9.85	10.26	0.45	45.25	8.5	34.1	2	4BB;4BB;	9W-miscarriage
13927	1	17.97	Secondary	Female	2	6.25	8.47	10.26	0.56	45.12	8.2	28.2	2	4AB;4AA	Ectopic pregnancy
16102	2	19.63	Secondary	Female	2	6.48	7.04	6.5	0.46	68	7.5	30.9	2	3BB;3AB;	NO
19585	1	17.57	Secondary	Both	2	3.9	6.81	11.14	0.58	49.3	9	34.4	2	4BB;3BB;	NO
21046	1	22.43	Secondary	Female	2	6.25	5.47	13.25	0.45	56.12	9.3	34.6	2	4AB;3AB;	NO
21104	2	23.44	Secondary	Both	2	6.28	9.45	10.78	0.48	63.45	8.5	30.5	2	4AA;4AA;	8W-miscarriage
22948	1	20.83	Secondary	Female	2	7.46	6.25	8.95	0.47	26.54	7	31	2	4AB;3AB;	Biochemical pregnancy
23332	8	17.09	Secondary	Male	2	6.24	9	11.2	0.35	66.86	12	29.3	2	4BB;3BA;	NO
29709	5	20.43	Secondary	Both	2	2.61	4.91	10.46	0.69	42.01	7.3	27.6	2	4BB;4BB;	8W-miscarriage 2
28482	5	19.57	Secondary	Unexplained	2	3.45	7.69	8.2	0.55	73.51	8.5	32.2	2	4BB;4BB;	6W-miscarriage 2
27779	3	26.03	Secondary	Female	1	1.74	9.02	13.97	0.65	57.99	8	31.6	2	4BA;4BB;	Ectopic pregnancy
30198	8	22.48	Secondary	Female	2	14.83	8.12	8.58	0.21	46.61	7	34.4	2	4BA;4AB;	8W-miscarriage
28235	2	20.31	Primary	Unexplained	1	5.64	7.68	16.53	0.46	52.72	9.9	32.2	2	5BB;3BA;	NO
37199	1	23.05	Secondary	Both	2	6.13	6.82	10.89	0.39	29.14	10	32.5	2	4BB;4BB;	5W-miscarriage 2
28536	6	21.5	Secondary	Female	2	5.64	9.06	22.44	0.57	44.77	7	30.9	2	4BB;4BB;	Biochemical pregnancy
28670	3	25.39	Secondary	Female	2	6.25	7.48	11.26	0.48	45.74	9	35.6	2	4BB;4AB;	NO
28917	2	18.73	Primary	PCOS（Female）	2	8.5	5.97	10.71	0.76	43.81	9.3	24.9	2	5BB;4BB;	Biochemical pregnancy
29071	3	24.44	Primary	Unexplained	1	5.62	6.2	11.53	0.93	22.25	9.3	28.5	2	4BB;4BB;	NO
29488	4	29.14	Secondary	PCOS（Female）	2	6.44	2.47	9.71	0.67	48.98	11	27.9	2	4BB;3BB;	NO
29571	2	27.06	Secondary	Both	2	11.3	6.38	9.51	0.42	47.7	10	30.3	2	4BB;4BB;	Biochemical pregnancy
33863	9	27.25	Primary	PCOS（Female）	2	14.21	6.98	7.54	0.45	41.83	10	31.6	2	4BB;4BB;	22W-miscarriage 2
29958	1	21.48	Primary	Female	2	5.71	6.82	10.45	0.47	42.16	9	32.7	2	4AB;4BB;	NO
30009	1	21.91	Secondary	Unexplained	2	4.15	6.92	16.6	0.51	59.78	8	32.8	2	4BB;4AB;	NO
27478	1	30.82	Secondary	PCOS（Female）	2	10.25	4.85	11.24	0.47	51.12	7.5	27.4	2	4BB;4BB;	20W-miscarriage 2
30070	3	24.97	Secondary	Female	1	6.25	8.47	11.26	0.85	45.47	8	34.3	2	4BB;4BB;	NO
30172	3	22.03	Primary	Female	2	4.41	5.33	8.27	0.65	50.48	10	34.6	2	4BB;3AB;	Biochemical pregnancy
32926	10	24.44	Primary	Both	2	12.97	5.82	8.44	0.64	48.85	10	27.7	2	4BB;4BB;	8W-miscarriage
30256	2	19.72	Secondary	Both	1	3.9	7.99	9.86	0.61	48.6	8.5	35.1	2	4BA;4BB;	NO
30270	9	29.17	Secondary	Both	2	3.85	5.23	8.26	0.38	46.83	9	30.1	2	4BB;3BB;	NO
30562	4	19.1	Secondary	Female	1	4.91	5.95	12.57	0.79	43.79	9	30.3	2	4BB;4BA;	NO
30570	2	21.19	Primary	PCOS（Female）	1	19.83	4.83	11.25	0.95	52.47	9.3	28	2	4BA;4BB;	NO
33149	5	18.75	Primary	Female	2	3.87	7.65	12.45	0.24	57.17	9	35.7	2	4BB;5BB;	8W-miscarriage
30661	10	26.04	Secondary	Both	2	6.27	5.78	9.47	0.48	34.78	8	29	2	4BA;4BB;	Biochemical pregnancy
35386	4	23.03	Primary	Unexplained	1	6.25	6.47	11.25	0.58	65.25	9	27.2	2	4BB;4BB;	8W-miscarriage
30900	3	24.91	Primary	Both	2	10.77	5.33	7.9	0.94	64.42	10.9	28.4	2	4BB;4BB;	Biochemical pregnancy
31016	7	21.08	Secondary	Both	2	3.98	5.61	13.15	0.75	60.19	8.6	25.8	2	5BB;4BB;	NO
31077	7	23.44	Primary	Both	1	11.59	6.8	8.06	0.75	52.75	8.5	28.1	2	4BB;4BB;	Biochemical pregnancy
35774	1	20.94	Secondary	Female	2	4.41	4.61	8.67	0.42	41.3	9	30.5	2	4BA;4BB;	8W-miscarriage
31357	1	26.04	Secondary	Female	2	3.34	5.89	12.78	0.61	43.19	8	31.7	2	4BB;3AB;	NO
31729	3	20.94	Primary	Both	1	3.78	5.99	9.56	0.5	27.99	9.5	34.1	2	4BB;4AB;	NO
31864	9	21.88	Secondary	Female	2	4.26	9.38	11.83	0.3	35.61	10	29.9	2	4BB;4BA;	Biochemical pregnancy
32100	5	22.21	Primary	Female	2	3.68	7.49	8.31	0.32	35.71	8.4	33.5	2	4BB;3BA;	NO
32210	3	27.89	Primary	PCOS（Female）	2	4.81	7.02	11.45	0.68	24.99	9.5	28.8	2	4BA;4AB;	NO
32228	1	20.2	Secondary	Unexplained	1	3.49	6.66	11.63	0.85	39.07	8	35.3	2	3BA;4BB;	NO
32376	2	17.15	Secondary	Female	2	6.25	7.39	10.96	0.56	59.33	9	32.1	2	4BB;4BB;	Biochemical pregnancy
32395	2	20.45	Secondary	Female	2	5.96	7.52	11.45	0.72	44.95	8	27.2	2	4BB;3BB;	NO
32544	2	23.05	Primary	Unexplained	2	2.27	7.43	7.18	0.27	53.66	9	28.4	2	4BB;4BB;	NO
36856	5	21.48	Primary	Unexplained	1	6.07	8.46	9.77	0.26	31.64	8.3	29.5	2	4BB;4BB;	8W-miscarriage
32727	3	29.32	Primary	PCOS（Female）	2	7.29	5.65	7.42	0.42	40.84	9.1	32	2	4BB;4BA;	Biochemical pregnancy
38831	1	18.13	Secondary	Unexplained	2	3.66	5.82	12.14	0.64	65.01	8.9	31	2	4BA;4BA;	8W-miscarriage
28052	1	19.56	Secondary	PCOS（Female）	2	12.39	8.27	24.28	0.67	42.26	12.1	26.3	2	4BA;4BB;	7W-miscarriage
32694	2	20.28	Primary	Female	1	3.7	4.64	7.12	0.59	48.11	9.3	22.9	2	4BB;4BB;	7W-miscarriage
32983	4	26.67	Secondary	Male	1	5.26	6.21	9.89	1.13	24.51	8.2	33.5	2	4BB;4BB;	7W-miscarriage
33643	1	22.43	Secondary	Both	1	5.7	5.99	8.05	0.21	37.06	9	31.5	2	4BA;4BB;	NO
33678	6	30.08	Secondary	Both	1	5.64	7.16	14.06	0.61	28.31	8	27.6	2	4BB;4BB;	NO
33707	1	20.06	Secondary	Female	1	2.71	6.49	8.51	0.33	58.2	9	30.1	2	4BA;4BB;	NO
33842	2	18.59	Secondary	Female	2	6.25	8.26	11.26	0.45	26.15	8.5	24.4	2	4BB;4BB;	NO
24838	1	21.33	Secondary	Female	2	3.8	5.36	13.85	0.5	21.38	11	28	2	4BB;4BB;	19W-miscarriage 2
33983	1	19.63	Secondary	Female	2	4.4	8.59	12.51	0.7	25.14	9.3	26.2	2	4BB;4BB;	Biochemical pregnancy
34120	2	22.77	Secondary	Female	2	2.47	7.78	12.32	0.79	35.11	9.5	35.7	2	5BB;4BB;	NO
34125	1	29.14	Secondary	PCOS（Female）	2	4.35	4.86	26.42	0.58	35.51	8	30.6	2	4BB;4BB;	7W-miscarriage
34134	4	27.34	Secondary	Female	2	4.11	5.6	10.59	0.23	35.95	13	31.6	2	4BB;4BB;	Biochemical pregnancy
34221	3	18.65	Secondary	Female	2	6.25	8.25	10.25	0.45	52.14	9	22.7	2	4AB;4BB;	NO
34435	3	23.01	Primary	Male	2	10.25	6.25	11.23	0.48	53.26	8.5	26.8	2	4BB;4BB;	NO
34507	7	22.27	Primary	Both	1	4.99	5.26	16.92	0.57	37.81	7	22.8	2	4BB;4AB;	NO
34680	4	21.67	Secondary	Female	2	3.08	6.98	9.45	0.31	55.67	8	23.9	2	4BB;4BB;	NO
34937	2	23.42	Secondary	Female	2	10.77	7.97	9.34	0.21	55.68	10.8	30.6	2	4BB;4BB;	NO
34981	1	20.83	Secondary	Male	1	6.34	5.41	10.56	0.21	61.43	8.5	33.3	2	4AA;4BA;	NO
35212	1	21.67	Primary	EMS（Female）	1	6.25	4.85	11.26	0.48	26.15	9	33	2	4BB;4BB;	NO
35325	5	19.57	Primary	Unexplained	1	3.96	6.52	7.34	0.47	38.3	7	31	2	4BB;3BB;	Biochemical pregnancy
36946	1	24.61	Secondary	Female	1	6.25	8.47	11.26	0.45	21.25	8	31	2	4BB;4BB;	7W-miscarriage
35404	2	25.48	Primary	PCOS（Female）	1	1.13	4.69	10.89	0.58	40.89	8.8	28.4	2	4BB;4BB;	Biochemical pregnancy
35591	6	30.8	Primary	Both	2	12.83	10.96	12.95	0.61	39.26	14	32.3	2	4BA;4BB;	NO
30613	6	23.44	Secondary	Both	2	4.3	6.88	9.23	1.1	20.96	12.4	33.1	2	4AB;4BB;	6W-miscarriage
35652	2	23.42	Primary	PCOS（Female）	1	8.34	2.95	27.82	0.24	48.14	8	27.5	2	5BB;4BB;	Biochemical pregnancy
35687	2	23.12	Primary	Unexplained	1	6.26	8.03	11.59	0.21	29.47	10	32.2	2	4BB;3BB;	NO
37694	10	23.34	Primary	Unexplained	2	5.55	7.26	9.88	0.68	48.79	7	34.2	2	4BB;3BB;	5W-miscarriage
36042	3	20.7	Primary	PCOS（Female）	1	4.12	4.98	11.76	0.21	37.01	8.9	26.5	2	5BB;4BB;	Biochemical pregnancy
36096	3	20.81	Primary	PCOS（Female）	1	4.5	6.8	28.22	0.35	56.25	8.5	28.2	2	4BA;4BB	NO
36284	3	21.41	Primary	Female	1	4.46	5.67	6.37	0.35	76.44	9	28.3	2	4AB;4BB;	NO
36377	3	22.89	Primary	Male	1	3.81	8.46	13.38	0.43	65.04	9	28.3	2	4BB;4BB;	Biochemical pregnancy
36386	2	20.2	Secondary	Both	1	6.29	5.26	11.01	0.48	52.16	8	32.1	2	4BA;4BB;	NO
36540	6	20.03	Primary	Female	2	2.24	8.2	12.95	0.63	35	7	25.5	2	4BB;4BB;	NO
36700	4	24.17	Primary	Both	1	6.85	8	21.44	0.49	49.63	10	23.9	2	4BB;4BB;	NO
36786	3	19.92	Primary	Both	1	3.15	12.8	13.89	0.96	23.41	8.3	35.6	2	4BB;4BB;	NO
38380	4	26.93	Secondary	Unexplained	2	6.26	8.78	11.25	0.49	56.12	9.5	31	2	3BB;4BB;	25W-miscarriage
37080	5	29.3	Secondary	Both	2	4.41	4.79	8.89	0.21	39.09	13	29.7	2	4BB;4BA;	24W-miscarriage
36975	1	18.67	Secondary	Unexplained	1	5.45	12.8	7.92	0.38	29.32	7	35.6	2	4BB;5BB;	NO
30789	10	25.56	Secondary	Both	2	3.19	5.46	9.02	0.6	26.49	9	35.1	2	4AB;4BB;	22W-miscarriage
37089	2	21.48	Secondary	Female	1	4.72	7.19	17.15	0.5	31.38	9	26.4	2	4BB;4BB;	Biochemical pregnancy
37126	3	20.7	Primary	Both	2	6.59	7.48	10.25	0.48	51.45	12	24.4	2	4BB;3AB;	NO
30035	1	24.77	Primary	Both	2	4.77	5.7	26.1	0.91	27.8	10.5	26.8	2	4BB;4BB;	19W-miscarriage 2
37382	6	20.08	Primary	Female	2	8.9	8	7.92	0.37	40.12	9	31.7	2	4BB;3BB;	NO
37430	3	24.03	Primary	Both	2	8.53	7.31	18.56	0.33	36.16	7.5	29.3	2	3BA;4BB;	Biochemical pregnancy
37579	3	33.5	Primary	Both	2	1.52	2.23	12.54	0.33	66.31	9	30.1	2	4BB;4BB;	Biochemical pregnancy
33489	8	23.63	Secondary	Female	1	2.01	5.74	15.62	0.55	36.63	8	34.3	2	4BB;4BB;	15W-miscarriage
37807	2	20.7	Secondary	Both	2	3	10.62	8.28	0.46	63.33	8.4	26.5	2	4BB;4BB;	Biochemical pregnancy
37913	5	22.27	Secondary	Female	1	6.23	5.14	11.23	0.78	45.14	8	31.4	2	4BA;4BB;	NO
37985	1	19.53	Secondary	Female	2	4.63	7.13	29.31	0.6	33.86	8.4	24.7	2	4BB;3BB;	NO
38165	4	20.55	Primary	Female	2	6.25	8.74	10.26	0.48	24.16	9.5	31.9	2	4BB;4BB;	NO
38207	5	23.74	Secondary	PCOS（Female）	2	5.37	5.2	7.5	1.15	29.53	8	25.7	2	4BB;4BB;	NO
31202	1	19.71	Secondary	Female	1	5.21	7.12	9.22	0.85	39.47	8	35.7	2	4BA;4BA;	11W-miscarriage
38519	1	19.63	Secondary	Female	1	5.09	9.1	12.33	0.53	32.03	9.3	31.6	2	4BB;3BB;	NO
38623	3	18.08	Secondary	Both	2	6.26	8.74	11.26	0.56	45.12	8	22.3	2	4BB;4BB;	Biochemical pregnancy
38815	5	18.36	Primary	Unexplained	2	8.32	10.05	5.69	0.51	49.09	8.3	31.2	2	4BB;4BB;	NO
10543	3	17.69	Secondary	Female	2	4.49	4.37	15.2	0.25	61.8	9.6	27.1	2	4AA;4AA;	8W-miscarriage
38859	6	21.72	Primary	Both	2	4.17	5.75	8.51	0.38	38.64	8.5	30.6	2	4BB;4BB;	NO
38932	2	25.71	Secondary	Female	2	6.28	8.47	10.26	0.87	54.17	9	33.2	2	4BB;4BB;	NO
39722	3	18.65	Primary	Both	2	1.16	3.98	9.5	0.92	52.6	11	26.7	2	4AB;4BB;	NO

## Sheet: poor-quality single(E)
ID	Infertility duration	BMI	Infertility type	Cause of infertility	Transplant cycle	LH	FSH	PRL	P	E2	En	Age	the number of transferred blastocysts	blastocyst scoring	pregnancy outcomes	Neonatal birth age	Neonatal birth weight	Neonatal sex ratio	Special case
35450	5	29.97	Primary	PCOS（Female）	1	6.18	9.51	14.6	0.33	31.05	9.2	29.2	1	4CA;	Live birth 1	40.43	4130	Female
42037	3	24.53	Primary	Male	1	1.43	4.26	7.94	0.6	37	9	25.5	1	2CB;	Live birth 1	38.71	4113	Male
33348	6	20.44	Secondary	Female	1	3.52	9.28	8.06	0.21	51.78	8.2	34.9	1	4BC;	Live birth 1	39.14	4100	Male
38214	1	19.72	Secondary	Female	2	4.79	11.84	24.24	0.87	49.17	8	32.7	1	4BC;	Live birth 1	38.43	4000	Male
31374	3	25.34	Primary	Both	1	4.09	2.43	9.02	0.61	28.01	8.5	32.4	1	4BC;	Live birth 1	42.86	4000	Male
28550	2	20.2	Secondary	Unexplained	2	8.85	7.22	8.48	0.57	46.72	8	32	1	4CB;	Live birth 1	40.29	3800	Male
39027	4	25.78	Secondary	Female	2	4.34	5.92	5.22	0.54	65.87	9.8	31.4	1	4CB;	Live birth 1	41.86	3800	Female
40580	4	21.49	Secondary	Female	2	1.64	8.76	13.82	0.41	46.8	8	31.3	1	4BC;	Live birth 1	41.86	3780	Male
31111	2	20.96	Secondary	Female	1	5.4	8.26	15.48	0.84	54.03	9	35	1	4BC;	Live birth 1	40.86	3680	Female	Birth defect
33045	3	18.25	Primary	PCOS（Female）	2	6.57	7.04	10.57	0.47	66.65	7.5	31.3	1	4CB;	Live birth 1	37.29	3600	Male
40236	3	18.25	Primary	Female	1	9.61	8.55	8.39	0.4	31.11	10.8	33.5	1	4CB;	Live birth 1	40.86	3600	Female
31334	2	19.71	Primary	Both	2	3.79	6.87	33.21	0.64	31.93	9.5	23.8	1	4BC;	Live birth 1	39.57	3550	Female
39714	9	21.22	Secondary	Female	1	2.25	7.38	4.93	0.21	42.56	11	21	1	4BC;	Live birth 1	38.14	3513	Female
38083	2	18.14	Primary	Female	2	6.58	8.74	11.25	0.56	47.26	8.2	28.4	1	4BC;	Live birth 1	40.57	3500	Female
30379	5	18.67	Secondary	Female	1	14.76	11.78	13.31	0.44	33.14	10	23	1	4BC;	Live birth 1	41.29	3500	Female
31079	4	18.66	Primary	Female	1	3.75	6.17	10.12	0.33	34.71	10.1	30.5	1	3BC;	Live birth 1	39	3350	Male	GDM
38401	2	18.61	Primary	Female	2	6.29	2.67	11.95	0.36	22.85	9.6	25.9	1	4BC;	Live birth 1	39.57	3340	Female
39153	2	25.81	Primary	PCOS（Female）	1	4.63	7.22	17.66	0.48	58.96	10.6	30.1	1	4CA;	Live birth 1	39.86	3300	Female
40256	6	32.05	Secondary	Male	1	3.41	6.6	14.44	0.58	48.48	10.5	30.4	1	4BC;	Live birth 1	38.14	3250	Female
31850	1	17.97	Secondary	Female	1	4.69	5.33	23.18	0.76	22.83	7.5	29.1	1	4BC;	Live birth 1	40	3250	Female
30483	4	20.81	Secondary	Both	2	4.49	6.55	15.29	0.73	33.25	8.4	30.8	1	4CB;	Live birth 1	39.86	3200	Male
39343	6	28.76	Primary	PCOS（Female）	2	3.8	7.5	13.14	0.3	33.19	9	27.9	1	2CB;	Live birth 1	41	3150	Female
38754	2	19.53	Secondary	Female	1	6.32	5.47	6.47	0.58	41.23	9.5	35	1	4CB;	Live birth 1	37.86	3100	Female
33555	3	19.72	Primary	Both	1	7.41	2.83	20.14	0.49	61.94	8.2	24.8	1	4CB;	Live birth 1	38.86	3000	Female
39680	4	21.91	Primary	Female	1	3.02	4.71	11.54	0.56	46.98	8.2	25.5	1	4BC;	Live birth 1	39.71	3000	Female
34196	7	25.63	Secondary	PCOS（Female）	2	1.84	6.41	5.74	0.48	25.62	8	27.8	1	4CB;	Live birth 1	40	2750	Male
33605	2	28.13	Secondary	Female	2	2.57	6.51	6.01	0.45	26.1	9	29.3	1	4BC;	Live birth 1	39.57	2650	Male
33178	1	18.67	Secondary	Female	1	4.29	6.92	23.25	0.26	35.81	7.5	30.4	1	4BC;	Live birth 1	40.14	2600	Female
36644	2	16.02	Secondary	EMS（Female）	1	5.87	7.5	9.86	0.55	52.74	7	33	1	4BC;	Live birth 1	37.43	2200	Female
32809	5	19.57	Primary	Unexplained	1	1.07	5.87	13.02	0.53	54.34	8.8	31.6	1	4CA;	Live birth 1	31.14	1600	Female	Preterm birth
37266	9	28.62	Primary	Female	2	5.38	7.5	10.55	0.54	54.13	9	30.3	1	4CB;	Live birth 1	29	1200	Female	Preterm birth
36578	1	28.04	Primary	Male	1	5.29	8.64	19.4	0.54	42.16	11	31.5	1	4BC;	Live birth 1	28.14	1030	Male	Preterm birth
31886	1	21.45	Secondary	Female	2	4.46	7.79	13.24	0.61	83.92	11	32	1	4CB;	No
37669	8	19.72	Secondary	Unexplained	2	4.41	7.29	8.71	0.31	73.24	7.5	33.9	1	4BC;	Biochemical pregnancy
30754	1	18.65	Secondary	EMS（Female）	2	2.94	8.29	10.29	0.85	70.96	7	35	1	4BC;	No
33303	3	19.29	Primary	Both	1	3.54	6.53	9.18	0.31	69.67	7.5	25	1	2BC;	No
40914	5	23.61	Primary	Female	2	3.7	8.25	10.77	0.91	68.9	11.1	33	1	4BC;	Biochemical pregnancy
40781	1	22.27	Secondary	Both	2	4.66	4.99	11.22	0.52	67.4	7.5	30.5	1	4CA;	No
42704	3	20.58	Secondary	Unexplained	1	3.5	8.78	13.5	0.35	66.7	8	33.8	1	4CB;	Biochemical pregnancy
42263	2	23.23	Secondary	Female	1	4.66	9.35	16.02	0.75	65.3	11.1	28.6	1	4CB;	No
38657	1	27.39	Secondary	PCOS（Female）	2	9.26	4.82	9.56	0.47	62.14	9	30.7	1	4CB;	Biochemical pregnancy
28465	1	15.63	Secondary	Female	2	2.98	7.32	11.23	0.57	61.2	7	25.9	1	4BC;	No
36697	2	18.82	Primary	Unexplained	1	4.8	5.54	11.32	0.57	60.96	7.5	31.3	1	4BC;	Biochemical pregnancy
37722	5	19.48	Primary	Unexplained	1	3.74	7.47	11.81	0.72	60.16	7	32.7	1	4BC;	No
29842	3	16.16	Primary	Both	2	7.03	6.84	17.55	0.61	59.58	9	28.2	1	4BC;	No
35160	1	22.48	Secondary	Female	1	3.84	7.18	14.86	0.27	59.53	8.1	27.5	1	4BC;	12W-miscarriage
40156	3	23.88	Primary	Both	1	2.93	9.39	8.94	0.63	59.3	9.2	25.1	1	4CB;	No
41073	3	18.73	Primary	Female	1	2.78	6.96	12.26	0.34	59	11.5	28	1	4BC;	No
30529	2	22.03	Secondary	Both	2	1.88	5.14	10.06	0.74	57.92	8.9	32.9	1	5AC;	No
35913	5	26.06	Primary	PCOS（Female）	1	4.36	5.78	6.33	0.79	56.5	9	27.3	1	2BC;	No
32208	2	19.81	Secondary	Female	1	5.1	3.22	6.45	0.43	56.18	9.6	25	1	4CB;	No
40684	3	18.67	Secondary	Female	2	6.25	4.87	10.25	0.45	56.14	8.5	29.5	1	4BC;	No
38427	9	29.3	Primary	Both	1	8.86	6.26	4.67	0.21	54.98	7	27.5	1	4BC;	23W-miscarriage
30632	1	21.23	Primary	Female	2	6.25	8.47	11.23	0.45	54.14	9	29.4	1	4BC;	29W-miscarriage				gestational hypertension
34711	7	18.83	Secondary	Unexplained	1	5.64	5.01	12.83	0.38	54	9	35	1	4CB;	Biochemical pregnancy
32578	1	20.66	Secondary	PCOS（Female）	1	17.79	8.17	14.31	0.47	52.02	7	29.1	1	4CB;	No
33528	3	19.29	Primary	Both	1	5.71	8.58	14.82	0.87	51.51	9	30.5	1	4CB;	No
41638	1	23.88	Secondary	Male	1	3.65	7.15	10.28	0.47	51.48	7	33.7	1	4BC;	Biochemical pregnancy
23685	1	22.32	Secondary	Both	2	4.34	9.88	9.2	0.23	51.19	12	29.1	1	4AC;	6W-miscarriage
38893	2	24.84	Primary	Male	1	1.08	4.36	11.62	0.9	50.84	9	27.8	1	4BC;	No
31932	6	25.46	Secondary	Both	2	8.99	8.32	4.74	0.26	49.94	9.5	24.5	1	4BC;	No
31789	5	18.82	Primary	Female	1	4.84	6.14	14.97	0.3	49.74	8.2	28.5	1	4CA;	No
37908	9	23.34	Secondary	Female	2	2.93	6.43	7.07	0.41	49.53	11	34.7	1	4CB;	No
12774	4	19.15	Secondary	Female	2	2.8	3.95	21.8	0.36	49.46	8.5	30.8	1	4BC;	23W-miscarriage				2-1（tire reduction)
32202	3	20.31	Secondary	Female	2	4.1	6.59	8.06	0.46	49.28	10.4	34.6	1	4CB;	No
40946	3	21.19	Secondary	Female	2	3.22	8	13.69	0.81	48.8	8	30.8	1	4BC;	8W-miscarriage
38958	4	20.45	Secondary	EMS（Female）	1	5.53	9.97	6.21	0.52	47.23	13	31.8	1	4CB;	Biochemical pregnancy
37327	4	28.72	Primary	Both	2	2.24	8.24	11.31	0.36	46.93	10	35	1	4CA;	No
39761	1	21.31	Primary	Female	2	3.28	7.86	21.71	0.41	46.7	9	34.2	1	4BC;	Biochemical pregnancy
42079	3	25.78	Primary	Both	1	9.13	7.44	6.87	0.23	46.7	11	24	1	2BC;	No
24740	6	20.03	Secondary	Female	2	4.82	11.75	19.08	0.21	46.02	8.5	33.8	1	4BC;	No
33815	3	21.45	Secondary	Female	1	5.33	8.69	8.74	0.47	45.9	9	29.2	1	5BC;	8W-miscarriage
38892	1	17.8	Secondary	Both	2	5.85	8.27	7.49	0.43	45.63	8	34.6	1	4CB;	No
34705	4	30.12	Primary	PCOS（Female）	1	1.66	4.87	13.54	0.28	45.63	8	29.4	1	4CB;	No
41251	5	25.22	Secondary	Female	1	4.89	6.6	12.25	0.27	45.2	8.5	29.4	1	2CC;	No
37155	5	19.07	Primary	Unexplained	1	1.82	5.64	6.71	0.55	44.19	8.5	24.5	1	4CB;	No
32206	3	20.58	Primary	Both	2	2.8	9.36	15.92	0.71	44.04	9.5	35	1	4BC;	No
35731	3	22.22	Secondary	Female	1	4.95	7.95	11.45	0.32	43.58	10	34.9	1	4CB;	No
41217	7	23.07	Secondary	Female	1	1.47	9.09	19.53	0.72	43	7	32.2	1	4BC;	No
41134	4	19.13	Secondary	Unexplained	1	2.92	9.5	9.35	0.57	40.1	9	31.6	1	4BC;	No
38886	1	20.81	Secondary	Male	2	3.36	7.24	11.6	0.5	39.61	8.5	32.4	1	4BC;	Biochemical pregnancy
31806	3	23.3	Primary	Female	2	10.84	6.38	7.08	0.43	39.53	8.5	31.4	1	4CB;	Biochemical pregnancy
36094	4	23.44	Secondary	Unexplained	2	11.08	9.24	10.13	0.36	39.28	9	31.9	1	4BC;	No
19946	6	29.71	Secondary	PCOS（Female）	2	1.67	8.18	7.73	0.3	39.27	8	33.6	1	4BC;	No
36881	1	19.53	Secondary	Female	1	5.17	8.63	8.4	0.5	36.73	8.7	20	1	4CB;	Biochemical pregnancy
33765	4	24.22	Secondary	Both	1	10.26	3.58	10.25	0.58	36.25	8.2	31.2	1	4BC;	8W-miscarriage
33930	2	17.11	Secondary	Female	2	4.69	6.21	8.5	0.53	35.94	8	34.7	1	4CB;	Biochemical pregnancy
40658	4	22.48	Secondary	Female	1	2.23	4.44	13.63	0.6	35.86	8	34.2	1	4BC;	No
16153	9	21.48	Primary	PCOS（Female）	1	16.48	7.95	10.44	0.26	35.69	8	32.6	1	4BC;	No
40570	3	16.23	Primary	Unexplained	1	3.87	7.54	9.75	0.42	35.1	11	27.3	1	4CB;	Biochemical pregnancy
31092	1	20.31	Primary	Female	2	5.31	7.9	16.29	0.41	34.97	10.7	34.2	1	6CB;	Biochemical pregnancy
38704	2	23.05	Primary	Both	1	11.4	7.58	6.32	0.48	34.93	9	31	1	4BC;	20W-miscarriage
36581	8	19.56	Secondary	EMS（Female）	2	4.88	14.6	18.54	0.54	34.49	9	34.5	1	4BC;	No
31652	5	21.97	Primary	EMS（Female）	1	2.39	7.16	8.89	0.75	34.08	9.4	29.3	1	4BC;	No
30148	1	24.35	Primary	Unexplained	1	4.55	7.08	19.78	0.3	34.04	8	35	1	4BC;	No
37030	2	19.81	Primary	Female	1	9.93	9.57	9.6	0.51	33.53	9	30	1	4CA;	Biochemical pregnancy
36829	2	23.23	Primary	PCOS（Female）	1	5.23	4.8	15.37	0.6	33.14	10.7	30	1	4CB;	No
32718	4	18.97	Primary	EMS（Female）	2	2.5	6.23	12.66	0.64	32.35	8	30.7	1	4CC;	No
37815	1	21.75	Primary	Unexplained	1	2.67	8.04	12	0.54	32.23	10.1	27.7	1	4CB;	No
35642	1	22.06	Secondary	Female	1	3.09	9.2	10.25	0.25	32.02	8	28.6	1	4BC;	No
40192	7	21.36	Primary	Unexplained	2	4.3	4.96	8.63	1.14	31.6	7	32.8	1	4CB;	Biochemical pregnancy
33695	3	24.22	Secondary	Both	1	3.03	6.88	14.01	0.22	30.76	8.2	29.2	1	4BC;	No
31167	5	25.34	Secondary	Male	2	1.14	5.21	11.64	0.88	30.49	8	26	1	4CC;	No
28969	3	26.29	Secondary	PCOS（Female）	2	3.61	5.65	18.9	0.59	29.73	13.3	27.8	1	4BC;	9W-miscarriage
31889	2	24.17	Secondary	Female	2	4.88	6.33	15.07	0.45	28.19	8.5	28.9	1	4AC;	15W-miscarriage
38109	3	20.03	Secondary	Male	2	7.64	7.1	8.45	0.48	27.44	7.2	30.4	1	2BC;	No
38904	3	27.68	Secondary	Both	2	9.25	5.15	6.25	0.45	26.25	9	27.8	1	4CB;	Biochemical pregnancy
36530	2	19.82	Secondary	Female	2	6.23	5.48	8.47	0.54	26.17	9	30.8	1	4CB;	No
38236	5	23.07	Primary	Unexplained	1	4.06	4.45	9.78	0.42	26.01	9	31.4	1	4BC;	No
33840	3	19.23	Secondary	Both	2	6.58	4.74	10.23	0.45	25.16	11.6	30.9	1	4BC;	No
36429	1	25.97	Secondary	Male	2	6.25	9.85	9.56	0.45	25.16	10	25.1	1	4BC;	10W-miscarriage
33197	6	25.3	Primary	Both	2	10.25	6.25	25.15	0.48	25.12	12	28.3	1	4BC;	No
24863	3	20.72	Secondary	Both	2	6.36	3.5	7.75	0.65	24.38	7.8	34	1	4BC;	No
31667	2	22.06	Secondary	Female	1	18.5	12.65	10.17	0.85	23.01	13	30.9	1	4BC;	Biochemical pregnancy
33160	5	23.63	Primary	Both	1	4.26	7.15	12.93	0.63	22.8	13	21.7	1	3CC;	Biochemical pregnancy
37784	2	21.35	Secondary	Female	2	1.92	1.45	7.25	0.33	22.26	7.8	33.2	1	4CB;	No
35648	8	23.73	Secondary	Both	2	4.29	5.49	17.04	0.45	32.51	9	31.4	1	4BC;	No
37139	2	20.2	Secondary	Female	2	5.76	13.38	8.1	0.47	38.54	9	28.3	1	4BC;	No
31236	3	20.31	Primary	PCOS（Female）	1	6.98	2	15.53	1.13	26.25	9.2	27	1	4CA;	10W-miscarriage
37055	3	20.31	Secondary	Female	2	1.57	9.23	9.28	0.55	31.58	7.7	26.2	1	4CB;	No

## Sheet: logistic-live birth
ID	Infertility duration(years)	BMI	Infertility type	Transplant cycle	Transplant number	high-quality blastocysts	transplantable double blastocyst	PCOS	EMS	EN	Age	pregnancy outcome
33422	2	22.58	Secondary	1	1	YES	No	No	No	8.8	32.3	Live birth
37193	4	19.98	Primary	1	1	YES	No	No	No	8	30.4	Live birth
29504	8	17.53	Secondary	1	1	YES	No	No	No	8.9	32.4	Live birth
33861	4	26.64	Secondary	1	1	YES	No	No	No	8.3	29.7	Live birth
39357	4	23.92	Primary	1	1	YES	No	No	No	11	30.1	Live birth
33533	1	20.96	Secondary	1	1	YES	No	No	No	7.8	34.2	Live birth
36541	3	25.53	Secondary	1	1	YES	No	No	No	7	22.3	Live birth
36137	3	18.22	Primary	1	1	YES	No	Yes	No	8.3	27.3	Live birth
37678	1	27.89	Secondary	1	1	YES	No	No	No	13	28.2	Live birth
38004	2	19.98	Primary	1	1	YES	No	No	No	9	28.3	Live birth
31883	5	20.44	Primary	1	1	YES	No	Yes	No	9	31.3	Live birth
36856	5	21.48	Secondary	2	1	YES	No	No	No	9	29.8	Live birth
33073	3	22.21	Primary	1	1	YES	No	Yes	No	11	28.3	Live birth
32540	3	20.13	Secondary	1	1	YES	No	No	No	10.8	34.2	Live birth
28277	1	21.16	Secondary	2	1	YES	No	No	No	9	27.1	Live birth
34079	1	21.48	Secondary	1	1	YES	No	No	No	8.4	30.6	Live birth
32194	2	26.04	Primary	1	1	YES	No	Yes	No	9.7	30.4	Live birth
31109	2	16.41	Primary	2	1	YES	No	No	No	16	27	Live birth
28530	6	28.13	Primary	2	1	YES	No	Yes	No	8	31.6	Live birth
35691	2	21.99	Primary	1	1	YES	No	Yes	No	9.2	32.3	Live birth
32427	4	21.08	Primary	1	1	YES	No	Yes	No	10	28.5	Live birth
35347	4	20.2	Primary	1	1	YES	No	No	No	8	31	Live birth
37425	3	26.29	Primary	1	1	YES	No	No	No	9.6	27.4	Live birth
29858	1	14.87	Secondary	1	1	YES	No	No	No	8	22.6	Live birth
38033	2	23.71	Secondary	2	1	YES	No	No	No	8.2	30.1	Live birth
31047	2	22.89	Secondary	1	1	YES	No	No	No	8.8	34.5	Live birth
39439	4	18.55	Secondary	1	1	YES	No	No	No	9	33.2	Live birth
38205	1	17.01	Secondary	1	1	YES	No	No	No	11	33.4	Live birth
38630	2	18.43	Secondary	1	1	YES	No	No	No	9	36	Live birth
35735	5	20.8	Primary	1	1	YES	No	No	No	7	29.2	Live birth
33924	1	23.83	Secondary	1	1	YES	No	No	No	9	32.7	Live birth
32118	5	32.01	Secondary	1	1	YES	No	No	No	9.5	27.2	Live birth
32506	1	29.14	Primary	1	1	YES	No	Yes	No	9.4	25.1	Live birth
13088	4	19.81	Secondary	2	1	YES	No	No	No	9	34.1	Live birth
30448	5	19.56	Secondary	1	1	YES	No	No	No	10.2	30.1	Live birth
39010	3	22.6	Primary	1	1	YES	No	No	No	8.5	28.5	Live birth
27523	5	27.77	Primary	2	1	YES	No	No	No	10	30.2	Live birth
31286	1	20.03	Primary	1	1	YES	No	No	No	9.8	24.4	Live birth
32020	5	25.1	Primary	1	1	YES	No	No	No	9.2	28.8	Live birth
32248	3	22.43	Primary	1	1	YES	No	Yes	No	11	26.9	Live birth
19548	3	20.69	Secondary	2	1	YES	No	No	No	10.1	31.1	Live birth
29960	3	26.56	Secondary	2	1	YES	No	Yes	No	8.5	31.8	Live birth
33028	2	26.91	Primary	1	1	YES	No	No	No	8	27.2	Live birth
33080	1	26.04	Secondary	1	1	YES	No	No	No	9.2	29.1	Live birth
29262	6	25.28	Primary	2	1	YES	No	Yes	No	8.8	31.7	Live birth
21573	1	17.48	Secondary	2	1	YES	No	No	Yes	10.5	35.1	Live birth
32322	4	24.84	Secondary	2	1	YES	No	No	No	9	29.7	Live birth
28283	3	19.43	Primary	2	1	YES	No	No	Yes	10.5	29	Live birth
28167	5	20.81	Primary	1	1	YES	No	Yes	No	11.3	28.1	Live birth
31147	9	24.65	Secondary	2	1	YES	No	Yes	No	9	34.8	Live birth
37181	2	17.15	Primary	1	1	YES	No	No	No	8.5	34.5	Live birth
32254	3	27.18	Primary	2	1	YES	No	No	No	9.4	34.6	Live birth
37928	2	22.89	Primary	1	1	YES	No	No	No	8	28.7	Live birth
27178	3	21.79	Secondary	2	1	YES	No	No	No	11	31.4	Live birth
31639	5	21.88	Primary	1	1	YES	No	Yes	No	8.2	25.9	Live birth
30891	7	21.48	Secondary	2	1	YES	No	No	No	12	34.8	Live birth
33678	6	30.08	Secondary	2	1	YES	No	No	No	8.5	27.8	Live birth
29444	1	28.91	Secondary	1	1	YES	No	Yes	No	8.5	33.6	Live birth
37728	4	18.78	Secondary	1	1	YES	No	Yes	No	7	34.4	Live birth
30560	2	26.04	Secondary	1	1	YES	No	No	No	8	35.2	Live birth
34530	2	17.71	Primary	1	1	YES	No	No	No	8	30.7	Live birth
31938	5	19.53	Secondary	2	1	YES	No	No	No	7	29.6	Live birth
33434	1	20.94	Secondary	1	1	YES	No	No	No	7.6	28.8	Live birth
37570	3	21.33	Secondary	1	1	YES	No	No	No	9	28.3	Live birth
32365	1	18.67	Secondary	1	1	YES	No	No	No	7.1	30.5	Live birth
30273	2	19.71	Primary	1	1	YES	No	No	Yes	10	29.8	Live birth
31273	3	20.08	Secondary	1	1	YES	No	No	No	10.1	32.7	Live birth
30991	1	18.43	Secondary	1	1	YES	No	No	No	9.5	31.9	Live birth
30688	3	19.88	Primary	1	1	YES	No	No	No	9.3	32.3	Live birth
33344	2	21.64	Primary	1	1	YES	No	No	No	8.3	28.6	Live birth
36124	3	18.26	Primary	2	1	YES	No	No	No	9	28.5	Live birth
32237	2	19.43	Primary	1	1	YES	No	No	No	8.5	29	Live birth
31182	7	17.19	Primary	1	1	YES	No	No	No	8.4	31.3	Live birth
22732	1	21.37	Secondary	2	1	YES	No	No	No	10	29.8	Live birth
31917	3	22.31	Secondary	2	1	YES	No	No	No	8.5	33.8	Live birth
34228	3	18.36	Primary	1	1	YES	No	Yes	No	11	28.1	Live birth
31884	2	20.31	Primary	2	1	YES	No	No	No	9.6	24.2	Live birth
37147	1	19.98	Secondary	1	1	YES	No	No	No	8	35.2	Live birth
37601	2	18.65	Primary	1	1	YES	No	No	No	8.3	28.4	Live birth
32833	1	24.44	Secondary	1	1	YES	No	No	No	9	35.9	Live birth
30406	1	28.76	Secondary	1	1	YES	No	No	No	9	33.9	Live birth
32531	2	16.02	Secondary	1	1	YES	No	No	No	8.5	30.4	Live birth
25750	3	18.9	Secondary	2	1	YES	No	No	No	9.1	35.5	Live birth
38765	3	17.78	Primary	1	1	YES	No	No	No	7.8	21	Live birth
34846	1	21.33	Primary	1	1	YES	No	No	Yes	13.3	27.4	Live birth
32129	3	21.91	Secondary	2	1	YES	No	No	No	8	31.5	Live birth
35795	2	20.2	Secondary	1	1	YES	No	No	No	9.6	29.7	Live birth
31132	1	19.14	Secondary	1	1	YES	No	No	No	12	34.9	Live birth
37292	3	20.03	Secondary	1	1	YES	No	No	No	7.6	31.9	Live birth
38102	8	21.23	Primary	1	1	YES	No	No	No	8	35.9	Live birth
20477	1	23.44	Secondary	2	1	YES	No	No	No	8	27.4	Live birth
29376	1	20.9	Secondary	1	1	YES	No	No	No	9	35.7	Live birth
31926	5	20.5	Primary	2	1	YES	No	No	No	11	24.9	Live birth
35909	1	19.43	Secondary	1	1	YES	No	No	No	10	28.2	Live birth
21084	4	26.67	Secondary	2	1	YES	No	No	No	9.4	33.3	Live birth
32836	1	24.34	Secondary	1	1	YES	No	Yes	No	10	34.8	Live birth
35081	2	18.29	Primary	2	1	YES	No	Yes	No	10	30.8	Live birth
33499	8	22.48	Primary	1	1	YES	No	No	No	10	32.9	Live birth
32571	1	18.59	Secondary	1	1	YES	No	No	No	8	34.2	Live birth
30274	4	21.78	Primary	1	1	YES	No	No	No	12	28.5	Live birth
32842	5	20.03	Secondary	1	1	YES	No	No	No	11	30.4	Live birth
29734	2	23.81	Primary	1	1	YES	No	No	No	9	27.2	Live birth
33916	2	21.48	Secondary	2	1	YES	No	No	No	9	35	Live birth
35168	3	25.64	Primary	1	1	YES	No	No	No	9.7	31.2	Live birth
30366	5	25.2	Secondary	1	1	YES	No	No	No	9.3	34.5	Live birth
31343	5	22.89	Primary	1	1	YES	No	Yes	No	8.7	27.1	Live birth
36928	2	28.89	Secondary	1	1	YES	No	No	No	11	28.6	Live birth
37892	4	19.23	Secondary	1	1	YES	No	No	No	11	32	Live birth
30981	1	21.48	Primary	1	1	YES	No	Yes	No	10	30.7	Live birth
33469	6	28.44	Primary	1	1	YES	No	No	No	10	27.8	Live birth
32030	6	24.8	Primary	1	1	YES	No	No	No	14.9	30.3	Live birth
30166	3	17.06	Secondary	1	1	YES	No	No	No	8	31.9	Live birth
27259	6	18.29	Primary	2	1	YES	No	No	No	10	28.9	Live birth
33416	5	28.84	Primary	1	1	YES	No	No	No	8.5	28.9	Live birth
32634	3	18.37	Primary	1	1	YES	No	Yes	No	8	28	Live birth
35511	5	18.67	Primary	1	1	YES	No	No	No	9	30.6	Live birth
36158	2	30.08	Primary	1	1	YES	No	Yes	No	7.8	30.3	Live birth
29635	2	21.09	Primary	1	1	YES	No	Yes	No	7.7	30.9	Live birth
31061	1	18.83	Secondary	1	1	YES	No	No	No	8	29.3	Live birth
25768	1	22.04	Secondary	2	1	YES	No	No	No	9	34.5	Live birth
29996	1	23.01	Secondary	2	1	YES	No	No	No	9	30	Live birth
33632	1	21.56	Primary	1	1	YES	No	No	No	7.5	27.5	Live birth
31896	2	20.57	Secondary	1	1	YES	No	No	No	7.8	32.9	Live birth
33308	3	20.28	Primary	1	1	YES	No	No	No	12	26.8	Live birth
30056	1	17.97	Secondary	1	1	YES	No	No	No	9	30.2	Live birth
36334	2	22.27	Secondary	2	1	YES	No	No	No	11	30.7	Live birth
29983	2	19.05	Secondary	1	1	YES	No	No	No	10	25	Live birth
36238	2	20.2	Primary	1	1	YES	No	No	No	7.8	25.6	Live birth
35720	1	17.15	Primary	1	1	YES	No	No	No	9	25.7	Live birth
35675	3	23.94	Primary	1	1	YES	No	Yes	No	7.3	30.7	Live birth
25857	2	17.48	Secondary	1	1	YES	No	No	No	9.7	34.5	No live birth
33616	4	19.33	Secondary	1	1	YES	No	No	No	9	31.5	Live birth
31299	2	21.88	Primary	1	1	YES	No	No	No	10.8	30	Live birth
32272	2	25.39	Secondary	1	1	YES	No	No	No	8	23.1	Live birth
32035	2	18.67	Secondary	1	1	YES	No	No	No	9.1	29.8	Live birth
19558	2	21.21	Secondary	2	1	YES	No	Yes	No	8	27.3	Live birth
19459	3	22.04	Secondary	2	1	YES	No	No	No	9	30	Live birth
34624	2	21.8	Primary	2	1	YES	No	No	No	10.3	31.1	Live birth
35142	2	20.4	Secondary	1	1	YES	No	No	No	10.4	29.9	Live birth
36061	2	22.04	Primary	2	1	YES	No	Yes	No	10	26.4	Live birth
29181	2	18.83	Primary	1	1	YES	No	No	No	9	32.6	Live birth
30420	2	20.17	Primary	1	1	YES	No	No	No	9	27.7	Live birth
36056	1	19.95	Secondary	1	1	YES	No	No	No	9	30.2	Live birth
31500	2	19.72	Primary	1	1	YES	No	No	No	9	29.6	Live birth
36883	5	19.11	Primary	1	1	YES	No	No	No	9	30	Live birth
38073	1	18.83	Secondary	2	1	YES	No	No	No	11	30.7	Live birth
36217	4	20.7	Primary	1	1	YES	No	No	No	8.5	31.3	Live birth
31295	5	19.15	Primary	1	1	YES	No	No	No	8.7	23.8	Live birth
20396	3	21.97	Secondary	2	1	YES	No	No	No	8.5	30.6	Live birth
35026	3	18.36	Primary	1	1	YES	No	Yes	No	8.4	32.1	Live birth
33463	3	20.55	Primary	1	1	YES	No	No	No	7	34.4	Live birth
27476	3	17.71	Secondary	2	1	YES	No	No	No	8.7	34.6	Live birth
30583	1	17.69	Secondary	1	1	YES	No	No	No	9	34.1	Live birth
36219	1	18.87	Secondary	1	1	YES	No	No	No	9	24.7	Live birth
32904	2	16	Secondary	1	1	YES	No	No	No	7.3	25.2	Live birth
35877	5	23.88	Secondary	1	1	YES	No	No	No	8.5	35	Live birth
35911	2	26.37	Secondary	2	1	YES	No	No	No	9.1	35.7	Live birth
19853	3	19.14	Secondary	2	1	YES	No	Yes	No	10	29.7	Live birth
30286	1	20.62	Secondary	1	1	YES	No	No	No	11	30.3	Live birth
32094	1	22.15	Secondary	1	1	YES	No	No	No	7.9	33.2	Live birth
31937	4	30.85	Secondary	1	1	YES	No	Yes	No	11.4	28.8	Live birth
39850	1	22.64	Secondary	1	1	YES	No	No	No	9	25.4	Live birth
32737	3	19.2	Primary	1	1	YES	No	Yes	No	10.4	26.3	Live birth
35935	4	20.7	Primary	1	1	YES	No	No	No	9.2	32.8	Live birth
38478	4	25.34	Primary	1	1	YES	No	No	No	7.9	28.9	Live birth
31231	9	17.31	Primary	1	1	YES	No	No	No	10.7	30	Live birth
31158	5	20.08	Secondary	1	1	YES	No	No	No	10.9	28.8	Live birth
37836	3	23.23	Secondary	1	1	YES	No	Yes	No	8	33.1	Live birth
32618	1	20.03	Primary	1	1	YES	No	Yes	No	8.6	30.8	Live birth
33532	1	18.75	Secondary	1	1	YES	No	No	No	9	30.5	Live birth
38278	3	21.41	Secondary	2	1	YES	No	No	No	9.5	27.9	Live birth
26902	1	24.03	Secondary	2	1	YES	No	No	No	9	27.8	Live birth
34798	3	23.51	Primary	1	1	YES	No	Yes	No	10	25.1	Live birth
30784	3	22.03	Secondary	1	1	YES	No	No	No	7	30	Live birth
32333	1	18.18	Primary	1	1	YES	No	No	No	8.3	27.4	Live birth
37103	4	16.18	Primary	1	1	YES	No	No	No	8	29.4	Live birth
28621	2	17.04	Primary	2	1	YES	No	No	No	8	33.6	Live birth
32147	2	19.2	Secondary	2	1	YES	No	No	No	10	30.1	Live birth
30696	5	20.28	Secondary	1	1	YES	No	No	No	8.3	30.7	Live birth
34108	6	19.92	Primary	1	1	YES	No	No	No	7.5	34.1	Live birth
30541	2	20.96	Primary	1	1	YES	No	No	No	9.6	28.7	Live birth
38899	3	17.26	Primary	1	1	YES	No	No	No	8.5	28.9	Live birth
31616	1	24.97	Secondary	1	1	YES	No	No	No	9	34	Live birth
35110	2	20.2	Primary	1	1	YES	No	Yes	No	11.9	26.6	Live birth
33321	2	16.82	Secondary	1	1	YES	No	No	No	8	30.2	Live birth
30995	3	17.53	Secondary	1	1	YES	No	No	No	9	27.3	Live birth
35918	3	17.4	Primary	1	1	YES	No	No	No	11	31.2	Live birth
32007	1	20.94	Secondary	2	1	YES	No	No	No	7.6	24.1	Live birth
33130	3	22.58	Primary	1	1	YES	No	Yes	No	10	26.7	Live birth
36655	4	23.44	Secondary	1	1	YES	No	No	No	9	29.4	Live birth
28571	2	18.82	Secondary	2	1	YES	No	Yes	No	8.5	32.2	Live birth
31649	1	22.86	Primary	2	1	YES	No	No	No	9	26.5	Live birth
37481	2	20.03	Primary	2	1	YES	No	No	No	10	25.1	Live birth
32438	7	27.56	Primary	1	1	YES	No	No	No	10.6	25.2	Live birth
31479	1	20.32	Secondary	1	1	YES	No	No	No	9	32.7	Live birth
29944	3	19.96	Primary	1	1	YES	No	No	No	10.5	31.2	Live birth
29884	2	24.61	Primary	2	1	YES	No	No	No	9.6	29.7	Live birth
38222	1	16.94	Secondary	1	1	YES	No	No	No	7.5	29.8	Live birth
35992	5	21.05	Primary	1	1	YES	No	Yes	No	8.6	30.1	Live birth
27699	4	20.7	Primary	1	1	YES	No	No	No	7.3	34.4	Live birth
28457	2	17.15	Primary	2	1	YES	No	No	No	9	23.6	Live birth
29678	1	20.94	Secondary	2	1	YES	No	No	No	10	29.3	Live birth
38038	5	27.55	Primary	2	1	YES	No	No	No	11	28.4	Live birth
33281	1	22.89	Secondary	1	1	YES	No	No	No	7.5	31.5	Live birth
29523	3	26.3	Primary	1	1	YES	No	Yes	No	11	27	Live birth
36160	1	22.04	Secondary	2	1	YES	No	No	No	9	31.5	Live birth
37850	1	20.32	Primary	1	1	YES	No	No	No	9	29	Live birth
35728	1	24.16	Primary	1	1	YES	No	No	No	9.7	32.7	Live birth
29471	1	21.88	Primary	2	1	YES	No	No	No	8.3	31.5	Live birth
29758	1	21.5	Secondary	2	1	YES	No	No	No	7	28.1	Live birth
32850	5	18.59	Secondary	1	1	YES	No	No	No	7.8	23.7	Live birth
35884	1	18.36	Secondary	1	1	YES	No	No	No	10.4	30	Live birth
30282	1	22.89	Secondary	1	1	YES	No	No	No	8.2	25.9	Live birth
31436	3	24.8	Primary	1	1	YES	No	No	No	9	31.6	Live birth
30740	1	18.07	Secondary	1	1	YES	No	No	No	9	26.6	Live birth
29433	6	16.85	Secondary	2	1	YES	No	No	No	8.5	31.8	Live birth
35178	2	19.83	Primary	1	1	YES	No	No	No	13	26.8	Live birth
33465	1	21.45	Secondary	1	1	YES	No	No	No	9.2	25.3	Live birth
31973	1	21.41	Secondary	1	1	YES	No	No	No	7.5	27.7	Live birth
28304	3	20.03	Primary	1	1	YES	No	No	No	10	32.5	Live birth
39638	7	18.31	Secondary	1	1	YES	No	No	Yes	8.5	29.2	Live birth
38674	3	21.45	Primary	2	1	YES	No	No	No	10	27.4	Live birth
33260	5	23.44	Primary	1	1	YES	No	No	No	9.8	32.3	Live birth
31191	14	21.45	Primary	1	1	YES	No	No	No	10.4	30.2	Live birth
38466	3	20.81	Primary	1	1	YES	No	No	No	10	30.8	Live birth
36266	12	20.7	Secondary	1	1	YES	No	No	No	11.3	32.7	Live birth
30831	1	26.35	Secondary	1	1	YES	No	No	No	11	34.9	Live birth
38181	4	20.03	Primary	1	1	YES	No	Yes	No	7.5	31.6	Live birth
32519	1	18.37	Primary	1	1	YES	No	Yes	No	11.2	30.5	Live birth
29780	4	20.57	Secondary	1	1	YES	No	No	No	9.5	27.1	Live birth
30206	1	20.28	Primary	1	1	YES	No	No	Yes	10	24.7	Live birth
33009	3	17.63	Primary	1	1	YES	No	No	No	7	27.1	Live birth
32317	3	26.49	Primary	1	1	YES	No	Yes	No	8.5	30.1	Live birth
33254	5	22.04	Secondary	1	1	YES	No	No	No	11	30.7	Live birth
29001	3	18.43	Primary	1	1	YES	No	No	No	11.2	33.5	Live birth
30910	2	21.51	Primary	1	1	YES	No	No	No	12	35.7	Live birth
33092	7	17.71	Primary	1	1	YES	No	Yes	No	10.8	30.8	Live birth
30111	7	23.59	Primary	1	1	YES	No	No	No	10	22.2	Live birth
33207	5	29.3	Secondary	1	1	YES	No	No	No	10	25.8	Live birth
39250	3	25.39	Primary	1	1	YES	No	No	No	9.5	26.1	Live birth
39087	1	22.03	Primary	1	1	YES	No	No	Yes	9.5	30.7	Live birth
31051	4	30.67	Secondary	2	1	YES	No	No	No	8.5	32.6	Live birth
30231	4	18.75	Primary	2	1	YES	No	No	No	10.3	32.3	Live birth
29946	2	19.14	Primary	1	1	YES	No	No	No	7.5	30.4	Live birth
18347	5	19.13	Secondary	1	1	YES	No	No	No	8	31.9	Live birth
29706	6	23.95	Secondary	1	1	YES	No	No	No	8	32.8	Live birth
32887	3	21.07	Primary	1	1	YES	No	No	No	7	30	Live birth
25982	4	25.39	Secondary	1	1	YES	No	Yes	No	10.2	31.3	Live birth
31323	5	19.57	Primary	1	1	YES	No	No	No	9.5	26	Live birth
32963	4	20.7	Primary	1	1	YES	No	No	No	8.5	29.1	Live birth
29260	3	17.75	Secondary	2	1	YES	No	Yes	No	9	29.1	Live birth
30521	1	18.59	Secondary	1	1	YES	No	No	No	13	26.2	Live birth
31614	3	20.69	Primary	1	1	YES	No	No	No	10.6	32.8	Live birth
34786	1	20.03	Primary	1	1	YES	No	No	No	12	32.4	Live birth
33732	4	20.2	Secondary	1	1	YES	No	No	No	8.7	28.9	Live birth
33712	2	22.49	Secondary	1	1	YES	No	No	No	10	26.3	Live birth
29025	1	20.28	Secondary	2	1	YES	No	No	No	9.8	33.3	Live birth
30809	4	18.69	Primary	2	1	YES	No	Yes	No	8	28.4	Live birth
38450	7	18.96	Secondary	1	1	YES	No	No	No	8	33	Live birth
33104	5	23.44	Primary	1	1	YES	No	No	No	8	33.1	Live birth
34898	3	25	Primary	1	1	YES	No	Yes	No	9.8	28.4	Live birth
27104	2	17.58	Secondary	2	1	YES	No	No	Yes	7.3	30.5	Live birth
31017	5	21.93	Secondary	1	1	YES	No	No	No	12	34.7	Live birth
31285	4	21.48	Secondary	2	1	YES	No	No	No	8.8	24.1	Live birth
39248	3	25.33	Primary	1	1	YES	No	No	No	7	29.1	Live birth
37047	3	21.51	Primary	1	1	YES	No	No	No	9	28.3	Live birth
33386	1	22.05	Secondary	2	1	YES	No	No	No	8.5	35	Live birth
32720	4	25	Secondary	1	1	YES	No	Yes	No	7.2	27.4	Live birth
35993	1	19.47	Primary	1	1	YES	No	No	No	8.5	33	Live birth
35393	3	18.83	Primary	1	1	YES	No	No	No	8	23.3	Live birth
33023	3	19.65	Primary	1	1	YES	No	No	No	8	22	Live birth
10635	4	17.63	Secondary	2	1	YES	No	No	No	12.3	32.8	Live birth
30716	2	18.43	Secondary	1	1	YES	No	No	No	7.7	28.9	Live birth
36042	3	20.7	Primary	2	1	YES	No	Yes	No	8.2	26.6	Live birth
30337	2	19.63	Primary	1	1	YES	No	No	No	11.2	27.1	Live birth
30052	1	23.07	Secondary	1	1	YES	No	No	No	11.7	32.4	Live birth
32514	4	20.72	Primary	1	1	YES	No	No	No	9.8	25.8	Live birth
34890	3	17.91	Primary	1	1	YES	No	Yes	No	9	29.6	Live birth
30587	7	17.72	Primary	1	1	YES	No	No	No	11.5	32.5	Live birth
33452	3	31.25	Primary	1	1	YES	No	No	No	11	22.9	Live birth
35578	3	17.99	Primary	1	1	YES	No	No	No	9.5	29.1	Live birth
33771	4	21.48	Primary	1	1	YES	No	No	No	7	24	Live birth
34868	5	18.82	Primary	1	1	YES	No	No	No	7.2	33.9	Live birth
39735	1	17.22	Secondary	1	1	YES	No	No	No	7	31.3	Live birth
33144	1	21.48	Secondary	1	1	YES	No	No	No	10.6	30.6	Live birth
34723	2	18.93	Primary	1	1	YES	No	Yes	No	12	28	Live birth
29515	1	24.14	Secondary	1	1	YES	No	No	No	10	26.3	Live birth
39764	4	21.45	Primary	1	1	YES	No	No	No	9	28	Live birth
37528	2	18.03	Secondary	2	1	YES	No	Yes	No	7	27.7	Live birth
30222	5	22.19	Secondary	2	1	YES	No	No	No	8.5	31.4	Live birth
33481	2	17.58	Secondary	1	1	YES	No	No	No	7.5	29.5	Live birth
27371	1	20.58	Secondary	1	1	YES	No	Yes	No	9.8	31.5	Live birth
34159	2	24.2	Secondary	2	1	YES	No	No	No	8.6	31.1	Live birth
30757	1	29.38	Primary	1	1	YES	No	No	No	8.5	24	Live birth
31028	2	26.84	Primary	1	1	YES	No	Yes	No	8	27.6	No live birth
31016	7	21.08	Primary	1	1	YES	No	No	No	9.2	25	No live birth
32492	1	20.83	Primary	1	1	YES	No	No	No	8.3	33.6	No live birth
21385	4	18.36	Primary	2	1	YES	No	No	No	7.2	32.7	No live birth
21468	7	22.86	Primary	2	1	YES	No	No	No	9.2	32.3	No live birth
23269	6	21.09	Secondary	1	1	YES	No	No	No	9	31.9	No live birth
24581	2	21.5	Secondary	2	1	YES	No	No	No	11	32	No live birth
24838	2	21.33	Primary	1	1	YES	No	No	No	11	27.6	No live birth
26022	1	16.82	Secondary	2	1	YES	No	No	No	7.5	29.6	No live birth
26438	1	17.44	Secondary	2	1	YES	No	No	No	7.5	31.4	No live birth
28423	7	22.89	Secondary	2	1	YES	No	No	No	9.7	33.7	No live birth
28917	2	18.73	Primary	1	1	YES	No	Yes	No	11.7	26	No live birth
30172	3	22.03	Primary	1	1	YES	No	No	No	9.3	34.4	No live birth
30368	5	22.89	Secondary	2	1	YES	No	No	No	10	30.4	No live birth
30469	8	23.59	Secondary	1	1	YES	No	No	No	12	33.9	No live birth
30726	7	23.42	Secondary	1	1	YES	No	No	No	9.3	32.5	No live birth
30732	3	22.6	Primary	1	1	YES	No	No	No	9	32	No live birth
30905	2	23.05	Primary	2	1	YES	No	No	No	11.7	26.3	No live birth
31042	2	18.59	Primary	1	1	YES	No	No	No	8.6	34.2	No live birth
31123	1	25.48	Secondary	1	1	YES	No	No	No	9.6	28.7	No live birth
31414	8	20.4	Secondary	1	1	YES	No	No	No	9.3	32.2	No live birth
31506	1	20.03	Primary	2	1	YES	No	Yes	No	8.8	29.9	No live birth
32059	2	21.1	Secondary	1	1	YES	No	No	No	7	32.2	No live birth
32089	2	20.31	Primary	2	1	YES	No	Yes	No	14	34.4	No live birth
32276	1	17.91	Secondary	2	1	YES	No	No	No	7	23.6	No live birth
32711	1	18.49	Primary	2	1	YES	No	No	No	8	25.3	No live birth
32873	4	21.78	Primary	1	1	YES	No	No	No	13.4	25.7	No live birth
32907	5	23.62	Primary	1	1	YES	No	No	No	11	31.8	No live birth
33277	2	23.23	Secondary	1	1	YES	No	No	No	8.5	31.8	No live birth
33298	1	18.29	Primary	1	1	YES	No	No	No	10.5	26.7	No live birth
33402	3	20.44	Secondary	1	1	YES	No	No	No	8	32.1	No live birth
33408	1	22.43	Secondary	2	1	YES	No	No	No	8.2	27.9	No live birth
33487	5	20.13	Secondary	1	1	YES	No	No	No	7	35.2	No live birth
33546	4	18.36	Primary	1	1	YES	No	Yes	No	11.4	31	No live birth
33655	2	19.61	Secondary	2	1	YES	No	No	No	7.5	35	No live birth
33703	2	26.35	Primary	1	1	YES	No	No	No	8	27.4	No live birth
33807	2	22.96	Secondary	1	1	YES	No	Yes	No	11.3	34.8	No live birth
33847	1	23.62	Secondary	1	1	YES	No	Yes	No	8	32	No live birth
33955	4	19.56	Secondary	1	1	YES	No	No	No	10	24.3	No live birth
34268	2	23.5	Primary	1	1	YES	No	No	No	7.5	35.9	No live birth
34372	2	20.34	Primary	1	1	YES	No	No	No	8	35.8	No live birth
34709	2	22.68	Primary	2	1	YES	No	No	No	9.1	28	No live birth
34963	8	25.97	Secondary	1	1	YES	No	Yes	No	7.7	33	No live birth
35358	1	19.92	Secondary	1	1	YES	No	No	No	10.1	24.8	No live birth
35474	3	21.09	Secondary	2	1	YES	No	No	No	8.9	25.3	No live birth
35564	1	26.04	Secondary	1	1	YES	No	No	No	7	31.1	No live birth
36453	3	16.02	Secondary	1	1	YES	No	No	No	10	31.6	No live birth
37223	3	23.63	Primary	1	1	YES	No	No	No	10	26.1	No live birth
37286	2	25.33	Primary	1	1	YES	No	No	No	12.2	34.9	No live birth
37548	5	21.63	Primary	2	1	YES	No	No	No	11.6	29.4	No live birth
37884	5	19.4	Secondary	1	1	YES	No	No	No	9	32.4	No live birth
37961	7	21.3	Secondary	2	1	YES	No	No	Yes	12	34	No live birth
38632	10	24.03	Secondary	1	1	YES	No	No	No	12	33.6	No live birth
39972	1	19.38	Primary	1	1	YES	No	No	No	8	24.5	No live birth
16537	3	21.09	Secondary	2	1	YES	No	No	No	10	29.5	No live birth
18029	8	20.4	Secondary	2	1	YES	No	No	No	7	35.8	No live birth
18573	1	18.83	Secondary	2	1	YES	No	No	No	12	33.1	No live birth
19519	1	19.47	Secondary	2	1	YES	No	No	No	11	27.8	No live birth
25074	1	18.9	Primary	1	1	YES	No	Yes	No	7	28.4	No live birth
25826	4	21.09	Primary	1	1	YES	No	No	No	10.6	25.2	No live birth
26487	1	19.68	Secondary	2	1	YES	No	No	No	10	28.7	No live birth
27804	1	21.94	Secondary	2	1	YES	No	No	No	8.5	31.5	No live birth
28098	5	18.37	Primary	1	1	YES	No	Yes	No	9	28	No live birth
28789	3	17.9	Primary	1	1	YES	No	No	No	9.6	30	No live birth
29344	3	18.75	Primary	1	1	YES	No	No	No	7.5	31	No live birth
29511	1	25.3	Secondary	2	1	YES	No	No	No	9	26.7	No live birth
29551	1	26.03	Secondary	2	1	YES	No	Yes	No	8	30.8	No live birth
29660	2	18.31	Primary	1	1	YES	No	No	No	9.2	30.4	No live birth
29773	2	20	Secondary	2	1	YES	No	No	No	10.2	32.7	No live birth
30238	2	20.03	Secondary	1	1	YES	No	No	No	9	30.9	No live birth
30256	2	19.72	Secondary	2	1	YES	No	No	No	7.8	35.4	No live birth
30292	6	17.8	Secondary	2	1	YES	No	No	No	8	34	No live birth
30347	3	17.04	Secondary	1	1	YES	No	No	No	7	33.7	No live birth
30377	1	15.63	Primary	1	1	YES	No	No	No	10	33.2	No live birth
30460	9	21.48	Secondary	2	1	YES	No	No	No	7	31.4	No live birth
30525	1	24.22	Secondary	1	1	YES	No	No	No	9	31.3	No live birth
30538	5	18.36	Secondary	1	1	YES	No	No	No	7.5	25.4	No live birth
30676	2	18.37	Primary	1	1	YES	No	No	No	8.4	28.1	No live birth
30730	2	20.94	Primary	1	1	YES	No	Yes	No	10.1	31.4	No live birth
30773	5	25.39	Secondary	2	1	YES	No	No	No	8	31.5	No live birth
30855	1	19.83	Primary	1	1	YES	No	No	No	8	35.7	No live birth
30933	3	19.29	Primary	1	1	YES	No	No	No	9.9	29	No live birth
30999	3	16	Primary	1	1	YES	No	No	No	13.3	35.1	No live birth
31034	6	20.2	Secondary	1	1	YES	No	No	No	8	30.3	No live birth
31036	1	19.81	Primary	1	1	YES	No	No	No	10.8	28.7	No live birth
31077	7	23.44	Secondary	2	1	YES	No	No	No	8.4	28.4	No live birth
31160	2	19.88	Secondary	1	1	YES	No	Yes	No	7.5	34.7	No live birth
31331	2	29.3	Secondary	1	1	YES	No	No	No	9.1	27.5	No live birth
31357	1	26.04	Secondary	1	1	YES	No	No	No	9.3	31.9	No live birth
31404	1	25.2	Primary	1	1	YES	No	Yes	No	9	26.1	No live birth
31410	5	19.53	Secondary	1	1	YES	No	Yes	No	11	32.6	No live birth
31420	3	20.82	Secondary	1	1	YES	No	No	No	8.9	29	No live birth
31514	1	20.57	Secondary	1	1	YES	No	No	No	10.2	23.2	No live birth
31658	1	22.86	Secondary	1	1	YES	No	No	No	10.5	29	No live birth
31708	2	18.43	Primary	1	1	YES	No	No	No	10.5	28.1	No live birth
31746	4	25.33	Secondary	2	1	YES	No	No	No	10.5	29.5	No live birth
31832	3	24.03	Secondary	2	1	YES	No	No	No	8.5	26.9	No live birth
31890	3	19.31	Secondary	2	1	YES	No	No	No	8	29.1	No live birth
31893	1	21.16	Secondary	2	1	YES	No	No	No	8.5	27.4	No live birth
31904	5	21.88	Primary	1	1	YES	No	No	No	8.1	30.6	No live birth
31956	2	22.03	Secondary	1	1	YES	No	No	No	8	27.8	No live birth
32026	10	28.44	Secondary	1	1	YES	No	Yes	No	9.2	31	No live birth
32041	3	21.63	Secondary	2	1	YES	No	No	No	9.5	34.7	No live birth
32178	1	26.67	Secondary	2	1	YES	No	No	No	9.6	33.9	No live birth
32218	2	21.08	Secondary	1	1	YES	No	No	No	7.1	22.5	No live birth
32370	3	27.47	Secondary	2	1	YES	No	Yes	No	7.3	28.5	No live birth
32409	3	21.23	Primary	1	1	YES	No	No	No	9.2	29.7	No live birth
32455	2	17.58	Secondary	1	1	YES	No	No	No	8	28.7	No live birth
32578	1	20.66	Secondary	1	1	YES	No	Yes	No	7	29.6	No live birth
32721	4	24.03	Secondary	1	1	YES	No	No	No	10.7	26.6	No live birth
32772	7	22.89	Primary	1	1	YES	No	No	No	8	24.8	No live birth
32859	1	19.56	Secondary	2	1	YES	No	No	No	9	33.7	No live birth
33058	3	22.43	Primary	1	1	YES	No	No	No	11.1	27.3	No live birth
33085	2	22.77	Secondary	1	1	YES	No	No	No	10	31.5	No live birth
33109	4	17.19	Primary	2	1	YES	No	No	No	8	29.7	No live birth
33154	3	20.44	Secondary	1	1	YES	No	No	No	8.5	22.1	No live birth
33175	1	25.39	Secondary	1	1	YES	No	No	No	8.5	32.7	No live birth
33182	5	25.39	Secondary	1	1	YES	No	No	No	7.5	32.1	No live birth
33192	1	21.8	Secondary	1	1	YES	No	No	No	8.2	31.9	No live birth
33244	2	22.83	Secondary	1	1	YES	No	No	No	8.5	35.2	No live birth
33371	6	22.6	Primary	2	1	YES	No	No	No	9.2	34.1	No live birth
33400	6	21.09	Secondary	1	1	YES	No	No	No	9	33.4	No live birth
33438	3	19.14	Primary	1	1	YES	No	Yes	No	9	25.9	No live birth
33513	6	22.83	Secondary	2	1	YES	No	No	No	12.7	27.4	No live birth
33588	2	21.17	Secondary	2	1	YES	No	No	No	7.2	32.6	No live birth
33613	6	22.21	Secondary	2	1	YES	No	Yes	No	7	35.1	No live birth
33758	13	25.34	Secondary	1	1	YES	No	No	No	10.6	35.3	No live birth
33823	5	20.31	Secondary	1	1	YES	No	No	No	10	27.6	No live birth
33842	2	18.59	Secondary	1	1	YES	No	No	No	8	24.2	No live birth
33876	7	15.63	Primary	1	1	YES	No	No	No	12.3	27.6	No live birth
33983	1	19.63	Secondary	1	1	YES	No	No	No	8	25.9	No live birth
34070	6	21.88	Primary	1	1	YES	No	No	No	10	25.3	No live birth
34113	1	23.83	Secondary	1	1	YES	No	No	No	7.5	30.8	No live birth
34170	6	20.57	Primary	2	1	YES	No	No	No	9	33.5	No live birth
34362	3	20.08	Secondary	1	1	YES	No	No	No	8	33.6	No live birth
34388	4	25.82	Primary	2	1	YES	No	No	No	9	26.6	No live birth
34512	1	21.64	Primary	1	1	YES	No	No	No	10	28.9	No live birth
34601	1	21.64	Secondary	1	1	YES	No	No	No	7	33.9	No live birth
34623	5	21.88	Primary	1	1	YES	No	No	No	11	30.6	No live birth
34635	5	20.03	Primary	2	1	YES	No	No	No	8.9	30.2	No live birth
34651	3	19.96	Secondary	2	1	YES	No	No	No	7.5	35.4	No live birth
34911	5	17.63	Primary	1	1	YES	No	No	No	8.5	29.9	No live birth
34922	8	20.08	Primary	1	1	YES	No	Yes	No	9.6	28.9	No live birth
35202	4	30.22	Primary	1	1	YES	No	No	No	8	32.9	No live birth
35394	1	21.23	Secondary	1	1	YES	No	No	No	11	29.5	No live birth
35448	6	18.78	Secondary	1	1	YES	No	No	No	10	32.1	No live birth
35485	1	20.31	Primary	2	1	YES	No	No	No	10	28.4	No live birth
35514	5	16.41	Primary	1	1	YES	No	Yes	No	10.6	30.2	No live birth
35696	1	20.13	Secondary	1	1	YES	No	No	No	8.1	30	No live birth
35751	9	21.64	Primary	2	1	YES	No	No	No	8	33.5	No live birth
35774	1	20.94	Secondary	1	1	YES	No	No	No	9	30.3	No live birth
35941	5	20	Primary	1	1	YES	No	No	No	7	25	No live birth
36086	1	15.82	Primary	1	1	YES	No	No	Yes	8.2	25.3	No live birth
36094	4	23.44	Secondary	2	1	YES	No	No	No	9	31.8	No live birth
36268	7	17.31	Secondary	1	1	YES	No	No	No	8.5	26.3	No live birth
36491	5	19.88	Primary	1	1	YES	No	Yes	No	9	30.7	No live birth
36675	3	23.23	Primary	2	1	YES	No	Yes	No	8.5	30.8	No live birth
36700	4	24.17	Primary	2	1	YES	No	No	No	10	24.1	No live birth
36762	2	19.53	Primary	1	1	YES	No	Yes	No	8.5	25.6	No live birth
36778	2	23.23	Secondary	1	1	YES	No	No	No	9.5	27.9	No live birth
36821	4	24.84	Secondary	2	1	YES	No	No	No	9.6	28.7	No live birth
36941	2	18.73	Primary	1	1	YES	No	No	No	9.5	24.4	No live birth
37060	3	23.19	Secondary	1	1	YES	No	No	No	9	32.7	No live birth
37067	4	20.44	Secondary	1	1	YES	No	No	No	7	31.7	No live birth
37183	1	19.56	Secondary	1	1	YES	No	No	No	8.5	32	No live birth
37199	1	23.05	Secondary	1	1	YES	No	No	No	8	32.3	No live birth
37254	6	18.65	Primary	1	1	YES	No	Yes	No	7.5	29.5	No live birth
37424	5	25.71	Secondary	1	1	YES	No	No	No	7.4	35.6	No live birth
37466	5	18.73	Secondary	2	1	YES	No	No	No	7	34.8	No live birth
37479	2	18.66	Secondary	1	1	YES	No	No	No	8	23.3	No live birth
37508	2	24.03	Secondary	1	1	YES	No	No	No	12.2	33.7	No live birth
37515	2	20.7	Secondary	2	1	YES	No	No	No	10	32.8	No live birth
37519	4	22.83	Primary	1	1	YES	No	No	No	10	34.1	No live birth
37908	9	22.34	Secondary	1	1	YES	No	No	No	13	34	No live birth
37945	7	24.44	Secondary	1	1	YES	No	No	No	8.8	29.7	No live birth
38113	6	18.49	Primary	1	1	YES	No	No	No	9.8	29.4	No live birth
38164	3	21.83	Primary	2	1	YES	No	No	No	10	30.1	No live birth
38212	3	24.44	Primary	1	1	YES	No	No	No	12	27	No live birth
38305	2	17.99	Primary	2	1	YES	No	No	No	9	26.2	No live birth
38354	3	26.37	Secondary	1	1	YES	No	No	No	8	29.8	No live birth
38898	2	23.44	Primary	1	1	YES	No	No	No	8	26.8	No live birth
39064	5	29.55	Secondary	1	1	YES	No	No	No	8.3	30	No live birth
39377	2	21.23	Secondary	2	1	YES	No	No	No	7	35	No live birth
39525	5	18.59	Primary	1	1	YES	No	No	No	8.2	27.9	No live birth
39779	8	17.12	Primary	1	1	YES	No	No	No	7.5	31.5	No live birth
32117	3	24.46	Primary	1	1	YES	No	No	No	7.8	27	No live birth
32900	5	26.67	Primary	1	1	YES	No	No	No	7	24.9	No live birth
37351	5	30.86	Secondary	2	1	YES	No	Yes	No	10.8	25.5	No live birth
19521	1	20.81	Secondary	2	1	YES	No	No	No	10.6	31.6	No live birth
29992	1	20.32	Secondary	1	1	YES	No	No	No	9	30.5	No live birth
35803	5	24.84	Secondary	1	1	YES	No	Yes	No	8.5	34.5	No live birth
28597	7	27.97	Primary	1	1	YES	No	Yes	No	9.1	35	No live birth
31740	2	25.1	Secondary	2	1	YES	No	Yes	No	12	33.3	No live birth
33577	4	16.85	Primary	1	1	YES	No	No	No	10.7	23.9	No live birth
35234	5	26.04	Primary	2	1	YES	No	Yes	No	11.5	31.3	No live birth
33360	2	23.63	Secondary	1	1	YES	No	No	No	7.5	31	No live birth
32662	1	24.61	Secondary	2	1	YES	No	No	No	8	31	No live birth
31705	2	18.29	Primary	1	1	YES	No	No	No	9.4	25.1	No live birth
32130	4	32.87	Secondary	1	1	YES	No	No	No	11.6	31.3	No live birth
33485	3	23.23	Secondary	1	1	YES	No	No	No	10	27.5	No live birth
35516	2	19.91	Primary	1	1	YES	No	No	No	8.7	30.1	No live birth
36731	3	17.01	Secondary	1	1	YES	No	Yes	No	9	24.5	No live birth
31750	5	24.17	Primary	1	1	YES	No	Yes	No	8	29.4	No live birth
33213	3	23.5	Primary	1	1	YES	No	No	No	10.3	26.7	No live birth
30791	4	24.97	Secondary	1	1	YES	No	Yes	No	10.3	29.6	No live birth
36800	3	23.83	Primary	1	1	YES	No	Yes	No	12.3	28.7	No live birth
33540	5	22.83	Primary	1	1	YES	No	No	No	9	28.5	No live birth
38868	2	16.41	Primary	1	1	YES	No	No	No	12.7	31	No live birth
32646	4	23.44	Primary	1	1	YES	No	No	No	9.5	30.4	No live birth
32920	4	19.53	Primary	1	1	YES	No	Yes	No	9	30	No live birth
35982	4	27.55	Secondary	1	1	YES	No	No	No	10	32.8	No live birth
32058	3	28.04	Secondary	2	1	YES	No	Yes	No	8	29.5	No live birth
32136	10	26.37	Primary	1	1	YES	No	Yes	No	9	31.5	No live birth
33622	7	24.56	Secondary	1	1	YES	No	No	No	7.5	26.1	No live birth
33150	2	20.61	Secondary	1	1	YES	No	No	No	10	33.8	No live birth
31977	16	24.56	Primary	1	1	YES	No	Yes	No	9.2	35.7	No live birth
28515	3	20	Secondary	2	1	YES	No	No	No	7.5	22.2	No live birth
29320	3	21.77	Secondary	2	1	YES	No	Yes	No	10	27.5	No live birth
36983	3	19.56	Secondary	1	1	YES	No	No	No	10	23.9	No live birth
39418	2	20.44	Primary	1	1	YES	No	No	No	9	29.8	No live birth
25941	2	22.22	Secondary	2	1	YES	No	No	No	8.5	34.1	No live birth
32323	3	22.03	Primary	1	1	YES	No	No	No	10.9	30.5	No live birth
32582	3	16.89	Primary	1	1	YES	No	No	No	8.4	22.8	No live birth
33334	2	21.88	Primary	1	1	YES	No	No	No	8	29.7	No live birth
35283	5	18.73	Primary	1	1	YES	No	No	No	8	30.3	No live birth
37378	2	24.84	Secondary	1	1	YES	No	No	No	8	35.2	No live birth
27618	10	20.57	Secondary	2	1	YES	No	No	No	8.5	33.7	No live birth
29492	1	21.22	Secondary	2	1	YES	No	Yes	No	8.5	34.9	No live birth
30354	6	23.05	Primary	1	1	YES	No	No	No	9.8	33	No live birth
30409	1	20.96	Primary	2	1	YES	No	No	No	8.8	31.1	No live birth
30570	2	21.19	Primary	2	1	YES	No	Yes	No	8	28.1	No live birth
30616	5	25.22	Secondary	2	1	YES	No	Yes	No	10	32.1	No live birth
30744	2	20.42	Secondary	1	1	YES	No	Yes	No	7	33.7	No live birth
32307	3	23.63	Secondary	1	1	YES	No	No	No	11	32.8	No live birth
32828	7	21.33	Primary	1	1	YES	No	No	No	9	33.1	No live birth
32883	4	21.81	Secondary	1	1	YES	No	No	No	14	25	No live birth
32926	10	24.44	Primary	2	1	YES	No	No	No	10	28	No live birth
32929	8	23.18	Secondary	1	1	YES	No	No	No	9	32.5	No live birth
33342	1	22.68	Secondary	1	1	YES	No	No	No	8	31.3	No live birth
33477	1	17.97	Primary	1	1	YES	No	No	Yes	10.5	31.4	No live birth
35856	2	20.34	Secondary	1	1	YES	No	No	No	8.5	35.5	No live birth
36190	2	20.96	Primary	1	1	YES	No	No	No	9.4	24.8	No live birth
36271	1	20.43	Primary	1	1	YES	No	No	No	14.5	27.7	No live birth
36412	6	26.67	Primary	2	1	YES	No	No	No	11.8	28.9	No live birth
36559	14	27.06	Primary	2	1	YES	No	No	No	7	34.4	No live birth
37663	5	22.03	Primary	1	1	YES	No	No	No	9	30.6	No live birth
37916	2	27.01	Primary	1	1	YES	No	No	No	8.5	25.3	No live birth
38615	2	18.82	Primary	2	1	YES	No	No	No	8	30.8	No live birth
26858	3	17.4	Secondary	2	1	YES	No	No	No	9	29.3	No live birth
28646	2	19.23	Primary	1	1	YES	No	No	No	8	30.4	No live birth
29045	4	29	Secondary	2	1	YES	No	Yes	No	11.6	34.8	No live birth
29709	5	20.43	Secondary	1	1	YES	No	No	No	11	27.2	No live birth
30663	4	28.89	Secondary	1	1	YES	No	No	No	8	32	No live birth
31207	1	21.5	Secondary	2	1	YES	No	Yes	No	10.2	27.7	No live birth
33383	2	25.81	Secondary	1	1	YES	No	No	No	12.5	24.3	No live birth
33677	5	28.3	Secondary	1	1	YES	No	No	No	9.8	27.8	No live birth
34336	3	19.07	Secondary	2	1	YES	No	No	No	9.4	32.7	No live birth
34649	3	22.03	Primary	1	1	YES	No	No	No	7	31.8	No live birth
35708	4	18.82	Secondary	2	1	YES	No	Yes	No	8.3	27.6	No live birth
35789	1	23.44	Primary	1	1	YES	No	No	No	9	26	No live birth
36688	11	30.08	Secondary	2	1	YES	No	Yes	No	11	26.9	No live birth
37905	2	19.98	Secondary	1	1	YES	No	No	No	9	35.3	No live birth
38636	3	19.14	Primary	1	1	YES	No	No	No	10.6	31.4	No live birth
38735	6	16.61	Primary	2	1	YES	No	No	No	9	31.2	No live birth
28153	3	21.93	Primary	2	2	YES	Yes	Yes	No	10	30.1	Live birth
34254	1	22.27	Secondary	1	2	YES	Yes	No	No	8	25.1	Live birth
34763	9	22.83	Secondary	1	2	YES	Yes	No	No	11	32.3	Live birth
32648	9	23.11	Primary	2	2	YES	Yes	No	No	9	32.5	Live birth
30258	4	22.04	Secondary	2	2	YES	Yes	No	No	9.1	31.7	Live birth
29133	1	24.03	Secondary	2	2	YES	Yes	No	No	7.5	27.7	Live birth
39531	8	20.93	Primary	1	2	YES	Yes	No	No	8	27.5	Live birth
36296	3	21.72	Primary	1	2	YES	Yes	No	No	9	34.5	Live birth
29043	2	22.43	Secondary	2	2	YES	Yes	No	No	7	30.2	Live birth
33334	2	21.88	Secondary	2	2	YES	Yes	No	No	8	30.1	Live birth
35167	4	23.53	Primary	2	2	YES	Yes	No	No	14	26.2	Live birth
35723	2	20.2	Primary	1	2	YES	Yes	No	No	10.3	24.3	Live birth
33352	1	18.13	Primary	1	2	YES	Yes	No	No	8	30.9	Live birth
36189	3	22.66	Secondary	1	2	YES	Yes	No	No	8.5	29.6	Live birth
37858	3	18.73	Secondary	1	2	YES	Yes	No	No	8.1	29.2	Live birth
32772	7	22.89	Primary	2	2	YES	Yes	No	No	7.5	25	Live birth
31129	5	28.13	Primary	2	2	YES	Yes	No	No	11	30.5	Live birth
32991	5	20.7	Secondary	2	2	YES	Yes	No	No	8.5	32.3	Live birth
31902	2	17.36	Secondary	2	2	YES	Yes	No	No	7	33.3	Live birth
18942	1	20.7	Secondary	2	2	YES	Yes	No	No	9.4	33.6	Live birth
32594	3	20.03	Secondary	2	2	YES	Yes	No	No	10.4	34.3	Live birth
26321	2	19.72	Secondary	2	2	YES	Yes	No	No	10.9	22.3	Live birth
29641	1	20.2	Primary	2	2	YES	Yes	Yes	No	10	26.9	Live birth
34772	2	22.83	Secondary	2	2	YES	Yes	No	No	7.5	32.9	Live birth
31858	4	23.11	Primary	1	2	YES	Yes	No	No	8.2	32.3	Live birth
37622	1	21.83	Secondary	2	2	YES	Yes	No	No	8	27.3	Live birth
37083	1	19.14	Secondary	1	2	YES	Yes	No	No	11.8	29.9	Live birth
37827	6	17.58	Secondary	1	2	YES	Yes	No	No	8	29.9	Live birth
17444	1	27.82	Secondary	2	2	YES	Yes	No	No	10	27.2	Live birth
38111	2	17.99	Primary	1	2	YES	Yes	No	No	9	27.8	Live birth
32764	2	19.53	Primary	2	2	YES	Yes	No	No	7	33.6	Live birth
34999	1	17.22	Secondary	2	2	YES	Yes	No	No	7.3	24.4	Live birth
16906	3	18.9	Primary	2	2	YES	Yes	No	No	8.5	27.5	Live birth
22581	3	20.57	Secondary	2	2	YES	Yes	No	No	8	31	Live birth
38506	4	22.48	Primary	2	2	YES	Yes	No	No	9	26.1	Live birth
23269	5	21.09	Secondary	2	2	YES	Yes	No	No	7.2	32	Live birth
34062	3	18.03	Primary	2	2	YES	Yes	No	No	9	33	Live birth
34631	2	22.27	Secondary	2	2	YES	Yes	No	No	11	26.5	Live birth
32079	5	20.94	Primary	2	2	YES	Yes	Yes	No	9.7	27	Live birth
35687	2	23.12	Primary	2	2	YES	Yes	No	No	9	32.8	Live birth
21272	4	25	Secondary	2	2	YES	Yes	No	No	10.2	30.8	Live birth
36338	4	23.71	Primary	1	2	YES	Yes	No	No	8	27.3	Live birth
39401	1	22.77	Secondary	1	2	YES	Yes	No	No	9	32.6	Live birth
31002	3	18.44	Secondary	2	2	YES	Yes	No	No	8.4	32.2	Live birth
31420	3	20.82	Secondary	2	2	YES	Yes	No	No	11	29.1	Live birth
30175	5	20.2	Primary	1	2	YES	Yes	No	No	9	25.6	Live birth
39441	3	28.35	Secondary	2	2	YES	Yes	No	No	10	32.9	Live birth
32937	5	19.53	Secondary	2	2	YES	Yes	No	No	8	35.2	Live birth
37183	1	19.56	Secondary	2	2	YES	Yes	No	No	9	32.2	Live birth
38516	5	24.34	Secondary	2	2	YES	Yes	No	No	9	26.7	Live birth
30415	2	21.79	Secondary	2	2	YES	Yes	No	No	9.7	26.1	Live birth
38998	2	20.03	Secondary	1	2	YES	Yes	No	No	7	30.2	Live birth
33027	1	19.14	Secondary	2	2	YES	Yes	No	No	7.5	29.3	Live birth
36908	2	18.67	Secondary	2	2	YES	Yes	No	No	8.5	30	Live birth
35006	4	24.77	Primary	2	2	YES	Yes	No	No	9	33.9	Live birth
36434	2	21.45	Primary	1	2	YES	Yes	No	No	9.6	32.2	Live birth
30114	5	18.75	Secondary	1	2	YES	Yes	No	Yes	7.2	31.3	Live birth
29802	2	18.49	Secondary	2	2	YES	Yes	No	No	8.5	30	Live birth
39878	4	18.03	Secondary	1	2	YES	Yes	No	No	8.4	31.9	Live birth
37878	5	20.83	Secondary	2	2	YES	Yes	No	No	11	32.2	Live birth
36044	1	18.51	Primary	2	2	YES	Yes	No	Yes	8	30.9	Live birth
31996	2	20.43	Primary	1	2	YES	Yes	Yes	No	8.5	28	Live birth
36666	3	27.43	Primary	1	2	YES	Yes	Yes	No	9.9	25.5	Live birth
36491	5	19.88	Primary	2	2	YES	Yes	Yes	No	8	31.1	Live birth
32566	2	18.59	Secondary	2	2	YES	Yes	No	No	10	30.4	Live birth
35060	2	21.64	Secondary	2	2	YES	Yes	No	No	8.5	30	Live birth
32912	5	19.2	Secondary	2	2	YES	Yes	No	No	9	35.9	Live birth
29457	2	20.57	Secondary	2	2	YES	Yes	No	No	9	27.3	Live birth
21800	4	18.91	Secondary	2	2	YES	Yes	No	Yes	12	33.4	Live birth
30898	3	19.95	Primary	1	2	YES	Yes	Yes	No	10	26.2	Live birth
28575	3	21.09	Primary	2	2	YES	Yes	No	No	11	28.8	Live birth
38458	1	25.22	Primary	2	2	YES	Yes	Yes	No	8	31.5	Live birth
30855	1	19.83	Primary	2	2	YES	Yes	No	No	8.5	35.8	Live birth
34370	6	18.73	Primary	2	2	YES	Yes	No	No	12	29.2	Live birth
35275	1	25.4	Primary	1	2	YES	Yes	No	No	10.2	35.7	Live birth
38021	1	24.56	Secondary	1	2	YES	Yes	Yes	No	9.8	34.8	Live birth
28739	6	22.66	Primary	2	2	YES	Yes	Yes	No	12.8	29.5	Live birth
33608	7	20	Secondary	2	2	YES	Yes	No	No	9.5	34.7	Live birth
38992	1	21.88	Secondary	1	2	YES	Yes	No	No	9	31.3	Live birth
24604	3	23.05	Primary	2	2	YES	Yes	No	No	10.6	31.9	Live birth
33672	5	20.31	Primary	1	2	YES	Yes	No	Yes	11.7	27.7	Live birth
32461	2	21.23	Secondary	1	2	YES	Yes	No	No	8.4	24.7	Live birth
35782	7	17.97	Secondary	1	2	YES	Yes	Yes	No	8.6	29.3	Live birth
39021	4	17.47	Primary	2	2	YES	Yes	No	No	9	26.2	Live birth
37156	3	21.37	Secondary	1	2	YES	Yes	No	No	8.6	32.4	Live birth
18244	7	18.66	Secondary	2	2	YES	Yes	No	No	10.3	33.5	Live birth
35698	2	21.23	Primary	1	2	YES	Yes	No	No	10.3	30.7	Live birth
35514	5	16.41	Primary	2	2	YES	Yes	Yes	No	8.5	30.4	Live birth
29718	2	22.27	Secondary	2	2	YES	Yes	No	No	9.4	28.7	Live birth
28613	3	22.1	Primary	2	2	YES	Yes	No	No	10	26.9	Live birth
32031	1	20.03	Secondary	1	2	YES	Yes	No	No	9.8	28.3	Live birth
30983	1	18.03	Secondary	1	2	YES	Yes	No	No	8	29.1	Live birth
34406	3	19.14	Primary	2	2	YES	Yes	No	No	9	28.7	Live birth
30627	1	25.65	Secondary	2	2	YES	Yes	No	No	10	32.8	Live birth
34198	3	28.84	Secondary	1	2	YES	Yes	No	No	10.2	27.8	Live birth
38626	4	22.94	Primary	2	2	YES	Yes	No	No	9	22.1	Live birth
32228	1	20.2	Secondary	2	2	YES	Yes	No	No	8.4	35.3	Live birth
29900	4	16.9	Primary	2	2	YES	Yes	No	No	7.1	28.9	Live birth
34564	7	22.04	Secondary	1	2	YES	Yes	No	No	8.5	31.4	Live birth
34311	2	19.81	Primary	1	2	YES	Yes	No	No	9.2	27.5	Live birth
26700	3	23.23	Primary	1	2	YES	Yes	Yes	No	9	30.3	Live birth
29919	2	19.3	Secondary	2	2	YES	Yes	No	Yes	8	30.9	Live birth
34923	2	24.14	Primary	2	2	YES	Yes	No	No	9	28.8	Live birth
37729	2	21.1	Secondary	2	2	YES	Yes	No	No	7.5	27.8	Live birth
29843	6	22.03	Secondary	2	2	YES	Yes	No	No	8.5	33.4	Live birth
26389	4	21.64	Secondary	2	2	YES	Yes	No	No	8	35.9	Live birth
29297	2	22.22	Primary	2	2	YES	Yes	No	No	8.5	35.9	Live birth
35685	2	26.35	Primary	2	2	YES	Yes	No	No	9	31.6	Live birth
31904	5	21.22	Primary	2	2	YES	Yes	No	No	8.2	31.2	Live birth
30328	2	20.13	Primary	1	2	YES	Yes	No	No	8	27.2	Live birth
38511	2	23.23	Secondary	2	2	YES	Yes	No	No	10.4	30.2	Live birth
37345	1	19.23	Primary	2	2	YES	Yes	No	No	11.2	25.8	Live birth
37442	1	20.55	Secondary	2	2	YES	Yes	No	No	7	26.9	Live birth
29346	2	21.1	Secondary	1	2	YES	Yes	No	No	8.1	32.2	Live birth
30937	4	20.81	Secondary	2	2	YES	Yes	No	No	7.5	25.3	Live birth
35469	5	22.27	Secondary	2	2	YES	Yes	No	No	8	33.6	Live birth
31672	6	21.72	Secondary	1	2	YES	Yes	No	No	13	28.4	Live birth
36389	1	20.03	Secondary	1	2	YES	Yes	No	No	12	36	Live birth
39361	1	24.84	Secondary	1	2	YES	Yes	No	No	9	34.7	Live birth
34073	1	17.9	Secondary	2	2	YES	Yes	No	No	8	35.9	Live birth
25881	3	24.03	Secondary	2	2	YES	Yes	No	No	7.4	32.6	Live birth
38012	7	20.08	Secondary	2	2	YES	Yes	No	No	8	28.6	Live birth
35506	4	26.95	Primary	2	2	YES	Yes	Yes	No	10	25.5	Live birth
24683	3	21.1	Secondary	2	2	YES	Yes	No	No	10	32.6	Live birth
37316	2	22.21	Secondary	2	2	YES	Yes	No	No	8.4	34	Live birth
33123	7	26.95	Primary	2	2	YES	Yes	No	No	12	31.7	Live birth
33497	8	21.23	Primary	2	2	YES	Yes	No	No	10	29.1	Live birth
31554	1	30.86	Secondary	2	2	YES	Yes	No	No	12.9	24.4	Live birth
32307	3	23.63	Secondary	2	2	YES	Yes	No	No	9	33.3	Live birth
32687	3	21.78	Secondary	2	2	YES	Yes	No	No	10.4	30.7	Live birth
31912	1	21.45	Primary	1	2	YES	Yes	No	No	10.7	26.6	Live birth
36703	1	22.31	Primary	2	2	YES	Yes	No	No	10	26	Live birth
34458	3	18.82	Primary	1	2	YES	Yes	No	No	11	27.3	Live birth
29890	1	24.44	Secondary	2	2	YES	Yes	No	No	12	28.4	Live birth
35396	7	18	Primary	1	2	YES	Yes	Yes	No	9	26.5	Live birth
37746	2	25.78	Secondary	1	2	YES	Yes	No	No	8	29.1	Live birth
38092	2	20.28	Primary	1	2	YES	Yes	No	No	12	28.9	Live birth
37323	4	22.22	Primary	2	2	YES	Yes	No	No	9	31.1	Live birth
36197	1	20.96	Secondary	1	2	YES	Yes	No	No	9.5	30.7	Live birth
29891	9	17.91	Secondary	1	2	YES	Yes	No	No	10.4	28.3	Live birth
33440	2	19.14	Primary	1	2	YES	Yes	No	No	8.9	29.1	Live birth
37057	2	27.55	Secondary	2	2	YES	Yes	No	No	7	31.7	Live birth
32082	3	18.75	Primary	1	2	YES	Yes	No	No	9	32.1	Live birth
34509	4	20.2	Secondary	2	2	YES	Yes	No	No	11	27.7	Live birth
39549	4	20.7	Secondary	2	2	YES	Yes	No	No	8.5	35.6	Live birth
31862	7	19.92	Primary	2	2	YES	Yes	No	No	10.2	34	Live birth
37135	7	29.24	Secondary	1	2	YES	Yes	Yes	No	7.8	33.1	Live birth
38134	2	21.48	Primary	1	2	YES	Yes	No	No	13	27.4	Live birth
34981	1	20.83	Secondary	2	2	YES	Yes	No	No	8.6	33.8	Live birth
36120	2	18.37	Primary	2	2	YES	Yes	No	No	8.5	25.9	Live birth
37646	1	22.31	Secondary	1	2	YES	Yes	No	No	9.5	31.2	Live birth
35353	8	21.08	Primary	1	2	YES	Yes	No	No	8.6	30.2	Live birth
32115	2	17.01	Secondary	2	2	YES	Yes	No	No	11.1	28.4	Live birth
37123	5	18.07	Primary	1	2	YES	Yes	Yes	No	7.5	27.6	Live birth
32550	4	21.5	Primary	2	2	YES	Yes	No	No	7.5	26.6	Live birth
39257	2	24.97	Primary	2	2	YES	Yes	No	No	8.7	26.4	Live birth
39269	7	17.63	Primary	1	2	YES	Yes	No	No	8	28.4	Live birth
35224	3	25.22	Primary	2	2	YES	Yes	Yes	No	12.1	29.6	Live birth
22278	1	19.33	Secondary	2	2	YES	Yes	No	No	8	32.8	Live birth
31586	2	18.9	Secondary	1	2	YES	Yes	No	No	10	32.5	Live birth
29809	2	27.34	Secondary	2	2	YES	Yes	No	No	11	25.3	Live birth
39067	1	27.64	Secondary	1	2	YES	Yes	No	No	8.5	35.5	Live birth
36680	4	19.63	Secondary	2	2	YES	Yes	No	No	9	27.2	Live birth
37128	2	21.23	Secondary	2	2	YES	Yes	No	No	8	33.8	Live birth
34165	1	21.63	Secondary	2	2	YES	Yes	No	Yes	9	31.5	Live birth
33251	3	20.28	Primary	2	2	YES	Yes	No	No	10	28	Live birth
34765	4	19.07	Secondary	2	2	YES	Yes	No	No	7	34.4	Live birth
32955	1	20.2	Secondary	2	2	YES	Yes	No	No	11	30.5	Live birth
39258	4	20.81	Primary	2	2	YES	Yes	No	No	10	32.1	Live birth
33603	9	25.22	Secondary	1	2	YES	Yes	Yes	No	11	31	Live birth
33296	9	29.33	Primary	2	2	YES	Yes	No	No	8	35.6	Live birth
34542	4	19.68	Secondary	1	2	YES	Yes	No	No	10	35.8	Live birth
38519	1	19.63	Secondary	2	2	YES	Yes	No	No	8.9	31.7	Live birth
32774	4	19.65	Primary	1	2	YES	Yes	No	No	11.2	30.1	Live birth
28184	2	26.13	Secondary	2	2	YES	Yes	No	No	10.7	26.1	Live birth
35491	3	21.77	Primary	2	2	YES	Yes	No	No	12	31.2	Live birth
39444	5	21.56	Secondary	1	2	YES	Yes	No	No	7.5	34.6	Live birth
33087	2	18.07	Secondary	2	2	YES	Yes	No	No	8	32.1	Live birth
29288	7	25.4	Primary	1	2	YES	Yes	No	No	9	26.9	Live birth
39308	2	18.75	Primary	1	2	YES	Yes	Yes	No	9	29	Live birth
22526	6	19.84	Secondary	2	2	YES	Yes	No	No	9	29.5	Live birth
37519	2	22.83	Primary	2	2	YES	Yes	No	No	9.7	34.1	Live birth
34321	1	21.64	Secondary	2	2	YES	Yes	No	No	7.5	34.6	Live birth
31219	1	20.96	Secondary	1	2	YES	Yes	Yes	No	9.7	22.8	Live birth
32243	1	27.34	Secondary	1	2	YES	Yes	No	No	9.4	27.6	Live birth
38040	2	22.64	Primary	1	2	YES	Yes	Yes	No	8.5	27.1	Live birth
32393	2	21.09	Secondary	2	2	YES	Yes	No	No	9.5	30.5	Live birth
34582	1	25.22	Secondary	2	2	YES	Yes	No	No	7	35.1	Live birth
36271	1	20.43	Secondary	2	2	YES	Yes	No	No	9	28.1	Live birth
37800	4	19.3	Primary	1	2	YES	Yes	Yes	No	9	33	Live birth
27980	2	24.65	Primary	1	2	YES	Yes	No	No	12.3	26.4	Live birth
37082	1	19.43	Primary	2	2	YES	Yes	No	No	11	31.6	Live birth
16082	3	24.22	Secondary	2	2	YES	Yes	Yes	No	13.5	33.9	Live birth
34209	4	20.83	Primary	2	2	YES	Yes	No	No	7.8	25.9	Live birth
32259	6	18.65	Primary	1	2	YES	Yes	No	No	8.5	29	Live birth
34784	5	19.25	Primary	2	2	YES	Yes	No	No	10	32.1	Live birth
33851	2	19.81	Primary	1	2	YES	Yes	No	No	9	32.8	Live birth
36202	1	20.83	Primary	2	2	YES	Yes	No	No	7.8	31	Live birth
38540	3	21.76	Primary	2	2	YES	Yes	Yes	No	10	31.2	Live birth
28206	5	22.43	Secondary	1	2	YES	Yes	No	No	8	27.4	Live birth
37709	3	19.1	Secondary	1	2	YES	Yes	No	No	10	30.2	Live birth
37813	2	21.09	Primary	2	2	YES	Yes	No	No	8.4	35.4	Live birth
32723	3	20.78	Secondary	1	2	YES	Yes	No	No	8.3	31.4	Live birth
27691	1	20.83	Secondary	2	2	YES	Yes	No	No	7	26.9	Live birth
25471	8	20.13	Secondary	2	2	YES	Yes	No	No	9.5	32	Live birth
37089	2	21.48	Secondary	2	2	YES	Yes	No	No	9	26.5	Live birth
34807	2	22.05	Primary	1	2	YES	Yes	No	No	7.5	27.9	Live birth
31457	2	20.17	Secondary	2	2	YES	Yes	No	No	10	22.1	Live birth
31429	1	16.8	Secondary	1	2	YES	Yes	No	No	7	32.1	Live birth
33624	7	27.06	Secondary	2	2	YES	Yes	No	No	9.2	33.8	Live birth
30545	6	23.44	Primary	2	2	YES	Yes	No	No	12.4	30.7	Live birth
37268	2	21.64	Secondary	1	2	YES	Yes	No	No	8	23.3	Live birth
31355	3	17.69	Secondary	2	2	YES	Yes	No	No	8	24.1	Live birth
35446	2	18.37	Primary	2	2	YES	Yes	Yes	No	9	27.1	Live birth
36511	5	18.67	Secondary	2	2	YES	Yes	No	No	8.5	23.3	Live birth
31493	6	19.1	Primary	1	2	YES	Yes	No	No	7.5	26.6	Live birth
36284	3	21.41	Primary	2	2	YES	Yes	No	No	8	28.5	Live birth
31292	4	19.47	Secondary	1	2	YES	Yes	No	No	10.7	30.2	Live birth
33657	2	19.07	Primary	2	2	YES	Yes	No	No	7	31.4	Live birth
36662	2	16.94	Primary	1	2	YES	Yes	No	No	7	28.2	Live birth
38306	4	17.63	Primary	2	2	YES	Yes	Yes	No	8.5	31.8	Live birth
38052	2	18.9	Primary	2	2	YES	Yes	No	No	10.8	29.9	Live birth
36709	1	18.67	Primary	1	2	YES	Yes	Yes	No	9	26.7	Live birth
37037	2	16.94	Secondary	1	2	YES	Yes	No	No	9.2	30.9	Live birth
37226	2	28.13	Secondary	2	2	YES	Yes	No	No	9	30.7	Live birth
32500	2	17.69	Primary	1	2	YES	Yes	No	No	8	25.8	Live birth
33980	1	19.81	Secondary	2	2	YES	Yes	No	No	13	34.1	Live birth
33325	3	24.97	Primary	1	2	YES	Yes	Yes	No	10	29.1	Live birth
33666	3	18.31	Primary	2	2	YES	Yes	No	No	9	33.5	Live birth
35212	1	21.67	Primary	2	2	YES	Yes	No	Yes	9.5	33.2	Live birth
25581	1	18.44	Secondary	2	2	YES	Yes	No	No	10	28.3	Live birth
31591	8	23.83	Secondary	2	2	YES	Yes	No	No	9	28	Live birth
26294	4	22.58	Primary	1	2	YES	Yes	No	Yes	8	29.3	Live birth
39121	3	22.03	Secondary	2	2	YES	Yes	No	No	7.5	25.6	Live birth
37696	5	15.23	Secondary	2	2	YES	Yes	No	No	7	31.2	Live birth
36545	6	20.43	Secondary	2	2	YES	Yes	No	No	8	33.6	Live birth
34237	5	17.58	Primary	1	2	YES	Yes	No	No	11	30.2	Live birth
33634	1	21.48	Secondary	1	2	YES	Yes	No	No	7	30.6	Live birth
33727	7	18.22	Primary	1	2	YES	Yes	No	No	8.4	31.2	Live birth
31396	4	21.83	Primary	1	2	YES	Yes	No	No	8.5	28.4	Live birth
31346	1	22.03	Primary	1	2	YES	Yes	Yes	No	8.5	28.1	Live birth
33042	2	17.93	Secondary	2	2	YES	Yes	No	No	8	30.6	Live birth
33041	3	25.64	Secondary	2	2	YES	Yes	No	No	8.1	26.2	Live birth
31471	2	22.38	Primary	1	2	YES	Yes	No	No	8	31.4	Live birth
34681	1	22.2	Secondary	2	2	YES	Yes	No	No	7.5	26.4	Live birth
34332	6	28.37	Primary	1	2	YES	Yes	No	No	9.2	31.2	Live birth
31289	6	24.46	Secondary	2	2	YES	Yes	No	Yes	7	26.3	Live birth
36636	5	22.04	Primary	2	2	YES	Yes	Yes	No	11	26.1	Live birth
35955	1	18.22	Secondary	2	2	YES	Yes	No	No	8.6	26.8	Live birth
31313	4	26.04	Primary	1	2	YES	Yes	No	No	12.2	28	Live birth
30987	1	21.48	Secondary	2	2	YES	Yes	No	No	8	31.8	Live birth
37151	2	17.69	Secondary	2	2	YES	Yes	No	No	9	35.7	Live birth
28306	1	20.89	Secondary	2	2	YES	Yes	No	No	10	31.5	Live birth
33876	7	15.63	Primary	2	2	YES	Yes	No	No	7.3	27.8	Live birth
30357	2	24.03	Primary	2	2	YES	Yes	No	No	9.8	31.3	Live birth
37131	4	27.34	Secondary	2	2	YES	Yes	No	No	8	29.9	No live birth
24305	2	21.48	Secondary	2	2	YES	Yes	No	No	9.1	23.7	No live birth
27035	1	22.89	Secondary	2	2	YES	Yes	No	No	9.9	31.3	No live birth
31522	9	28.84	Secondary	2	2	YES	Yes	No	No	8	33.9	No live birth
31869	1	20.31	Primary	1	2	YES	Yes	No	No	11	28	No live birth
32122	1	24.44	Secondary	2	2	YES	Yes	No	No	12	26	No live birth
32322	4	24.84	Primary	1	2	YES	Yes	No	No	8	29.3	No live birth
35138	7	18.29	Primary	2	2	YES	Yes	No	No	10	33.9	No live birth
38158	3	22.83	Primary	1	2	YES	Yes	Yes	No	8.5	33.8	No live birth
24664	1	23.44	Secondary	2	2	YES	Yes	No	No	11.2	30.9	No live birth
36182	3	17.58	Primary	1	2	YES	Yes	No	No	8	28.7	No live birth
27738	4	21.1	Secondary	1	2	YES	Yes	No	No	8.2	35.9	No live birth
30377	1	15.63	Primary	2	2	YES	Yes	No	No	9	33.3	No live birth
31658	1	22.86	Secondary	2	2	YES	Yes	No	No	8.8	29.2	No live birth
34306	1	20.96	Primary	1	2	YES	Yes	No	Yes	9	33.6	No live birth
35520	6	31.22	Primary	1	2	YES	Yes	Yes	No	8.5	29.5	No live birth
35742	1	25.53	Secondary	2	2	YES	Yes	No	No	10	34.2	No live birth
38859	6	21.72	Primary	2	2	YES	Yes	Yes	No	9	30.7	No live birth
38061	2	20.31	Primary	2	2	YES	Yes	No	No	8.5	28.4	No live birth
33049	3	17.9	Primary	1	2	YES	Yes	No	No	9	29.1	No live birth
28316	9	21.48	Primary	2	2	YES	Yes	No	No	9	29	No live birth
32147	2	19.2	Secondary	1	2	YES	Yes	No	No	11	29.7	No live birth
34452	4	19.56	Secondary	1	2	YES	Yes	No	No	8	28.6	No live birth
36418	1	17.15	Secondary	1	2	YES	Yes	No	No	7.5	29.6	No live birth
36821	4	24.84	Primary	1	2	YES	Yes	No	No	8.4	28.4	No live birth
38468	1	22.58	Primary	1	2	YES	Yes	No	No	11	28.8	No live birth
38475	5	23.88	Primary	1	2	YES	Yes	No	No	9	33.1	No live birth
26487	5	19.68	Primary	1	2	YES	Yes	No	No	8.2	28.9	No live birth
33636	2	26.04	Primary	2	2	YES	Yes	No	No	8	25.2	No live birth
38758	2	19.05	Primary	2	2	YES	Yes	No	No	11.4	33.6	No live birth
30966	7	23.44	Secondary	2	2	YES	Yes	Yes	No	8.5	32.4	No live birth
32512	2	24.11	Primary	2	2	YES	Yes	No	No	9	27.2	No live birth
39068	8	25.81	Secondary	1	2	YES	Yes	No	No	10	31.4	No live birth
25561	7	18.79	Secondary	2	2	YES	Yes	No	No	8.5	28.6	No live birth
35652	2	23.42	Primary	2	2	YES	Yes	Yes	No	7.5	27.6	No live birth
35048	1	21.76	Secondary	1	2	YES	Yes	No	No	8.5	34.2	No live birth
37269	3	29.02	Primary	1	2	YES	Yes	No	No	9.8	29.2	No live birth
33277	2	23.23	Secondary	2	2	YES	Yes	No	No	8.5	32	No live birth
33935	7	23.53	Secondary	2	2	YES	Yes	No	No	12	34.4	No live birth
38964	3	22.6	Primary	1	2	YES	Yes	No	No	9.5	33.1	No live birth
35801	2	18.83	Secondary	1	2	YES	Yes	No	No	9	33.7	No live birth
34827	1	20.7	Secondary	2	2	YES	Yes	No	No	12.5	27.7	No live birth
33899	3	19.05	Secondary	1	2	YES	Yes	No	No	9	31.5	No live birth
35189	1	17.3	Secondary	1	2	YES	Yes	No	No	9.9	24.5	No live birth
16184	7	23.74	Secondary	2	2	YES	Yes	No	No	8.8	32.6	No live birth
21663	2	19.11	Primary	2	2	YES	Yes	Yes	No	9.5	29.6	No live birth
22006	7	20.03	Secondary	2	2	YES	Yes	No	No	9.9	33.8	No live birth
22341	1	19.1	Primary	2	2	YES	Yes	No	No	7	29.6	No live birth
24974	4	18.83	Secondary	2	2	YES	Yes	No	No	8	34.3	No live birth
25815	2	20.94	Primary	2	2	YES	Yes	No	No	8.8	31.8	No live birth
25997	1	21.36	Secondary	2	2	YES	Yes	No	No	13	31	No live birth
26682	5	19.2	Secondary	2	2	YES	Yes	No	No	10.3	28.5	No live birth
27841	1	20.7	Secondary	1	2	YES	Yes	No	No	7.3	32.9	No live birth
27847	3	20.55	Secondary	2	2	YES	Yes	Yes	No	10	31.7	No live birth
28269	5	26.67	Secondary	2	2	YES	Yes	No	No	11	32.8	No live birth
28371	2	17.26	Primary	2	2	YES	Yes	No	No	9	29.5	No live birth
28778	4	23.05	Primary	2	2	YES	Yes	No	No	9	30.4	No live birth
28888	1	23.01	Secondary	2	2	YES	Yes	No	No	7.5	30.3	No live birth
29942	3	24.77	Secondary	2	2	YES	Yes	No	No	8	30.8	No live birth
30106	3	23.44	Primary	1	2	YES	Yes	Yes	No	9.5	22.9	No live birth
30381	1	22.27	Secondary	1	2	YES	Yes	No	No	7.6	32.5	No live birth
30469	8	23.59	Secondary	2	2	YES	Yes	No	No	8.9	33.8	No live birth
30707	1	23.73	Secondary	2	2	YES	Yes	No	No	8.7	29	No live birth
31019	2	21.76	Primary	2	2	YES	Yes	No	No	12.7	28.7	No live birth
31088	4	17.75	Primary	1	2	YES	Yes	Yes	No	9.4	26.5	No live birth
31372	3	15.24	Secondary	2	2	YES	Yes	No	No	8.7	28.9	No live birth
31506	1	20.03	Secondary	2	2	YES	Yes	Yes	No	9.8	30	No live birth
31531	2	21.48	Secondary	1	2	YES	Yes	Yes	No	9	34	No live birth
31565	1	19.15	Secondary	1	2	YES	Yes	No	No	7.5	34.2	No live birth
31676	7	23.56	Secondary	2	2	YES	Yes	Yes	No	9	32.8	No live birth
31974	3	21.19	Secondary	2	2	YES	Yes	Yes	No	7.4	28.2	No live birth
32120	10	24.34	Primary	2	2	YES	Yes	No	No	8	32.9	No live birth
32384	5	20.32	Primary	1	2	YES	Yes	No	No	8.5	30	No live birth
32409	3	21.23	Primary	2	2	YES	Yes	No	No	8	29.8	No live birth
32582	3	16.89	Secondary	2	2	YES	Yes	No	No	9.1	23.2	No live birth
32656	3	24.24	Secondary	2	2	YES	Yes	No	No	8	35.1	No live birth
32849	3	23.88	Secondary	2	2	YES	Yes	No	No	7.5	35.3	No live birth
32977	2	20.7	Primary	2	2	YES	Yes	No	No	10.2	28.3	No live birth
33056	5	29.67	Primary	1	2	YES	Yes	Yes	No	10	30.1	No live birth
33121	1	18.59	Secondary	2	2	YES	Yes	No	No	10.3	34.7	No live birth
33328	7	24.51	Secondary	1	2	YES	Yes	No	No	7	31.2	No live birth
33374	8	21.78	Secondary	1	2	YES	Yes	No	No	7.8	33.9	No live birth
33406	3	21.21	Secondary	2	2	YES	Yes	No	No	10	31.1	No live birth
33438	3	19.14	Primary	2	2	YES	Yes	Yes	No	7	26.1	No live birth
33485	3	23.23	Secondary	2	2	YES	Yes	No	No	8.8	28.3	No live birth
33699	3	19.98	Secondary	2	2	YES	Yes	No	No	8.1	33	No live birth
33807	2	22.96	Secondary	2	2	YES	Yes	Yes	No	10.6	35	No live birth
34021	2	18.73	Secondary	2	2	YES	Yes	No	No	12.7	25.9	No live birth
34134	4	27.34	Secondary	1	2	YES	Yes	No	No	11	31.7	No live birth
34202	3	18.97	Primary	2	2	YES	Yes	No	No	8.5	28.2	No live birth
34596	1	20.57	Secondary	2	2	YES	Yes	No	No	8	35.3	No live birth
34909	1	20.31	Secondary	2	2	YES	Yes	No	No	8.5	30.6	No live birth
34968	3	26.26	Primary	2	2	YES	Yes	No	No	10.1	28.2	No live birth
35005	2	20.03	Secondary	2	2	YES	Yes	No	No	9	34.3	No live birth
35008	2	20.03	Secondary	2	2	YES	Yes	No	No	8	29.3	No live birth
35056	1	16.97	Secondary	1	2	YES	Yes	No	No	8.5	27.3	No live birth
35067	2	20	Primary	2	2	YES	Yes	No	No	10	30.4	No live birth
35243	5	26.77	Primary	1	2	YES	Yes	No	No	12	30.3	No live birth
35247	2	17.97	Secondary	2	2	YES	Yes	No	No	8.5	35.2	No live birth
35658	6	18.36	Secondary	2	2	YES	Yes	No	No	8	27	No live birth
35881	3	28.13	Primary	2	2	YES	Yes	No	No	7.3	30.1	No live birth
35887	9	19.65	Primary	2	2	YES	Yes	No	No	10	35.7	No live birth
36334	2	22.27	Secondary	1	2	YES	Yes	No	No	8	30.5	No live birth
36440	7	19.96	Secondary	2	2	YES	Yes	No	No	9	29.8	No live birth
36537	3	16.85	Primary	2	2	YES	Yes	No	No	11.8	30.3	No live birth
37067	4	20.44	Secondary	2	2	YES	Yes	No	No	7	31.8	No live birth
37172	2	21.38	Primary	1	2	YES	Yes	No	No	8.5	27.6	No live birth
37304	2	18.92	Secondary	1	2	YES	Yes	No	No	8	23.9	No live birth
37724	3	19.56	Primary	1	2	YES	Yes	No	No	9	23.5	No live birth
37826	2	23.11	Secondary	2	2	YES	Yes	No	No	9	32.1	No live birth
37916	2	27.01	Primary	2	2	YES	Yes	No	No	7	25.5	No live birth
37942	2	21.48	Primary	2	2	YES	Yes	No	No	12	29.1	No live birth
37985	4	19.53	Secondary	1	2	YES	Yes	No	No	10	24.7	No live birth
37987	3	21.36	Secondary	2	2	YES	Yes	No	No	7.5	32.9	No live birth
38230	1	23.23	Secondary	2	2	YES	Yes	No	No	8.5	26.9	No live birth
38287	1	20.4	Secondary	1	2	YES	Yes	No	No	9.5	31.4	No live birth
38325	3	19.11	Primary	2	2	YES	Yes	No	No	9.1	25.2	No live birth
38593	3	21.19	Primary	2	2	YES	Yes	No	No	12	29.7	No live birth
38747	3	18.9	Secondary	2	2	YES	Yes	No	No	11	34.8	No live birth
38866	3	18.73	Primary	2	2	YES	Yes	No	No	8.6	27.4	No live birth
39041	1	20.7	Secondary	1	2	YES	Yes	No	No	9.5	32.5	No live birth
39109	1	23.73	Secondary	2	2	YES	Yes	No	No	9.5	33.9	No live birth
39377	2	21.23	Secondary	1	2	YES	Yes	No	No	7.5	34.9	No live birth
39644	5	28.23	Secondary	2	2	YES	Yes	No	No	8.5	34	No live birth
39961	4	23.6	Primary	1	2	YES	Yes	Yes	No	9.5	30.3	No live birth
8433	2	24.65	Secondary	2	2	YES	Yes	Yes	No	9	35.9	No live birth
10369	3	22.31	Secondary	2	2	YES	Yes	No	No	11.8	27.2	No live birth
18581	7	18.65	Primary	2	2	YES	Yes	No	No	9	33.9	No live birth
21825	3	21.78	Secondary	2	2	YES	Yes	No	No	9	31.7	No live birth
22839	1	23.51	Secondary	2	2	YES	Yes	No	No	10.5	26.9	No live birth
23744	2	21.6	Secondary	2	2	YES	Yes	No	No	9	34.2	No live birth
26895	5	21.78	Primary	2	2	YES	Yes	Yes	No	8.2	31	No live birth
28991	6	21.72	Primary	2	2	YES	Yes	Yes	No	8.2	32.7	No live birth
29197	1	23.23	Secondary	2	2	YES	Yes	No	No	10	25.1	No live birth
29282	2	20.9	Primary	2	2	YES	Yes	No	No	9	28.7	No live birth
29596	2	20.2	Primary	2	2	YES	Yes	No	No	11	31.4	No live birth
29834	7	20.55	Primary	2	2	YES	Yes	No	No	9	27.2	No live birth
29836	6	23.11	Secondary	1	2	YES	Yes	Yes	No	7.9	34.3	No live birth
30147	4	19.14	Primary	2	2	YES	Yes	No	No	12.7	29.5	No live birth
30562	4	19.1	Secondary	2	2	YES	Yes	No	No	10	30.5	No live birth
31280	1	24.61	Secondary	2	2	YES	Yes	No	No	8.5	27.3	No live birth
31331	2	29.3	Secondary	2	2	YES	Yes	No	No	8.1	27.6	No live birth
31410	5	19.53	Secondary	2	2	YES	Yes	No	No	9.5	32.7	No live birth
31632	1	24.84	Secondary	2	2	YES	Yes	No	No	8.2	30.6	No live birth
31856	6	24.84	Secondary	2	2	YES	Yes	No	No	9.9	33.1	No live birth
31884	2	20.31	Primary	1	2	YES	Yes	No	No	8.2	23.8	No live birth
31994	3	22.77	Secondary	2	2	YES	Yes	No	No	10	27.8	No live birth
32045	2	19.14	Secondary	1	2	YES	Yes	Yes	No	7	26.8	No live birth
32136	10	26.37	Secondary	2	2	YES	Yes	Yes	No	11	32.3	No live birth
32218	2	21.08	Secondary	2	2	YES	Yes	No	No	7	22.6	No live birth
32276	1	17.91	Secondary	1	2	YES	Yes	No	No	7.3	23.3	No live birth
33183	1	25	Secondary	1	2	YES	Yes	No	No	8.4	26.2	No live birth
33275	6	27.48	Primary	1	2	YES	Yes	No	No	8	29.2	No live birth
33303	3	19.29	Primary	2	2	YES	Yes	No	No	8	25.3	No live birth
33509	8	17.96	Primary	1	2	YES	Yes	No	Yes	14	26.3	No live birth
33613	6	22.21	Secondary	1	2	YES	Yes	Yes	No	7.5	34.9	No live birth
33794	3	26.56	Primary	1	2	YES	Yes	No	No	10	22.6	No live birth
33970	3	21.5	Primary	1	2	YES	Yes	No	No	12	27.1	No live birth
34142	7	23.92	Primary	1	2	YES	Yes	No	No	13	35.4	No live birth
34167	2	18.83	Secondary	2	2	YES	Yes	No	No	11	32.7	No live birth
34325	5	27.34	Secondary	2	2	YES	Yes	No	No	8	29.8	No live birth
34392	4	26.71	Primary	2	2	YES	Yes	No	No	8.8	29.1	No live birth
34649	3	22.02	Secondary	2	2	YES	Yes	No	No	7.8	32.6	No live birth
35003	1	22.86	Primary	2	2	YES	Yes	No	No	8.2	33	No live birth
35083	5	24.56	Primary	1	2	YES	Yes	No	No	8.5	28.3	No live birth
35551	2	18.82	Secondary	1	2	YES	Yes	No	No	9	26.9	No live birth
35660	10	16.82	Primary	1	2	YES	Yes	No	No	7	30.2	No live birth
35941	5	20	Primary	2	2	YES	Yes	No	No	7	25.3	No live birth
36098	1	24.46	Secondary	1	2	YES	Yes	No	No	10	32.5	No live birth
36248	2	18.43	Secondary	1	2	YES	Yes	No	No	11	28.5	No live birth
36412	6	26.67	Primary	1	2	YES	Yes	No	No	10.1	28.7	No live birth
37254	6	18.65	Primary	2	2	YES	Yes	Yes	No	8	29.6	No live birth
37286	2	25.33	Primary	2	2	YES	Yes	No	No	8.5	35.1	No live birth
37496	3	17.26	Secondary	2	2	YES	Yes	Yes	No	11	30.6	No live birth
37547	5	16.77	Primary	2	2	YES	Yes	No	No	11.6	30	No live birth
37790	2	26.57	Primary	1	2	YES	Yes	No	No	9.5	31.4	No live birth
37820	2	27.06	Secondary	2	2	YES	Yes	No	No	7	31.2	No live birth
38131	5	30.86	Secondary	1	2	YES	Yes	Yes	No	8	25.7	No live birth
38354	3	26.37	Secondary	2	2	YES	Yes	No	No	9.5	29.9	No live birth
38895	4	18.13	Secondary	1	2	YES	Yes	No	No	7.5	29.5	No live birth
35221	3	23.42	Secondary	2	2	No	Yes	No	No	9.5	29.8	Live birth
31729	3	20.94	Primary	2	2	No	Yes	No	No	8	34.2	Live birth
36717	2	24.44	Secondary	2	2	No	Yes	No	No	8	32.8	Live birth
31139	6	19.83	Primary	1	2	No	Yes	No	No	9.3	27.2	Live birth
30040	1	18.96	Secondary	2	2	No	Yes	No	No	10	34	Live birth
31421	2	18.97	Primary	2	2	No	Yes	No	No	8.5	28.9	Live birth
38065	2	29.52	Secondary	1	2	No	Yes	Yes	No	9	32.3	Live birth
37025	2	23.88	Secondary	2	2	No	Yes	No	No	10.8	30.9	Live birth
32010	4	25	Secondary	2	2	No	Yes	No	No	9	23.9	Live birth
36972	5	22.89	Primary	2	2	No	Yes	No	No	10	25.3	Live birth
32223	2	19.1	Primary	2	2	No	Yes	No	No	7.8	29.3	Live birth
39684	3	21.48	Primary	2	2	No	Yes	No	No	8.5	35.8	Live birth
31487	1	17.26	Primary	1	2	No	Yes	No	No	8.3	27.7	Live birth
37944	4	18.65	Primary	1	2	No	Yes	Yes	No	8.5	28.2	Live birth
37841	4	19.03	Primary	1	2	No	Yes	Yes	No	10	31.5	Live birth
33410	2	20.34	Primary	1	2	No	Yes	No	No	10.2	26.6	Live birth
28235	2	20.31	Primary	2	2	No	Yes	No	No	10.1	32.5	Live birth
33010	4	24.68	Primary	2	2	No	Yes	Yes	No	10.5	30	Live birth
36181	2	18.26	Primary	2	2	No	Yes	Yes	No	11.2	28.8	Live birth
29851	2	21.08	Primary	1	2	No	Yes	No	No	11	32.9	Live birth
38294	1	20.24	Secondary	1	2	No	Yes	No	No	8.5	35.5	Live birth
39031	2	23.34	Primary	2	2	No	Yes	No	No	11	32.3	Live birth
34379	3	17.06	Primary	1	2	No	Yes	No	No	9.7	28.8	Live birth
33200	2	19.38	Primary	1	2	No	Yes	No	No	10.7	25.8	Live birth
31085	2	20.83	Secondary	2	2	No	Yes	Yes	No	7.7	32.6	Live birth
24476	3	32.32	Secondary	2	2	No	Yes	No	No	8	34.4	Live birth
35146	3	22.66	Secondary	1	2	No	Yes	No	No	9	30.5	Live birth
34114	14	21.64	Secondary	1	2	No	Yes	No	No	12	25.5	Live birth
32975	5	23.23	Secondary	2	2	No	Yes	No	No	9.5	32	Live birth
33618	4	23.81	Primary	2	2	No	Yes	No	No	7.9	31.8	Live birth
30676	2	18.37	Primary	2	2	No	Yes	No	No	7.5	28.5	Live birth
32063	1	22.06	Secondary	1	2	No	Yes	No	No	8	29.5	Live birth
35983	1	21.48	Secondary	1	2	No	Yes	No	No	8.5	28.4	Live birth
31636	2	17.72	Primary	2	2	No	Yes	No	No	9.4	27.6	Live birth
35906	2	15.02	Primary	2	2	No	Yes	No	No	9	24.5	Live birth
37754	4	25.22	Primary	2	2	No	Yes	Yes	No	9	35.4	Live birth
38543	1	19.53	Primary	2	2	No	Yes	No	No	7	32.9	Live birth
34452	4	19.56	Secondary	2	2	No	Yes	No	No	7.5	29.5	Live birth
34663	2	19.15	Secondary	2	2	No	Yes	No	No	9.5	34	Live birth
37524	4	26.22	Secondary	1	2	No	Yes	Yes	No	10.1	28.4	Live birth
35243	5	26.77	Primary	2	2	No	Yes	No	No	12	30.4	Live birth
32973	2	21.94	Primary	2	2	No	Yes	No	No	9.5	30.9	Live birth
28194	7	22.04	Secondary	2	2	No	Yes	No	No	9	31	Live birth
33154	3	20.44	Secondary	2	2	No	Yes	No	No	9	22.2	Live birth
38035	3	18.59	Secondary	1	2	No	Yes	Yes	No	10	29.7	Live birth
33355	1	20.55	Secondary	1	2	No	Yes	No	No	7.9	27.6	Live birth
36175	1	19.95	Primary	1	2	No	Yes	No	Yes	11	32.4	Live birth
37758	3	20.31	Primary	2	2	No	Yes	No	No	9	33.5	Live birth
32811	1	24.44	Secondary	2	2	No	Yes	No	No	9.8	33.8	Live birth
38191	3	24.61	Primary	2	2	No	Yes	No	No	11	30	Live birth
34003	1	23.05	Primary	1	2	No	Yes	No	No	8	33.3	Live birth
32143	1	25.24	Secondary	2	2	No	Yes	No	No	7.5	35.6	Live birth
36881	1	19.53	Secondary	2	2	No	Yes	No	No	10	35.8	Live birth
36252	4	20.2	Primary	2	2	No	Yes	Yes	No	8.9	28	Live birth
32382	5	23.14	Primary	2	2	No	Yes	No	No	7.8	26.6	Live birth
37835	3	26.67	Primary	2	2	No	Yes	Yes	No	9	34.7	Live birth
30904	3	20.03	Primary	1	2	No	Yes	No	No	10.5	31.9	Live birth
36723	6	19.92	Primary	1	2	No	Yes	Yes	No	7.3	30.4	Live birth
30726	7	23.42	Secondary	2	2	No	Yes	No	No	8.2	32.7	Live birth
32148	1	22.31	Primary	1	2	No	Yes	No	No	7.3	30.5	Live birth
36208	4	25.71	Primary	2	2	No	Yes	No	No	7.5	24.7	Live birth
38097	1	27.55	Primary	2	2	No	Yes	No	No	9	27.1	Live birth
32056	1	21.76	Secondary	2	2	No	Yes	No	No	7.5	33.2	Live birth
37508	2	24.03	Secondary	2	2	No	Yes	No	No	8.7	34	Live birth
35452	2	20.13	Primary	2	2	No	Yes	No	No	9	28.9	Live birth
31874	1	24.34	Secondary	1	2	No	Yes	Yes	No	10	34.1	Live birth
28098	5	18.37	Primary	2	2	No	Yes	Yes	No	8	28.1	Live birth
38301	2	20.96	Secondary	2	2	No	Yes	No	No	7.3	25.7	Live birth
30936	2	20.2	Secondary	2	2	No	Yes	No	No	7	29.8	Live birth
36098	1	24.46	Secondary	2	2	No	Yes	No	No	8	32.9	Live birth
11504	2	22.73	Secondary	2	2	No	Yes	No	No	9.5	32.4	Live birth
31516	1	20.08	Secondary	2	2	No	Yes	No	No	7.5	30.7	Live birth
33754	3	20.5	Secondary	1	2	No	Yes	No	No	9.2	25.8	Live birth
33438	3	19.14	Primary	1	2	No	Yes	Yes	No	8.7	26.2	Live birth
37853	2	17.58	Secondary	2	2	No	Yes	No	No	7.5	28.3	Live birth
30137	5	19.95	Primary	2	2	No	Yes	Yes	No	8.4	26	Live birth
32782	2	24.14	Secondary	2	2	No	Yes	No	No	10.1	35.1	Live birth
31853	1	22.27	Secondary	1	2	No	Yes	No	No	10	27.3	Live birth
26136	1	24.84	Secondary	2	2	No	Yes	No	No	7.5	30.1	Live birth
31426	1	20.83	Primary	2	2	No	Yes	No	No	12.4	29.1	Live birth
36120	2	18.37	Primary	2	2	No	Yes	No	No	8.5	26	Live birth
29059	4	26.49	Secondary	2	2	No	Yes	Yes	No	9	31.3	Live birth
37355	3	21.48	Secondary	1	2	No	Yes	Yes	No	8.5	26.2	Live birth
33889	1	23.31	Secondary	2	2	No	Yes	Yes	No	8	28.7	Live birth
30234	1	21.23	Secondary	1	2	No	Yes	No	No	9	28.3	Live birth
33847	1	23.62	Secondary	2	2	No	Yes	Yes	No	9.1	32.2	Live birth
33495	3	24.14	Secondary	1	2	No	Yes	No	No	10	28.3	Live birth
37623	1	22.04	Secondary	2	2	No	Yes	No	No	8.5	32.9	Live birth
33758	13	25.34	Secondary	2	2	No	Yes	No	No	8.7	35.6	Live birth
33102	6	21.23	Primary	2	2	No	Yes	No	No	8	25.4	Live birth
29927	1	18.52	Primary	1	2	No	Yes	No	No	11.8	27.2	Live birth
33991	6	26.56	Primary	1	2	No	Yes	Yes	No	10	31	Live birth
32344	4	21.64	Primary	2	2	No	Yes	No	No	9	23.6	Live birth
37439	5	19.65	Primary	1	2	No	Yes	No	No	10	33.1	Live birth
35358	1	19.92	Secondary	2	2	No	Yes	No	No	10.5	25	Live birth
30802	2	20.81	Secondary	1	2	No	Yes	No	No	10.5	33.8	Live birth
32323	3	22.03	Secondary	2	2	No	Yes	No	No	11.6	31	Live birth
35339	2	20.03	Secondary	2	2	No	Yes	No	No	8	28	Live birth
26716	2	17.71	Secondary	2	2	No	Yes	No	No	10	32.9	Live birth
33703	2	26.35	Primary	2	2	No	Yes	No	No	12	27.6	Live birth
36377	3	22.89	Primary	2	2	No	Yes	No	No	8.5	28.4	Live birth
21194	3	22.58	Secondary	2	2	No	Yes	No	No	9	30.5	Live birth
33905	1	18.37	Secondary	1	2	No	Yes	No	No	11	32.6	Live birth
32488	4	20.89	Secondary	1	2	No	Yes	No	No	7.7	35.1	Live birth
27897	1	19.33	Secondary	1	2	No	Yes	No	No	9	32	Live birth
33097	4	21.91	Primary	2	2	No	Yes	No	No	11.2	30.4	Live birth
36281	4	20.7	Secondary	2	2	No	Yes	No	No	9.5	32	Live birth
29266	3	25.71	Primary	1	2	No	Yes	No	No	8.5	30.8	Live birth
31955	4	17.3	Primary	2	2	No	Yes	Yes	No	8.4	32.5	Live birth
39339	3	22.89	Secondary	2	2	No	Yes	No	No	8.5	33.9	Live birth
33127	1	19.47	Secondary	1	2	No	Yes	No	No	8	30.8	Live birth
37801	1	18.83	Primary	1	2	No	Yes	No	No	8.5	31.7	Live birth
38955	3	18.49	Primary	1	2	No	Yes	No	No	8	29.5	Live birth
34971	2	23.51	Primary	2	2	No	Yes	No	No	8.8	29.1	Live birth
34859	1	17.47	Primary	2	2	No	Yes	No	No	8.5	25.5	Live birth
34070	6	21.88	Primary	2	2	No	Yes	No	No	11	25.5	Live birth
32580	2	22.22	Secondary	2	2	No	Yes	Yes	No	9.8	31.4	Live birth
18135	3	20.06	Secondary	2	2	No	Yes	No	No	z	35.1	No live birth
27486	2	16.61	Secondary	2	2	No	Yes	No	No	8	24.5	No live birth
27654	2	20.28	Primary	2	2	No	Yes	No	No	8	28.5	No live birth
28375	6	21.09	Secondary	2	2	No	Yes	No	No	13	30.9	No live birth
28730	14	25.3	Primary	2	2	No	Yes	No	No	9.2	34.4	No live birth
28890	1	21.09	Secondary	2	2	No	Yes	No	No	7.5	25.7	No live birth
28892	8	24.67	Primary	2	2	No	Yes	No	No	7	32.7	No live birth
28965	5	19.48	Secondary	2	2	No	Yes	No	No	8.7	33.2	No live birth
29143	3	19.43	Primary	1	2	No	Yes	Yes	No	8.5	25.8	No live birth
29622	2	20.55	Primary	2	2	No	Yes	No	No	8	27.1	No live birth
30007	2	18.04	Primary	1	2	No	Yes	No	No	8.5	32.9	No live birth
30082	4	28.98	Secondary	2	2	No	Yes	No	No	9	30.9	No live birth
30208	3	22.55	Secondary	2	2	No	Yes	No	No	8	31.3	No live birth
30217	4	24.44	Primary	2	2	No	Yes	No	No	8.5	32.3	No live birth
30238	2	20.03	Secondary	2	2	No	Yes	No	No	10.3	31.1	No live birth
30538	5	18.36	Secondary	2	2	No	Yes	No	No	7.5	25.6	No live birth
30649	6	25.71	Primary	2	2	No	Yes	No	No	7	24.7	No live birth
30732	3	22.6	Primary	2	2	No	Yes	No	No	8.6	32	No live birth
30819	5	23.83	Primary	2	2	No	Yes	No	No	11	25.7	No live birth
30844	2	29.82	Primary	2	2	No	Yes	No	No	10	34.8	No live birth
30954	4	19.72	Primary	2	2	No	Yes	No	No	8.3	30.7	No live birth
30966	7	23.44	Primary	1	2	No	Yes	Yes	No	8.2	32.3	No live birth
31028	2	26.84	Secondary	2	2	No	Yes	Yes	No	8	29.1	No live birth
31329	5	26.56	Primary	2	2	No	Yes	Yes	No	10	26.3	No live birth
31381	3	26.78	Secondary	1	2	No	Yes	No	No	9	34.1	No live birth
31395	6	17.92	Primary	2	2	No	Yes	No	No	8	30.1	No live birth
31503	2	18.36	Secondary	2	2	No	Yes	No	No	10	29	No live birth
31514	1	20.57	Secondary	2	2	No	Yes	No	No	9.1	23.9	No live birth
31650	2	19.63	Secondary	2	2	No	Yes	No	No	9	29.3	No live birth
31926	5	20.5	Primary	1	2	No	Yes	No	No	9.3	24.7	No live birth
32092	3	30.86	Primary	2	2	No	Yes	No	No	9	27.7	No live birth
32132	3	20.43	Primary	1	2	No	Yes	Yes	No	11.1	29.1	No live birth
32144	5	17.58	Secondary	2	2	No	Yes	No	No	10.6	31.4	No live birth
32421	4	26.17	Secondary	1	2	No	Yes	No	No	8	28.1	No live birth
32527	1	23.44	Secondary	2	2	No	Yes	No	No	8.8	30.9	No live birth
32620	1	22.89	Secondary	2	2	No	Yes	No	No	9.4	34.9	No live birth
32729	5	25.46	Primary	2	2	No	Yes	Yes	No	7	28	No live birth
32737	3	19.2	Primary	1	2	No	Yes	Yes	No	9	25.8	No live birth
32749	1	18.36	Secondary	2	2	No	Yes	No	No	9	30.5	No live birth
32873	4	21.78	Primary	1	2	No	Yes	No	No	13.4	25.5	No live birth
32927	3	25.91	Secondary	2	2	No	Yes	Yes	No	9.2	32.1	No live birth
32953	3	25.39	Secondary	2	2	No	Yes	No	No	8.5	34.6	No live birth
33005	2	20.57	Primary	1	2	No	Yes	No	No	10	32.2	No live birth
33085	2	22.77	Secondary	2	2	No	Yes	No	No	9.1	31.7	No live birth
33251	3	20.28	Primary	1	2	No	Yes	No	No	8.2	27.8	No live birth
33332	7	23.23	Primary	1	2	No	Yes	No	No	8	30.6	No live birth
33360	2	23.63	Secondary	2	2	No	Yes	No	No	7.3	31.6	No live birth
33366	1	20.96	Primary	1	2	No	Yes	No	No	8.5	22.5	No live birth
33371	6	22.6	Primary	1	2	No	Yes	No	No	8.7	34	No live birth
33386	1	22.05	Secondary	2	2	No	Yes	No	No	9.1	34.8	No live birth
33513	6	22.83	Primary	1	2	No	Yes	No	No	13	26.8	No live birth
33659	5	17.19	Primary	2	2	No	Yes	Yes	No	10.3	26.3	No live birth
33707	1	20.06	Secondary	2	2	No	Yes	No	No	7.5	30.2	No live birth
33710	4	24.65	Secondary	1	2	No	Yes	Yes	No	12	30.3	No live birth
33744	1	20.7	Secondary	1	2	No	Yes	No	No	8.5	35.8	No live birth
34285	3	26.67	Primary	2	2	No	Yes	No	No	7	29.2	No live birth
34514	3	18.83	Secondary	2	2	No	Yes	No	No	9.5	34.5	No live birth
34588	7	24.97	Primary	2	2	No	Yes	Yes	No	8.9	29.7	No live birth
34607	1	25.39	Secondary	1	2	No	Yes	No	No	9	35.4	No live birth
34623	5	21.88	Primary	2	2	No	Yes	No	No	10.8	30.9	No live birth
34643	2	23.83	Primary	2	2	No	Yes	No	No	12	28.2	No live birth
34687	1	20.69	Secondary	2	2	No	Yes	No	No	7	35.8	No live birth
34705	5	30.12	Primary	2	2	No	Yes	Yes	No	11	29.9	No live birth
34929	4	18.82	Secondary	1	2	No	Yes	No	No	8	31	No live birth
35100	2	18.83	Secondary	2	2	No	Yes	No	No	8.3	30.5	No live birth
35160	1	22.48	Secondary	2	2	No	Yes	No	No	8.6	28.2	No live birth
35349	4	23.23	Secondary	2	2	No	Yes	No	No	9.6	35.5	No live birth
35438	4	22.58	Primary	1	2	No	Yes	No	No	8.5	28.8	No live birth
35474	3	21.09	Secondary	2	2	No	Yes	No	No	8.8	25.2	No live birth
35476	5	21.55	Primary	1	2	No	Yes	No	No	8.5	30.2	No live birth
35533	3	22.21	Primary	1	2	No	Yes	No	No	9.4	28.1	No live birth
35537	1	25.64	Secondary	2	2	No	Yes	No	No	7.5	27.2	No live birth
35539	1	23.53	Secondary	1	2	No	Yes	No	No	7.3	33.8	No live birth
35603	1	17.78	Secondary	2	2	No	Yes	No	No	9	34.7	No live birth
35607	1	20.96	Secondary	2	2	No	Yes	No	No	7	25.9	No live birth
35708	4	18.82	Secondary	1	2	No	Yes	Yes	No	9.3	27.5	No live birth
35812	3	18.36	Primary	2	2	No	Yes	No	No	10	33.4	No live birth
35814	3	21.48	Secondary	1	2	No	Yes	No	No	11	33.3	No live birth
35854	1	28.04	Primary	1	2	No	Yes	No	No	9	27.1	No live birth
35920	7	25.81	Primary	1	2	No	Yes	No	No	9.5	28.6	No live birth
36107	2	17.97	Secondary	2	2	No	Yes	No	Yes	7	35.4	No live birth
36135	1	20.03	Secondary	2	2	No	Yes	No	No	7.6	32	No live birth
36148	3	18.29	Primary	2	2	No	Yes	No	No	8.2	28	No live birth
36268	7	17.31	Secondary	2	2	No	Yes	No	No	8.1	26.4	No live birth
36346	3	18.37	Primary	2	2	No	Yes	No	No	9.6	26.4	No live birth
36386	2	20.2	Secondary	2	2	No	Yes	Yes	No	7	32.4	No live birth
36449	6	26.04	Primary	2	2	No	Yes	No	No	9.5	31	No live birth
36613	1	23.62	Secondary	2	2	No	Yes	No	No	9	25.9	No live birth
36625	3	24.22	Primary	1	2	No	Yes	No	No	10	25.5	No live birth
36695	1	18.36	Secondary	2	2	No	Yes	No	No	9.5	35.1	No live birth
36778	2	23.23	Secondary	2	2	No	Yes	No	No	9	28.2	No live birth
36934	4	18.75	Secondary	1	2	No	Yes	No	No	9	34	No live birth
36986	3	17.01	Primary	2	2	No	Yes	No	No	9	35.2	No live birth
37172	2	21.38	Primary	2	2	No	Yes	No	No	15	27.7	No live birth
37174	3	20.81	Primary	1	2	No	Yes	No	No	9.5	31.9	No live birth
37219	1	28.13	Secondary	1	2	No	Yes	No	No	8.8	23.9	No live birth
37223	3	23.63	Primary	2	2	No	Yes	No	No	11	26.3	No live birth
37414	4	20.31	Primary	1	2	No	Yes	No	No	12	27	No live birth
37431	3	23.92	Secondary	2	2	No	Yes	No	No	7.5	35.3	No live birth
37487	2	21.88	Secondary	2	2	No	Yes	No	No	7.5	33.5	No live birth
37490	4	25.08	Primary	1	2	No	Yes	No	No	9	30.6	No live birth
37542	1	26.35	Primary	1	2	No	Yes	No	No	11	32	No live birth
37663	5	22.03	Secondary	2	2	No	Yes	No	No	9	30.8	No live birth
37665	2	24.65	Secondary	2	2	No	Yes	No	No	9.5	29.7	No live birth
37857	4	21.88	Secondary	1	2	No	Yes	No	No	9	35.8	No live birth
38024	12	22.27	Secondary	2	2	No	Yes	No	No	8.5	35.2	No live birth
38142	6	24.35	Primary	1	2	No	Yes	No	No	9.4	24.9	No live birth
38288	2	19.29	Primary	1	2	No	Yes	No	No	10.7	28.7	No live birth
38316	1	24.44	Secondary	2	2	No	Yes	No	No	11.9	33.6	No live birth
38331	1	18.36	Secondary	2	2	No	Yes	No	No	8.5	31	No live birth
38564	5	17.63	Primary	2	2	No	Yes	No	No	9	35.6	No live birth
38644	3	25.46	Primary	2	2	No	Yes	No	No	9.5	33.5	No live birth
38698	1	21.48	Secondary	1	2	No	Yes	No	No	8.4	24.2	No live birth
38725	4	21.48	Primary	2	2	No	Yes	No	No	8.5	26.8	No live birth
38835	4	24.13	Primary	1	2	No	Yes	Yes	No	9.5	32.6	No live birth
38926	1	25.39	Primary	1	2	No	Yes	No	No	7.2	25.9	No live birth
39285	3	25.86	Primary	2	2	No	Yes	Yes	No	8	29.7	No live birth
39570	3	21.76	Primary	1	2	No	Yes	No	No	7.5	31	No live birth
39716	8	22.03	Primary	1	2	No	Yes	No	No	7.2	35.6	No live birth
39774	1	19.05	Secondary	2	2	No	Yes	No	No	8.5	28.6	No live birth
39826	3	22.06	Primary	2	2	No	Yes	No	No	7.5	33.3	No live birth
39844	3	24.68	Secondary	2	2	No	Yes	No	No	8.5	24.7	No live birth
39959	3	24.44	Secondary	1	2	No	Yes	Yes	No	9	29.3	No live birth
40023	3	20.94	Primary	1	2	No	Yes	Yes	No	9	32.5	No live birth
29830	1	22.27	Secondary	1	2	YES	No	No	No	10.6	23.9	Live birth
32463	6	17.99	Primary	1	2	YES	No	No	No	7.6	35.5	Live birth
29103	1	16.9	Secondary	1	2	YES	No	No	No	7.5	34.9	Live birth
32950	1	23.03	Secondary	2	2	YES	No	No	No	11	29.2	Live birth
28810	6	21.48	Primary	1	2	YES	No	No	No	9.3	33.3	Live birth
34220	3	26.04	Primary	2	2	YES	No	No	No	9	25.3	Live birth
30837	1	27.18	Primary	1	2	YES	No	Yes	No	10	26.3	Live birth
31256	1	19.72	Secondary	1	2	YES	No	No	No	9.3	35.5	Live birth
35288	2	19.14	Primary	2	2	YES	No	No	No	9	31.9	Live birth
37896	2	22.03	Secondary	2	2	YES	No	No	No	7	29.6	Live birth
34323	4	22.04	Secondary	2	2	YES	No	No	No	9	33.1	Live birth
38276	2	19.92	Primary	2	2	YES	No	No	No	8.5	24.4	Live birth
29839	4	17.78	Primary	2	2	YES	No	No	No	10	30	Live birth
27360	5	17.69	Secondary	2	2	YES	No	No	No	9	32	Live birth
28656	3	18.96	Primary	1	2	YES	No	No	No	13	27.4	Live birth
30511	3	20.4	Primary	1	2	YES	No	No	No	10.5	29.4	Live birth
34397	5	19.56	Primary	2	2	YES	No	No	No	10	33.5	Live birth
33119	2	22.66	Secondary	2	2	YES	No	Yes	No	8	33	Live birth
33873	8	18.75	Primary	1	2	YES	No	No	No	12	30.9	Live birth
33721	3	19.98	Secondary	1	2	YES	No	No	No	11	33.8	Live birth
27851	1	16.46	Primary	2	2	YES	No	No	No	11	23.4	Live birth
31383	2	22.35	Secondary	1	2	YES	No	No	No	7	33.2	Live birth
36565	3	19.63	Primary	1	2	YES	No	No	No	7	23.2	Live birth
30097	1	26.22	Secondary	2	2	YES	No	No	No	9.9	30.3	Live birth
35228	5	18.29	Primary	1	2	YES	No	No	No	7	26.3	Live birth
33233	3	26.67	Secondary	1	2	YES	No	No	No	9.3	27.3	Live birth
37371	3	17.31	Primary	1	2	YES	No	No	No	9.5	26.6	Live birth
37734	4	20.45	Primary	1	2	YES	No	No	No	12	29.8	Live birth
28492	2	19.98	Secondary	2	2	YES	No	No	No	10	28	Live birth
32197	4	22.31	Primary	1	2	YES	No	Yes	No	10.5	26.7	Live birth
36735	2	18.36	Primary	1	2	YES	No	No	No	9	27.5	Live birth
37989	1	23.51	Secondary	1	2	YES	No	No	No	7	32.1	Live birth
33970	3	21.5	Primary	2	2	YES	No	No	No	13	27.2	Live birth
32033	1	18.82	Primary	1	2	YES	No	No	No	9	31	Live birth
37938	4	28.25	Primary	1	2	YES	No	Yes	No	9	31.5	Live birth
33955	4	19.56	Secondary	2	2	YES	No	No	No	10	24.4	Live birth
34389	4	19.83	Secondary	2	2	YES	No	No	No	8	30.8	Live birth
28843	4	18.96	Secondary	1	2	YES	No	No	No	8	27	Live birth
36461	1	17.04	Secondary	1	2	YES	No	No	No	9	25.4	Live birth
27957	2	16.44	Primary	2	2	YES	No	No	No	8	31.7	Live birth
36233	3	23.88	Primary	1	2	YES	No	Yes	No	10.9	24.3	Live birth
35632	1	18.14	Primary	2	2	YES	No	No	No	10.5	24.5	Live birth
32012	4	19.14	Primary	1	2	YES	No	No	No	8.8	25.1	Live birth
35198	1	16.45	Secondary	2	2	YES	No	No	No	7.6	27.7	Live birth
34940	5	22.27	Secondary	2	2	YES	No	No	No	10.8	31	Live birth
31766	5	20.96	Secondary	2	2	YES	No	No	No	7.2	28	Live birth
36694	1	23.51	Secondary	1	2	YES	No	No	No	8.5	29.5	Live birth
37237	1	21.48	Secondary	1	2	YES	No	No	No	9	23.9	Live birth
35304	1	22.89	Secondary	1	2	YES	No	No	No	10	32.7	Live birth
29272	3	26.56	Primary	2	2	YES	No	No	No	10	31	Live birth
39538	1	23.59	Primary	1	2	YES	No	Yes	No	8	33	Live birth
37554	1	22.27	Secondary	1	2	YES	No	No	No	9	32.3	Live birth
33281	1	22.89	Secondary	2	2	YES	No	No	No	7.5	31.7	Live birth
37233	1	26.62	Primary	1	2	YES	No	Yes	No	11	21.8	Live birth
35263	3	19.81	Secondary	1	2	YES	No	No	No	7	31.5	Live birth
36637	4	19.92	Primary	1	2	YES	No	No	No	10	30.3	Live birth
22451	2	16.02	Secondary	2	2	YES	No	No	No	7.3	25.6	Live birth
35200	5	21.08	Secondary	2	2	YES	No	No	No	9.6	33.3	Live birth
23261	1	19.47	Secondary	2	2	YES	No	No	No	7.5	25.5	Live birth
36991	7	22.64	Primary	2	2	YES	No	Yes	No	7.5	34.4	Live birth
37719	4	21.33	Secondary	2	2	YES	No	No	No	7	30.8	Live birth
30015	1	21.09	Secondary	2	2	YES	No	No	No	9.7	25.7	Live birth
31908	3	21.23	Secondary	2	2	YES	No	No	No	7.8	32.5	Live birth
39675	2	28.04	Secondary	1	2	YES	No	No	No	7	23.1	Live birth
23232	2	23.44	Secondary	2	2	YES	No	No	No	12	26.8	Live birth
29585	4	20.08	Secondary	1	2	YES	No	No	No	7	27	Live birth
21844	5	26.04	Secondary	2	2	YES	No	No	No	7.4	34.9	Live birth
39596	1	18.66	Secondary	2	2	YES	No	No	No	7.5	28.8	Live birth
36483	4	18.49	Primary	2	2	YES	No	No	No	8.2	32.1	Live birth
28905	1	26.08	Secondary	2	2	YES	No	No	No	11	32.8	Live birth
21391	5	19.83	Secondary	2	2	YES	No	No	No	9.1	31.4	Live birth
31162	1	20.08	Secondary	1	2	YES	No	No	No	10.6	23.3	Live birth
34891	1	23.15	Secondary	1	2	YES	No	No	No	8.9	32.4	Live birth
31261	2	20.7	Secondary	1	2	YES	No	No	No	7.5	32.5	Live birth
29214	1	18.59	Secondary	2	2	YES	No	No	No	8	31.9	Live birth
38443	2	21.23	Primary	1	2	YES	No	No	No	11	30.7	Live birth
36112	2	18.43	Primary	1	2	YES	No	Yes	No	11	31.6	Live birth
36126	1	20.28	Secondary	1	2	YES	No	No	No	9.5	29	Live birth
35317	4	24.78	Primary	1	2	YES	No	No	No	10	32.1	Live birth
32226	2	22.89	Secondary	2	2	YES	No	No	No	8	29.4	Live birth
16371	2	23.15	Secondary	2	2	YES	No	No	Yes	8.5	32	Live birth
34563	5	20.08	Primary	1	2	YES	No	No	No	9.2	32.3	Live birth
23776	3	16.33	Secondary	2	2	YES	No	No	No	10	31.7	Live birth
35192	2	23.63	Primary	1	2	YES	No	Yes	No	12.5	27.2	Live birth
37063	5	20.94	Primary	1	2	YES	No	Yes	No	7.5	32.7	Live birth
28112	1	21.09	Secondary	2	2	YES	No	No	No	7	34.6	Live birth
33454	3	22.49	Secondary	2	2	YES	No	No	No	8	24.3	Live birth
34353	1	18.73	Secondary	2	2	YES	No	No	No	8.5	30.7	Live birth
32646	4	23.44	Primary	2	2	YES	No	No	No	11	31.1	Live birth
37875	3	21.26	Primary	1	2	YES	No	No	No	7	21.9	Live birth
38652	1	21.36	Secondary	2	2	YES	No	No	No	8.3	25	Live birth
23596	4	17.31	Primary	1	2	YES	No	No	No	10.7	30.9	Live birth
33853	2	27.64	Primary	1	2	YES	No	No	No	12	27.1	Live birth
35436	4	26.04	Primary	1	2	YES	No	No	No	10	31.2	Live birth
37325	4	20.32	Secondary	1	2	YES	No	No	No	8	23.8	Live birth
25925	1	21.06	Secondary	2	2	YES	No	No	No	7	35	Live birth
29882	2	26.03	Secondary	1	2	YES	No	No	No	9	27.5	Live birth
37950	3	20.03	Secondary	1	2	YES	No	No	Yes	9	29	Live birth
28646	2	19.23	Secondary	2	2	YES	No	No	No	9	31.2	Live birth
38433	5	28.76	Primary	2	2	YES	No	No	No	7	26.8	Live birth
28876	3	21.79	Primary	2	2	YES	No	No	No	9	30.5	Live birth
29003	2	19.95	Primary	2	2	YES	No	No	Yes	15	30.9	Live birth
31402	4	19.98	Secondary	1	2	YES	No	No	No	13.1	29.9	Live birth
25748	1	19.63	Primary	2	2	YES	No	No	No	9	35.1	Live birth
32984	1	24.67	Primary	1	2	YES	No	No	No	9.5	29.4	Live birth
37762	4	21.78	Primary	1	2	YES	No	No	No	8	30.8	Live birth
38416	1	18.03	Secondary	2	2	YES	No	No	No	10	32	Live birth
34287	4	18.73	Primary	1	2	YES	No	No	No	9.4	29.4	Live birth
33922	5	20.96	Primary	1	2	YES	No	No	No	7	27.3	Live birth
30028	1	20.81	Secondary	1	2	YES	No	No	No	11	29.2	Live birth
30214	3	23.23	Primary	2	2	YES	No	No	No	9	31.6	Live birth
36999	1	21.64	Secondary	1	2	YES	No	No	No	8	31.7	Live birth
36018	1	21.77	Primary	1	2	YES	No	No	No	7.5	23.2	Live birth
29931	6	22.22	Secondary	1	2	YES	No	No	No	7.2	26.9	Live birth
32342	2	23.44	Secondary	2	2	YES	No	No	No	9.3	26.8	Live birth
32102	2	22.03	Secondary	2	2	YES	No	No	No	7	32.9	Live birth
30920	3	17.85	Primary	1	2	YES	No	Yes	No	11.1	28.7	Live birth
30997	1	21.23	Primary	1	2	YES	No	Yes	No	8.1	27.8	Live birth
35965	3	28.69	Primary	1	2	YES	No	No	No	9	28.2	Live birth
29825	3	22.21	Primary	2	2	YES	No	No	No	11	28.2	Live birth
37113	10	25.81	Primary	1	2	YES	No	Yes	No	7	26.6	Live birth
35412	3	26.5	Primary	1	2	YES	No	No	No	9.5	33.6	Live birth
30748	9	23.44	Primary	1	2	YES	No	Yes	No	8.5	30.1	Live birth
33275	6	27.48	Primary	2	2	YES	No	No	No	9.5	30.2	Live birth
27236	3	24.31	Primary	1	2	YES	No	Yes	No	10.3	30.6	Live birth
34341	3	17.97	Secondary	2	2	YES	No	No	No	10	30.3	Live birth
28281	1	20.2	Secondary	2	2	YES	No	No	No	8.2	33.8	Live birth
35408	3	17.15	Secondary	1	2	YES	No	No	No	8.5	33	Live birth
29039	4	24.77	Primary	1	2	YES	No	No	No	7	32.4	Live birth
9814	1	20.45	Secondary	2	2	YES	No	No	No	9	33.1	Live birth
38960	3	20	Primary	1	2	YES	No	Yes	No	12.8	24.4	Live birth
39212	1	16.59	Secondary	1	2	YES	No	No	No	7.5	32.9	Live birth
10528	2	19.14	Secondary	2	2	YES	No	No	No	12	26.9	Live birth
30681	6	19.78	Secondary	1	2	YES	No	No	No	7	34.9	Live birth
27784	1	21.67	Secondary	1	2	YES	No	No	No	9.6	29.5	Live birth
29676	2	17.63	Primary	1	2	YES	No	No	No	7.5	32	Live birth
29988	1	20.2	Secondary	1	2	YES	No	No	No	9.2	33.9	Live birth
35377	1	24.46	Primary	1	2	YES	No	No	No	11.3	26.2	Live birth
37049	2	22.38	Secondary	1	2	YES	No	No	No	8	34.7	Live birth
17135	1	20.03	Secondary	1	2	YES	No	No	No	10.1	26.5	Live birth
30644	3	20.06	Primary	2	2	YES	No	No	No	8.5	31	Live birth
39276	4	20.7	Primary	2	2	YES	No	No	No	8	30.6	Live birth
39036	10	16.94	Primary	1	2	YES	No	No	No	8	30	Live birth
37397	2	26.17	Secondary	1	2	YES	No	No	No	9.5	30.7	Live birth
30730	2	20.94	Primary	2	2	YES	No	Yes	No	10	31.9	Live birth
33448	2	17.31	Primary	2	2	YES	No	No	Yes	9.8	34.7	Live birth
33591	1	19.78	Secondary	2	2	YES	No	No	No	9	32.9	Live birth
35040	1	18.75	Secondary	2	2	YES	No	No	No	8	30.1	Live birth
6897	6	25.24	Secondary	1	2	YES	No	Yes	No	14	33.8	Live birth
36887	2	18	Primary	1	2	YES	No	Yes	No	8	29.6	Live birth
33397	3	19.56	Secondary	2	2	YES	No	No	No	7	33.4	Live birth
34348	1	19.81	Secondary	2	2	YES	No	Yes	No	8	33.7	Live birth
31184	1	22.6	Secondary	1	2	YES	No	No	No	8.8	27	Live birth
31820	10	24.14	Primary	1	2	YES	No	No	No	12.2	33.7	Live birth
37275	4	24.56	Primary	1	2	YES	No	Yes	No	10.4	27.6	Live birth
31948	10	20.81	Primary	2	2	YES	No	No	No	7.2	34.4	Live birth
32139	1	19.29	Secondary	1	2	YES	No	No	No	9	35.2	Live birth
27971	10	20.4	Secondary	2	2	YES	No	No	No	13	35.3	Live birth
36619	3	24.61	Primary	2	2	YES	No	Yes	No	9.1	30.1	Live birth
30267	6	21.93	Primary	1	2	YES	No	No	No	9	34.9	Live birth
35038	6	19.02	Primary	1	2	YES	No	No	No	8	28.4	Live birth
21097	4	24.46	Secondary	2	2	YES	No	No	No	8.5	34.6	Live birth
30060	2	22.04	Primary	2	2	YES	No	No	No	8	29.4	Live birth
27225	7	21.46	Secondary	2	2	YES	No	No	No	10	28.7	Live birth
31536	3	26.04	Primary	1	2	YES	No	No	No	8.8	31.5	Live birth
37884	5	19.4	Secondary	2	2	YES	No	No	No	8.5	32.5	Live birth
36083	2	23.05	Primary	1	2	YES	No	Yes	No	7	27.9	Live birth
33392	2	21.26	Primary	1	2	YES	No	No	No	7	29.3	Live birth
29357	1	23.83	Secondary	1	2	YES	No	No	No	8	26.6	Live birth
19287	1	17.97	Secondary	2	2	YES	No	Yes	No	9	31.4	Live birth
36321	2	24.22	Secondary	1	2	YES	No	No	No	8.5	24.8	Live birth
33674	7	18.67	Primary	1	2	YES	No	No	No	11	29.1	Live birth
31556	2	19.82	Primary	1	2	YES	No	Yes	No	9	30.6	Live birth
30868	3	19.49	Primary	1	2	YES	No	No	No	8	28.1	Live birth
34109	2	21.48	Primary	2	2	YES	No	No	No	10	35.7	Live birth
39454	5	27.83	Secondary	1	2	YES	No	No	No	14	23	Live birth
28789	3	17.9	Primary	2	2	YES	No	No	No	10.3	30.1	Live birth
31404	1	25.2	Primary	2	2	YES	No	Yes	No	8.1	26.2	Live birth
36361	1	20.31	Secondary	2	2	YES	No	No	No	9	34.9	Live birth
31565	1	19.15	Secondary	2	2	YES	No	No	No	7	34.3	Live birth
40001	1	21.22	Secondary	1	2	YES	No	Yes	No	8	29.4	Live birth
29390	2	23.94	Primary	2	2	YES	No	No	No	8.7	31.3	Live birth
37680	5	22.2	Primary	1	2	YES	No	No	No	8.5	27.7	Live birth
28114	1	20.76	Secondary	2	2	YES	No	No	No	8.4	34.3	Live birth
39364	1	17.48	Secondary	1	2	YES	No	No	No	14.1	33.4	Live birth
30603	8	22.31	Primary	1	2	YES	No	No	No	9	35.2	Live birth
34183	1	22.31	Secondary	2	2	YES	No	No	No	7	32.2	Live birth
8657	10	25.97	Primary	2	2	YES	No	No	No	7.1	35.4	No live birth
9093	1	18.43	Secondary	2	2	YES	No	No	No	8	35.4	No live birth
10543	3	17.69	Secondary	2	2	YES	No	No	No	9.6	27.1	No live birth
13927	1	17.97	Secondary	2	2	YES	No	No	No	8.2	28.2	No live birth
16102	2	19.63	Secondary	2	2	YES	No	No	No	7.5	30.9	No live birth
19585	1	17.57	Secondary	2	2	YES	No	No	No	9	34.4	No live birth
21046	1	22.43	Secondary	2	2	YES	No	No	No	9.3	34.6	No live birth
21104	2	23.44	Secondary	2	2	YES	No	No	No	8.5	30.5	No live birth
22948	1	20.83	Secondary	2	2	YES	No	No	No	7	31	No live birth
23332	8	17.09	Secondary	2	2	YES	No	No	No	12	29.3	No live birth
24838	1	21.33	Secondary	2	2	YES	No	No	No	11	28	No live birth
27478	1	30.82	Secondary	2	2	YES	No	Yes	No	7.5	27.4	No live birth
27779	3	26.03	Secondary	1	2	YES	No	No	No	8	31.6	No live birth
28052	1	19.56	Secondary	2	2	YES	No	Yes	No	12.1	26.3	No live birth
28235	2	20.31	Primary	1	2	YES	No	No	No	9.9	32.2	No live birth
28482	5	19.57	Secondary	2	2	YES	No	No	No	8.5	32.2	No live birth
28536	6	21.5	Secondary	2	2	YES	No	No	No	7	30.9	No live birth
28670	3	25.39	Secondary	2	2	YES	No	No	No	9	35.6	No live birth
28917	2	18.73	Primary	2	2	YES	No	Yes	No	9.3	24.9	No live birth
29071	3	24.44	Primary	1	2	YES	No	No	No	9.3	28.5	No live birth
29488	4	29.14	Secondary	2	2	YES	No	Yes	No	11	27.9	No live birth
29571	2	27.06	Secondary	2	2	YES	No	No	No	10	30.3	No live birth
29709	5	20.43	Secondary	2	2	YES	No	No	No	7.3	27.6	No live birth
29958	1	21.48	Primary	2	2	YES	No	No	No	9	32.7	No live birth
30009	1	21.91	Secondary	2	2	YES	No	No	No	8	32.8	No live birth
30035	1	24.77	Primary	2	2	YES	No	No	No	10.5	26.8	No live birth
30070	3	24.97	Secondary	1	2	YES	No	No	No	8	34.3	No live birth
30172	3	22.03	Primary	2	2	YES	No	No	No	10	34.6	No live birth
30198	8	22.48	Secondary	2	2	YES	No	No	No	7	34.4	No live birth
30256	2	19.72	Secondary	1	2	YES	No	No	No	8.5	35.1	No live birth
30270	9	29.17	Secondary	2	2	YES	No	No	No	9	30.1	No live birth
30562	4	19.1	Secondary	1	2	YES	No	No	No	9	30.3	No live birth
30570	2	21.19	Primary	1	2	YES	No	Yes	No	9.3	28	No live birth
30613	6	23.44	Secondary	2	2	YES	No	No	No	12.4	33.1	No live birth
30661	10	26.04	Secondary	2	2	YES	No	No	No	8	29	No live birth
30789	10	25.56	Secondary	2	2	YES	No	No	No	9	35.1	No live birth
30900	3	24.91	Primary	2	2	YES	No	No	No	10.9	28.4	No live birth
31016	7	21.08	Secondary	2	2	YES	No	No	No	8.6	25.8	No live birth
31077	7	23.44	Primary	1	2	YES	No	No	No	8.5	28.1	No live birth
31202	1	19.71	Secondary	1	2	YES	No	No	No	8	35.7	No live birth
31357	1	26.04	Secondary	2	2	YES	No	No	No	8	31.7	No live birth
31729	3	20.94	Primary	1	2	YES	No	No	No	9.5	34.1	No live birth
31864	9	21.88	Secondary	2	2	YES	No	No	No	10	29.9	No live birth
32100	5	22.21	Primary	2	2	YES	No	No	No	8.4	33.5	No live birth
32210	3	27.89	Primary	2	2	YES	No	Yes	No	9.5	28.8	No live birth
32228	1	20.2	Secondary	1	2	YES	No	No	No	8	35.3	No live birth
32376	2	17.15	Secondary	2	2	YES	No	No	No	9	32.1	No live birth
32395	2	20.45	Secondary	2	2	YES	No	No	No	8	27.2	No live birth
32544	2	23.05	Primary	2	2	YES	No	No	No	9	28.4	No live birth
32694	2	20.28	Primary	1	2	YES	No	No	No	9.3	22.9	No live birth
32727	3	29.32	Primary	2	2	YES	No	Yes	No	9.1	32	No live birth
32926	10	24.44	Primary	2	2	YES	No	No	No	10	27.7	No live birth
32983	4	26.67	Secondary	1	2	YES	No	No	No	8.2	33.5	No live birth
33149	5	18.75	Primary	2	2	YES	No	No	No	9	35.7	No live birth
33489	8	23.63	Secondary	1	2	YES	No	No	No	8	34.3	No live birth
33643	1	22.43	Secondary	1	2	YES	No	No	No	9	31.5	No live birth
33678	6	30.08	Secondary	1	2	YES	No	No	No	8	27.6	No live birth
33707	1	20.06	Secondary	1	2	YES	No	No	No	9	30.1	No live birth
33842	2	18.59	Secondary	2	2	YES	No	No	No	8.5	24.4	No live birth
33863	9	27.25	Primary	2	2	YES	No	Yes	No	10	31.6	No live birth
33983	1	19.63	Secondary	2	2	YES	No	No	No	9.3	26.2	No live birth
34120	2	22.77	Secondary	2	2	YES	No	No	No	9.5	35.7	No live birth
34125	1	29.14	Secondary	2	2	YES	No	Yes	No	8	30.6	No live birth
34134	4	27.34	Secondary	2	2	YES	No	No	No	13	31.6	No live birth
34221	3	18.65	Secondary	2	2	YES	No	No	No	9	22.7	No live birth
34435	3	23.01	Primary	2	2	YES	No	No	No	8.5	26.8	No live birth
34507	7	22.27	Primary	1	2	YES	No	No	No	7	22.8	No live birth
34680	4	21.67	Secondary	2	2	YES	No	No	No	8	23.9	No live birth
34937	2	23.42	Secondary	2	2	YES	No	No	No	10.8	30.6	No live birth
34981	1	20.83	Secondary	1	2	YES	No	No	No	8.5	33.3	No live birth
35212	1	21.67	Primary	1	2	YES	No	No	Yes	9	33	No live birth
35325	5	19.57	Primary	1	2	YES	No	No	No	7	31	No live birth
35386	4	23.03	Primary	1	2	YES	No	No	No	9	27.2	No live birth
35404	2	25.48	Primary	1	2	YES	No	Yes	No	8.8	28.4	No live birth
35591	6	30.8	Primary	2	2	YES	No	No	No	14	32.3	No live birth
35603	1	17.78	Secondary	1	2	YES	No	No	No	8.5	34.1	No live birth
35652	2	23.42	Primary	1	2	YES	No	Yes	No	8	27.5	No live birth
35687	2	23.12	Primary	1	2	YES	No	No	No	10	32.2	No live birth
35774	1	20.94	Secondary	2	2	YES	No	No	No	9	30.5	No live birth
36042	3	20.7	Primary	1	2	YES	No	Yes	No	8.9	26.5	No live birth
36096	3	20.81	Primary	1	2	YES	No	Yes	No	8.5	28.2	No live birth
36284	3	21.41	Primary	1	2	YES	No	No	No	9	28.3	No live birth
36377	3	22.89	Primary	1	2	YES	No	No	No	9	28.3	No live birth
36386	2	20.2	Secondary	1	2	YES	No	No	No	8	32.1	No live birth
36540	6	20.03	Primary	2	2	YES	No	No	No	7	25.5	No live birth
36700	4	24.17	Primary	1	2	YES	No	No	No	10	23.9	No live birth
36786	3	19.92	Primary	1	2	YES	No	No	No	8.3	35.6	No live birth
36856	5	21.48	Primary	1	2	YES	No	No	No	8.3	29.5	No live birth
36946	1	24.61	Secondary	1	2	YES	No	No	No	8	31	No live birth
36975	1	18.67	Secondary	1	2	YES	No	No	No	7	35.6	No live birth
37080	5	29.3	Secondary	2	2	YES	No	No	No	13	29.7	No live birth
37089	2	21.48	Secondary	1	2	YES	No	No	No	9	26.4	No live birth
37126	3	20.7	Primary	2	2	YES	No	No	No	12	24.4	No live birth
37199	1	23.05	Secondary	2	2	YES	No	No	No	10	32.5	No live birth
37382	6	20.08	Primary	2	2	YES	No	No	No	9	31.7	No live birth
37430	3	24.03	Primary	2	2	YES	No	No	No	7.5	29.3	No live birth
37579	3	33.5	Primary	2	2	YES	No	No	No	9	30.1	No live birth
37694	10	23.34	Primary	2	2	YES	No	No	No	7	34.2	No live birth
37807	2	20.7	Secondary	2	2	YES	No	No	No	8.4	26.5	No live birth
37913	5	22.27	Secondary	1	2	YES	No	No	No	8	31.4	No live birth
37985	1	19.53	Secondary	2	2	YES	No	No	No	8.4	24.7	No live birth
38165	4	20.55	Primary	2	2	YES	No	No	No	9.5	31.9	No live birth
38207	5	23.74	Secondary	2	2	YES	No	Yes	No	8	25.7	No live birth
38380	4	26.93	Secondary	2	2	YES	No	No	No	9.5	31	No live birth
38519	1	19.63	Secondary	1	2	YES	No	No	No	9.3	31.6	No live birth
38623	3	18.08	Secondary	2	2	YES	No	No	No	8	22.3	No live birth
38815	5	18.36	Primary	2	2	YES	No	No	No	8.3	31.2	No live birth
38831	1	18.13	Secondary	2	2	YES	No	No	No	8.9	31	No live birth
38859	6	21.72	Primary	2	2	YES	No	No	No	8.5	30.6	No live birth
38932	2	25.71	Secondary	2	2	YES	No	No	No	9	33.2	No live birth
39722	3	18.65	Primary	2	2	YES	No	No	No	11	26.7	No live birth
35450	5	29.97	Primary	1	1	No	Yes	Yes	No	9.2	29.2	Live birth
42037	3	24.53	Primary	1	1	No	Yes	No	No	9	25.5	Live birth
33348	6	20.44	Secondary	1	1	No	Yes	No	No	8.2	34.9	Live birth
38214	1	19.72	Secondary	2	1	No	Yes	No	No	8	32.7	Live birth
31374	3	25.34	Primary	1	1	No	Yes	No	No	8.5	32.4	Live birth
28550	2	20.2	Secondary	2	1	No	Yes	No	No	8	32	Live birth
39027	4	25.78	Secondary	2	1	No	Yes	No	No	9.8	31.4	Live birth
40580	4	21.49	Secondary	2	1	No	Yes	No	No	8	31.3	Live birth
31111	2	20.96	Secondary	1	1	No	Yes	No	No	9	35	Live birth
33045	3	18.25	Primary	2	1	No	Yes	Yes	No	7.5	31.3	Live birth
40236	3	18.25	Primary	1	1	No	Yes	No	No	10.8	33.5	Live birth
31334	2	19.71	Primary	2	1	No	Yes	No	No	9.5	23.8	Live birth
39714	9	21.22	Secondary	1	1	No	Yes	No	No	11	21	Live birth
38083	2	18.14	Primary	2	1	No	Yes	No	No	8.2	28.4	Live birth
30379	5	18.67	Secondary	1	1	No	Yes	No	No	10	23	Live birth
31079	4	18.66	Primary	1	1	No	Yes	No	No	10.1	30.5	Live birth
38401	2	18.61	Primary	2	1	No	Yes	No	No	9.6	25.9	Live birth
39153	2	25.81	Primary	1	1	No	Yes	Yes	No	10.6	30.1	Live birth
40256	6	32.05	Secondary	1	1	No	Yes	No	No	10.5	30.4	Live birth
31850	1	17.97	Secondary	1	1	No	Yes	No	No	7.5	29.1	Live birth
30483	4	20.81	Secondary	2	1	No	Yes	No	No	8.4	30.8	Live birth
39343	6	28.76	Primary	2	1	No	Yes	Yes	No	9	27.9	Live birth
38754	2	19.53	Secondary	1	1	No	Yes	No	No	9.5	35	Live birth
33555	3	19.72	Primary	1	1	No	Yes	No	No	8.2	24.8	Live birth
39680	4	21.91	Primary	1	1	No	Yes	No	No	8.2	25.5	Live birth
34196	7	25.63	Secondary	2	1	No	Yes	Yes	No	8	27.8	Live birth
33605	2	28.13	Secondary	2	1	No	Yes	No	No	9	29.3	Live birth
33178	1	18.67	Secondary	1	1	No	Yes	No	No	7.5	30.4	Live birth
36644	2	16.02	Secondary	1	1	No	Yes	No	Yes	7	33	Live birth
32809	5	19.57	Primary	1	1	No	Yes	No	No	8.8	31.6	Live birth
37266	9	28.62	Primary	2	1	No	Yes	No	No	9	30.3	Live birth
36578	1	28.04	Primary	1	1	No	Yes	No	No	11	31.5	Live birth
31886	1	21.45	Secondary	2	1	No	Yes	No	No	11	32	No live birth
37669	8	19.72	Secondary	2	1	No	Yes	No	No	7.5	33.9	No live birth
30754	1	18.65	Secondary	2	1	No	Yes	No	Yes	7	35	No live birth
33303	3	19.29	Primary	1	1	No	Yes	No	No	7.5	25	No live birth
40914	5	23.61	Primary	2	1	No	Yes	No	No	11.1	33	No live birth
40781	1	22.27	Secondary	2	1	No	Yes	No	No	7.5	30.5	No live birth
42704	3	20.58	Secondary	1	1	No	Yes	No	No	8	33.8	No live birth
42263	2	23.23	Secondary	1	1	No	Yes	No	No	11.1	28.6	No live birth
38657	1	27.39	Secondary	2	1	No	Yes	Yes	No	9	30.7	No live birth
28465	1	15.63	Secondary	2	1	No	Yes	No	No	7	25.9	No live birth
36697	2	18.82	Primary	1	1	No	Yes	No	No	7.5	31.3	No live birth
37722	5	19.48	Primary	1	1	No	Yes	No	No	7	32.7	No live birth
29842	3	16.16	Primary	2	1	No	Yes	No	No	9	28.2	No live birth
35160	1	22.48	Secondary	1	1	No	Yes	No	No	8.1	27.5	No live birth
40156	3	23.88	Primary	1	1	No	Yes	No	No	9.2	25.1	No live birth
41073	3	18.73	Primary	1	1	No	Yes	No	No	11.5	28	No live birth
30529	2	22.03	Secondary	2	1	No	Yes	No	No	8.9	32.9	No live birth
35913	5	26.06	Primary	1	1	No	Yes	Yes	No	9	27.3	No live birth
32208	2	19.81	Secondary	1	1	No	Yes	No	No	9.6	25	No live birth
40684	3	18.67	Secondary	2	1	No	Yes	No	No	8.5	29.5	No live birth
38427	9	29.3	Primary	1	1	No	Yes	No	No	7	27.5	No live birth
30632	1	21.23	Primary	2	1	No	Yes	No	No	9	29.4	No live birth
34711	7	18.83	Secondary	1	1	No	Yes	No	No	9	35	No live birth
32578	1	20.66	Secondary	1	1	No	Yes	Yes	No	7	29.1	No live birth
33528	3	19.29	Primary	1	1	No	Yes	No	No	9	30.5	No live birth
41638	1	23.88	Secondary	1	1	No	Yes	No	No	7	33.7	No live birth
23685	1	22.32	Secondary	2	1	No	Yes	No	No	12	29.1	No live birth
38893	2	24.84	Primary	1	1	No	Yes	No	No	9	27.8	No live birth
31932	6	25.46	Secondary	2	1	No	Yes	No	No	9.5	24.5	No live birth
31789	5	18.82	Primary	1	1	No	Yes	No	No	8.2	28.5	No live birth
37908	9	23.34	Secondary	2	1	No	Yes	No	No	11	34.7	No live birth
12774	4	19.15	Secondary	2	1	No	Yes	No	No	8.5	30.8	No live birth
32202	3	20.31	Secondary	2	1	No	Yes	No	No	10.4	34.6	No live birth
40946	3	21.19	Secondary	2	1	No	Yes	No	No	8	30.8	No live birth
38958	4	20.45	Secondary	1	1	No	Yes	No	Yes	13	31.8	No live birth
37327	4	28.72	Primary	2	1	No	Yes	No	No	10	35	No live birth
39761	1	21.31	Primary	2	1	No	Yes	No	No	9	34.2	No live birth
42079	3	25.78	Primary	1	1	No	Yes	No	No	11	24	No live birth
24740	6	20.03	Secondary	2	1	No	Yes	No	No	8.5	33.8	No live birth
33815	3	21.45	Secondary	1	1	No	Yes	No	No	9	29.2	No live birth
38892	1	17.8	Secondary	2	1	No	Yes	No	No	8	34.6	No live birth
34705	4	30.12	Primary	1	1	No	Yes	Yes	No	8	29.4	No live birth
41251	5	25.22	Secondary	1	1	No	Yes	No	No	8.5	29.4	No live birth
37155	5	19.07	Primary	1	1	No	Yes	No	No	8.5	24.5	No live birth
32206	3	20.58	Primary	2	1	No	Yes	No	No	9.5	35	No live birth
35731	3	22.22	Secondary	1	1	No	Yes	No	No	10	34.9	No live birth
41217	7	23.07	Secondary	1	1	No	Yes	No	No	7	32.2	No live birth
41134	4	19.13	Secondary	1	1	No	Yes	No	No	9	31.6	No live birth
38886	1	20.81	Secondary	2	1	No	Yes	No	No	8.5	32.4	No live birth
31806	3	23.3	Primary	2	1	No	Yes	No	No	8.5	31.4	No live birth
36094	4	23.44	Secondary	2	1	No	Yes	No	No	9	31.9	No live birth
19946	6	29.71	Secondary	2	1	No	Yes	Yes	No	8	33.6	No live birth
36881	1	19.53	Secondary	1	1	No	Yes	No	No	8.7	20	No live birth
33765	4	24.22	Secondary	1	1	No	Yes	No	No	8.2	31.2	No live birth
33930	2	17.11	Secondary	2	1	No	Yes	No	No	8	34.7	No live birth
40658	4	22.48	Secondary	1	1	No	Yes	No	No	8	34.2	No live birth
16153	9	21.48	Primary	1	1	No	Yes	Yes	No	8	32.6	No live birth
40570	3	16.23	Primary	1	1	No	Yes	No	No	11	27.3	No live birth
31092	1	20.31	Primary	2	1	No	Yes	No	No	10.7	34.2	No live birth
38704	2	23.05	Primary	1	1	No	Yes	No	No	9	31	No live birth
36581	8	19.56	Secondary	2	1	No	Yes	No	Yes	9	34.5	No live birth
31652	5	21.97	Primary	1	1	No	Yes	No	Yes	9.4	29.3	No live birth
30148	1	24.35	Primary	1	1	No	Yes	No	No	8	35	No live birth
37030	2	19.81	Primary	1	1	No	Yes	No	No	9	30	No live birth
36829	2	23.23	Primary	1	1	No	Yes	Yes	No	10.7	30	No live birth
32718	4	18.97	Primary	2	1	No	Yes	No	Yes	8	30.7	No live birth
37815	1	21.75	Primary	1	1	No	Yes	No	No	10.1	27.7	No live birth
35642	1	22.06	Secondary	1	1	No	Yes	No	No	8	28.6	No live birth
40192	7	21.36	Primary	2	1	No	Yes	No	No	7	32.8	No live birth
33695	3	24.22	Secondary	1	1	No	Yes	No	No	8.2	29.2	No live birth
31167	5	25.34	Secondary	2	1	No	Yes	No	No	8	26	No live birth
28969	3	26.29	Secondary	2	1	No	Yes	Yes	No	13.3	27.8	No live birth
31889	2	24.17	Secondary	2	1	No	Yes	No	No	8.5	28.9	No live birth
38109	3	20.03	Secondary	2	1	No	Yes	No	No	7.2	30.4	No live birth
38904	3	27.68	Secondary	2	1	No	Yes	No	No	9	27.8	No live birth
36530	2	19.82	Secondary	2	1	No	Yes	No	No	9	30.8	No live birth
38236	5	23.07	Primary	1	1	No	Yes	No	No	9	31.4	No live birth
33840	3	19.23	Secondary	2	1	No	Yes	No	No	11.6	30.9	No live birth
36429	1	25.97	Secondary	2	1	No	Yes	No	No	10	25.1	No live birth
33197	6	25.3	Primary	2	1	No	Yes	No	No	12	28.3	No live birth
24863	3	20.72	Secondary	2	1	No	Yes	No	No	7.8	34	No live birth
31667	2	22.06	Secondary	1	1	No	Yes	No	No	13	30.9	No live birth
33160	5	23.63	Primary	1	1	No	Yes	No	No	13	21.7	No live birth
37784	2	21.35	Secondary	2	1	No	Yes	No	No	7.8	33.2	No live birth
35648	8	23.73	Secondary	2	1	No	Yes	No	No	9	31.4	No live birth
37139	2	20.2	Secondary	2	1	No	Yes	No	No	9	28.3	No live birth
31236	3	20.31	Primary	1	1	No	Yes	Yes	No	9.2	27	No live birth
37055	3	20.31	Secondary	2	1	No	Yes	No	No	7.7	26.2	No live birth

## Sheet: logistic-neonatal complication
ID	Infertility duration(years)	BMI	Infertility type	Transplant cycle	Transplant number	high-quality blastocysts	transplantable double blastocyst	PCOS	EMS	Male	EN	Age	Complications	Preterm birth	low birth weight infant	Birth defect	macrosomia
42037	3	24.53	Primary	1	1	No	Yes	No	No	Yes	9	25.5	Neonatal complications	No	No	No	Yes
40580	4	21.49	Secondary	2	1	No	Yes	No	No	No	8	31.3	Non-neonatal complications	No	No	No	No
40256	6	32.05	Secondary	1	1	No	Yes	No	No	Yes	10.5	30.4	Non-neonatal complications	No	No	No	No
40236	3	18.25	Primary	1	1	No	Yes	No	No	No	10.8	33.5	Non-neonatal complications	No	No	No	No
40001	1	21.22	Secondary	1	2	Yes	No	Yes	No	No	8	29.4	Non-neonatal complications	No	No	No	No
39878	4	18.03	Secondary	1	2	Yes	Yes	No	No	Yes	8.4	31.9	Neonatal complications	Yes	Yes	No	No
39850	1	22.64	Secondary	1	1	Yes	No	No	No	No	9	25.4	Non-neonatal complications	No	No	No	No
39764	4	21.45	Primary	1	1	Yes	No	No	No	Yes	9	28	Non-neonatal complications	No	No	No	No
39735	1	17.22	Secondary	1	1	Yes	No	No	No	No	7	31.3	Non-neonatal complications	No	No	No	No
39714	9	21.22	Secondary	1	1	No	Yes	No	No	No	11	21	Non-neonatal complications	No	No	No	No
39684	3	21.48	Primary	2	2	No	Yes	No	No	No	8.5	35.8	Non-neonatal complications	No	No	No	No
39680	4	21.91	Primary	1	1	No	Yes	No	No	No	8.2	25.5	Non-neonatal complications	No	No	No	No
39675	2	28.04	Secondary	1	2	Yes	No	No	No	No	7	23.1	Non-neonatal complications	No	No	No	No
39638	7	18.31	Secondary	1	1	Yes	No	No	Yes	No	8.5	29.2	Non-neonatal complications	No	No	No	No
39596	1	18.66	Secondary	2	2	Yes	No	No	No	No	7.5	28.8	Non-neonatal complications	No	No	No	No
39549	4	20.7	Secondary	2	2	Yes	Yes	No	No	No	8.5	35	Non-neonatal complications	No	No	No	No
39538	1	23.59	Primary	1	2	Yes	No	Yes	No	No	8	33	Non-neonatal complications	No	No	No	No
39531	8	20.93	Primary	1	2	Yes	Yes	No	No	No	8	27.5	Neonatal complications	Yes	Yes	No	No
39454	5	27.83	Secondary	1	2	Yes	No	No	No	No	14	23	Non-neonatal complications	No	No	No	No
39444	5	21.56	Secondary	1	2	Yes	Yes	No	No	No	7.5	34.6	Non-neonatal complications	No	No	No	No
39441	3	28.35	Secondary	2	2	Yes	Yes	No	No	No	10	32.9	Neonatal complications	Yes	Yes	No	No
39439	4	18.55	Secondary	1	1	Yes	No	No	No	No	9	33.2	Non-neonatal complications	No	No	No	No
39401	1	22.77	Secondary	1	2	Yes	Yes	No	No	Yes	9	32.6	Neonatal complications	Yes	Yes	No	No
39364	1	17.48	Secondary	1	2	Yes	No	No	No	No	14.1	33.4	Neonatal complications	Yes	Yes	No	No
39361	1	24.84	Secondary	1	2	Yes	Yes	No	No	Yes	9	34.7	Non-neonatal complications	No	No	No	No
39357	4	23.92	Primary	1	1	Yes	No	No	No	No	11	30.1	Non-neonatal complications	No	No	No	No
39343	6	28.76	Primary	2	1	No	Yes	Yes	No	No	9	27.9	Non-neonatal complications	No	No	No	No
39339	3	22.89	Secondary	2	2	No	Yes	No	No	No	8.5	33.9	Neonatal complications	No	No	No	Yes
39308	2	18.75	Primary	1	2	Yes	Yes	Yes	No	No	9	29	Non-neonatal complications	No	No	No	No
39276	4	20.7	Primary	2	2	Yes	No	No	No	No	8	30.6	Neonatal complications	Yes	No	No	No
39269	7	17.63	Primary	1	2	Yes	Yes	No	No	No	8	28.4	Neonatal complications	No	Yes	No	No
39258	4	20.81	Primary	2	2	Yes	Yes	No	No	No	10	32.1	Non-neonatal complications	No	No	No	No
39257	2	24.97	Primary	2	2	Yes	Yes	No	No	No	8.7	26.4	Non-neonatal complications	No	No	No	No
39250	3	25.39	Primary	1	1	Yes	No	No	No	Yes	9.5	26.1	Non-neonatal complications	No	No	No	No
39248	3	25.33	Primary	1	1	Yes	No	No	No	No	7	29.1	Non-neonatal complications	No	No	No	No
39212	1	16.59	Secondary	1	2	Yes	No	No	No	No	7.5	32.9	Neonatal complications	Yes	Yes	No	No
39153	2	25.81	Primary	1	1	No	Yes	Yes	No	No	10.6	30.1	Non-neonatal complications	No	No	No	No
39121	3	22.03	Secondary	2	2	Yes	Yes	No	No	Yes	7.5	25.6	Non-neonatal complications	No	No	No	No
39087	1	22.03	Primary	1	1	Yes	No	No	Yes	No	9.5	30.7	Non-neonatal complications	No	No	No	No
39067	1	27.64	Secondary	1	2	Yes	Yes	No	No	No	8.5	35	Non-neonatal complications	No	No	No	No
39036	10	16.94	Primary	1	2	Yes	No	No	No	No	8	30	Neonatal complications	Yes	Yes	No	No
39031	2	23.34	Primary	2	2	No	Yes	No	No	No	11	32.3	Non-neonatal complications	No	No	No	No
39027	4	25.78	Secondary	2	1	No	Yes	No	No	No	9.8	31.4	Non-neonatal complications	No	No	No	No
39021	4	17.47	Primary	2	2	Yes	Yes	No	No	No	9	26.2	Non-neonatal complications	No	No	No	No
39010	3	22.6	Primary	1	1	Yes	No	No	No	No	8.5	28.5	Neonatal complications	Yes	No	No	No
38998	2	20.03	Secondary	1	2	Yes	Yes	No	No	No	7	30.2	Neonatal complications	Yes	Yes	No	No
38992	1	21.88	Secondary	1	2	Yes	Yes	No	No	No	9	31.3	Neonatal complications	Yes	Yes	No	No
38960	3	20	Primary	1	2	Yes	No	Yes	No	No	12.8	24.4	Neonatal complications	Yes	No	No	No
38955	3	18.49	Primary	1	2	No	Yes	No	No	No	8	29.5	Non-neonatal complications	No	No	No	No
38899	3	17.26	Primary	1	1	Yes	No	No	No	No	8.5	28.9	Non-neonatal complications	No	No	No	No
38765	3	17.78	Primary	1	1	Yes	No	No	No	No	7.8	21	Non-neonatal complications	No	No	No	No
38754	2	19.53	Secondary	1	1	No	Yes	No	No	No	9.5	35	Non-neonatal complications	No	No	No	No
38674	3	21.45	Primary	2	1	Yes	No	No	No	No	10	27.4	Neonatal complications	No	No	No	Yes
38652	1	21.36	Secondary	2	2	Yes	No	No	No	No	8.3	25	Non-neonatal complications	No	No	No	No
38630	2	18.43	Secondary	1	1	Yes	No	No	No	No	9	35	Non-neonatal complications	No	No	No	No
38626	4	22.94	Primary	2	2	Yes	Yes	No	No	No	9	22.1	Non-neonatal complications	No	No	No	No
38543	1	19.53	Primary	2	2	No	Yes	No	No	No	7	32.9	Neonatal complications	Yes	Yes	No	No
38540	3	21.76	Primary	2	2	Yes	Yes	Yes	No	No	10	31.2	Neonatal complications	No	No	No	Yes
38519	1	19.63	Secondary	2	2	Yes	Yes	No	No	No	8.9	31.7	Non-neonatal complications	No	No	No	No
38516	5	24.34	Secondary	2	2	Yes	Yes	No	No	No	9	26.7	Neonatal complications	Yes	Yes	No	No
38511	2	23.23	Secondary	2	2	Yes	Yes	No	No	No	10.4	30.2	Non-neonatal complications	No	No	No	No
38506	4	22.48	Primary	2	2	Yes	Yes	No	No	Yes	9	26.1	Non-neonatal complications	No	No	No	No
38478	4	25.34	Primary	1	1	Yes	No	No	No	No	7.9	28.9	Non-neonatal complications	No	No	No	No
38466	3	20.81	Primary	1	1	Yes	No	No	No	No	10	30.8	Neonatal complications	No	No	No	Yes
38458	1	25.22	Primary	2	2	Yes	Yes	Yes	No	No	8	31.5	Neonatal complications	Yes	Yes	No	No
38450	7	18.96	Secondary	1	1	Yes	No	No	No	No	8	33	Neonatal complications	No	No	No	Yes
38443	2	21.23	Primary	1	2	Yes	No	No	No	No	11	30.7	Non-neonatal complications	No	No	No	No
38433	5	28.76	Primary	2	2	Yes	No	No	No	No	7	26.8	Neonatal complications	No	Yes	No	No
38416	1	18.03	Secondary	2	2	Yes	No	No	No	No	10	32	Non-neonatal complications	No	No	No	No
38401	2	18.61	Primary	2	1	No	Yes	No	No	No	9.6	25.9	Non-neonatal complications	No	No	No	No
38306	4	17.63	Primary	2	2	Yes	Yes	Yes	No	No	8.5	31.8	Non-neonatal complications	No	No	No	No
38301	2	20.96	Secondary	2	2	No	Yes	No	No	No	7.3	25.7	Non-neonatal complications	No	No	No	No
38294	1	20.24	Secondary	1	2	No	Yes	No	No	No	8.5	35.5	Non-neonatal complications	No	No	No	No
38278	3	21.41	Secondary	2	1	Yes	No	No	No	No	9.5	27.9	Neonatal complications	No	No	No	Yes
38276	2	19.92	Primary	2	2	Yes	No	No	No	Yes	8.5	24.4	Non-neonatal complications	No	No	No	No
38222	1	16.94	Secondary	1	1	Yes	No	No	No	No	7.5	29.8	Non-neonatal complications	No	No	No	No
38214	1	19.72	Secondary	2	1	No	Yes	No	No	No	8	32.7	Neonatal complications	No	No	No	Yes
38205	1	17.01	Secondary	1	1	Yes	No	No	No	No	11	33.4	Non-neonatal complications	No	No	No	No
38191	3	24.61	Primary	2	2	No	Yes	No	No	No	11	30	Neonatal complications	No	Yes	No	No
38181	4	20.03	Primary	1	1	Yes	No	Yes	No	No	7.5	31.6	Non-neonatal complications	No	No	No	No
38134	2	21.48	Primary	1	2	Yes	Yes	No	No	No	13	27.4	Non-neonatal complications	No	No	No	No
38111	2	17.99	Primary	1	2	Yes	Yes	No	No	No	9	27.8	Non-neonatal complications	No	No	No	No
38102	8	21.23	Primary	1	1	Yes	No	No	No	Yes	8	35	Non-neonatal complications	No	No	No	No
38097	1	27.55	Primary	2	2	No	Yes	No	No	No	9	27.1	Non-neonatal complications	No	No	No	No
38092	2	20.28	Primary	1	2	Yes	Yes	No	No	No	12	28.9	Neonatal complications	No	Yes	No	No
38083	2	18.14	Primary	2	1	No	Yes	No	No	No	8.2	28.4	Non-neonatal complications	No	No	No	No
38073	1	18.83	Secondary	2	1	Yes	No	No	No	No	11	30.7	Non-neonatal complications	No	No	No	No
38065	2	29.52	Secondary	1	2	No	Yes	Yes	No	No	9	32.3	Neonatal complications	No	Yes	No	No
38052	2	18.9	Primary	2	2	Yes	Yes	No	No	No	10.8	29.9	Non-neonatal complications	No	No	No	No
38040	2	22.64	Primary	1	2	Yes	Yes	Yes	No	No	8.5	27.1	Non-neonatal complications	No	No	No	No
38038	5	27.55	Primary	2	1	Yes	No	No	No	No	11	28.4	Neonatal complications	No	Yes	No	No
38035	3	18.59	Secondary	1	2	No	Yes	Yes	No	No	10	29.7	Non-neonatal complications	Yes	No	No	No
38033	2	23.71	Secondary	2	1	Yes	No	No	No	No	8.2	30.1	Neonatal complications	No	No	No	Yes
38021	1	24.56	Secondary	1	2	Yes	Yes	Yes	No	No	9.8	34.8	Neonatal complications	Yes	Yes	No	No
38012	7	20.08	Secondary	2	2	Yes	Yes	No	No	No	8	28.6	Non-neonatal complications	No	No	No	No
38004	2	19.98	Primary	1	1	Yes	No	No	No	No	9	28.3	Non-neonatal complications	No	No	No	No
37989	1	23.51	Secondary	1	2	Yes	No	No	No	No	7	32.1	Non-neonatal complications	No	No	No	No
37950	3	20.03	Secondary	1	2	Yes	No	No	Yes	No	9	29	Neonatal complications	No	Yes	No	No
37944	4	18.65	Primary	1	2	No	Yes	Yes	No	No	8.5	28.2	Non-neonatal complications	No	No	No	No
37938	4	28.25	Primary	1	2	Yes	No	Yes	No	No	9	31.5	Non-neonatal complications	No	No	No	No
37928	2	22.89	Primary	1	1	Yes	No	No	No	No	8	28.7	Neonatal complications	No	Yes	No	No
37896	2	22.03	Secondary	2	2	Yes	No	No	No	No	7	29.6	Non-neonatal complications	No	No	No	No
37892	4	19.23	Secondary	1	1	Yes	No	No	No	No	11	32	Neonatal complications	No	No	No	Yes
37884	5	19.4	Secondary	2	2	Yes	No	No	No	No	8.5	32.5	Non-neonatal complications	No	No	No	No
37878	5	20.83	Secondary	2	2	Yes	Yes	No	No	No	11	32.2	Neonatal complications	Yes	Yes	No	No
37875	3	21.26	Primary	1	2	Yes	No	No	No	No	7	21.9	Non-neonatal complications	No	No	No	No
37858	3	18.73	Secondary	1	2	Yes	Yes	No	No	No	8.1	29.2	Neonatal complications	No	Yes	No	No
37853	2	17.58	Secondary	2	2	No	Yes	No	No	No	7.5	28.3	Non-neonatal complications	No	No	No	No
37850	1	20.32	Primary	1	1	Yes	No	No	No	No	9	29	Non-neonatal complications	No	No	No	No
37841	4	19.03	Primary	1	2	No	Yes	Yes	No	No	10	31.5	Non-neonatal complications	No	No	No	No
37836	3	23.23	Secondary	1	1	Yes	No	Yes	No	No	8	33.1	Neonatal complications	No	No	No	Yes
37835	3	26.67	Primary	2	2	No	Yes	Yes	No	No	9	34.7	Neonatal complications	No	Yes	No	No
37827	6	17.58	Secondary	1	2	Yes	Yes	No	No	No	8	29.9	Non-neonatal complications	No	No	No	No
37813	2	21.09	Primary	2	2	Yes	Yes	No	No	No	8.4	35	Non-neonatal complications	No	No	No	No
37801	1	18.83	Primary	1	2	No	Yes	No	No	No	8.5	31.7	Non-neonatal complications	No	No	No	No
37800	4	19.3	Primary	1	2	Yes	Yes	Yes	No	No	9	33	Non-neonatal complications	No	No	No	No
37762	4	21.78	Primary	1	2	Yes	No	No	No	No	8	30.8	Non-neonatal complications	No	No	No	No
37758	3	20.31	Primary	2	2	No	Yes	No	No	Yes	9	33.5	Non-neonatal complications	No	No	No	No
37754	4	25.22	Primary	2	2	No	Yes	Yes	No	No	9	35.4	Neonatal complications	Yes	Yes	No	No
37746	2	25.78	Secondary	1	2	Yes	Yes	No	No	No	8	29.1	Non-neonatal complications	No	No	No	No
37734	4	20.45	Primary	1	2	Yes	No	No	No	No	12	29.8	Non-neonatal complications	No	No	No	No
37729	2	21.1	Secondary	2	2	Yes	Yes	No	No	No	7.5	27.8	Non-neonatal complications	No	No	No	No
37728	4	18.78	Secondary	1	1	Yes	No	Yes	No	No	7	34.4	Non-neonatal complications	No	No	No	No
37719	4	21.33	Secondary	2	2	Yes	No	No	No	No	7	30.8	Non-neonatal complications	No	No	No	No
37709	3	19.1	Secondary	1	2	Yes	Yes	No	No	No	10	30.2	Non-neonatal complications	No	No	No	No
37696	5	15.23	Secondary	2	2	Yes	Yes	No	No	No	7	31.2	Non-neonatal complications	No	No	No	No
37680	5	22.2	Primary	1	2	Yes	No	No	No	Yes	8.5	27.7	Neonatal complications	Yes	Yes	No	No
37678	1	27.89	Secondary	1	1	Yes	No	No	No	No	13	28.2	Non-neonatal complications	No	No	No	No
37646	1	22.31	Secondary	1	2	Yes	Yes	No	No	No	9.5	31.2	Non-neonatal complications	No	No	No	No
37623	1	22.04	Secondary	2	2	No	Yes	No	No	No	8.5	32.9	Non-neonatal complications	No	No	No	No
37622	1	21.83	Secondary	2	2	Yes	Yes	No	No	Yes	8	27.3	Non-neonatal complications	No	No	No	No
37601	2	18.65	Primary	1	1	Yes	No	No	No	No	8.3	28.4	Non-neonatal complications	No	No	No	No
37570	3	21.33	Secondary	1	1	Yes	No	No	No	No	9	28.3	Non-neonatal complications	No	No	No	No
37554	1	22.27	Secondary	1	2	Yes	No	No	No	No	9	32.3	Non-neonatal complications	No	No	No	No
37528	2	18.03	Secondary	2	1	Yes	No	Yes	No	No	7	27.7	Non-neonatal complications	No	No	No	No
37524	4	26.22	Secondary	1	2	No	Yes	Yes	No	No	10.1	28.4	Neonatal complications	Yes	Yes	No	No
37519	2	22.83	Primary	2	2	Yes	Yes	No	No	No	9.7	34.1	Neonatal complications	No	No	Yes	No
37508	2	24.03	Secondary	2	2	No	Yes	No	No	No	8.7	34	Non-neonatal complications	No	No	No	No
37481	2	20.03	Primary	2	1	Yes	No	No	No	No	10	25.1	Non-neonatal complications	No	No	No	No
37442	1	20.55	Secondary	2	2	Yes	Yes	No	No	No	7	26.9	Non-neonatal complications	No	No	No	No
37439	5	19.65	Primary	1	2	No	Yes	No	No	No	10	33.1	Non-neonatal complications	No	No	No	No
37425	3	26.29	Primary	1	1	Yes	No	No	No	No	9.6	27.4	Non-neonatal complications	No	No	No	No
37397	2	26.17	Secondary	1	2	Yes	No	No	No	No	9.5	30.7	Neonatal complications	Yes	Yes	No	No
37371	3	17.31	Primary	1	2	Yes	No	No	No	No	9.5	26.6	Non-neonatal complications	No	No	No	No
37355	3	21.48	Secondary	1	2	No	Yes	Yes	No	No	8.5	26.2	Non-neonatal complications	No	No	No	No
37345	1	19.23	Primary	2	2	Yes	Yes	No	No	No	11.2	25.8	Non-neonatal complications	No	No	No	No
37325	4	20.32	Secondary	1	2	Yes	No	No	No	No	8	23.8	Neonatal complications	No	Yes	No	No
37323	4	22.22	Primary	2	2	Yes	Yes	No	No	No	9	31.1	Neonatal complications	No	Yes	No	No
37316	2	22.21	Secondary	2	2	Yes	Yes	No	No	No	8.4	34	Non-neonatal complications	No	No	No	No
37292	3	20.03	Secondary	1	1	Yes	No	No	No	No	7.6	31.9	Non-neonatal complications	No	No	No	No
37275	4	24.56	Primary	1	2	Yes	No	Yes	No	No	10.4	27.6	Neonatal complications	Yes	Yes	No	No
37268	2	21.64	Secondary	1	2	Yes	Yes	No	No	No	8	23.3	Non-neonatal complications	No	No	No	No
37266	9	28.62	Primary	2	1	No	Yes	No	No	No	9	30.3	Neonatal complications	Yes	Yes	No	No
37237	1	21.48	Secondary	1	2	Yes	No	No	No	No	9	23.9	Non-neonatal complications	No	No	No	No
37233	1	26.62	Primary	1	2	Yes	No	Yes	No	No	11	21.8	Neonatal complications	No	No	No	Yes
37226	2	28.13	Secondary	2	2	Yes	Yes	No	No	No	9	30.7	Non-neonatal complications	No	No	No	No
37193	4	19.98	Primary	1	1	Yes	No	No	No	Yes	8	30.4	Neonatal complications	No	Yes	No	No
37183	1	19.56	Secondary	2	2	Yes	Yes	No	No	No	9	32.2	Neonatal complications	Yes	No	No	No
37181	2	17.15	Primary	1	1	Yes	No	No	No	No	8.5	34.5	Non-neonatal complications	No	No	No	No
37156	3	21.37	Secondary	1	2	Yes	Yes	No	No	No	8.6	32.4	Non-neonatal complications	No	No	No	No
37151	2	17.69	Secondary	2	2	Yes	Yes	No	No	No	9	35	Non-neonatal complications	No	No	No	No
37147	1	19.98	Secondary	1	1	Yes	No	No	No	No	8	35	Non-neonatal complications	No	No	No	No
37135	7	29.24	Secondary	1	2	Yes	Yes	Yes	No	No	7.8	33.1	Non-neonatal complications	No	No	No	No
37128	2	21.23	Secondary	2	2	Yes	Yes	No	No	No	8	33.8	Non-neonatal complications	No	No	No	No
37123	5	18.07	Primary	1	2	Yes	Yes	Yes	No	No	7.5	27.6	Non-neonatal complications	No	No	No	No
37113	10	25.81	Primary	1	2	Yes	No	Yes	No	No	7	26.6	Non-neonatal complications	No	No	No	No
37103	4	16.18	Primary	1	1	Yes	No	No	No	No	8	29.4	Non-neonatal complications	No	No	No	No
37089	2	21.48	Secondary	2	2	Yes	Yes	No	No	No	9	26.5	Non-neonatal complications	No	No	No	No
37083	1	19.14	Secondary	1	2	Yes	Yes	No	No	No	11.8	29.9	Non-neonatal complications	No	No	No	No
37082	1	19.43	Primary	2	2	Yes	Yes	No	No	No	11	31.6	Neonatal complications	No	No	No	Yes
37063	5	20.94	Primary	1	2	Yes	No	Yes	No	No	7.5	32.7	Non-neonatal complications	No	No	No	No
37057	2	27.55	Secondary	2	2	Yes	Yes	No	No	No	7	31.7	Neonatal complications	No	No	No	Yes
37049	2	22.38	Secondary	1	2	Yes	No	No	No	No	8	34.7	Neonatal complications	Yes	No	No	No
37047	3	21.51	Primary	1	1	Yes	No	No	No	No	9	28.3	Non-neonatal complications	No	No	No	No
37037	2	16.94	Secondary	1	2	Yes	Yes	No	No	Yes	9.2	30.9	Non-neonatal complications	No	No	No	No
37025	2	23.88	Secondary	2	2	No	Yes	No	No	No	10.8	30.9	Non-neonatal complications	No	No	No	No
36999	1	21.64	Secondary	1	2	Yes	No	No	No	No	8	31.7	Non-neonatal complications	No	No	No	No
36991	7	22.64	Primary	2	2	Yes	No	Yes	No	No	7.5	34.4	Neonatal complications	No	Yes	No	No
36972	5	22.89	Primary	2	2	No	Yes	No	No	No	10	25.3	Non-neonatal complications	No	No	No	No
36928	2	28.89	Secondary	1	1	Yes	No	No	No	No	11	28.6	Non-neonatal complications	No	No	No	No
36908	2	18.67	Secondary	2	2	Yes	Yes	No	No	No	8.5	30	Neonatal complications	Yes	Yes	No	No
36887	2	18	Primary	1	2	Yes	No	Yes	No	No	8	29.6	Neonatal complications	Yes	Yes	No	No
36883	5	19.11	Primary	1	1	Yes	No	No	No	No	9	30	Non-neonatal complications	No	No	No	No
36881	1	19.53	Secondary	2	2	No	Yes	No	No	No	10	35.8	Non-neonatal complications	No	No	No	No
36856	5	21.48	Secondary	2	1	Yes	No	No	No	No	9	29.8	Non-neonatal complications	No	No	No	No
36735	2	18.36	Primary	1	2	Yes	No	No	No	No	9	27.5	Non-neonatal complications	No	No	No	No
36723	6	19.92	Primary	1	2	No	Yes	Yes	No	No	7.3	30.4	Non-neonatal complications	No	No	No	No
36717	2	24.44	Secondary	2	2	No	Yes	No	No	Yes	8	32.8	Non-neonatal complications	Yes	No	No	No
36709	1	18.67	Primary	1	2	Yes	Yes	Yes	No	No	9	26.7	Non-neonatal complications	No	No	No	No
36703	1	22.31	Primary	2	2	Yes	Yes	No	No	No	10	26	Non-neonatal complications	No	No	No	No
36694	1	23.51	Secondary	1	2	Yes	No	No	No	No	8.5	29.5	Neonatal complications	No	No	No	Yes
36680	4	19.63	Secondary	2	2	Yes	Yes	No	No	No	9	27.2	Non-neonatal complications	No	No	No	No
36666	3	27.43	Primary	1	2	Yes	Yes	Yes	No	No	9.9	25.5	Neonatal complications	Yes	Yes	No	No
36662	2	16.94	Primary	1	2	Yes	Yes	No	No	No	7	28.2	Non-neonatal complications	No	No	No	No
36655	4	23.44	Secondary	1	1	Yes	No	No	No	No	9	29.4	Non-neonatal complications	No	No	No	No
36644	2	16.02	Secondary	1	1	No	Yes	No	Yes	No	7	33	Neonatal complications	No	Yes	No	No
36637	4	19.92	Primary	1	2	Yes	No	No	No	No	10	30.3	Non-neonatal complications	No	No	No	No
36636	5	22.04	Primary	2	2	Yes	Yes	Yes	No	No	11	26.1	Neonatal complications	No	No	No	Yes
36619	3	24.61	Primary	2	2	Yes	No	Yes	No	No	9.1	30.1	Neonatal complications	Yes	Yes	No	No
36578	1	28.04	Primary	1	1	No	Yes	No	No	Yes	11	31.5	Neonatal complications	Yes	Yes	No	No
36565	3	19.63	Primary	1	2	Yes	No	No	No	No	7	23.2	Non-neonatal complications	No	No	No	No
36545	6	20.43	Secondary	2	2	Yes	Yes	No	No	No	8	33.6	Neonatal complications	No	No	No	Yes
36541	3	25.53	Secondary	1	1	Yes	No	No	No	Yes	7	22.3	Non-neonatal complications	No	No	No	No
36511	5	18.67	Secondary	2	2	Yes	Yes	No	No	No	8.5	23.3	Non-neonatal complications	No	No	No	No
36491	5	19.88	Primary	2	2	Yes	Yes	Yes	No	No	8	31.1	Neonatal complications	Yes	Yes	No	No
36483	4	18.49	Primary	2	2	Yes	No	No	No	No	8.2	32.1	Non-neonatal complications	No	No	No	No
36461	1	17.04	Secondary	1	2	Yes	No	No	No	No	9	25.4	Non-neonatal complications	No	No	No	No
36434	2	21.45	Primary	1	2	Yes	Yes	No	No	No	9.6	32.2	Neonatal complications	Yes	Yes	No	No
36389	1	20.03	Secondary	1	2	Yes	Yes	No	No	No	12	35	Non-neonatal complications	No	No	No	No
36377	3	22.89	Primary	2	2	No	Yes	No	No	Yes	8.5	28.4	Non-neonatal complications	No	No	No	No
36361	1	20.31	Secondary	2	2	Yes	No	No	No	No	9	34.9	Neonatal complications	No	Yes	No	No
36338	4	23.71	Primary	1	2	Yes	Yes	No	No	Yes	8	27.3	Neonatal complications	Yes	Yes	No	No
36334	2	22.27	Secondary	2	1	Yes	No	No	No	No	11	30.7	Non-neonatal complications	No	No	No	No
36321	2	24.22	Secondary	1	2	Yes	No	No	No	No	8.5	24.8	Non-neonatal complications	No	No	No	No
36296	3	21.72	Primary	1	2	Yes	Yes	No	No	No	9	34.5	Neonatal complications	Yes	Yes	No	No
36284	3	21.41	Primary	2	2	Yes	Yes	No	No	No	8	28.5	Non-neonatal complications	No	No	No	No
36281	4	20.7	Secondary	2	2	No	Yes	No	No	No	9.5	32	Non-neonatal complications	No	No	No	No
36271	1	20.43	Secondary	2	2	Yes	Yes	No	No	No	9	28.1	Non-neonatal complications	No	No	No	No
36266	12	20.7	Secondary	1	1	Yes	No	No	No	No	11.3	32.7	Non-neonatal complications	No	No	No	No
36252	4	20.2	Primary	2	2	No	Yes	Yes	No	No	8.9	28	Neonatal complications	No	Yes	No	No
36238	2	20.2	Primary	1	1	Yes	No	No	No	No	7.8	25.6	Non-neonatal complications	No	No	No	No
36233	3	23.88	Primary	1	2	Yes	No	Yes	No	No	10.9	24.3	Non-neonatal complications	No	No	No	No
36219	1	18.87	Secondary	1	1	Yes	No	No	No	No	9	24.7	Non-neonatal complications	No	No	No	No
36217	4	20.7	Primary	1	1	Yes	No	No	No	No	8.5	31.3	Non-neonatal complications	No	No	No	No
36208	4	25.71	Primary	2	2	No	Yes	No	No	No	7.5	24.7	Non-neonatal complications	No	No	No	No
36202	1	20.83	Primary	2	2	Yes	Yes	No	No	Yes	7.8	31	Non-neonatal complications	No	No	No	No
36197	1	20.96	Secondary	1	2	Yes	Yes	No	No	No	9.5	30.7	Non-neonatal complications	No	No	No	No
36189	3	22.66	Secondary	1	2	Yes	Yes	No	No	No	8.5	29.6	Neonatal complications	No	Yes	No	No
36181	2	18.26	Primary	2	2	No	Yes	Yes	No	No	11.2	28.8	Non-neonatal complications	No	No	No	No
36175	1	19.95	Primary	1	2	No	Yes	No	Yes	No	11	32.4	Neonatal complications	Yes	Yes	No	No
36160	1	22.04	Secondary	2	1	Yes	No	No	No	No	9	31.5	Non-neonatal complications	No	No	No	No
36158	2	30.08	Primary	1	1	Yes	No	Yes	No	No	7.8	30.3	Non-neonatal complications	No	No	No	No
36137	3	18.22	Primary	1	1	Yes	No	Yes	No	No	8.3	27.3	Non-neonatal complications	No	No	No	No
36126	1	20.28	Secondary	1	2	Yes	No	No	No	No	9.5	29	Neonatal complications	No	Yes	No	No
36124	3	18.26	Primary	2	1	Yes	No	No	No	No	9	28.5	Non-neonatal complications	No	No	No	No
36120	2	18.37	Primary	2	2	Yes	Yes	No	No	No	8.5	25.9	Non-neonatal complications	No	No	No	No
36120	2	18.37	Primary	2	2	No	Yes	No	No	No	8.5	26	Non-neonatal complications	No	No	No	No
36112	2	18.43	Primary	1	2	Yes	No	Yes	No	No	11	31.6	Non-neonatal complications	No	No	No	No
36098	1	24.46	Secondary	2	2	No	Yes	No	No	No	8	32.9	Neonatal complications	No	No	No	Yes
36083	2	23.05	Primary	1	2	Yes	No	Yes	No	No	7	27.9	Non-neonatal complications	No	No	No	No
36061	2	22.04	Primary	2	1	Yes	No	Yes	No	No	10	26.4	Non-neonatal complications	No	No	No	No
36056	1	19.95	Secondary	1	1	Yes	No	No	No	No	9	30.2	Non-neonatal complications	No	No	No	No
36044	1	18.51	Primary	2	2	Yes	Yes	No	Yes	No	8	30.9	Neonatal complications	Yes	No	No	No
36042	3	20.7	Primary	2	1	Yes	No	Yes	No	No	8.2	26.6	Non-neonatal complications	No	No	No	No
36018	1	21.77	Primary	1	2	Yes	No	No	No	No	7.5	23.2	Non-neonatal complications	No	No	No	No
35993	1	19.47	Primary	1	1	Yes	No	No	No	No	8.5	33	Non-neonatal complications	No	No	No	No
35992	5	21.05	Primary	1	1	Yes	No	Yes	No	No	8.6	30.1	Non-neonatal complications	No	No	No	No
35983	1	21.48	Secondary	1	2	No	Yes	No	No	No	8.5	28.4	Neonatal complications	Yes	Yes	No	No
35965	3	28.69	Primary	1	2	Yes	No	No	No	No	9	28.2	Neonatal complications	No	Yes	No	No
35955	1	18.22	Secondary	2	2	Yes	Yes	No	No	No	8.6	26.8	Non-neonatal complications	No	No	No	No
35935	4	20.7	Primary	1	1	Yes	No	No	No	Yes	9.2	32.8	Non-neonatal complications	No	No	No	No
35918	3	17.4	Primary	1	1	Yes	No	No	No	No	11	31.2	Neonatal complications	No	No	Yes	No
35911	2	26.37	Secondary	2	1	Yes	No	No	No	No	9.1	35	Neonatal complications	No	No	No	Yes
35909	1	19.43	Secondary	1	1	Yes	No	No	No	No	10	28.2	Neonatal complications	No	No	Yes	No
35906	2	15.02	Primary	2	2	No	Yes	No	No	Yes	9	24.5	Neonatal complications	Yes	Yes	No	No
35884	1	18.36	Secondary	1	1	Yes	No	No	No	No	10.4	30	Non-neonatal complications	No	No	No	No
35877	5	23.88	Secondary	1	1	Yes	No	No	No	No	8.5	35	Neonatal complications	No	No	No	Yes
35795	2	20.2	Secondary	1	1	Yes	No	No	No	No	9.6	29.7	Non-neonatal complications	No	No	No	No
35782	7	17.97	Secondary	1	2	Yes	Yes	Yes	No	No	8.6	29.3	Non-neonatal complications	No	No	No	No
35735	5	20.8	Primary	1	1	Yes	No	No	No	No	7	29.2	Non-neonatal complications	No	No	No	No
35728	1	24.16	Primary	1	1	Yes	No	No	No	No	9.7	32.7	Non-neonatal complications	No	No	No	No
35723	2	20.2	Primary	1	2	Yes	Yes	No	No	No	10.3	24.3	Non-neonatal complications	No	No	No	No
35720	1	17.15	Primary	1	1	Yes	No	No	No	No	9	25.7	Neonatal complications	No	Yes	No	No
35698	2	21.23	Primary	1	2	Yes	Yes	No	No	No	10.3	30.7	Non-neonatal complications	No	No	No	No
35691	2	21.99	Primary	1	1	Yes	No	Yes	No	No	9.2	32.3	Non-neonatal complications	No	No	No	No
35687	2	23.12	Primary	2	2	Yes	Yes	No	No	No	9	32.8	Neonatal complications	Yes	Yes	No	No
35685	2	26.35	Primary	2	2	Yes	Yes	No	No	No	9	31.6	Non-neonatal complications	No	No	No	No
35675	3	23.94	Primary	1	1	Yes	No	Yes	No	No	7.3	30.7	Neonatal complications	No	Yes	No	No
35632	1	18.14	Primary	2	2	Yes	No	No	No	No	10.5	24.5	Non-neonatal complications	No	No	No	No
35578	3	17.99	Primary	1	1	Yes	No	No	No	No	9.5	29.1	Non-neonatal complications	No	No	No	No
35514	5	16.41	Primary	2	2	Yes	Yes	Yes	No	No	8.5	30.4	Neonatal complications	No	Yes	No	No
35511	5	18.67	Primary	1	1	Yes	No	No	No	No	9	30.6	Non-neonatal complications	No	No	No	No
35506	4	26.95	Primary	2	2	Yes	Yes	Yes	No	No	10	25.5	Non-neonatal complications	No	No	No	No
35491	3	21.77	Primary	2	2	Yes	Yes	No	No	No	12	31.2	Non-neonatal complications	No	No	No	No
35469	5	22.27	Secondary	2	2	Yes	Yes	No	No	No	8	33.6	Non-neonatal complications	No	No	No	No
35452	2	20.13	Primary	2	2	No	Yes	No	No	No	9	28.9	Non-neonatal complications	No	No	No	No
35450	5	29.97	Primary	1	1	No	Yes	Yes	No	No	9.2	29.2	Neonatal complications	No	No	No	Yes
35446	2	18.37	Primary	2	2	Yes	Yes	Yes	No	No	9	27.1	Non-neonatal complications	No	No	No	No
35436	4	26.04	Primary	1	2	Yes	No	No	No	No	10	31.2	Non-neonatal complications	No	No	No	No
35412	3	26.5	Primary	1	2	Yes	No	No	No	No	9.5	33.6	Non-neonatal complications	No	No	No	No
35408	3	17.15	Secondary	1	2	Yes	No	No	No	No	8.5	33	Neonatal complications	Yes	No	No	No
35396	7	18	Primary	1	2	Yes	Yes	Yes	No	No	9	26.5	Non-neonatal complications	No	No	No	No
35393	3	18.83	Primary	1	1	Yes	No	No	No	No	8	23.3	Non-neonatal complications	No	No	No	No
35377	1	24.46	Primary	1	2	Yes	No	No	No	No	11.3	26.2	Neonatal complications	Yes	Yes	No	No
35358	1	19.92	Secondary	2	2	No	Yes	No	No	No	10.5	25	Non-neonatal complications	No	No	No	No
35353	8	21.08	Primary	1	2	Yes	Yes	No	No	Yes	8.6	30.2	Non-neonatal complications	No	No	No	No
35347	4	20.2	Primary	1	1	Yes	No	No	No	No	8	31	Non-neonatal complications	No	No	No	No
35339	2	20.03	Secondary	2	2	No	Yes	No	No	No	8	28	Neonatal complications	No	No	No	Yes
35317	4	24.78	Primary	1	2	Yes	No	No	No	No	10	32.1	Non-neonatal complications	No	No	No	No
35304	1	22.89	Secondary	1	2	Yes	No	No	No	No	10	32.7	Non-neonatal complications	No	No	No	No
35288	2	19.14	Primary	2	2	Yes	No	No	No	No	9	31.9	Neonatal complications	No	No	No	Yes
35275	1	25.4	Primary	1	2	Yes	Yes	No	No	No	10.2	35	Neonatal complications	Yes	Yes	No	No
35263	3	19.81	Secondary	1	2	Yes	No	No	No	No	7	31.5	Non-neonatal complications	No	No	No	No
35243	5	26.77	Primary	2	2	No	Yes	No	No	No	12	30.4	Non-neonatal complications	Yes	No	No	No
35228	5	18.29	Primary	1	2	Yes	No	No	No	No	7	26.3	Neonatal complications	No	No	No	Yes
35224	3	25.22	Primary	2	2	Yes	Yes	Yes	No	No	12.1	29.6	Neonatal complications	No	No	No	Yes
35221	3	23.42	Secondary	2	2	No	Yes	No	No	No	9.5	29.8	Neonatal complications	Yes	Yes	No	No
35212	1	21.67	Primary	2	2	Yes	Yes	No	Yes	No	9.5	33.2	Non-neonatal complications	No	No	No	No
35200	5	21.08	Secondary	2	2	Yes	No	No	No	No	9.6	33.3	Non-neonatal complications	No	No	No	No
35198	1	16.45	Secondary	2	2	Yes	No	No	No	No	7.6	27.7	Non-neonatal complications	No	No	No	No
35192	2	23.63	Primary	1	2	Yes	No	Yes	No	No	12.5	27.2	Neonatal complications	No	Yes	No	No
35178	2	19.83	Primary	1	1	Yes	No	No	No	No	13	26.8	Non-neonatal complications	No	No	No	No
35168	3	25.64	Primary	1	1	Yes	No	No	No	No	9.7	31.2	Non-neonatal complications	No	No	No	No
35167	4	23.53	Primary	2	2	Yes	Yes	No	No	No	14	26.2	Neonatal complications	No	Yes	No	No
35146	3	22.66	Secondary	1	2	No	Yes	No	No	No	9	30.5	Neonatal complications	Yes	Yes	No	No
35142	2	20.4	Secondary	1	1	Yes	No	No	No	No	10.4	29.9	Non-neonatal complications	No	No	No	No
35110	2	20.2	Primary	1	1	Yes	No	Yes	No	No	11.9	26.6	Non-neonatal complications	No	No	No	No
35081	2	18.29	Primary	2	1	Yes	No	Yes	No	No	10	30.8	Non-neonatal complications	No	No	No	No
35060	2	21.64	Secondary	2	2	Yes	Yes	No	No	No	8.5	30	Neonatal complications	Yes	Yes	No	No
35040	1	18.75	Secondary	2	2	Yes	No	No	No	No	8	30.1	Neonatal complications	Yes	Yes	No	No
35038	6	19.02	Primary	1	2	Yes	No	No	No	No	8	28.4	Neonatal complications	Yes	Yes	No	No
35026	3	18.36	Primary	1	1	Yes	No	Yes	No	No	8.4	32.1	Non-neonatal complications	No	No	No	No
35006	4	24.77	Primary	2	2	Yes	Yes	No	No	No	9	33.9	Neonatal complications	Yes	Yes	No	No
34999	1	17.22	Secondary	2	2	Yes	Yes	No	No	No	7.3	24.4	Non-neonatal complications	No	No	No	No
34981	1	20.83	Secondary	2	2	Yes	Yes	No	No	Yes	8.6	33.8	Non-neonatal complications	No	No	No	No
34971	2	23.51	Primary	2	2	No	Yes	No	No	No	8.8	29.1	Non-neonatal complications	No	No	No	No
34940	5	22.27	Secondary	2	2	Yes	No	No	No	No	10.8	31	Non-neonatal complications	No	No	No	No
34923	2	24.14	Primary	2	2	Yes	Yes	No	No	No	9	28.8	Non-neonatal complications	No	No	No	No
34898	3	25	Primary	1	1	Yes	No	Yes	No	No	9.8	28.4	Non-neonatal complications	No	No	No	No
34891	1	23.15	Secondary	1	2	Yes	No	No	No	No	8.9	32.4	Non-neonatal complications	No	No	No	No
34890	3	17.91	Primary	1	1	Yes	No	Yes	No	No	9	29.6	Non-neonatal complications	No	No	No	No
34868	5	18.82	Primary	1	1	Yes	No	No	No	No	7.2	33.9	Non-neonatal complications	No	No	No	No
34859	1	17.47	Primary	2	2	No	Yes	No	No	No	8.5	25.5	Non-neonatal complications	No	No	No	No
34846	1	21.33	Primary	1	1	Yes	No	No	Yes	No	13.3	27.4	Non-neonatal complications	No	No	No	No
34807	2	22.05	Primary	1	2	Yes	Yes	No	No	No	7.5	27.9	Non-neonatal complications	No	No	No	No
34798	3	23.51	Primary	1	1	Yes	No	Yes	No	No	10	25.1	Non-neonatal complications	No	No	No	No
34786	1	20.03	Primary	1	1	Yes	No	No	No	No	12	32.4	Non-neonatal complications	No	No	No	No
34784	5	19.25	Primary	2	2	Yes	Yes	No	No	No	10	32.1	Non-neonatal complications	No	No	No	No
34772	2	22.83	Secondary	2	2	Yes	Yes	No	No	No	7.5	32.9	Non-neonatal complications	No	No	No	No
34765	4	19.07	Secondary	2	2	Yes	Yes	No	No	No	7	34.4	Non-neonatal complications	No	No	No	No
34763	9	22.83	Secondary	1	2	Yes	Yes	No	No	No	11	32.3	Neonatal complications	Yes	Yes	No	No
34723	2	18.93	Primary	1	1	Yes	No	Yes	No	No	12	28	Non-neonatal complications	No	No	No	No
34681	1	22.2	Secondary	2	2	Yes	Yes	No	No	No	7.5	26.4	Non-neonatal complications	No	No	No	No
34663	2	19.15	Secondary	2	2	No	Yes	No	No	No	9.5	34	Neonatal complications	Yes	Yes	No	No
34631	2	22.27	Secondary	2	2	Yes	Yes	No	No	No	11	26.5	Neonatal complications	Yes	Yes	No	No
34624	2	21.8	Primary	2	1	Yes	No	No	No	Yes	10.3	31.1	Non-neonatal complications	No	No	No	No
34582	1	25.22	Secondary	2	2	Yes	Yes	No	No	No	7	35	Neonatal complications	No	No	Yes	No
34564	7	22.04	Secondary	1	2	Yes	Yes	No	No	No	8.5	31.4	Non-neonatal complications	No	No	No	No
34563	5	20.08	Primary	1	2	Yes	No	No	No	No	9.2	32.3	Neonatal complications	No	Yes	No	No
34542	4	19.68	Secondary	1	2	Yes	Yes	No	No	No	10	35	Non-neonatal complications	No	No	No	No
34530	2	17.71	Primary	1	1	Yes	No	No	No	No	8	30.7	Non-neonatal complications	No	No	No	No
34509	4	20.2	Secondary	2	2	Yes	Yes	No	No	No	11	27.7	Non-neonatal complications	No	No	No	No
34458	3	18.82	Primary	1	2	Yes	Yes	No	No	Yes	11	27.3	Non-neonatal complications	No	No	No	No
34452	4	19.56	Secondary	2	2	No	Yes	No	No	No	7.5	29.5	Neonatal complications	Yes	Yes	No	No
34406	3	19.14	Primary	2	2	Yes	Yes	No	No	No	9	28.7	Neonatal complications	No	Yes	No	No
34397	5	19.56	Primary	2	2	Yes	No	No	No	No	10	33.5	Non-neonatal complications	No	No	No	No
34389	4	19.83	Secondary	2	2	Yes	No	No	No	No	8	30.8	Non-neonatal complications	No	No	No	No
34379	3	17.06	Primary	1	2	No	Yes	No	No	No	9.7	28.8	Non-neonatal complications	No	No	No	No
34370	6	18.73	Primary	2	2	Yes	Yes	No	No	No	12	29.2	Neonatal complications	Yes	No	No	No
34353	1	18.73	Secondary	2	2	Yes	No	No	No	No	8.5	30.7	Non-neonatal complications	No	No	No	No
34348	1	19.81	Secondary	2	2	Yes	No	Yes	No	No	8	33.7	Neonatal complications	Yes	Yes	No	No
34341	3	17.97	Secondary	2	2	Yes	No	No	No	No	10	30.3	Neonatal complications	Yes	Yes	No	No
34332	6	28.37	Primary	1	2	Yes	Yes	No	No	No	9.2	31.2	Non-neonatal complications	No	No	No	No
34323	4	22.04	Secondary	2	2	Yes	No	No	No	No	9	33.1	Neonatal complications	No	No	Yes	No
34321	1	21.64	Secondary	2	2	Yes	Yes	No	No	No	7.5	34.6	Non-neonatal complications	No	No	No	No
34311	2	19.81	Primary	1	2	Yes	Yes	No	No	No	9.2	27.5	Non-neonatal complications	No	No	No	No
34287	4	18.73	Primary	1	2	Yes	No	No	No	No	9.4	29.4	Neonatal complications	No	No	Yes	No
34254	1	22.27	Secondary	1	2	Yes	Yes	No	No	No	8	25.1	Neonatal complications	Yes	Yes	No	No
34237	5	17.58	Primary	1	2	Yes	Yes	No	No	No	11	30.2	Non-neonatal complications	No	No	No	No
34228	3	18.36	Primary	1	1	Yes	No	Yes	No	No	11	28.1	Non-neonatal complications	No	No	No	No
34220	3	26.04	Primary	2	2	Yes	No	No	No	No	9	25.3	Non-neonatal complications	No	No	No	No
34209	4	20.83	Primary	2	2	Yes	Yes	No	No	No	7.8	25.9	Non-neonatal complications	No	No	No	No
34198	3	28.84	Secondary	1	2	Yes	Yes	No	No	No	10.2	27.8	Non-neonatal complications	No	No	No	No
34196	7	25.63	Secondary	2	1	No	Yes	Yes	No	No	8	27.8	Non-neonatal complications	No	No	No	No
34183	1	22.31	Secondary	2	2	Yes	No	No	No	No	7	32.2	Neonatal complications	Yes	Yes	No	No
34165	1	21.63	Secondary	2	2	Yes	Yes	No	Yes	No	9	31.5	Non-neonatal complications	No	No	No	No
34159	2	24.2	Secondary	2	1	Yes	No	No	No	No	8.6	31.1	Non-neonatal complications	No	No	No	No
34114	14	21.64	Secondary	1	2	No	Yes	No	No	No	12	25.5	Neonatal complications	Yes	Yes	No	No
34109	2	21.48	Primary	2	2	Yes	No	No	No	No	10	35	Non-neonatal complications	No	No	No	No
34108	6	19.92	Primary	1	1	Yes	No	No	No	No	7.5	34.1	Non-neonatal complications	No	No	No	No
34079	1	21.48	Secondary	1	1	Yes	No	No	No	No	8.4	30.6	Neonatal complications	No	No	No	Yes
34073	1	17.9	Secondary	2	2	Yes	Yes	No	No	No	8	35	Neonatal complications	No	Yes	No	No
34070	6	21.88	Primary	2	2	No	Yes	No	No	No	11	25.5	Non-neonatal complications	No	No	No	No
34062	3	18.03	Primary	2	2	Yes	Yes	No	No	No	9	33	Non-neonatal complications	No	No	No	No
34003	1	23.05	Primary	1	2	No	Yes	No	No	No	8	33.3	Non-neonatal complications	No	No	No	No
33991	6	26.56	Primary	1	2	No	Yes	Yes	No	No	10	31	Non-neonatal complications	No	No	No	No
33980	1	19.81	Secondary	2	2	Yes	Yes	No	No	No	13	34.1	Non-neonatal complications	No	No	No	No
33970	3	21.5	Primary	2	2	Yes	No	No	No	No	13	27.2	Non-neonatal complications	No	No	No	No
33955	4	19.56	Secondary	2	2	Yes	No	No	No	No	10	24.4	Non-neonatal complications	No	No	No	No
33924	1	23.83	Secondary	1	1	Yes	No	No	No	No	9	32.7	Neonatal complications	Yes	Yes	No	No
33922	5	20.96	Primary	1	2	Yes	No	No	No	No	7	27.3	Non-neonatal complications	No	No	No	No
33916	2	21.48	Secondary	2	1	Yes	No	No	No	No	9	35	Non-neonatal complications	No	No	No	No
33905	1	18.37	Secondary	1	2	No	Yes	No	No	No	11	32.6	Non-neonatal complications	No	No	No	No
33889	1	23.31	Secondary	2	2	No	Yes	Yes	No	No	8	28.7	Non-neonatal complications	No	No	No	No
33876	7	15.63	Primary	2	2	Yes	Yes	No	No	No	7.3	27.8	Non-neonatal complications	No	No	No	No
33873	8	18.75	Primary	1	2	Yes	No	No	No	No	12	30.9	Neonatal complications	No	No	No	Yes
33861	4	26.64	Secondary	1	1	Yes	No	No	No	Yes	8.3	29.7	Non-neonatal complications	No	No	No	No
33853	2	27.64	Primary	1	2	Yes	No	No	No	No	12	27.1	Non-neonatal complications	No	No	No	No
33851	2	19.81	Primary	1	2	Yes	Yes	No	No	No	9	32.8	Non-neonatal complications	No	No	No	No
33847	1	23.62	Secondary	2	2	No	Yes	Yes	No	No	9.1	32.2	Non-neonatal complications	No	No	No	No
33771	4	21.48	Primary	1	1	Yes	No	No	No	No	7	24	Non-neonatal complications	No	No	No	No
33758	13	25.34	Secondary	2	2	No	Yes	No	No	No	8.7	35.6	Neonatal complications	No	No	No	Yes
33754	3	20.5	Secondary	1	2	No	Yes	No	No	No	9.2	25.8	Non-neonatal complications	No	No	No	No
33732	4	20.2	Secondary	1	1	Yes	No	No	No	Yes	8.7	28.9	Non-neonatal complications	No	No	No	No
33727	7	18.22	Primary	1	2	Yes	Yes	No	No	No	8.4	31.2	Non-neonatal complications	No	No	No	No
33721	3	19.98	Secondary	1	2	Yes	No	No	No	No	11	33.8	Non-neonatal complications	No	No	No	No
33712	2	22.49	Secondary	1	1	Yes	No	No	No	No	10	26.3	Non-neonatal complications	No	No	No	No
33703	2	26.35	Primary	2	2	No	Yes	No	No	No	12	27.6	Non-neonatal complications	No	No	No	No
33678	6	30.08	Secondary	2	1	Yes	No	No	No	No	8.5	27.8	Non-neonatal complications	No	No	No	No
33674	7	18.67	Primary	1	2	Yes	No	No	No	No	11	29.1	Non-neonatal complications	No	No	No	No
33672	5	20.31	Primary	1	2	Yes	Yes	No	Yes	No	11.7	27.7	Neonatal complications	Yes	Yes	No	No
33666	3	18.31	Primary	2	2	Yes	Yes	No	No	No	9	33.5	Non-neonatal complications	No	No	No	No
33657	2	19.07	Primary	2	2	Yes	Yes	No	No	No	7	31.4	Non-neonatal complications	No	No	No	No
33634	1	21.48	Secondary	1	2	Yes	Yes	No	No	No	7	30.6	Non-neonatal complications	No	No	No	No
33632	1	21.56	Primary	1	1	Yes	No	No	No	No	7.5	27.5	Non-neonatal complications	No	No	No	No
33624	7	27.06	Secondary	2	2	Yes	Yes	No	No	No	9.2	33.8	Non-neonatal complications	No	No	No	No
33618	4	23.81	Primary	2	2	No	Yes	No	No	No	7.9	31.8	Neonatal complications	Yes	Yes	No	No
33616	4	19.33	Secondary	1	1	Yes	No	No	No	No	9	31.5	Non-neonatal complications	No	No	No	No
33608	7	20	Secondary	2	2	Yes	Yes	No	No	No	9.5	34.7	Neonatal complications	Yes	No	No	No
33605	2	28.13	Secondary	2	1	No	Yes	No	No	No	9	29.3	Non-neonatal complications	No	No	No	No
33603	9	25.22	Secondary	1	2	Yes	Yes	Yes	No	No	11	31	Non-neonatal complications	No	No	No	No
33591	1	19.78	Secondary	2	2	Yes	No	No	No	No	9	32.9	Neonatal complications	Yes	Yes	No	No
33555	3	19.72	Primary	1	1	No	Yes	No	No	No	8.2	24.8	Non-neonatal complications	No	No	No	No
33533	1	20.96	Secondary	1	1	Yes	No	No	No	No	7.8	34.2	Non-neonatal complications	No	No	No	No
33532	1	18.75	Secondary	1	1	Yes	No	No	No	No	9	30.5	Neonatal complications	No	No	No	Yes
33499	8	22.48	Primary	1	1	Yes	No	No	No	Yes	10	32.9	Non-neonatal complications	No	No	No	No
33497	8	21.23	Primary	2	2	Yes	Yes	No	No	Yes	10	29.1	Neonatal complications	No	Yes	No	No
33495	3	24.14	Secondary	1	2	No	Yes	No	No	No	10	28.3	Non-neonatal complications	No	No	No	No
33481	2	17.58	Secondary	1	1	Yes	No	No	No	No	7.5	29.5	Non-neonatal complications	No	No	No	No
33469	6	28.44	Primary	1	1	Yes	No	No	No	No	10	27.8	Non-neonatal complications	No	No	No	No
33465	1	21.45	Secondary	1	1	Yes	No	No	No	No	9.2	25.3	Non-neonatal complications	No	No	No	No
33463	3	20.55	Primary	1	1	Yes	No	No	No	No	7	34.4	Non-neonatal complications	No	No	No	No
33454	3	22.49	Secondary	2	2	Yes	No	No	No	No	8	24.3	Non-neonatal complications	No	No	No	No
33452	3	31.25	Primary	1	1	Yes	No	No	No	No	11	22.9	Neonatal complications	No	No	No	Yes
33448	2	17.31	Primary	2	2	Yes	No	No	Yes	No	9.8	34.7	Neonatal complications	Yes	Yes	No	No
33440	2	19.14	Primary	1	2	Yes	Yes	No	No	No	8.9	29.1	Non-neonatal complications	No	No	No	No
33438	3	19.14	Primary	1	2	No	Yes	Yes	No	No	8.7	26.2	Non-neonatal complications	No	No	No	No
33434	1	20.94	Secondary	1	1	Yes	No	No	No	No	7.6	28.8	Non-neonatal complications	No	No	No	No
33422	2	22.58	Secondary	1	1	Yes	No	No	No	No	8.8	32.3	Neonatal complications	Yes	Yes	No	No
33416	5	28.84	Primary	1	1	Yes	No	No	No	No	8.5	28.9	Non-neonatal complications	No	No	No	No
33410	2	20.34	Primary	1	2	No	Yes	No	No	No	10.2	26.6	Non-neonatal complications	No	No	No	No
33397	3	19.56	Secondary	2	2	Yes	No	No	No	No	7	33.4	Neonatal complications	Yes	Yes	No	No
33392	2	21.26	Primary	1	2	Yes	No	No	No	Yes	7	29.3	Non-neonatal complications	No	No	No	No
33386	1	22.05	Secondary	2	1	Yes	No	No	No	No	8.5	35	Non-neonatal complications	No	No	No	No
33355	1	20.55	Secondary	1	2	No	Yes	No	No	No	7.9	27.6	Non-neonatal complications	Yes	No	No	No
33352	1	18.13	Primary	1	2	Yes	Yes	No	No	Yes	8	30.9	Neonatal complications	No	Yes	No	No
33348	6	20.44	Secondary	1	1	No	Yes	No	No	No	8.2	34.9	Neonatal complications	No	No	No	Yes
33344	2	21.64	Primary	1	1	Yes	No	No	No	No	8.3	28.6	Non-neonatal complications	No	No	No	No
33334	2	21.88	Secondary	2	2	Yes	Yes	No	No	No	8	30.1	Neonatal complications	No	Yes	No	No
33325	3	24.97	Primary	1	2	Yes	Yes	Yes	No	No	10	29.1	Non-neonatal complications	No	No	No	No
33321	2	16.82	Secondary	1	1	Yes	No	No	No	No	8	30.2	Non-neonatal complications	No	No	No	No
33308	3	20.28	Primary	1	1	Yes	No	No	No	No	12	26.8	Non-neonatal complications	No	No	No	No
33296	9	29.33	Primary	2	2	Yes	Yes	No	No	No	8	35	Non-neonatal complications	No	No	No	No
33281	1	22.89	Secondary	1	1	Yes	No	No	No	No	7.5	31.5	Neonatal complications	No	No	No	Yes
33281	1	22.89	Secondary	2	2	Yes	No	No	No	No	7.5	31.7	Neonatal complications	No	No	No	Yes
33275	6	27.48	Primary	2	2	Yes	No	No	No	No	9.5	30.2	Neonatal complications	No	No	No	Yes
33260	5	23.44	Primary	1	1	Yes	No	No	No	No	9.8	32.3	Neonatal complications	No	No	No	Yes
33254	5	22.04	Secondary	1	1	Yes	No	No	No	No	11	30.7	Non-neonatal complications	No	No	No	No
33251	3	20.28	Primary	2	2	Yes	Yes	No	No	No	10	28	Non-neonatal complications	No	No	No	No
33233	3	26.67	Secondary	1	2	Yes	No	No	No	No	9.3	27.3	Neonatal complications	No	No	No	Yes
33207	5	29.3	Secondary	1	1	Yes	No	No	No	No	10	25.8	Neonatal complications	No	No	No	Yes
33200	2	19.38	Primary	1	2	No	Yes	No	No	No	10.7	25.8	Non-neonatal complications	No	No	No	No
33178	1	18.67	Secondary	1	1	No	Yes	No	No	No	7.5	30.4	Non-neonatal complications	No	No	No	No
33154	3	20.44	Secondary	2	2	No	Yes	No	No	Yes	9	22.2	Non-neonatal complications	Yes	No	No	No
33144	1	21.48	Secondary	1	1	Yes	No	No	No	No	10.6	30.6	Non-neonatal complications	No	No	No	No
33130	3	22.58	Primary	1	1	Yes	No	Yes	No	No	10	26.7	Non-neonatal complications	No	No	No	No
33127	1	19.47	Secondary	1	2	No	Yes	No	No	No	8	30.8	Non-neonatal complications	No	No	No	No
33123	7	26.95	Primary	2	2	Yes	Yes	No	No	No	12	31.7	Non-neonatal complications	No	No	No	No
33119	2	22.66	Secondary	2	2	Yes	No	Yes	No	No	8	33	Non-neonatal complications	No	No	No	No
33104	5	23.44	Primary	1	1	Yes	No	No	No	No	8	33.1	Neonatal complications	No	No	No	Yes
33102	6	21.23	Primary	2	2	No	Yes	No	No	No	8	25.4	Neonatal complications	No	No	No	Yes
33097	4	21.91	Primary	2	2	No	Yes	No	No	No	11.2	30.4	Non-neonatal complications	No	No	No	No
33092	7	17.71	Primary	1	1	Yes	No	Yes	No	No	10.8	30.8	Non-neonatal complications	No	No	No	No
33087	2	18.07	Secondary	2	2	Yes	Yes	No	No	No	8	32.1	Non-neonatal complications	No	No	No	No
33080	1	26.04	Secondary	1	1	Yes	No	No	No	No	9.2	29.1	Neonatal complications	Yes	Yes	No	No
33073	3	22.21	Primary	1	1	Yes	No	Yes	No	No	11	28.3	Non-neonatal complications	No	No	No	No
33045	3	18.25	Primary	2	1	No	Yes	Yes	No	No	7.5	31.3	Non-neonatal complications	No	No	No	No
33042	2	17.93	Secondary	2	2	Yes	Yes	No	No	No	8	30.6	Non-neonatal complications	No	No	No	No
33041	3	25.64	Secondary	2	2	Yes	Yes	No	No	No	8.1	26.2	Non-neonatal complications	No	No	No	No
33028	2	26.91	Primary	1	1	Yes	No	No	No	No	8	27.2	Neonatal complications	Yes	No	No	No
33027	1	19.14	Secondary	2	2	Yes	Yes	No	No	No	7.5	29.3	Neonatal complications	Yes	Yes	No	No
33023	3	19.65	Primary	1	1	Yes	No	No	No	No	8	22	Non-neonatal complications	No	No	No	No
33010	4	24.68	Primary	2	2	No	Yes	Yes	No	No	10.5	30	Non-neonatal complications	No	No	No	No
33009	3	17.63	Primary	1	1	Yes	No	No	No	No	7	27.1	Non-neonatal complications	No	No	No	No
32991	5	20.7	Secondary	2	2	Yes	Yes	No	No	No	8.5	32.3	Non-neonatal complications	No	No	No	No
32984	1	24.67	Primary	1	2	Yes	No	No	No	No	9.5	29.4	Neonatal complications	No	Yes	No	No
32975	5	23.23	Secondary	2	2	No	Yes	No	No	No	9.5	32	Neonatal complications	Yes	Yes	No	No
32973	2	21.94	Primary	2	2	No	Yes	No	No	No	9.5	30.9	Non-neonatal complications	Yes	No	No	No
32963	4	20.7	Primary	1	1	Yes	No	No	No	No	8.5	29.1	Non-neonatal complications	No	No	No	No
32955	1	20.2	Secondary	2	2	Yes	Yes	No	No	No	11	30.5	Non-neonatal complications	No	No	No	No
32950	1	23.03	Secondary	2	2	Yes	No	No	No	No	11	29.2	Non-neonatal complications	No	No	No	No
32937	5	19.53	Secondary	2	2	Yes	Yes	No	No	No	8	35	Neonatal complications	Yes	Yes	No	No
32912	5	19.2	Secondary	2	2	Yes	Yes	No	No	No	9	35	Neonatal complications	Yes	No	No	No
32904	2	16	Secondary	1	1	Yes	No	No	No	No	7.3	25.2	Non-neonatal complications	No	No	No	No
32887	3	21.07	Primary	1	1	Yes	No	No	No	No	7	30	Neonatal complications	No	No	No	Yes
32850	5	18.59	Secondary	1	1	Yes	No	No	No	No	7.8	23.7	Non-neonatal complications	No	No	No	No
32842	5	20.03	Secondary	1	1	Yes	No	No	No	No	11	30.4	Non-neonatal complications	No	No	No	No
32836	1	24.34	Secondary	1	1	Yes	No	Yes	No	No	10	34.8	Non-neonatal complications	No	No	No	No
32833	1	24.44	Secondary	1	1	Yes	No	No	No	Yes	9	35	Non-neonatal complications	No	No	No	No
32811	1	24.44	Secondary	2	2	No	Yes	No	No	No	9.8	33.8	Neonatal complications	No	Yes	No	No
32809	5	19.57	Primary	1	1	No	Yes	No	No	No	8.8	31.6	Neonatal complications	Yes	Yes	No	No
32782	2	24.14	Secondary	2	2	No	Yes	No	No	No	10.1	35.1	Non-neonatal complications	No	No	No	No
32774	4	19.65	Primary	1	2	Yes	Yes	No	No	No	11.2	30.1	Neonatal complications	No	No	No	Yes
32772	7	22.89	Primary	2	2	Yes	Yes	No	No	No	7.5	25	Neonatal complications	No	No	No	Yes
32764	2	19.53	Primary	2	2	Yes	Yes	No	No	No	7	33.6	Non-neonatal complications	No	No	No	No
32737	3	19.2	Primary	1	1	Yes	No	Yes	No	No	10.4	26.3	Non-neonatal complications	No	No	No	No
32723	3	20.78	Secondary	1	2	Yes	Yes	No	No	No	8.3	31.4	Non-neonatal complications	No	No	No	No
32720	4	25	Secondary	1	1	Yes	No	Yes	No	No	7.2	27.4	Non-neonatal complications	No	No	No	No
32687	3	21.78	Secondary	2	2	Yes	Yes	No	No	No	10.4	30.7	Non-neonatal complications	No	No	No	No
32648	9	23.11	Primary	2	2	Yes	Yes	No	No	No	9	32.5	Neonatal complications	Yes	Yes	No	No
32646	4	23.44	Primary	2	2	Yes	No	No	No	No	11	31.1	Non-neonatal complications	No	No	No	No
32634	3	18.37	Primary	1	1	Yes	No	Yes	No	No	8	28	Neonatal complications	No	No	No	Yes
32618	1	20.03	Primary	1	1	Yes	No	Yes	No	No	8.6	30.8	Neonatal complications	No	No	No	Yes
32594	3	20.03	Secondary	2	2	Yes	Yes	No	No	No	10.4	34.3	Non-neonatal complications	No	No	No	No
32580	2	22.22	Secondary	2	2	No	Yes	Yes	No	No	9.8	31.4	Non-neonatal complications	No	No	No	No
32571	1	18.59	Secondary	1	1	Yes	No	No	No	No	8	34.2	Non-neonatal complications	No	No	No	No
32566	2	18.59	Secondary	2	2	Yes	Yes	No	No	No	10	30.4	Neonatal complications	Yes	Yes	No	No
32550	4	21.5	Primary	2	2	Yes	Yes	No	No	No	7.5	26.6	Non-neonatal complications	No	No	No	No
32540	3	20.13	Secondary	1	1	Yes	No	No	No	No	10.8	34.2	Non-neonatal complications	No	No	No	No
32531	2	16.02	Secondary	1	1	Yes	No	No	No	No	8.5	30.4	Non-neonatal complications	No	No	No	No
32519	1	18.37	Primary	1	1	Yes	No	Yes	No	No	11.2	30.5	Non-neonatal complications	No	No	No	No
32514	4	20.72	Primary	1	1	Yes	No	No	No	No	9.8	25.8	Non-neonatal complications	No	No	No	No
32506	1	29.14	Primary	1	1	Yes	No	Yes	No	No	9.4	25.1	Neonatal complications	Yes	Yes	No	No
32500	2	17.69	Primary	1	2	Yes	Yes	No	No	No	8	25.8	Non-neonatal complications	No	No	No	No
32488	4	20.89	Secondary	1	2	No	Yes	No	No	No	7.7	35.1	Non-neonatal complications	No	No	No	No
32463	6	17.99	Primary	1	2	Yes	No	No	No	No	7.6	35	Non-neonatal complications	No	No	No	No
32461	2	21.23	Secondary	1	2	Yes	Yes	No	No	No	8.4	24.7	Neonatal complications	Yes	No	No	No
32438	7	27.56	Primary	1	1	Yes	No	No	No	No	10.6	25.2	Non-neonatal complications	No	No	No	No
32427	4	21.08	Primary	1	1	Yes	No	Yes	No	No	10	28.5	Non-neonatal complications	No	No	No	No
32393	2	21.09	Secondary	2	2	Yes	Yes	No	No	Yes	9.5	30.5	Non-neonatal complications	No	No	No	No
32382	5	23.14	Primary	2	2	No	Yes	No	No	No	7.8	26.6	Neonatal complications	No	Yes	No	No
32365	1	18.67	Secondary	1	1	Yes	No	No	No	No	7.1	30.5	Non-neonatal complications	No	No	No	No
32344	4	21.64	Primary	2	2	No	Yes	No	No	No	9	23.6	Non-neonatal complications	No	No	No	No
32342	2	23.44	Secondary	2	2	Yes	No	No	No	No	9.3	26.8	Neonatal complications	No	Yes	No	No
32333	1	18.18	Primary	1	1	Yes	No	No	No	No	8.3	27.4	Non-neonatal complications	No	No	No	No
32323	3	22.03	Secondary	2	2	No	Yes	No	No	No	11.6	31	Neonatal complications	No	No	No	Yes
32322	4	24.84	Secondary	2	1	Yes	No	No	No	No	9	29.7	Neonatal complications	Yes	No	No	No
32317	3	26.49	Primary	1	1	Yes	No	Yes	No	No	8.5	30.1	Non-neonatal complications	No	No	No	No
32307	3	23.63	Secondary	2	2	Yes	Yes	No	No	No	9	33.3	Non-neonatal complications	No	No	No	No
32272	2	25.39	Secondary	1	1	Yes	No	No	No	No	8	23.1	Non-neonatal complications	No	No	No	No
32259	6	18.65	Primary	1	2	Yes	Yes	No	No	No	8.5	29	Non-neonatal complications	No	No	No	No
32254	3	27.18	Primary	2	1	Yes	No	No	No	Yes	9.4	34.6	Non-neonatal complications	No	No	No	No
32248	3	22.43	Primary	1	1	Yes	No	Yes	No	No	11	26.9	Neonatal complications	Yes	Yes	No	No
32243	1	27.34	Secondary	1	2	Yes	Yes	No	No	No	9.4	27.6	Neonatal complications	No	No	No	Yes
32237	2	19.43	Primary	1	1	Yes	No	No	No	No	8.5	29	Non-neonatal complications	No	No	No	No
32228	1	20.2	Secondary	2	2	Yes	Yes	No	No	No	8.4	35	Non-neonatal complications	No	No	No	No
32226	2	22.89	Secondary	2	2	Yes	No	No	No	No	8	29.4	Non-neonatal complications	No	No	No	No
32223	2	19.1	Primary	2	2	No	Yes	No	No	No	7.8	29.3	Non-neonatal complications	No	No	No	No
32197	4	22.31	Primary	1	2	Yes	No	Yes	No	No	10.5	26.7	Non-neonatal complications	No	No	No	No
32194	2	26.04	Primary	1	1	Yes	No	Yes	No	No	9.7	30.4	Non-neonatal complications	No	No	No	No
32148	1	22.31	Primary	1	2	No	Yes	No	No	No	7.3	30.5	Non-neonatal complications	No	No	No	No
32147	2	19.2	Secondary	2	1	Yes	No	No	No	Yes	10	30.1	Non-neonatal complications	No	No	No	No
32143	1	25.24	Secondary	2	2	No	Yes	No	No	No	7.5	35.6	Non-neonatal complications	No	No	No	No
32139	1	19.29	Secondary	1	2	Yes	No	No	No	No	9	35	Neonatal complications	Yes	Yes	No	No
32129	3	21.91	Secondary	2	1	Yes	No	No	No	No	8	31.5	Non-neonatal complications	No	No	No	No
32118	5	32.01	Secondary	1	1	Yes	No	No	No	No	9.5	27.2	Neonatal complications	Yes	Yes	No	No
32115	2	17.01	Secondary	2	2	Yes	Yes	No	No	No	11.1	28.4	Non-neonatal complications	No	No	No	No
32102	2	22.03	Secondary	2	2	Yes	No	No	No	No	7	32.9	Neonatal complications	No	Yes	No	No
32094	1	22.15	Secondary	1	1	Yes	No	No	No	No	7.9	33.2	Non-neonatal complications	No	No	No	No
32082	3	18.75	Primary	1	2	Yes	Yes	No	No	No	9	32.1	Non-neonatal complications	No	No	No	No
32079	5	20.94	Primary	2	2	Yes	Yes	Yes	No	No	9.7	27	Neonatal complications	Yes	Yes	No	No
32063	1	22.06	Secondary	1	2	No	Yes	No	No	No	8	29.5	Neonatal complications	Yes	Yes	No	No
32056	1	21.76	Secondary	2	2	No	Yes	No	No	No	7.5	33.2	Non-neonatal complications	No	No	No	No
32035	2	18.67	Secondary	1	1	Yes	No	No	No	No	9.1	29.8	Non-neonatal complications	No	No	No	No
32033	1	18.82	Primary	1	2	Yes	No	No	No	No	9	31	Non-neonatal complications	No	No	No	No
32031	1	20.03	Secondary	1	2	Yes	Yes	No	No	No	9.8	28.3	Non-neonatal complications	No	No	No	No
32030	6	24.8	Primary	1	1	Yes	No	No	No	Yes	14.9	30.3	Non-neonatal complications	No	No	No	No
32020	5	25.1	Primary	1	1	Yes	No	No	No	No	9.2	28.8	Neonatal complications	Yes	Yes	No	No
32012	4	19.14	Primary	1	2	Yes	No	No	No	Yes	8.8	25.1	Non-neonatal complications	No	No	No	No
32010	4	25	Secondary	2	2	No	Yes	No	No	No	9	23.9	Neonatal complications	No	Yes	No	No
32007	1	20.94	Secondary	2	1	Yes	No	No	No	No	7.6	24.1	Neonatal complications	No	No	No	Yes
31996	2	20.43	Primary	1	2	Yes	Yes	Yes	No	No	8.5	28	Neonatal complications	Yes	Yes	No	No
31973	1	21.41	Secondary	1	1	Yes	No	No	No	No	7.5	27.7	Non-neonatal complications	No	No	No	No
31955	4	17.3	Primary	2	2	No	Yes	Yes	No	No	8.4	32.5	Non-neonatal complications	No	No	No	No
31948	10	20.81	Primary	2	2	Yes	No	No	No	No	7.2	34.4	Neonatal complications	Yes	Yes	No	No
31938	5	19.53	Secondary	2	1	Yes	No	No	No	No	7	29.6	Non-neonatal complications	No	No	No	No
31937	4	30.85	Secondary	1	1	Yes	No	Yes	No	No	11.4	28.8	Non-neonatal complications	No	No	No	No
31926	5	20.5	Primary	2	1	Yes	No	No	No	No	11	24.9	Non-neonatal complications	No	No	No	No
31917	3	22.31	Secondary	2	1	Yes	No	No	No	No	8.5	33.8	Non-neonatal complications	No	No	No	No
31912	1	21.45	Primary	1	2	Yes	Yes	No	No	No	10.7	26.6	Non-neonatal complications	No	No	No	No
31908	3	21.23	Secondary	2	2	Yes	No	No	No	Yes	7.8	32.5	Non-neonatal complications	No	No	No	No
31904	5	21.22	Primary	2	2	Yes	Yes	No	No	No	8.2	31.2	Non-neonatal complications	No	No	No	No
31902	2	17.36	Secondary	2	2	Yes	Yes	No	No	No	7	33.3	Non-neonatal complications	No	No	No	No
31896	2	20.57	Secondary	1	1	Yes	No	No	No	No	7.8	32.9	Non-neonatal complications	No	No	No	No
31884	2	20.31	Primary	2	1	Yes	No	No	No	No	9.6	24.2	Non-neonatal complications	No	No	No	No
31883	5	20.44	Primary	1	1	Yes	No	Yes	No	No	9	31.3	Non-neonatal complications	No	No	No	No
31874	1	24.34	Secondary	1	2	No	Yes	Yes	No	No	10	34.1	Non-neonatal complications	No	No	No	No
31862	7	19.92	Primary	2	2	Yes	Yes	No	No	No	10.2	34	Non-neonatal complications	No	No	No	No
31858	4	23.11	Primary	1	2	Yes	Yes	No	No	No	8.2	32.3	Non-neonatal complications	No	No	No	No
31853	1	22.27	Secondary	1	2	No	Yes	No	No	No	10	27.3	Non-neonatal complications	No	No	Yes	No
31850	1	17.97	Secondary	1	1	No	Yes	No	No	No	7.5	29.1	Non-neonatal complications	No	No	No	No
31820	10	24.14	Primary	1	2	Yes	No	No	No	No	12.2	33.7	Neonatal complications	Yes	Yes	No	No
31766	5	20.96	Secondary	2	2	Yes	No	No	No	No	7.2	28	Non-neonatal complications	No	No	No	No
31729	3	20.94	Primary	2	2	No	Yes	No	No	No	8	34.2	Non-neonatal complications	Yes	No	No	No
31672	6	21.72	Secondary	1	2	Yes	Yes	No	No	No	13	28.4	Non-neonatal complications	No	No	No	No
31649	1	22.86	Primary	2	1	Yes	No	No	No	Yes	9	26.5	Non-neonatal complications	No	No	No	No
31639	5	21.88	Primary	1	1	Yes	No	Yes	No	No	8.2	25.9	Non-neonatal complications	No	No	No	No
31636	2	17.72	Primary	2	2	No	Yes	No	No	No	9.4	27.6	Non-neonatal complications	Yes	No	Yes	No
31616	1	24.97	Secondary	1	1	Yes	No	No	No	No	9	34	Non-neonatal complications	No	No	No	No
31614	3	20.69	Primary	1	1	Yes	No	No	No	No	10.6	32.8	Non-neonatal complications	No	No	No	No
31591	8	23.83	Secondary	2	2	Yes	Yes	No	No	No	9	28	Neonatal complications	No	No	Yes	No
31586	2	18.9	Secondary	1	2	Yes	Yes	No	No	No	10	32.5	Non-neonatal complications	No	No	No	No
31565	1	19.15	Secondary	2	2	Yes	No	No	No	No	7	34.3	Non-neonatal complications	No	No	No	No
31556	2	19.82	Primary	1	2	Yes	No	Yes	No	No	9	30.6	Non-neonatal complications	No	No	No	No
31554	1	30.86	Secondary	2	2	Yes	Yes	No	No	No	12.9	24.4	Non-neonatal complications	No	No	No	No
31536	3	26.04	Primary	1	2	Yes	No	No	No	No	8.8	31.5	Neonatal complications	Yes	Yes	No	No
31516	1	20.08	Secondary	2	2	No	Yes	No	No	No	7.5	30.7	Non-neonatal complications	No	No	No	No
31500	2	19.72	Primary	1	1	Yes	No	No	No	No	9	29.6	Non-neonatal complications	No	No	No	No
31493	6	19.1	Primary	1	2	Yes	Yes	No	No	No	7.5	26.6	Non-neonatal complications	No	No	No	No
31487	1	17.26	Primary	1	2	No	Yes	No	No	No	8.3	27.7	Neonatal complications	No	Yes	No	No
31479	1	20.32	Secondary	1	1	Yes	No	No	No	No	9	32.7	Non-neonatal complications	No	No	No	No
31471	2	22.38	Primary	1	2	Yes	Yes	No	No	No	8	31.4	Non-neonatal complications	No	No	No	No
31457	2	20.17	Secondary	2	2	Yes	Yes	No	No	No	10	22.1	Non-neonatal complications	No	No	No	No
31436	3	24.8	Primary	1	1	Yes	No	No	No	No	9	31.6	Non-neonatal complications	No	No	No	No
31429	1	16.8	Secondary	1	2	Yes	Yes	No	No	No	7	32.1	Non-neonatal complications	No	No	No	No
31426	1	20.83	Primary	2	2	No	Yes	No	No	No	12.4	29.1	Non-neonatal complications	No	No	No	No
31421	2	18.97	Primary	2	2	No	Yes	No	No	No	8.5	28.9	Neonatal complications	No	Yes	No	No
31420	3	20.82	Secondary	2	2	Yes	Yes	No	No	No	11	29.1	Neonatal complications	Yes	Yes	No	No
31404	1	25.2	Primary	2	2	Yes	No	Yes	No	No	8.1	26.2	Non-neonatal complications	No	No	No	No
31402	4	19.98	Secondary	1	2	Yes	No	No	No	No	13.1	29.9	Non-neonatal complications	No	No	No	No
31396	4	21.83	Primary	1	2	Yes	Yes	No	No	No	8.5	28.4	Non-neonatal complications	No	No	No	No
31383	2	22.35	Secondary	1	2	Yes	No	No	No	No	7	33.2	Non-neonatal complications	No	No	No	No
31374	3	25.34	Primary	1	1	No	Yes	No	No	No	8.5	32.4	Neonatal complications	No	No	No	Yes
31355	3	17.69	Secondary	2	2	Yes	Yes	No	No	No	8	24.1	Non-neonatal complications	No	No	No	No
31346	1	22.03	Primary	1	2	Yes	Yes	Yes	No	No	8.5	28.1	Non-neonatal complications	No	No	No	No
31343	5	22.89	Primary	1	1	Yes	No	Yes	No	No	8.7	27.1	Non-neonatal complications	No	No	No	No
31334	2	19.71	Primary	2	1	No	Yes	No	No	No	9.5	23.8	Non-neonatal complications	No	No	No	No
31323	5	19.57	Primary	1	1	Yes	No	No	No	No	9.5	26	Neonatal complications	No	No	No	Yes
31313	4	26.04	Primary	1	2	Yes	Yes	No	No	Yes	12.2	28	Non-neonatal complications	No	No	No	No
31299	2	21.88	Primary	1	1	Yes	No	No	No	No	10.8	30	Non-neonatal complications	No	No	No	No
31295	5	19.15	Primary	1	1	Yes	No	No	No	No	8.7	23.8	Non-neonatal complications	No	No	No	No
31292	4	19.47	Secondary	1	2	Yes	Yes	No	No	No	10.7	30.2	Non-neonatal complications	No	No	No	No
31289	6	24.46	Secondary	2	2	Yes	Yes	No	Yes	No	7	26.3	Neonatal complications	No	No	Yes	No
31286	1	20.03	Primary	1	1	Yes	No	No	No	No	9.8	24.4	Neonatal complications	Yes	Yes	No	No
31285	4	21.48	Secondary	2	1	Yes	No	No	No	No	8.8	24.1	Non-neonatal complications	No	No	No	No
31273	3	20.08	Secondary	1	1	Yes	No	No	No	No	10.1	32.7	Non-neonatal complications	No	No	No	No
31261	2	20.7	Secondary	1	2	Yes	No	No	No	No	7.5	32.5	Non-neonatal complications	No	No	No	No
31256	1	19.72	Secondary	1	2	Yes	No	No	No	No	9.3	35	Non-neonatal complications	No	No	No	No
31231	9	17.31	Primary	1	1	Yes	No	No	No	No	10.7	30	Non-neonatal complications	No	No	No	No
31219	1	20.96	Secondary	1	2	Yes	Yes	Yes	No	No	9.7	22.8	Non-neonatal complications	No	No	No	No
31191	14	21.45	Primary	1	1	Yes	No	No	No	No	10.4	30.2	Neonatal complications	No	No	No	Yes
31184	1	22.6	Secondary	1	2	Yes	No	No	No	No	8.8	27	Neonatal complications	Yes	Yes	No	No
31182	7	17.19	Primary	1	1	Yes	No	No	No	No	8.4	31.3	Non-neonatal complications	No	No	No	No
31162	1	20.08	Secondary	1	2	Yes	No	No	No	No	10.6	23.3	Neonatal complications	No	Yes	No	No
31158	5	20.08	Secondary	1	1	Yes	No	No	No	No	10.9	28.8	Non-neonatal complications	No	No	No	No
31147	9	24.65	Secondary	2	1	Yes	No	Yes	No	No	9	34.8	Neonatal complications	Yes	Yes	No	No
31139	6	19.83	Primary	1	2	No	Yes	No	No	Yes	9.3	27.2	Neonatal complications	Yes	Yes	No	No
31132	1	19.14	Secondary	1	1	Yes	No	No	No	No	12	34.9	Non-neonatal complications	No	No	No	No
31129	5	28.13	Primary	2	2	Yes	Yes	No	No	No	11	30.5	Neonatal complications	No	No	No	Yes
31111	2	20.96	Secondary	1	1	No	Yes	No	No	No	9	35	Neonatal complications	No	No	Yes	No
31109	2	16.41	Primary	2	1	Yes	No	No	No	No	16	27	Non-neonatal complications	No	No	No	No
31085	2	20.83	Secondary	2	2	No	Yes	Yes	No	No	7.7	32.6	Non-neonatal complications	No	No	No	No
31079	4	18.66	Primary	1	1	No	Yes	No	No	No	10.1	30.5	Non-neonatal complications	No	No	No	No
31061	1	18.83	Secondary	1	1	Yes	No	No	No	No	8	29.3	Non-neonatal complications	No	No	No	No
31051	4	30.67	Secondary	2	1	Yes	No	No	No	No	8.5	32.6	Non-neonatal complications	No	No	No	No
31047	2	22.89	Secondary	1	1	Yes	No	No	No	No	8.8	34.5	Non-neonatal complications	No	No	No	No
31017	5	21.93	Secondary	1	1	Yes	No	No	No	No	12	34.7	Non-neonatal complications	No	No	No	No
31002	3	18.44	Secondary	2	2	Yes	Yes	No	No	No	8.4	32.2	Neonatal complications	Yes	Yes	No	No
30997	1	21.23	Primary	1	2	Yes	No	Yes	No	No	8.1	27.8	Non-neonatal complications	No	No	No	No
30995	3	17.53	Secondary	1	1	Yes	No	No	No	No	9	27.3	Non-neonatal complications	No	No	No	No
30991	1	18.43	Secondary	1	1	Yes	No	No	No	No	9.5	31.9	Non-neonatal complications	No	No	No	No
30987	1	21.48	Secondary	2	2	Yes	Yes	No	No	No	8	31.8	Non-neonatal complications	No	No	No	No
30983	1	18.03	Secondary	1	2	Yes	Yes	No	No	No	8	29.1	Neonatal complications	No	Yes	No	No
30981	1	21.48	Primary	1	1	Yes	No	Yes	No	No	10	30.7	Non-neonatal complications	No	No	No	No
30937	4	20.81	Secondary	2	2	Yes	Yes	No	No	No	7.5	25.3	Neonatal complications	No	Yes	No	No
30936	2	20.2	Secondary	2	2	No	Yes	No	No	No	7	29.8	Non-neonatal complications	No	No	No	No
30920	3	17.85	Primary	1	2	Yes	No	Yes	No	No	11.1	28.7	Neonatal complications	No	Yes	No	No
30910	2	21.51	Primary	1	1	Yes	No	No	No	Yes	12	35	Non-neonatal complications	No	No	No	No
30904	3	20.03	Primary	1	2	No	Yes	No	No	No	10.5	31.9	Non-neonatal complications	No	No	No	No
30898	3	19.95	Primary	1	2	Yes	Yes	Yes	No	No	10	26.2	Neonatal complications	Yes	Yes	No	No
30891	7	21.48	Secondary	2	1	Yes	No	No	No	No	12	34.8	Non-neonatal complications	No	No	No	No
30868	3	19.49	Primary	1	2	Yes	No	No	No	No	8	28.1	Non-neonatal complications	No	No	No	No
30855	1	19.83	Primary	2	2	Yes	Yes	No	No	No	8.5	35	Neonatal complications	Yes	No	No	No
30837	1	27.18	Primary	1	2	Yes	No	Yes	No	No	10	26.3	Non-neonatal complications	No	No	No	No
30831	1	26.35	Secondary	1	1	Yes	No	No	No	No	11	34.9	Non-neonatal complications	No	No	No	No
30809	4	18.69	Primary	2	1	Yes	No	Yes	No	No	8	28.4	Neonatal complications	No	No	No	Yes
30802	2	20.81	Secondary	1	2	No	Yes	No	No	No	10.5	33.8	Non-neonatal complications	No	No	No	No
30784	3	22.03	Secondary	1	1	Yes	No	No	No	No	7	30	Non-neonatal complications	No	No	No	No
30757	1	29.38	Primary	1	1	Yes	No	No	No	No	8.5	24	Non-neonatal complications	No	No	No	No
30748	9	23.44	Primary	1	2	Yes	No	Yes	No	No	8.5	30.1	Non-neonatal complications	No	No	No	No
30740	1	18.07	Secondary	1	1	Yes	No	No	No	No	9	26.6	Non-neonatal complications	No	No	No	No
30730	2	20.94	Primary	2	2	Yes	No	Yes	No	No	10	31.9	Neonatal complications	Yes	Yes	No	No
30726	7	23.42	Secondary	2	2	No	Yes	No	No	No	8.2	32.7	Non-neonatal complications	No	No	No	No
30716	2	18.43	Secondary	1	1	Yes	No	No	No	No	7.7	28.9	Non-neonatal complications	No	No	No	No
30696	5	20.28	Secondary	1	1	Yes	No	No	No	No	8.3	30.7	Non-neonatal complications	No	No	No	No
30688	3	19.88	Primary	1	1	Yes	No	No	No	No	9.3	32.3	Non-neonatal complications	No	No	No	No
30681	6	19.78	Secondary	1	2	Yes	No	No	No	No	7	34.9	Neonatal complications	Yes	No	No	No
30676	2	18.37	Primary	2	2	No	Yes	No	No	No	7.5	28.5	Neonatal complications	Yes	Yes	No	No
30644	3	20.06	Primary	2	2	Yes	No	No	No	Yes	8.5	31	Neonatal complications	Yes	Yes	No	No
30627	1	25.65	Secondary	2	2	Yes	Yes	No	No	No	10	32.8	Neonatal complications	No	No	No	Yes
30603	8	22.31	Primary	1	2	Yes	No	No	No	No	9	35	Neonatal complications	Yes	Yes	No	No
30587	7	17.72	Primary	1	1	Yes	No	No	No	No	11.5	32.5	Non-neonatal complications	No	No	No	No
30583	1	17.69	Secondary	1	1	Yes	No	No	No	Yes	9	34.1	Non-neonatal complications	No	No	No	No
30560	2	26.04	Secondary	1	1	Yes	No	No	No	No	8	35	Non-neonatal complications	No	No	No	No
30545	6	23.44	Primary	2	2	Yes	Yes	No	No	No	12.4	30.7	Neonatal complications	No	No	No	Yes
30541	2	20.96	Primary	1	1	Yes	No	No	No	No	9.6	28.7	Non-neonatal complications	No	No	No	No
30521	1	18.59	Secondary	1	1	Yes	No	No	No	No	13	26.2	Non-neonatal complications	No	No	No	No
30511	3	20.4	Primary	1	2	Yes	No	No	No	No	10.5	29.4	Non-neonatal complications	No	No	No	No
30483	4	20.81	Secondary	2	1	No	Yes	No	No	No	8.4	30.8	Non-neonatal complications	No	No	No	No
30448	5	19.56	Secondary	1	1	Yes	No	No	No	Yes	10.2	30.1	Neonatal complications	Yes	Yes	No	No
30420	2	20.17	Primary	1	1	Yes	No	No	No	Yes	9	27.7	Non-neonatal complications	No	No	No	No
30415	2	21.79	Secondary	2	2	Yes	Yes	No	No	No	9.7	26.1	Neonatal complications	Yes	Yes	No	No
30406	1	28.76	Secondary	1	1	Yes	No	No	No	Yes	9	33.9	Non-neonatal complications	No	No	No	No
30379	5	18.67	Secondary	1	1	No	Yes	No	No	No	10	23	Non-neonatal complications	No	No	No	No
30366	5	25.2	Secondary	1	1	Yes	No	No	No	No	9.3	34.5	Non-neonatal complications	No	No	No	No
30357	2	24.03	Primary	2	2	Yes	Yes	No	No	No	9.8	31.3	Neonatal complications	No	No	No	Yes
30337	2	19.63	Primary	1	1	Yes	No	No	No	No	11.2	27.1	Non-neonatal complications	No	No	No	No
30328	2	20.13	Primary	1	2	Yes	Yes	No	No	No	8	27.2	Non-neonatal complications	No	No	No	No
30286	1	20.62	Secondary	1	1	Yes	No	No	No	No	11	30.3	Non-neonatal complications	No	No	No	No
30282	1	22.89	Secondary	1	1	Yes	No	No	No	No	8.2	25.9	Non-neonatal complications	No	No	No	No
30274	4	21.78	Primary	1	1	Yes	No	No	No	No	12	28.5	Non-neonatal complications	No	No	No	No
30273	2	19.71	Primary	1	1	Yes	No	No	Yes	No	10	29.8	Non-neonatal complications	No	No	No	No
30267	6	21.93	Primary	1	2	Yes	No	No	No	No	9	34.9	Neonatal complications	Yes	Yes	No	No
30258	4	22.04	Secondary	2	2	Yes	Yes	No	No	No	9.1	31.7	Neonatal complications	Yes	Yes	No	No
30234	1	21.23	Secondary	1	2	No	Yes	No	No	No	9	28.3	Non-neonatal complications	No	No	No	No
30231	4	18.75	Primary	2	1	Yes	No	No	No	No	10.3	32.3	Non-neonatal complications	No	No	No	No
30222	5	22.19	Secondary	2	1	Yes	No	No	No	Yes	8.5	31.4	Neonatal complications	No	No	No	Yes
30214	3	23.23	Primary	2	2	Yes	No	No	No	Yes	9	31.6	Non-neonatal complications	No	No	No	No
30206	1	20.28	Primary	1	1	Yes	No	No	Yes	No	10	24.7	Non-neonatal complications	No	No	No	No
30175	5	20.2	Primary	1	2	Yes	Yes	No	No	No	9	25.6	Neonatal complications	Yes	Yes	No	No
30166	3	17.06	Secondary	1	1	Yes	No	No	No	No	8	31.9	Non-neonatal complications	No	No	No	No
30137	5	19.95	Primary	2	2	No	Yes	Yes	No	No	8.4	26	Non-neonatal complications	No	No	No	No
30114	5	18.75	Secondary	1	2	Yes	Yes	No	Yes	No	7.2	31.3	Neonatal complications	Yes	Yes	No	No
30111	7	23.59	Primary	1	1	Yes	No	No	No	Yes	10	22.2	Non-neonatal complications	No	No	No	No
30097	1	26.22	Secondary	2	2	Yes	No	No	No	No	9.9	30.3	Non-neonatal complications	No	No	No	No
30060	2	22.04	Primary	2	2	Yes	No	No	No	No	8	29.4	Neonatal complications	Yes	Yes	No	No
30056	1	17.97	Secondary	1	1	Yes	No	No	No	No	9	30.2	Non-neonatal complications	No	No	No	No
30052	1	23.07	Secondary	1	1	Yes	No	No	No	No	11.7	32.4	Non-neonatal complications	No	No	No	No
30040	1	18.96	Secondary	2	2	No	Yes	No	No	No	10	34	Neonatal complications	Yes	Yes	No	No
30028	1	20.81	Secondary	1	2	Yes	No	No	No	No	11	29.2	Non-neonatal complications	No	No	No	No
30015	1	21.09	Secondary	2	2	Yes	No	No	No	No	9.7	25.7	Non-neonatal complications	No	No	No	No
29996	1	23.01	Secondary	2	1	Yes	No	No	No	No	9	30	Non-neonatal complications	No	No	No	No
29988	1	20.2	Secondary	1	2	Yes	No	No	No	No	9.2	33.9	Neonatal complications	Yes	Yes	No	No
29983	2	19.05	Secondary	1	1	Yes	No	No	No	No	10	25	Non-neonatal complications	No	No	No	No
29960	3	26.56	Secondary	2	1	Yes	No	Yes	No	No	8.5	31.8	Neonatal complications	Yes	No	No	No
29946	2	19.14	Primary	1	1	Yes	No	No	No	Yes	7.5	30.4	Non-neonatal complications	No	No	No	No
29944	3	19.96	Primary	1	1	Yes	No	No	No	Yes	10.5	31.2	Non-neonatal complications	No	No	No	No
29931	6	22.22	Secondary	1	2	Yes	No	No	No	No	7.2	26.9	Non-neonatal complications	No	No	No	No
29927	1	18.52	Primary	1	2	No	Yes	No	No	Yes	11.8	27.2	Non-neonatal complications	No	No	No	No
29919	2	19.3	Secondary	2	2	Yes	Yes	No	Yes	No	8	30.9	Neonatal complications	No	Yes	No	No
29900	4	16.9	Primary	2	2	Yes	Yes	No	No	No	7.1	28.9	Neonatal complications	No	Yes	No	No
29891	9	17.91	Secondary	1	2	Yes	Yes	No	No	No	10.4	28.3	Non-neonatal complications	No	No	No	No
29890	1	24.44	Secondary	2	2	Yes	Yes	No	No	No	12	28.4	Non-neonatal complications	No	No	No	No
29884	2	24.61	Primary	2	1	Yes	No	No	No	No	9.6	29.7	Non-neonatal complications	No	No	No	No
29882	2	26.03	Secondary	1	2	Yes	No	No	No	No	9	27.5	Non-neonatal complications	No	No	No	No
29858	1	14.87	Secondary	1	1	Yes	No	No	No	No	8	22.6	Non-neonatal complications	No	No	No	No
29851	2	21.08	Primary	1	2	No	Yes	No	No	No	11	32.9	Non-neonatal complications	No	No	No	No
29843	6	22.03	Secondary	2	2	Yes	Yes	No	No	No	8.5	33.4	Neonatal complications	No	Yes	No	No
29839	4	17.78	Primary	2	2	Yes	No	No	No	No	10	30	Non-neonatal complications	No	No	No	No
29830	1	22.27	Secondary	1	2	Yes	No	No	No	No	10.6	23.9	Non-neonatal complications	No	No	No	No
29825	3	22.21	Primary	2	2	Yes	No	No	No	No	11	28.2	Non-neonatal complications	No	No	No	No
29809	2	27.34	Secondary	2	2	Yes	Yes	No	No	No	11	25.3	Non-neonatal complications	No	No	No	No
29802	2	18.49	Secondary	2	2	Yes	Yes	No	No	No	8.5	30	Neonatal complications	Yes	Yes	No	No
29780	4	20.57	Secondary	1	1	Yes	No	No	No	No	9.5	27.1	Non-neonatal complications	No	No	No	No
29758	1	21.5	Secondary	2	1	Yes	No	No	No	No	7	28.1	Non-neonatal complications	No	No	No	No
29734	2	23.81	Primary	1	1	Yes	No	No	No	Yes	9	27.2	Non-neonatal complications	No	No	No	No
29718	2	22.27	Secondary	2	2	Yes	Yes	No	No	No	9.4	28.7	Non-neonatal complications	No	No	No	No
29706	6	23.95	Secondary	1	1	Yes	No	No	No	No	8	32.8	Non-neonatal complications	No	No	No	No
29678	1	20.94	Secondary	2	1	Yes	No	No	No	No	10	29.3	Neonatal complications	No	Yes	No	No
29676	2	17.63	Primary	1	2	Yes	No	No	No	Yes	7.5	32	Neonatal complications	Yes	Yes	No	No
29641	1	20.2	Primary	2	2	Yes	Yes	Yes	No	No	10	26.9	Non-neonatal complications	No	No	No	No
29635	2	21.09	Primary	1	1	Yes	No	Yes	No	No	7.7	30.9	Non-neonatal complications	No	No	No	No
29585	4	20.08	Secondary	1	2	Yes	No	No	No	No	7	27	Non-neonatal complications	No	No	No	No
29523	3	26.3	Primary	1	1	Yes	No	Yes	No	No	11	27	Non-neonatal complications	No	No	No	No
29515	1	24.14	Secondary	1	1	Yes	No	No	No	No	10	26.3	Non-neonatal complications	No	No	No	No
29504	8	17.53	Secondary	1	1	Yes	No	No	No	No	8.9	32.4	Non-neonatal complications	No	No	No	No
29471	1	21.88	Primary	2	1	Yes	No	No	No	No	8.3	31.5	Non-neonatal complications	No	No	No	No
29457	2	20.57	Secondary	2	2	Yes	Yes	No	No	No	9	27.3	Neonatal complications	Yes	Yes	No	No
29444	1	28.91	Secondary	1	1	Yes	No	Yes	No	No	8.5	33.6	Non-neonatal complications	No	No	No	No
29433	6	16.85	Secondary	2	1	Yes	No	No	No	No	8.5	31.8	Non-neonatal complications	No	No	No	No
29390	2	23.94	Primary	2	2	Yes	No	No	No	Yes	8.7	31.3	Neonatal complications	No	Yes	No	No
29376	1	20.9	Secondary	1	1	Yes	No	No	No	No	9	35	Non-neonatal complications	No	No	No	No
29357	1	23.83	Secondary	1	2	Yes	No	No	No	No	8	26.6	Non-neonatal complications	No	No	No	No
29346	2	21.1	Secondary	1	2	Yes	Yes	No	No	No	8.1	32.2	Non-neonatal complications	No	No	No	No
29297	2	22.22	Primary	2	2	Yes	Yes	No	No	No	8.5	35	Non-neonatal complications	No	No	No	No
29288	7	25.4	Primary	1	2	Yes	Yes	No	No	No	9	26.9	Non-neonatal complications	No	No	No	No
29272	3	26.56	Primary	2	2	Yes	No	No	No	No	10	31	Non-neonatal complications	No	No	No	No
29266	3	25.71	Primary	1	2	No	Yes	No	No	No	8.5	30.8	Non-neonatal complications	No	No	No	No
29262	6	25.28	Primary	2	1	Yes	No	Yes	No	No	8.8	31.7	Neonatal complications	Yes	No	No	No
29260	3	17.75	Secondary	2	1	Yes	No	Yes	No	No	9	29.1	Non-neonatal complications	No	No	No	No
29214	1	18.59	Secondary	2	2	Yes	No	No	No	No	8	31.9	Non-neonatal complications	No	No	No	No
29181	2	18.83	Primary	1	1	Yes	No	No	No	No	9	32.6	Non-neonatal complications	No	No	No	No
29133	1	24.03	Secondary	2	2	Yes	Yes	No	No	No	7.5	27.7	Neonatal complications	Yes	Yes	No	No
29103	1	16.9	Secondary	1	2	Yes	No	No	No	No	7.5	34.9	Non-neonatal complications	No	No	No	No
29059	4	26.49	Secondary	2	2	No	Yes	Yes	No	No	9	31.3	Neonatal complications	No	Yes	No	No
29043	2	22.43	Secondary	2	2	Yes	Yes	No	No	No	7	30.2	Neonatal complications	No	Yes	No	No
29039	4	24.77	Primary	1	2	Yes	No	No	No	No	7	32.4	Neonatal complications	Yes	Yes	No	No
29025	1	20.28	Secondary	2	1	Yes	No	No	No	No	9.8	33.3	Non-neonatal complications	No	No	No	No
29003	2	19.95	Primary	2	2	Yes	No	No	Yes	No	15	30.9	Non-neonatal complications	No	No	No	No
29001	3	18.43	Primary	1	1	Yes	No	No	No	Yes	11.2	33.5	Non-neonatal complications	No	No	No	No
28905	1	26.08	Secondary	2	2	Yes	No	No	No	No	11	32.8	Non-neonatal complications	No	No	No	No
28876	3	21.79	Primary	2	2	Yes	No	No	No	No	9	30.5	Non-neonatal complications	No	No	No	No
28843	4	18.96	Secondary	1	2	Yes	No	No	No	No	8	27	Non-neonatal complications	No	No	No	No
28810	6	21.48	Primary	1	2	Yes	No	No	No	No	9.3	33.3	Non-neonatal complications	No	No	No	No
28789	3	17.9	Primary	2	2	Yes	No	No	No	No	10.3	30.1	Non-neonatal complications	No	No	No	No
28739	6	22.66	Primary	2	2	Yes	Yes	Yes	No	No	12.8	29.5	Neonatal complications	Yes	No	No	No
28656	3	18.96	Primary	1	2	Yes	No	No	No	Yes	13	27.4	Non-neonatal complications	No	No	No	No
28646	2	19.23	Secondary	2	2	Yes	No	No	No	Yes	9	31.2	Non-neonatal complications	No	No	No	No
28621	2	17.04	Primary	2	1	Yes	No	No	No	No	8	33.6	Non-neonatal complications	No	No	No	No
28613	3	22.1	Primary	2	2	Yes	Yes	No	No	No	10	26.9	Non-neonatal complications	No	No	No	No
28575	3	21.09	Primary	2	2	Yes	Yes	No	No	No	11	28.8	Neonatal complications	Yes	Yes	No	No
28571	2	18.82	Secondary	2	1	Yes	No	Yes	No	No	8.5	32.2	Non-neonatal complications	No	No	No	No
28550	2	20.2	Secondary	2	1	No	Yes	No	No	No	8	32	Non-neonatal complications	No	No	No	No
28530	6	28.13	Primary	2	1	Yes	No	Yes	No	No	8	31.6	Non-neonatal complications	No	No	No	No
28492	2	19.98	Secondary	2	2	Yes	No	No	No	No	10	28	Non-neonatal complications	No	No	No	No
28457	2	17.15	Primary	2	1	Yes	No	No	No	No	9	23.6	Non-neonatal complications	No	No	No	No
28306	1	20.89	Secondary	2	2	Yes	Yes	No	No	No	10	31.5	Non-neonatal complications	No	No	No	No
28304	3	20.03	Primary	1	1	Yes	No	No	No	Yes	10	32.5	Non-neonatal complications	No	No	No	No
28283	3	19.43	Primary	2	1	Yes	No	No	Yes	No	10.5	29	Neonatal complications	Yes	No	No	No
28281	1	20.2	Secondary	2	2	Yes	No	No	No	No	8.2	33.8	Neonatal complications	Yes	Yes	No	No
28277	1	21.16	Secondary	2	1	Yes	No	No	No	No	9	27.1	Neonatal complications	No	No	No	Yes
28235	2	20.31	Primary	2	2	No	Yes	No	No	No	10.1	32.5	Non-neonatal complications	No	No	No	No
28206	5	22.43	Secondary	1	2	Yes	Yes	No	No	No	8	27.4	Neonatal complications	No	No	No	Yes
28194	7	22.04	Secondary	2	2	No	Yes	No	No	No	9	31	Non-neonatal complications	Yes	No	No	No
28184	2	26.13	Secondary	2	2	Yes	Yes	No	No	No	10.7	26.1	Non-neonatal complications	No	No	No	No
28167	5	20.81	Primary	1	1	Yes	No	Yes	No	No	11.3	28.1	Neonatal complications	Yes	Yes	No	No
28153	3	21.93	Primary	2	2	Yes	Yes	Yes	No	No	10	30.1	Neonatal complications	Yes	Yes	No	No
28114	1	20.76	Secondary	2	2	Yes	No	No	No	No	8.4	34.3	Neonatal complications	Yes	No	No	No
28112	1	21.09	Secondary	2	2	Yes	No	No	No	No	7	34.6	Non-neonatal complications	No	No	No	No
28098	5	18.37	Primary	2	2	No	Yes	Yes	No	No	8	28.1	Non-neonatal complications	No	No	No	No
27980	2	24.65	Primary	1	2	Yes	Yes	No	No	Yes	12.3	26.4	Neonatal complications	No	Yes	No	No
27971	10	20.4	Secondary	2	2	Yes	No	No	No	No	13	35	Neonatal complications	Yes	Yes	No	No
27957	2	16.44	Primary	2	2	Yes	No	No	No	No	8	31.7	Non-neonatal complications	No	No	No	No
27897	1	19.33	Secondary	1	2	No	Yes	No	No	No	9	32	Non-neonatal complications	No	No	No	No
27851	1	16.46	Primary	2	2	Yes	No	No	No	No	11	23.4	Non-neonatal complications	No	No	No	No
27784	1	21.67	Secondary	1	2	Yes	No	No	No	No	9.6	29.5	Neonatal complications	Yes	Yes	No	No
27699	4	20.7	Primary	1	1	Yes	No	No	No	Yes	7.3	34.4	Non-neonatal complications	No	No	No	No
27691	1	20.83	Secondary	2	2	Yes	Yes	No	No	No	7	26.9	Neonatal complications	No	No	No	Yes
27523	5	27.77	Primary	2	1	Yes	No	No	No	No	10	30.2	Neonatal complications	Yes	No	No	No
27476	3	17.71	Secondary	2	1	Yes	No	No	No	No	8.7	34.6	Non-neonatal complications	No	No	No	No
27371	1	20.58	Secondary	1	1	Yes	No	Yes	No	No	9.8	31.5	Neonatal complications	No	Yes	No	No
27360	5	17.69	Secondary	2	2	Yes	No	No	No	No	9	32	Non-neonatal complications	No	No	No	No
27259	6	18.29	Primary	2	1	Yes	No	No	No	No	10	28.9	Non-neonatal complications	No	No	No	No
27236	3	24.31	Primary	1	2	Yes	No	Yes	No	No	10.3	30.6	Non-neonatal complications	No	No	No	No
27225	7	21.46	Secondary	2	2	Yes	No	No	No	No	10	28.7	Neonatal complications	Yes	Yes	No	No
27178	3	21.79	Secondary	2	1	Yes	No	No	No	No	11	31.4	Non-neonatal complications	No	No	No	No
27104	2	17.58	Secondary	2	1	Yes	No	No	Yes	No	7.3	30.5	Non-neonatal complications	No	No	No	No
26902	1	24.03	Secondary	2	1	Yes	No	No	No	No	9	27.8	Non-neonatal complications	No	No	No	No
26716	2	17.71	Secondary	2	2	No	Yes	No	No	No	10	32.9	Non-neonatal complications	No	No	No	No
26700	3	23.23	Primary	1	2	Yes	Yes	Yes	No	No	9	30.3	Non-neonatal complications	No	No	No	No
26389	4	21.64	Secondary	2	2	Yes	Yes	No	No	No	8	35	Non-neonatal complications	No	No	No	No
26321	2	19.72	Secondary	2	2	Yes	Yes	No	No	Yes	10.9	22.3	Non-neonatal complications	No	No	No	No
26294	4	22.58	Primary	1	2	Yes	Yes	No	Yes	No	8	29.3	Non-neonatal complications	No	No	No	No
26136	1	24.84	Secondary	2	2	No	Yes	No	No	No	7.5	30.1	Non-neonatal complications	No	No	No	No
25982	4	25.39	Secondary	1	1	Yes	No	Yes	No	No	10.2	31.3	Neonatal complications	No	No	No	Yes
25925	1	21.06	Secondary	2	2	Yes	No	No	No	No	7	35	Neonatal complications	No	Yes	No	No
25881	3	24.03	Secondary	2	2	Yes	Yes	No	No	No	7.4	32.6	Non-neonatal complications	No	No	No	No
25768	1	22.04	Secondary	2	1	Yes	No	No	No	No	9	34.5	Non-neonatal complications	No	No	No	No
25750	3	18.9	Secondary	2	1	Yes	No	No	No	No	9.1	35	Non-neonatal complications	No	No	No	No
25748	1	19.63	Primary	2	2	Yes	No	No	No	Yes	9	35	Neonatal complications	No	Yes	No	No
25581	1	18.44	Secondary	2	2	Yes	Yes	No	No	No	10	28.3	Neonatal complications	No	No	No	Yes
25471	8	20.13	Secondary	2	2	Yes	Yes	No	No	No	9.5	32	Non-neonatal complications	No	No	No	No
24683	3	21.1	Secondary	2	2	Yes	Yes	No	No	No	10	32.6	Non-neonatal complications	No	No	No	No
24604	3	23.05	Primary	2	2	Yes	Yes	No	No	No	10.6	31.9	Neonatal complications	Yes	Yes	No	No
24476	3	32.32	Secondary	2	2	No	Yes	No	No	No	8	34.4	Non-neonatal complications	Yes	No	No	No
23776	3	16.33	Secondary	2	2	Yes	No	No	No	No	10	31.7	Non-neonatal complications	No	No	No	No
23596	4	17.31	Primary	1	2	Yes	No	No	No	No	10.7	30.9	Non-neonatal complications	No	No	No	No
23269	5	21.09	Secondary	2	2	Yes	Yes	No	No	No	7.2	32	Non-neonatal complications	No	No	No	No
23261	1	19.47	Secondary	2	2	Yes	No	No	No	No	7.5	25.5	Non-neonatal complications	No	No	No	No
23232	2	23.44	Secondary	2	2	Yes	No	No	No	No	12	26.8	Non-neonatal complications	No	No	No	No
22732	1	21.37	Secondary	2	1	Yes	No	No	No	No	10	29.8	Neonatal complications	No	Yes	No	No
22581	3	20.57	Secondary	2	2	Yes	Yes	No	No	No	8	31	Non-neonatal complications	No	No	No	No
22526	6	19.84	Secondary	2	2	Yes	Yes	No	No	Yes	9	29.5	Non-neonatal complications	No	No	No	No
22451	2	16.02	Secondary	2	2	Yes	No	No	No	No	7.3	25.6	Non-neonatal complications	No	No	No	No
22278	1	19.33	Secondary	2	2	Yes	Yes	No	No	No	8	32.8	Non-neonatal complications	No	No	No	No
21844	5	26.04	Secondary	2	2	Yes	No	No	No	No	7.4	34.9	Non-neonatal complications	No	No	No	No
21800	4	18.91	Secondary	2	2	Yes	Yes	No	Yes	No	12	33.4	Neonatal complications	Yes	Yes	No	No
21573	1	17.48	Secondary	2	1	Yes	No	No	Yes	No	10.5	35	Neonatal complications	Yes	No	No	No
21391	5	19.83	Secondary	2	2	Yes	No	No	No	No	9.1	31.4	Non-neonatal complications	No	No	No	No
21272	4	25	Secondary	2	2	Yes	Yes	No	No	No	10.2	30.8	Neonatal complications	Yes	Yes	No	No
21194	3	22.58	Secondary	2	2	No	Yes	No	No	No	9	30.5	Non-neonatal complications	No	No	No	No
21097	4	24.46	Secondary	2	2	Yes	No	No	No	No	8.5	34.6	Neonatal complications	Yes	Yes	No	No
21084	4	26.67	Secondary	2	1	Yes	No	No	No	No	9.4	33.3	Non-neonatal complications	No	No	No	No
20477	1	23.44	Secondary	2	1	Yes	No	No	No	No	8	27.4	Non-neonatal complications	No	No	No	No
20396	3	21.97	Secondary	2	1	Yes	No	No	No	No	8.5	30.6	Non-neonatal complications	No	No	No	No
19853	3	19.14	Secondary	2	1	Yes	No	Yes	No	No	10	29.7	Neonatal complications	No	No	No	Yes
19558	2	21.21	Secondary	2	1	Yes	No	Yes	No	No	8	27.3	Non-neonatal complications	No	No	No	No
19548	3	20.69	Secondary	2	1	Yes	No	No	No	No	10.1	31.1	Neonatal complications	Yes	No	No	No
19459	3	22.04	Secondary	2	1	Yes	No	No	No	No	9	30	Non-neonatal complications	No	No	No	No
19287	1	17.97	Secondary	2	2	Yes	No	Yes	No	No	9	31.4	Non-neonatal complications	No	No	No	No
18942	1	20.7	Secondary	2	2	Yes	Yes	No	No	No	9.4	33.6	Non-neonatal complications	No	No	No	No
18347	5	19.13	Secondary	1	1	Yes	No	No	No	No	8	31.9	Non-neonatal complications	No	No	No	No
18244	7	18.66	Secondary	2	2	Yes	Yes	No	No	No	10.3	33.5	Non-neonatal complications	No	No	No	No
17444	1	27.82	Secondary	2	2	Yes	Yes	No	No	Yes	10	27.2	Non-neonatal complications	No	No	No	No
17135	1	20.03	Secondary	1	2	Yes	No	No	No	No	10.1	26.5	Neonatal complications	Yes	No	No	No
16906	3	18.9	Primary	2	2	Yes	Yes	No	No	No	8.5	27.5	Non-neonatal complications	No	No	No	No
16371	2	23.15	Secondary	2	2	Yes	No	No	Yes	No	8.5	32	Non-neonatal complications	No	No	No	No
16082	3	24.22	Secondary	2	2	Yes	Yes	Yes	No	No	13.5	33.9	Non-neonatal complications	No	No	No	No
13088	4	19.81	Secondary	2	1	Yes	No	No	No	Yes	9	34.1	Neonatal complications	Yes	Yes	No	No
11504	2	22.73	Secondary	2	2	No	Yes	No	No	No	9.5	32.4	Non-neonatal complications	No	No	No	No
10635	4	17.63	Secondary	2	1	Yes	No	No	No	No	12.3	32.8	Non-neonatal complications	No	No	No	No
10528	2	19.14	Secondary	2	2	Yes	No	No	No	Yes	12	26.9	Neonatal complications	Yes	No	No	No
9814	1	20.45	Secondary	2	2	Yes	No	No	No	No	9	33.1	Neonatal complications	Yes	No	No	No
6897	6	25.24	Secondary	1	2	Yes	No	Yes	No	No	14	33.8	Neonatal complications	Yes	Yes	No	No

## Sheet: logistic-maternity complication
ID	Infertility duration(years)	BMI	Infertility type	Transplant cycle	Transplant number	high-quality blastocysts	transplantable double blastocyst	PCOS	EMS	Male	EN	Age	Complications	Gemellary pregnancy	Obstetric complications	miscarriage
33924	1	23.83	Secondary	1	1	Yes	No	No	No	No	9	32.7	Non-Maternity Complications	No	No	No
32118	5	32.01	Secondary	1	1	Yes	No	No	No	No	9.5	27.2	Non-Maternity Complications	No	No	No
22732	1	21.37	Secondary	2	1	Yes	No	No	No	No	10	29.8	Non-Maternity Complications	No	No	No
32506	1	29.14	Primary	1	1	Yes	No	Yes	No	No	9.4	25.1	Maternity Complications	No	Yes	No
33080	1	26.04	Secondary	1	1	Yes	No	No	No	No	9.2	29.1	Maternity Complications	No	Yes	No
30448	5	19.56	Secondary	1	1	Yes	No	No	No	Yes	10.2	30.1	Non-Maternity Complications	No	No	No
31147	9	24.65	Secondary	2	1	Yes	No	Yes	No	No	9	34.8	Non-Maternity Complications	No	No	No
32248	3	22.43	Primary	1	1	Yes	No	Yes	No	No	11	26.9	Non-Maternity Complications	No	No	No
31286	1	20.03	Primary	1	1	Yes	No	No	No	No	9.8	24.4	Non-Maternity Complications	No	No	No
13088	4	19.81	Secondary	2	1	Yes	No	No	No	Yes	9	34.1	Non-Maternity Complications	No	No	No
33422	2	22.58	Secondary	1	1	Yes	No	No	No	No	8.8	32.3	Non-Maternity Complications	No	No	No
35675	3	23.94	Primary	1	1	Yes	No	Yes	No	No	7.3	30.7	Non-Maternity Complications	No	No	No
27371	1	20.58	Secondary	1	1	Yes	No	Yes	No	No	9.8	31.5	Non-Maternity Complications	No	No	No
37928	2	22.89	Primary	1	1	Yes	No	No	No	No	8	28.7	Non-Maternity Complications	No	No	No
38038	5	27.55	Primary	2	1	Yes	No	No	No	No	11	28.4	Non-Maternity Complications	No	No	No
32020	5	25.1	Primary	1	1	Yes	No	No	No	No	9.2	28.8	Non-Maternity Complications	No	No	No
35720	1	17.15	Primary	1	1	Yes	No	No	No	No	9	25.7	Non-Maternity Complications	No	No	No
29678	1	20.94	Secondary	2	1	Yes	No	No	No	No	10	29.3	Non-Maternity Complications	No	No	No
29025	1	20.28	Secondary	2	1	Yes	No	No	No	No	9.8	33.3	Non-Maternity Complications	No	No	No
19548	3	20.69	Secondary	2	1	Yes	No	No	No	No	10.1	31.1	Non-Maternity Complications	No	No	No
27523	5	27.77	Primary	2	1	Yes	No	No	No	No	10	30.2	Non-Maternity Complications	No	No	No
28457	2	17.15	Primary	2	1	Yes	No	No	No	No	9	23.6	Non-Maternity Complications	No	No	No
33712	2	22.49	Secondary	1	1	Yes	No	No	No	No	10	26.3	Non-Maternity Complications	No	No	No
32540	3	20.13	Secondary	1	1	Yes	No	No	No	No	10.8	34.2	Non-Maternity Complications	No	No	No
29181	2	18.83	Primary	1	1	Yes	No	No	No	No	9	32.6	Non-Maternity Complications	No	No	No
33344	2	21.64	Primary	1	1	Yes	No	No	No	No	8.3	28.6	Non-Maternity Complications	No	No	No
32254	3	27.18	Primary	2	1	Yes	No	No	No	Yes	9.4	34.6	Non-Maternity Complications	No	No	No
32322	4	24.84	Secondary	2	1	Yes	No	No	No	No	9	29.7	Non-Maternity Complications	No	No	No
39638	7	18.31	Secondary	1	1	Yes	No	No	Yes	No	8.5	29.2	Non-Maternity Complications	No	No	No
33028	2	26.91	Primary	1	1	Yes	No	No	No	No	8	27.2	Non-Maternity Complications	No	No	No
33023	3	19.65	Primary	1	1	Yes	No	No	No	No	8	22	Non-Maternity Complications	No	No	No
37728	4	18.78	Secondary	1	1	Yes	No	Yes	No	No	7	34.4	Non-Maternity Complications	No	No	No
33678	6	30.08	Secondary	2	1	Yes	No	No	No	No	8.5	27.8	Non-Maternity Complications	No	No	No
21573	1	17.48	Secondary	2	1	Yes	No	No	Yes	No	10.5	35	Non-Maternity Complications	No	No	No
27699	4	20.7	Primary	1	1	Yes	No	No	No	Yes	7.3	34.4	Non-Maternity Complications	No	No	No
30688	3	19.88	Primary	1	1	Yes	No	No	No	No	9.3	32.3	Non-Maternity Complications	No	No	No
31132	1	19.14	Secondary	1	1	Yes	No	No	No	No	12	34.9	Non-Maternity Complications	No	No	No
29444	1	28.91	Secondary	1	1	Yes	No	Yes	No	No	8.5	33.6	Non-Maternity Complications	No	No	No
21084	4	26.67	Secondary	2	1	Yes	No	No	No	No	9.4	33.3	Non-Maternity Complications	No	No	No
30991	1	18.43	Secondary	1	1	Yes	No	No	No	No	9.5	31.9	Non-Maternity Complications	No	No	No
36928	2	28.89	Secondary	1	1	Yes	No	No	No	No	11	28.6	Non-Maternity Complications	No	No	No
39010	3	22.6	Primary	1	1	Yes	No	No	No	No	8.5	28.5	Non-Maternity Complications	No	No	No
30282	1	22.89	Secondary	1	1	Yes	No	No	No	No	8.2	25.9	Non-Maternity Complications	No	No	No
35909	1	19.43	Secondary	1	1	Yes	No	No	No	No	10	28.2	Non-Maternity Complications	No	No	No
31158	5	20.08	Secondary	1	1	Yes	No	No	No	No	10.9	28.8	Non-Maternity Complications	No	No	No
30891	7	21.48	Secondary	2	1	Yes	No	No	No	No	12	34.8	Non-Maternity Complications	No	No	No
29706	6	23.95	Secondary	1	1	Yes	No	No	No	No	8	32.8	Non-Maternity Complications	No	No	No
33732	4	20.2	Secondary	1	1	Yes	No	No	No	Yes	8.7	28.9	Non-Maternity Complications	No	No	No
32904	2	16	Secondary	1	1	Yes	No	No	No	No	7.3	25.2	Non-Maternity Complications	No	No	No
35393	3	18.83	Primary	1	1	Yes	No	No	No	No	8	23.3	Non-Maternity Complications	No	No	No
37181	2	17.15	Primary	1	1	Yes	No	No	No	No	8.5	34.5	Non-Maternity Complications	No	No	No
29376	1	20.9	Secondary	1	1	Yes	No	No	No	No	9	35	Non-Maternity Complications	No	No	No
37147	1	19.98	Secondary	1	1	Yes	No	No	No	No	8	35	Non-Maternity Complications	No	No	No
30366	5	25.2	Secondary	1	1	Yes	No	No	No	No	9.3	34.5	Non-Maternity Complications	No	No	No
35993	1	19.47	Primary	1	1	Yes	No	No	No	No	8.5	33	Non-Maternity Complications	No	No	No
31273	3	20.08	Secondary	1	1	Yes	No	No	No	No	10.1	32.7	Non-Maternity Complications	No	No	No
29960	3	26.56	Secondary	2	1	Yes	No	Yes	No	No	8.5	31.8	Non-Maternity Complications	No	No	No
31182	7	17.19	Primary	1	1	Yes	No	No	No	No	8.4	31.3	Non-Maternity Complications	No	No	No
35918	3	17.4	Primary	1	1	Yes	No	No	No	No	11	31.2	Non-Maternity Complications	No	No	No
35884	1	18.36	Secondary	1	1	Yes	No	No	No	No	10.4	30	Non-Maternity Complications	No	No	No
33073	3	22.21	Primary	1	1	Yes	No	Yes	No	No	11	28.3	Non-Maternity Complications	No	No	No
31343	5	22.89	Primary	1	1	Yes	No	Yes	No	No	8.7	27.1	Non-Maternity Complications	No	No	No
36238	2	20.2	Primary	1	1	Yes	No	No	No	No	7.8	25.6	Non-Maternity Complications	No	No	No
31926	5	20.5	Primary	2	1	Yes	No	No	No	No	11	24.9	Non-Maternity Complications	No	No	No
36219	1	18.87	Secondary	1	1	Yes	No	No	No	No	9	24.7	Non-Maternity Complications	No	No	No
31231	9	17.31	Primary	1	1	Yes	No	No	No	No	10.7	30	Non-Maternity Complications	No	No	No
30995	3	17.53	Secondary	1	1	Yes	No	No	No	No	9	27.3	Non-Maternity Complications	No	No	No
36061	2	22.04	Primary	2	1	Yes	No	Yes	No	No	10	26.4	Non-Maternity Complications	No	No	No
38630	2	18.43	Secondary	1	1	Yes	No	No	No	No	9	35	Non-Maternity Complications	No	No	No
30583	1	17.69	Secondary	1	1	Yes	No	No	No	Yes	9	34.1	Non-Maternity Complications	No	No	No
35168	3	25.64	Primary	1	1	Yes	No	No	No	No	9.7	31.2	Non-Maternity Complications	No	No	No
36856	5	21.48	Secondary	2	1	Yes	No	No	No	No	9	29.8	Non-Maternity Complications	No	No	No
35795	2	20.2	Secondary	1	1	Yes	No	No	No	No	9.6	29.7	Maternity Complications	No	Yes	No
33434	1	20.94	Secondary	1	1	Yes	No	No	No	No	7.6	28.8	Non-Maternity Complications	No	No	No
29758	1	21.5	Secondary	2	1	Yes	No	No	No	No	7	28.1	Non-Maternity Complications	No	No	No
32850	5	18.59	Secondary	1	1	Yes	No	No	No	No	7.8	23.7	Non-Maternity Complications	No	No	No
30111	7	23.59	Primary	1	1	Yes	No	No	No	Yes	10	22.2	Non-Maternity Complications	No	No	No
18347	5	19.13	Secondary	1	1	Yes	No	No	No	No	8	31.9	Non-Maternity Complications	No	No	No
27476	3	17.71	Secondary	2	1	Yes	No	No	No	No	8.7	34.6	Non-Maternity Complications	No	No	No
28304	3	20.03	Primary	1	1	Yes	No	No	No	Yes	10	32.5	Non-Maternity Complications	No	No	No
32129	3	21.91	Secondary	2	1	Yes	No	No	No	No	8	31.5	Non-Maternity Complications	No	No	No
29471	1	21.88	Primary	2	1	Yes	No	No	No	No	8.3	31.5	Non-Maternity Complications	No	No	No
33092	7	17.71	Primary	1	1	Yes	No	Yes	No	No	10.8	30.8	Non-Maternity Complications	No	No	No
36334	2	22.27	Secondary	2	1	Yes	No	No	No	No	11	30.7	Non-Maternity Complications	No	No	No
30056	1	17.97	Secondary	1	1	Yes	No	No	No	No	9	30.2	Maternity Complications	No	Yes	No
33321	2	16.82	Secondary	1	1	Yes	No	No	No	No	8	30.2	Non-Maternity Complications	No	No	No
31938	5	19.53	Secondary	2	1	Yes	No	No	No	No	7	29.6	Maternity Complications	No	Yes	No
33416	5	28.84	Primary	1	1	Yes	No	No	No	No	8.5	28.9	Non-Maternity Complications	No	No	No
34723	2	18.93	Primary	1	1	Yes	No	Yes	No	No	12	28	Non-Maternity Complications	No	No	No
29983	2	19.05	Secondary	1	1	Yes	No	No	No	No	10	25	Non-Maternity Complications	No	No	No
32720	4	25	Secondary	1	1	Yes	No	Yes	No	No	7.2	27.4	Non-Maternity Complications	No	No	No
30910	2	21.51	Primary	1	1	Yes	No	No	No	Yes	12	35	Non-Maternity Complications	No	No	No
33916	2	21.48	Secondary	2	1	Yes	No	No	No	No	9	35	Non-Maternity Complications	No	No	No
33463	3	20.55	Primary	1	1	Yes	No	No	No	No	7	34.4	Non-Maternity Complications	No	No	No
31616	1	24.97	Secondary	1	1	Yes	No	No	No	No	9	34	Non-Maternity Complications	No	No	No
29001	3	18.43	Primary	1	1	Yes	No	No	No	Yes	11.2	33.5	Non-Maternity Complications	No	No	No
30231	4	18.75	Primary	2	1	Yes	No	No	No	No	10.3	32.3	Non-Maternity Complications	No	No	No
29946	2	19.14	Primary	1	1	Yes	No	No	No	Yes	7.5	30.4	Non-Maternity Complications	No	No	No
35142	2	20.4	Secondary	1	1	Yes	No	No	No	No	10.4	29.9	Non-Maternity Complications	No	No	No
33481	2	17.58	Secondary	1	1	Yes	No	No	No	No	7.5	29.5	Non-Maternity Complications	No	No	No
34846	1	21.33	Primary	1	1	Yes	No	No	Yes	No	13.3	27.4	Non-Maternity Complications	No	No	No
35110	2	20.2	Primary	1	1	Yes	No	Yes	No	No	11.9	26.6	Non-Maternity Complications	No	No	No
31639	5	21.88	Primary	1	1	Yes	No	Yes	No	No	8.2	25.9	Non-Maternity Complications	No	No	No
29858	1	14.87	Secondary	1	1	Yes	No	No	No	No	8	22.6	Maternity Complications	No	Yes	No
30273	2	19.71	Primary	1	1	Yes	No	No	Yes	No	10	29.8	Non-Maternity Complications	No	No	No
33386	1	22.05	Secondary	2	1	Yes	No	No	No	No	8.5	35	Non-Maternity Complications	No	No	No
33533	1	20.96	Secondary	1	1	Yes	No	No	No	No	7.8	34.2	Non-Maternity Complications	No	No	No
38478	4	25.34	Primary	1	1	Yes	No	No	No	No	7.9	28.9	Non-Maternity Complications	No	No	No
38899	3	17.26	Primary	1	1	Yes	No	No	No	No	8.5	28.9	Non-Maternity Complications	No	No	No
20477	1	23.44	Secondary	2	1	Yes	No	No	No	No	8	27.4	Non-Maternity Complications	No	No	No
38765	3	17.78	Primary	1	1	Yes	No	No	No	No	7.8	21	Non-Maternity Complications	No	No	No
31896	2	20.57	Secondary	1	1	Yes	No	No	No	No	7.8	32.9	Non-Maternity Complications	No	No	No
29504	8	17.53	Secondary	1	1	Yes	No	No	No	No	8.9	32.4	Non-Maternity Complications	No	No	No
31883	5	20.44	Primary	1	1	Yes	No	Yes	No	No	9	31.3	Non-Maternity Complications	No	No	No
34624	2	21.8	Primary	2	1	Yes	No	No	No	Yes	10.3	31.1	Non-Maternity Complications	No	No	No
32365	1	18.67	Secondary	1	1	Yes	No	No	No	No	7.1	30.5	Maternity Complications	No	Yes	No
35992	5	21.05	Primary	1	1	Yes	No	Yes	No	No	8.6	30.1	Non-Maternity Complications	No	No	No
19459	3	22.04	Secondary	2	1	Yes	No	No	No	No	9	30	Non-Maternity Complications	No	No	No
32237	2	19.43	Primary	1	1	Yes	No	No	No	No	8.5	29	Non-Maternity Complications	No	No	No
29734	2	23.81	Primary	1	1	Yes	No	No	No	Yes	9	27.2	Non-Maternity Complications	No	No	No
33308	3	20.28	Primary	1	1	Yes	No	No	No	No	12	26.8	Non-Maternity Complications	No	No	No
30587	7	17.72	Primary	1	1	Yes	No	No	No	No	11.5	32.5	Non-Maternity Complications	No	No	No
36124	3	18.26	Primary	2	1	Yes	No	No	No	No	9	28.5	Non-Maternity Complications	No	No	No
31973	1	21.41	Secondary	1	1	Yes	No	No	No	No	7.5	27.7	Non-Maternity Complications	No	No	No
34108	6	19.92	Primary	1	1	Yes	No	No	No	No	7.5	34.1	Non-Maternity Complications	No	No	No
35728	1	24.16	Primary	1	1	Yes	No	No	No	No	9.7	32.7	Non-Maternity Complications	No	No	No
34530	2	17.71	Primary	1	1	Yes	No	No	No	No	8	30.7	Non-Maternity Complications	No	No	No
33254	5	22.04	Secondary	1	1	Yes	No	No	No	No	11	30.7	Non-Maternity Complications	No	No	No
30541	2	20.96	Primary	1	1	Yes	No	No	No	No	9.6	28.7	Non-Maternity Complications	No	No	No
37047	3	21.51	Primary	1	1	Yes	No	No	No	No	9	28.3	Non-Maternity Complications	No	No	No
37528	2	18.03	Secondary	2	1	Yes	No	Yes	No	No	7	27.7	Non-Maternity Complications	No	No	No
33632	1	21.56	Primary	1	1	Yes	No	No	No	No	7.5	27.5	Non-Maternity Complications	No	No	No
31884	2	20.31	Primary	2	1	Yes	No	No	No	No	9.6	24.2	Non-Maternity Complications	No	No	No
35026	3	18.36	Primary	1	1	Yes	No	Yes	No	No	8.4	32.1	Non-Maternity Complications	No	No	No
37425	3	26.29	Primary	1	1	Yes	No	No	No	No	9.6	27.4	Non-Maternity Complications	No	No	No
25750	3	18.9	Secondary	2	1	Yes	No	No	No	No	9.1	35	Non-Maternity Complications	No	No	No
30696	5	20.28	Secondary	1	1	Yes	No	No	No	No	8.3	30.7	Non-Maternity Complications	No	No	No
32317	3	26.49	Primary	1	1	Yes	No	Yes	No	No	8.5	30.1	Non-Maternity Complications	No	No	No
38222	1	16.94	Secondary	1	1	Yes	No	No	No	No	7.5	29.8	Non-Maternity Complications	No	No	No
34890	3	17.91	Primary	1	1	Yes	No	Yes	No	No	9	29.6	Non-Maternity Complications	No	No	No
39248	3	25.33	Primary	1	1	Yes	No	No	No	No	7	29.1	Non-Maternity Complications	No	No	No
38004	2	19.98	Primary	1	1	Yes	No	No	No	No	9	28.3	Non-Maternity Complications	No	No	No
19558	2	21.21	Secondary	2	1	Yes	No	Yes	No	No	8	27.3	Non-Maternity Complications	No	No	No
33465	1	21.45	Secondary	1	1	Yes	No	No	No	No	9.2	25.3	Non-Maternity Complications	No	No	No
38102	8	21.23	Primary	1	1	Yes	No	No	No	Yes	8	35	Non-Maternity Complications	No	No	No
28621	2	17.04	Primary	2	1	Yes	No	No	No	No	8	33.6	Non-Maternity Complications	No	No	No
35935	4	20.7	Primary	1	1	Yes	No	No	No	Yes	9.2	32.8	Non-Maternity Complications	No	No	No
31051	4	30.67	Secondary	2	1	Yes	No	No	No	No	8.5	32.6	Non-Maternity Complications	No	No	No
35347	4	20.2	Primary	1	1	Yes	No	No	No	No	8	31	Non-Maternity Complications	No	No	No
20396	3	21.97	Secondary	2	1	Yes	No	No	No	No	8.5	30.6	Non-Maternity Complications	No	No	No
32842	5	20.03	Secondary	1	1	Yes	No	No	No	No	11	30.4	Non-Maternity Complications	No	No	No
32147	2	19.2	Secondary	2	1	Yes	No	No	No	Yes	10	30.1	Non-Maternity Complications	No	No	No
29996	1	23.01	Secondary	2	1	Yes	No	No	No	No	9	30	Non-Maternity Complications	No	No	No
32035	2	18.67	Secondary	1	1	Yes	No	No	No	No	9.1	29.8	Non-Maternity Complications	No	No	No
27259	6	18.29	Primary	2	1	Yes	No	No	No	No	10	28.9	Non-Maternity Complications	No	No	No
37678	1	27.89	Secondary	1	1	Yes	No	No	No	No	13	28.2	Non-Maternity Complications	No	No	No
34228	3	18.36	Primary	1	1	Yes	No	Yes	No	No	11	28.1	Non-Maternity Complications	No	No	No
33009	3	17.63	Primary	1	1	Yes	No	No	No	No	7	27.1	Non-Maternity Complications	No	No	No
35178	2	19.83	Primary	1	1	Yes	No	No	No	No	13	26.8	Non-Maternity Complications	No	No	No
32514	4	20.72	Primary	1	1	Yes	No	No	No	No	9.8	25.8	Non-Maternity Complications	No	No	No
31285	4	21.48	Secondary	2	1	Yes	No	No	No	No	8.8	24.1	Non-Maternity Complications	No	No	No
25768	1	22.04	Secondary	2	1	Yes	No	No	No	No	9	34.5	Non-Maternity Complications	No	No	No
38205	1	17.01	Secondary	1	1	Yes	No	No	No	No	11	33.4	Non-Maternity Complications	No	No	No
30716	2	18.43	Secondary	1	1	Yes	No	No	No	No	7.7	28.9	Non-Maternity Complications	No	No	No
32427	4	21.08	Primary	1	1	Yes	No	Yes	No	No	10	28.5	Non-Maternity Complications	No	No	No
36042	3	20.7	Primary	2	1	Yes	No	Yes	No	No	8.2	26.6	Non-Maternity Complications	No	No	No
31295	5	19.15	Primary	1	1	Yes	No	No	No	No	8.7	23.8	Non-Maternity Complications	No	No	No
32737	3	19.2	Primary	1	1	Yes	No	Yes	No	No	10.4	26.3	Non-Maternity Complications	No	No	No
35691	2	21.99	Primary	1	1	Yes	No	Yes	No	No	9.2	32.3	Non-Maternity Complications	No	No	No
28530	6	28.13	Primary	2	1	Yes	No	Yes	No	No	8	31.6	Non-Maternity Complications	No	No	No
39735	1	17.22	Secondary	1	1	Yes	No	No	No	No	7	31.3	Non-Maternity Complications	No	No	No
29635	2	21.09	Primary	1	1	Yes	No	Yes	No	No	7.7	30.9	Non-Maternity Complications	No	No	No
33144	1	21.48	Secondary	1	1	Yes	No	No	No	No	10.6	30.6	Non-Maternity Complications	No	No	No
39357	4	23.92	Primary	1	1	Yes	No	No	No	No	11	30.1	Non-Maternity Complications	No	No	No
29884	2	24.61	Primary	2	1	Yes	No	No	No	No	9.6	29.7	Non-Maternity Complications	No	No	No
31061	1	18.83	Secondary	1	1	Yes	No	No	No	No	8	29.3	Non-Maternity Complications	No	No	No
37850	1	20.32	Primary	1	1	Yes	No	No	No	No	9	29	Non-Maternity Complications	No	No	No
31937	4	30.85	Secondary	1	1	Yes	No	Yes	No	No	11.4	28.8	Non-Maternity Complications	No	No	No
39850	1	22.64	Secondary	1	1	Yes	No	No	No	No	9	25.4	Non-Maternity Complications	No	No	No
30206	1	20.28	Primary	1	1	Yes	No	No	Yes	No	10	24.7	Non-Maternity Complications	No	No	No
36137	3	18.22	Primary	1	1	Yes	No	Yes	No	No	8.3	27.3	Non-Maternity Complications	No	No	No
36158	2	30.08	Primary	1	1	Yes	No	Yes	No	No	7.8	30.3	Non-Maternity Complications	No	No	No
32531	2	16.02	Secondary	1	1	Yes	No	No	No	No	8.5	30.4	Non-Maternity Complications	No	No	No
31917	3	22.31	Secondary	2	1	Yes	No	No	No	No	8.5	33.8	Non-Maternity Complications	No	No	No
30052	1	23.07	Secondary	1	1	Yes	No	No	No	No	11.7	32.4	Non-Maternity Complications	No	No	No
30166	3	17.06	Secondary	1	1	Yes	No	No	No	No	8	31.9	Non-Maternity Complications	No	No	No
29433	6	16.85	Secondary	2	1	Yes	No	No	No	No	8.5	31.8	Non-Maternity Complications	No	No	No
36217	4	20.7	Primary	1	1	Yes	No	No	No	No	8.5	31.3	Non-Maternity Complications	No	No	No
37103	4	16.18	Primary	1	1	Yes	No	No	No	No	8	29.4	Non-Maternity Complications	No	No	No
32333	1	18.18	Primary	1	1	Yes	No	No	No	No	8.3	27.4	Non-Maternity Complications	No	No	No
39087	1	22.03	Primary	1	1	Yes	No	No	Yes	No	9.5	30.7	Non-Maternity Complications	No	No	No
30560	2	26.04	Secondary	1	1	Yes	No	No	No	No	8	35	Non-Maternity Complications	No	No	No
31017	5	21.93	Secondary	1	1	Yes	No	No	No	No	12	34.7	Non-Maternity Complications	No	No	No
31047	2	22.89	Secondary	1	1	Yes	No	No	No	No	8.8	34.5	Non-Maternity Complications	No	No	No
39439	4	18.55	Secondary	1	1	Yes	No	No	No	No	9	33.2	Non-Maternity Complications	No	No	No
34786	1	20.03	Primary	1	1	Yes	No	No	No	No	12	32.4	Non-Maternity Complications	No	No	No
37292	3	20.03	Secondary	1	1	Yes	No	No	No	No	7.6	31.9	Non-Maternity Complications	No	No	No
34159	2	24.2	Secondary	2	1	Yes	No	No	No	No	8.6	31.1	Non-Maternity Complications	No	No	No
38073	1	18.83	Secondary	2	1	Yes	No	No	No	No	11	30.7	Non-Maternity Complications	No	No	No
32030	6	24.8	Primary	1	1	Yes	No	No	No	Yes	14.9	30.3	Non-Maternity Complications	No	No	No
36883	5	19.11	Primary	1	1	Yes	No	No	No	No	9	30	Non-Maternity Complications	No	No	No
33861	4	26.64	Secondary	1	1	Yes	No	No	No	Yes	8.3	29.7	Non-Maternity Complications	No	No	No
33469	6	28.44	Primary	1	1	Yes	No	No	No	No	10	27.8	Non-Maternity Complications	No	No	No
29780	4	20.57	Secondary	1	1	Yes	No	No	No	No	9.5	27.1	Non-Maternity Complications	No	No	No
30740	1	18.07	Secondary	1	1	Yes	No	No	No	No	9	26.6	Non-Maternity Complications	No	No	No
30274	4	21.78	Primary	1	1	Yes	No	No	No	No	12	28.5	Maternity Complications	No	Yes	No
31614	3	20.69	Primary	1	1	Yes	No	No	No	No	10.6	32.8	Non-Maternity Complications	No	No	No
10635	4	17.63	Secondary	2	1	Yes	No	No	No	No	12.3	32.8	Non-Maternity Complications	No	No	No
31479	1	20.32	Secondary	1	1	Yes	No	No	No	No	9	32.7	Non-Maternity Complications	No	No	No
29944	3	19.96	Primary	1	1	Yes	No	No	No	Yes	10.5	31.2	Non-Maternity Complications	No	No	No
32519	1	18.37	Primary	1	1	Yes	No	Yes	No	No	11.2	30.5	Non-Maternity Complications	No	No	No
27104	2	17.58	Secondary	2	1	Yes	No	No	Yes	No	7.3	30.5	Non-Maternity Complications	No	No	No
31500	2	19.72	Primary	1	1	Yes	No	No	No	No	9	29.6	Non-Maternity Complications	No	No	No
32438	7	27.56	Primary	1	1	Yes	No	No	No	No	10.6	25.2	Non-Maternity Complications	No	No	No
32571	1	18.59	Secondary	1	1	Yes	No	No	No	No	8	34.2	Non-Maternity Complications	No	No	No
30406	1	28.76	Secondary	1	1	Yes	No	No	No	Yes	9	33.9	Maternity Complications	No	Yes	No
34868	5	18.82	Primary	1	1	Yes	No	No	No	No	7.2	33.9	Non-Maternity Complications	No	No	No
32094	1	22.15	Secondary	1	1	Yes	No	No	No	No	7.9	33.2	Non-Maternity Complications	No	No	No
33499	8	22.48	Primary	1	1	Yes	No	No	No	Yes	10	32.9	Non-Maternity Complications	No	No	No
38181	4	20.03	Primary	1	1	Yes	No	Yes	No	No	7.5	31.6	Non-Maternity Complications	No	No	No
36160	1	22.04	Secondary	2	1	Yes	No	No	No	No	9	31.5	Non-Maternity Complications	No	No	No
36056	1	19.95	Secondary	1	1	Yes	No	No	No	No	9	30.2	Non-Maternity Complications	No	No	No
31299	2	21.88	Primary	1	1	Yes	No	No	No	No	10.8	30	Non-Maternity Complications	No	No	No
34898	3	25	Primary	1	1	Yes	No	Yes	No	No	9.8	28.4	Non-Maternity Complications	No	No	No
31109	2	16.41	Primary	2	1	Yes	No	No	No	No	16	27	Non-Maternity Complications	No	No	No
31649	1	22.86	Primary	2	1	Yes	No	No	No	Yes	9	26.5	Non-Maternity Complications	No	No	No
30521	1	18.59	Secondary	1	1	Yes	No	No	No	No	13	26.2	Non-Maternity Complications	No	No	No
37481	2	20.03	Primary	2	1	Yes	No	No	No	No	10	25.1	Non-Maternity Complications	No	No	No
32272	2	25.39	Secondary	1	1	Yes	No	No	No	No	8	23.1	Non-Maternity Complications	No	No	No
36541	3	25.53	Secondary	1	1	Yes	No	No	No	Yes	7	22.3	Non-Maternity Complications	No	No	No
32833	1	24.44	Secondary	1	1	Yes	No	No	No	Yes	9	35	Maternity Complications	No	Yes	No
33616	4	19.33	Secondary	1	1	Yes	No	No	No	No	9	31.5	Non-Maternity Complications	No	No	No
35735	5	20.8	Primary	1	1	Yes	No	No	No	No	7	29.2	Non-Maternity Complications	No	No	No
35081	2	18.29	Primary	2	1	Yes	No	Yes	No	No	10	30.8	Non-Maternity Complications	No	No	No
30831	1	26.35	Secondary	1	1	Yes	No	No	No	No	11	34.9	Non-Maternity Complications	No	No	No
32836	1	24.34	Secondary	1	1	Yes	No	Yes	No	No	10	34.8	Non-Maternity Complications	No	No	No
39764	4	21.45	Primary	1	1	Yes	No	No	No	Yes	9	28	Non-Maternity Complications	No	No	No
30420	2	20.17	Primary	1	1	Yes	No	No	No	Yes	9	27.7	Non-Maternity Complications	No	No	No
29523	3	26.3	Primary	1	1	Yes	No	Yes	No	No	11	27	Non-Maternity Complications	No	No	No
39250	3	25.39	Primary	1	1	Yes	No	No	No	Yes	9.5	26.1	Non-Maternity Complications	No	No	No
28571	2	18.82	Secondary	2	1	Yes	No	Yes	No	No	8.5	32.2	Non-Maternity Complications	No	No	No
36266	12	20.7	Secondary	1	1	Yes	No	No	No	No	11.3	32.7	Non-Maternity Complications	No	No	No
30981	1	21.48	Primary	1	1	Yes	No	Yes	No	No	10	30.7	Non-Maternity Complications	No	No	No
36655	4	23.44	Secondary	1	1	Yes	No	No	No	No	9	29.4	Non-Maternity Complications	No	No	No
30337	2	19.63	Primary	1	1	Yes	No	No	No	No	11.2	27.1	Non-Maternity Complications	No	No	No
33771	4	21.48	Primary	1	1	Yes	No	No	No	No	7	24	Non-Maternity Complications	No	No	No
29260	3	17.75	Secondary	2	1	Yes	No	Yes	No	No	9	29.1	Non-Maternity Complications	No	No	No
31436	3	24.8	Primary	1	1	Yes	No	No	No	No	9	31.6	Non-Maternity Complications	No	No	No
35511	5	18.67	Primary	1	1	Yes	No	No	No	No	9	30.6	Non-Maternity Complications	No	No	No
30784	3	22.03	Secondary	1	1	Yes	No	No	No	No	7	30	Non-Maternity Complications	No	No	No
32963	4	20.7	Primary	1	1	Yes	No	No	No	No	8.5	29.1	Non-Maternity Complications	No	No	No
35578	3	17.99	Primary	1	1	Yes	No	No	No	No	9.5	29.1	Non-Maternity Complications	No	No	No
33130	3	22.58	Primary	1	1	Yes	No	Yes	No	No	10	26.7	Non-Maternity Complications	No	No	No
29515	1	24.14	Secondary	1	1	Yes	No	No	No	No	10	26.3	Maternity Complications	No	Yes	No
30757	1	29.38	Primary	1	1	Yes	No	No	No	No	8.5	24	Non-Maternity Complications	No	No	No
32194	2	26.04	Primary	1	1	Yes	No	Yes	No	No	9.7	30.4	Non-Maternity Complications	No	No	No
26902	1	24.03	Secondary	2	1	Yes	No	No	No	No	9	27.8	Non-Maternity Complications	No	No	No
34798	3	23.51	Primary	1	1	Yes	No	Yes	No	No	10	25.1	Non-Maternity Complications	No	No	No
30286	1	20.62	Secondary	1	1	Yes	No	No	No	No	11	30.3	Non-Maternity Complications	No	No	No
37601	2	18.65	Primary	1	1	Yes	No	No	No	No	8.3	28.4	Non-Maternity Complications	No	No	No
33104	5	23.44	Primary	1	1	Yes	No	No	No	No	8	33.1	Non-Maternity Complications	No	No	No
37892	4	19.23	Secondary	1	1	Yes	No	No	No	No	11	32	Non-Maternity Complications	No	No	No
38466	3	20.81	Primary	1	1	Yes	No	No	No	No	10	30.8	Non-Maternity Complications	No	No	No
34079	1	21.48	Secondary	1	1	Yes	No	No	No	No	8.4	30.6	Non-Maternity Complications	No	No	No
38033	2	23.71	Secondary	2	1	Yes	No	No	No	No	8.2	30.1	Non-Maternity Complications	No	No	No
31323	5	19.57	Primary	1	1	Yes	No	No	No	No	9.5	26	Non-Maternity Complications	No	No	No
33452	3	31.25	Primary	1	1	Yes	No	No	No	No	11	22.9	Non-Maternity Complications	No	No	No
31191	14	21.45	Primary	1	1	Yes	No	No	No	No	10.4	30.2	Non-Maternity Complications	No	No	No
28277	1	21.16	Secondary	2	1	Yes	No	No	No	No	9	27.1	Non-Maternity Complications	No	No	No
33260	5	23.44	Primary	1	1	Yes	No	No	No	No	9.8	32.3	Non-Maternity Complications	No	No	No
30222	5	22.19	Secondary	2	1	Yes	No	No	No	Yes	8.5	31.4	Non-Maternity Complications	No	No	No
38278	3	21.41	Secondary	2	1	Yes	No	No	No	No	9.5	27.9	Non-Maternity Complications	No	No	No
32007	1	20.94	Secondary	2	1	Yes	No	No	No	No	7.6	24.1	Non-Maternity Complications	No	No	No
38450	7	18.96	Secondary	1	1	Yes	No	No	No	No	8	33	Non-Maternity Complications	No	No	No
33532	1	18.75	Secondary	1	1	Yes	No	No	No	No	9	30.5	Non-Maternity Complications	No	No	No
32618	1	20.03	Primary	1	1	Yes	No	Yes	No	No	8.6	30.8	Non-Maternity Complications	No	No	No
25982	4	25.39	Secondary	1	1	Yes	No	Yes	No	No	10.2	31.3	Non-Maternity Complications	No	No	No
19853	3	19.14	Secondary	2	1	Yes	No	Yes	No	No	10	29.7	Non-Maternity Complications	No	No	No
37836	3	23.23	Secondary	1	1	Yes	No	Yes	No	No	8	33.1	Non-Maternity Complications	No	No	No
30809	4	18.69	Primary	2	1	Yes	No	Yes	No	No	8	28.4	Non-Maternity Complications	No	No	No
32634	3	18.37	Primary	1	1	Yes	No	Yes	No	No	8	28	Non-Maternity Complications	No	No	No
33281	1	22.89	Secondary	1	1	Yes	No	No	No	No	7.5	31.5	Non-Maternity Complications	No	No	No
32887	3	21.07	Primary	1	1	Yes	No	No	No	No	7	30	Non-Maternity Complications	No	No	No
35911	2	26.37	Secondary	2	1	Yes	No	No	No	No	9.1	35	Non-Maternity Complications	No	No	No
33207	5	29.3	Secondary	1	1	Yes	No	No	No	No	10	25.8	Non-Maternity Complications	No	No	No
38674	3	21.45	Primary	2	1	Yes	No	No	No	No	10	27.4	Maternity Complications	No	Yes	No
35877	5	23.88	Secondary	1	1	Yes	No	No	No	No	8.5	35	Non-Maternity Complications	No	No	No
28167	5	20.81	Primary	1	1	Yes	No	Yes	No	No	11.3	28.1	Maternity Complications	Yes	Yes	No
37193	4	19.98	Primary	1	1	Yes	No	No	No	Yes	8	30.4	Maternity Complications	Yes	No	No
28283	3	19.43	Primary	2	1	Yes	No	No	Yes	No	10.5	29	Maternity Complications	Yes	No	No
37570	3	21.33	Secondary	1	1	Yes	No	No	No	No	9	28.3	Maternity Complications	Yes	No	No
29262	6	25.28	Primary	2	1	Yes	No	Yes	No	No	8.8	31.7	Maternity Complications	Yes	No	No
27178	3	21.79	Secondary	2	1	Yes	No	No	No	No	11	31.4	Maternity Complications	Yes	No	No
25857	2	17.48	Secondary	1	1	Yes	No	No	No	No	9.7	34.5	Maternity Complications	No	No	Yes
34268	2	23.5	Primary	1	1	Yes	No	No	No	No	7.5	35	Maternity Complications	No	No	Yes
34372	2	20.34	Primary	1	1	Yes	No	No	No	Yes	8	35	Maternity Complications	No	No	Yes
31977	16	24.56	Primary	1	1	Yes	No	Yes	No	No	9.2	35	Maternity Complications	No	No	Yes
35856	2	20.34	Secondary	1	1	Yes	No	No	No	No	8.5	35	Maternity Complications	No	No	Yes
37905	2	19.98	Secondary	1	1	Yes	No	No	No	No	9	35	Maternity Complications	No	No	Yes
33487	5	20.13	Secondary	1	1	Yes	No	No	No	No	7	35	Maternity Complications	No	No	Yes
37378	2	24.84	Secondary	1	1	Yes	No	No	No	No	8	35	Maternity Complications	No	No	Yes
33655	2	19.61	Secondary	2	1	Yes	No	No	No	No	7.5	35	Maternity Complications	No	No	Yes
28597	7	27.97	Primary	1	1	Yes	No	Yes	No	No	9.1	35	Maternity Complications	No	No	Yes
37286	2	25.33	Primary	1	1	Yes	No	No	No	No	12.2	34.9	Maternity Complications	No	No	Yes
29492	1	21.22	Secondary	2	1	Yes	No	Yes	No	No	8.5	34.9	Maternity Complications	No	No	Yes
33807	2	22.96	Secondary	1	1	Yes	No	Yes	No	No	11.3	34.8	Maternity Complications	No	No	Yes
29045	4	29	Secondary	2	1	Yes	No	Yes	No	No	11.6	34.8	Maternity Complications	No	No	Yes
35803	5	24.84	Secondary	1	1	Yes	No	Yes	No	No	8.5	34.5	Maternity Complications	No	No	Yes
30172	3	22.03	Primary	1	1	Yes	No	No	No	No	9.3	34.4	Maternity Complications	No	No	Yes
32089	2	20.31	Primary	2	1	Yes	No	Yes	No	No	14	34.4	Maternity Complications	No	No	Yes
36559	14	27.06	Primary	2	1	Yes	No	No	No	No	7	34.4	Maternity Complications	No	No	Yes
31042	2	18.59	Primary	1	1	Yes	No	No	No	No	8.6	34.2	Maternity Complications	No	No	Yes
25941	2	22.22	Secondary	2	1	Yes	No	No	No	No	8.5	34.1	Maternity Complications	No	No	Yes
37961	7	21.3	Secondary	2	1	Yes	No	No	Yes	No	12	34	Maternity Complications	No	No	Yes
30469	8	23.59	Secondary	1	1	Yes	No	No	No	No	12	33.9	Maternity Complications	No	No	Yes
33150	2	20.61	Secondary	1	1	Yes	No	No	No	No	10	33.8	Maternity Complications	No	No	Yes
28423	7	22.89	Secondary	2	1	Yes	No	No	No	No	9.7	33.7	Maternity Complications	No	No	Yes
27618	10	20.57	Secondary	2	1	Yes	No	No	No	No	8.5	33.7	Maternity Complications	No	No	Yes
30744	2	20.42	Secondary	1	1	Yes	No	Yes	No	No	7	33.7	Maternity Complications	No	No	Yes
32492	1	20.83	Primary	1	1	Yes	No	No	No	No	8.3	33.6	Maternity Complications	No	No	Yes
38632	10	24.03	Secondary	1	1	Yes	No	No	No	Yes	12	33.6	Maternity Complications	No	No	Yes
31740	2	25.1	Secondary	2	1	Yes	No	Yes	No	No	12	33.3	Maternity Complications	No	No	Yes
32828	7	21.33	Primary	1	1	Yes	No	No	No	No	9	33.1	Maternity Complications	No	No	Yes
34963	8	25.97	Secondary	1	1	Yes	No	Yes	No	No	7.7	33	Maternity Complications	No	No	Yes
30354	6	23.05	Primary	1	1	Yes	No	No	No	No	9.8	33	Maternity Complications	No	No	Yes
35982	4	27.55	Secondary	1	1	Yes	No	No	No	No	10	32.8	Maternity Complications	No	No	Yes
32307	3	23.63	Secondary	1	1	Yes	No	No	No	No	11	32.8	Maternity Complications	No	No	Yes
21385	4	18.36	Primary	2	1	Yes	No	No	No	No	7.2	32.7	Maternity Complications	No	No	Yes
34336	3	19.07	Secondary	2	1	Yes	No	No	No	No	9.4	32.7	Maternity Complications	No	No	Yes
30726	7	23.42	Secondary	1	1	Yes	No	No	No	No	9.3	32.5	Maternity Complications	No	No	Yes
32929	8	23.18	Secondary	1	1	Yes	No	No	No	No	9	32.5	Maternity Complications	No	No	Yes
37884	5	19.4	Secondary	1	1	Yes	No	No	No	No	9	32.4	Maternity Complications	No	No	Yes
21468	7	22.86	Primary	2	1	Yes	No	No	No	No	9.2	32.3	Maternity Complications	No	No	Yes
31414	8	20.4	Secondary	1	1	Yes	No	No	No	No	9.3	32.2	Maternity Complications	No	No	Yes
32059	2	21.1	Secondary	1	1	Yes	No	No	No	No	7	32.2	Maternity Complications	No	No	Yes
33402	3	20.44	Secondary	1	1	Yes	No	No	No	No	8	32.1	Maternity Complications	No	No	Yes
30616	5	25.22	Secondary	2	1	Yes	No	Yes	No	No	10	32.1	Maternity Complications	No	No	Yes
24581	2	21.5	Secondary	2	1	Yes	No	No	No	No	11	32	Maternity Complications	No	No	Yes
30732	3	22.6	Primary	1	1	Yes	No	No	No	No	9	32	Maternity Complications	No	No	Yes
33847	1	23.62	Secondary	1	1	Yes	No	Yes	No	No	8	32	Maternity Complications	No	No	Yes
30663	4	28.89	Secondary	1	1	Yes	No	No	No	No	8	32	Maternity Complications	No	No	Yes
23269	6	21.09	Secondary	1	1	Yes	No	No	No	No	9	31.9	Maternity Complications	No	No	Yes
32907	5	23.62	Primary	1	1	Yes	No	No	No	No	11	31.8	Maternity Complications	No	No	Yes
33277	2	23.23	Secondary	1	1	Yes	No	No	No	No	8.5	31.8	Maternity Complications	No	No	Yes
34649	3	22.03	Primary	1	1	Yes	No	No	No	No	7	31.8	Maternity Complications	No	No	Yes
36453	3	16.02	Secondary	1	1	Yes	No	No	No	No	10	31.6	Maternity Complications	No	No	Yes
19521	1	20.81	Secondary	2	1	Yes	No	No	No	No	10.6	31.6	Maternity Complications	No	No	Yes
32136	10	26.37	Primary	1	1	Yes	No	Yes	No	No	9	31.5	Maternity Complications	No	No	Yes
26438	1	17.44	Secondary	2	1	Yes	No	No	No	No	7.5	31.4	Maternity Complications	No	No	Yes
33477	1	17.97	Primary	1	1	Yes	No	No	Yes	No	10.5	31.4	Maternity Complications	No	No	Yes
38636	3	19.14	Primary	1	1	Yes	No	No	No	Yes	10.6	31.4	Maternity Complications	No	No	Yes
35234	5	26.04	Primary	2	1	Yes	No	Yes	No	No	11.5	31.3	Maternity Complications	No	No	Yes
32130	4	32.87	Secondary	1	1	Yes	No	No	No	No	11.6	31.3	Maternity Complications	No	No	Yes
33342	1	22.68	Secondary	1	1	Yes	No	No	No	No	8	31.3	Maternity Complications	No	No	Yes
38735	6	16.61	Primary	2	1	Yes	No	No	No	No	9	31.2	Maternity Complications	No	No	Yes
35564	1	26.04	Secondary	1	1	Yes	No	No	No	No	7	31.1	Maternity Complications	No	No	Yes
30409	1	20.96	Primary	2	1	Yes	No	No	No	No	8.8	31.1	Maternity Complications	No	No	Yes
33546	4	18.36	Primary	1	1	Yes	No	Yes	No	No	11.4	31	Maternity Complications	No	No	Yes
33360	2	23.63	Secondary	1	1	Yes	No	No	No	No	7.5	31	Maternity Complications	No	No	Yes
32662	1	24.61	Secondary	2	1	Yes	No	No	No	No	8	31	Maternity Complications	No	No	Yes
38868	2	16.41	Primary	1	1	Yes	No	No	No	No	12.7	31	Maternity Complications	No	No	Yes
38615	2	18.82	Primary	2	1	Yes	No	No	No	Yes	8	30.8	Maternity Complications	No	No	Yes
37663	5	22.03	Primary	1	1	Yes	No	No	No	No	9	30.6	Maternity Complications	No	No	Yes
29992	1	20.32	Secondary	1	1	Yes	No	No	No	No	9	30.5	Maternity Complications	No	No	Yes
32323	3	22.03	Primary	1	1	Yes	No	No	No	No	10.9	30.5	Maternity Complications	No	No	Yes
30368	5	22.89	Secondary	2	1	Yes	No	No	No	No	10	30.4	Maternity Complications	No	No	Yes
32646	4	23.44	Primary	1	1	Yes	No	No	No	No	9.5	30.4	Maternity Complications	No	No	Yes
28646	2	19.23	Primary	1	1	Yes	No	No	No	Yes	8	30.4	Maternity Complications	No	No	Yes
35283	5	18.73	Primary	1	1	Yes	No	No	No	No	8	30.3	Maternity Complications	No	No	Yes
35516	2	19.91	Primary	1	1	Yes	No	No	No	No	8.7	30.1	Maternity Complications	No	No	Yes
32920	4	19.53	Primary	1	1	Yes	No	Yes	No	No	9	30	Maternity Complications	No	No	Yes
31506	1	20.03	Primary	2	1	Yes	No	Yes	No	No	8.8	29.9	Maternity Complications	No	No	Yes
39418	2	20.44	Primary	1	1	Yes	No	No	No	No	9	29.8	Maternity Complications	No	No	Yes
33334	2	21.88	Primary	1	1	Yes	No	No	No	No	8	29.7	Maternity Complications	No	No	Yes
26022	1	16.82	Secondary	2	1	Yes	No	No	No	Yes	7.5	29.6	Maternity Complications	No	No	Yes
30791	4	24.97	Secondary	1	1	Yes	No	Yes	No	No	10.3	29.6	Maternity Complications	No	No	Yes
32058	3	28.04	Secondary	2	1	Yes	No	Yes	No	No	8	29.5	Maternity Complications	No	No	Yes
37548	5	21.63	Primary	2	1	Yes	No	No	No	No	11.6	29.4	Maternity Complications	No	No	Yes
31750	5	24.17	Primary	1	1	Yes	No	Yes	No	No	8	29.4	Maternity Complications	No	No	Yes
26858	3	17.4	Secondary	2	1	Yes	No	No	No	Yes	9	29.3	Maternity Complications	No	No	Yes
36412	6	26.67	Primary	2	1	Yes	No	No	No	No	11.8	28.9	Maternity Complications	No	No	Yes
31123	1	25.48	Secondary	1	1	Yes	No	No	No	Yes	9.6	28.7	Maternity Complications	No	No	Yes
36800	3	23.83	Primary	1	1	Yes	No	Yes	No	No	12.3	28.7	Maternity Complications	No	No	Yes
33540	5	22.83	Primary	1	1	Yes	No	No	No	No	9	28.5	Maternity Complications	No	No	Yes
30570	2	21.19	Primary	2	1	Yes	No	Yes	No	No	8	28.1	Maternity Complications	No	No	Yes
34709	2	22.68	Primary	2	1	Yes	No	No	No	No	9.1	28	Maternity Complications	No	No	Yes
32926	10	24.44	Primary	2	1	Yes	No	No	No	No	10	28	Maternity Complications	No	No	Yes
33408	1	22.43	Secondary	2	1	Yes	No	No	No	Yes	8.2	27.9	Maternity Complications	No	No	Yes
33677	5	28.3	Secondary	1	1	Yes	No	No	No	No	9.8	27.8	Maternity Complications	No	No	Yes
36271	1	20.43	Primary	1	1	Yes	No	No	No	No	14.5	27.7	Maternity Complications	No	No	Yes
31207	1	21.5	Secondary	2	1	Yes	No	Yes	No	No	10.2	27.7	Maternity Complications	No	No	Yes
31028	2	26.84	Primary	1	1	Yes	No	Yes	No	No	8	27.6	Maternity Complications	No	No	Yes
24838	2	21.33	Primary	1	1	Yes	No	No	No	No	11	27.6	Maternity Complications	No	No	Yes
35708	4	18.82	Secondary	2	1	Yes	No	Yes	No	No	8.3	27.6	Maternity Complications	No	No	Yes
33485	3	23.23	Secondary	1	1	Yes	No	No	No	No	10	27.5	Maternity Complications	No	No	Yes
29320	3	21.77	Secondary	2	1	Yes	No	Yes	No	No	10	27.5	Maternity Complications	No	No	Yes
33703	2	26.35	Primary	1	1	Yes	No	No	No	No	8	27.4	Maternity Complications	No	No	Yes
29709	5	20.43	Secondary	1	1	Yes	No	No	No	No	11	27.2	Maternity Complications	No	No	Yes
32117	3	24.46	Primary	1	1	Yes	No	No	No	Yes	7.8	27	Maternity Complications	No	No	Yes
36688	11	30.08	Secondary	2	1	Yes	No	Yes	No	No	11	26.9	Maternity Complications	No	No	Yes
33298	1	18.29	Primary	1	1	Yes	No	No	No	No	10.5	26.7	Maternity Complications	No	No	Yes
33213	3	23.5	Primary	1	1	Yes	No	No	No	No	10.3	26.7	Maternity Complications	No	No	Yes
30905	2	23.05	Primary	2	1	Yes	No	No	No	Yes	11.7	26.3	Maternity Complications	No	No	Yes
37223	3	23.63	Primary	1	1	Yes	No	No	No	No	10	26.1	Maternity Complications	No	No	Yes
33622	7	24.56	Secondary	1	1	Yes	No	No	No	No	7.5	26.1	Maternity Complications	No	No	Yes
28917	2	18.73	Primary	1	1	Yes	No	Yes	No	No	11.7	26	Maternity Complications	No	No	Yes
35789	1	23.44	Primary	1	1	Yes	No	No	No	Yes	9	26	Maternity Complications	No	No	Yes
32873	4	21.78	Primary	1	1	Yes	No	No	No	Yes	13.4	25.7	Maternity Complications	No	No	Yes
37351	5	30.86	Secondary	2	1	Yes	No	Yes	No	No	10.8	25.5	Maternity Complications	No	No	Yes
32711	1	18.49	Primary	2	1	Yes	No	No	No	No	8	25.3	Maternity Complications	No	No	Yes
35474	3	21.09	Secondary	2	1	Yes	No	No	No	No	8.9	25.3	Maternity Complications	No	No	Yes
37916	2	27.01	Primary	1	1	Yes	No	No	No	No	8.5	25.3	Maternity Complications	No	No	Yes
31705	2	18.29	Primary	1	1	Yes	No	No	No	No	9.4	25.1	Maternity Complications	No	No	Yes
31016	7	21.08	Primary	1	1	Yes	No	No	No	No	9.2	25	Maternity Complications	No	No	Yes
32883	4	21.81	Secondary	1	1	Yes	No	No	No	No	14	25	Maternity Complications	No	No	Yes
32900	5	26.67	Primary	1	1	Yes	No	No	No	No	7	24.9	Maternity Complications	No	No	Yes
35358	1	19.92	Secondary	1	1	Yes	No	No	No	Yes	10.1	24.8	Maternity Complications	No	No	Yes
36190	2	20.96	Primary	1	1	Yes	No	No	No	No	9.4	24.8	Maternity Complications	No	No	Yes
39972	1	19.38	Primary	1	1	Yes	No	No	No	Yes	8	24.5	Maternity Complications	No	No	Yes
36731	3	17.01	Secondary	1	1	Yes	No	Yes	No	No	9	24.5	Maternity Complications	No	No	Yes
33955	4	19.56	Secondary	1	1	Yes	No	No	No	No	10	24.3	Maternity Complications	No	No	Yes
33383	2	25.81	Secondary	1	1	Yes	No	No	No	No	12.5	24.3	Maternity Complications	No	No	Yes
33577	4	16.85	Primary	1	1	Yes	No	No	No	No	10.7	23.9	Maternity Complications	No	No	Yes
36983	3	19.56	Secondary	1	1	Yes	No	No	No	No	10	23.9	Maternity Complications	No	No	Yes
32276	1	17.91	Secondary	2	1	Yes	No	No	No	No	7	23.6	Maternity Complications	No	No	Yes
32582	3	16.89	Primary	1	1	Yes	No	No	No	No	8.4	22.8	Maternity Complications	No	No	Yes
28515	3	20	Secondary	2	1	Yes	No	No	No	No	7.5	22.2	Maternity Complications	No	No	Yes
36389	1	20.03	Secondary	1	2	Yes	Yes	No	No	No	12	35	Maternity Complications	Yes	No	No
32912	5	19.2	Secondary	2	2	Yes	Yes	No	No	No	9	35	Maternity Complications	Yes	No	No
26389	4	21.64	Secondary	2	2	Yes	Yes	No	No	No	8	35	Non-Maternity Complications	No	No	No
29297	2	22.22	Primary	2	2	Yes	Yes	No	No	No	8.5	35	Non-Maternity Complications	No	No	No
34073	1	17.9	Secondary	2	2	Yes	Yes	No	No	No	8	35	Maternity Complications	Yes	No	No
27738	4	21.1	Secondary	1	2	Yes	Yes	No	No	No	8.2	35	Maternity Complications	No	No	Yes
8433	2	24.65	Secondary	2	2	Yes	Yes	Yes	No	No	9	35	Maternity Complications	No	No	Yes
30855	1	19.83	Primary	2	2	Yes	Yes	No	No	No	8.5	35	Non-Maternity Complications	No	No	No
34542	4	19.68	Secondary	1	2	Yes	Yes	No	No	No	10	35	Non-Maternity Complications	No	No	No
35275	1	25.4	Primary	1	2	Yes	Yes	No	No	No	10.2	35	Maternity Complications	Yes	No	No
37151	2	17.69	Secondary	2	2	Yes	Yes	No	No	No	9	35	Non-Maternity Complications	No	No	No
39549	4	20.7	Secondary	2	2	Yes	Yes	No	No	No	8.5	35	Non-Maternity Complications	No	No	No
33296	9	29.33	Primary	2	2	Yes	Yes	No	No	No	8	35	Non-Maternity Complications	No	No	No
39067	1	27.64	Secondary	1	2	Yes	Yes	No	No	No	8.5	35	Non-Maternity Complications	No	No	No
37813	2	21.09	Primary	2	2	Yes	Yes	No	No	No	8.4	35	Non-Maternity Complications	No	No	No
34142	7	23.92	Primary	1	2	Yes	Yes	No	No	No	13	35	Maternity Complications	No	No	Yes
32228	1	20.2	Secondary	2	2	Yes	Yes	No	No	No	8.4	35	Maternity Complications	Yes	No	No
32937	5	19.53	Secondary	2	2	Yes	Yes	No	No	No	8	35	Maternity Complications	Yes	No	No
34582	1	25.22	Secondary	2	2	Yes	Yes	No	No	No	7	35	Non-Maternity Complications	No	No	No
37286	2	25.33	Primary	2	2	Yes	Yes	No	No	No	8.5	35	Maternity Complications	No	No	Yes
33613	6	22.21	Secondary	1	2	Yes	Yes	Yes	No	No	7.5	34.9	Maternity Complications	No	No	Yes
38021	1	24.56	Secondary	1	2	Yes	Yes	Yes	No	No	9.8	34.8	Maternity Complications	Yes	No	No
33608	7	20	Secondary	2	2	Yes	Yes	No	No	No	9.5	34.7	Maternity Complications	Yes	No	No
39361	1	24.84	Secondary	1	2	Yes	Yes	No	No	Yes	9	34.7	Maternity Complications	Yes	No	No
39444	5	21.56	Secondary	1	2	Yes	Yes	No	No	No	7.5	34.6	Non-Maternity Complications	No	No	No
34321	1	21.64	Secondary	2	2	Yes	Yes	No	No	No	7.5	34.6	Maternity Complications	Yes	No	No
36296	3	21.72	Primary	1	2	Yes	Yes	No	No	No	9	34.5	Maternity Complications	Yes	No	No
34765	4	19.07	Secondary	2	2	Yes	Yes	No	No	No	7	34.4	Non-Maternity Complications	No	No	No
33935	7	23.53	Secondary	2	2	Yes	Yes	No	No	No	12	34.4	Maternity Complications	No	No	Yes
32594	3	20.03	Secondary	2	2	Yes	Yes	No	No	No	10.4	34.3	Non-Maternity Complications	No	No	No
29836	6	23.11	Secondary	1	2	Yes	Yes	Yes	No	No	7.9	34.3	Maternity Complications	No	No	Yes
35742	1	25.53	Secondary	2	2	Yes	Yes	No	No	No	10	34.2	Maternity Complications	No	No	Yes
35048	1	21.76	Secondary	1	2	Yes	Yes	No	No	No	8.5	34.2	Maternity Complications	No	No	Yes
23744	2	21.6	Secondary	2	2	Yes	Yes	No	No	No	9	34.2	Maternity Complications	No	No	Yes
37519	2	22.83	Primary	2	2	Yes	Yes	No	No	No	9.7	34.1	Non-Maternity Complications	No	No	No
33980	1	19.81	Secondary	2	2	Yes	Yes	No	No	No	13	34.1	Non-Maternity Complications	No	No	No
37316	2	22.21	Secondary	2	2	Yes	Yes	No	No	No	8.4	34	Maternity Complications	Yes	No	No
31862	7	19.92	Primary	2	2	Yes	Yes	No	No	No	10.2	34	Non-Maternity Complications	No	No	No
35006	4	24.77	Primary	2	2	Yes	Yes	No	No	No	9	33.9	Maternity Complications	Yes	No	No
16082	3	24.22	Secondary	2	2	Yes	Yes	Yes	No	No	13.5	33.9	Non-Maternity Complications	No	No	No
31522	9	28.84	Secondary	2	2	Yes	Yes	No	No	No	8	33.9	Maternity Complications	No	No	Yes
35138	7	18.29	Primary	2	2	Yes	Yes	No	No	No	10	33.9	Maternity Complications	No	No	Yes
18581	7	18.65	Primary	2	2	Yes	Yes	No	No	No	9	33.9	Maternity Complications	No	No	Yes
34981	1	20.83	Secondary	2	2	Yes	Yes	No	No	Yes	8.6	33.8	Maternity Complications	Yes	No	No
37128	2	21.23	Secondary	2	2	Yes	Yes	No	No	No	8	33.8	Maternity Complications	Yes	No	No
33624	7	27.06	Secondary	2	2	Yes	Yes	No	No	No	9.2	33.8	Non-Maternity Complications	No	No	No
38158	3	22.83	Primary	1	2	Yes	Yes	Yes	No	No	8.5	33.8	Maternity Complications	Yes	No	Yes
35801	2	18.83	Secondary	1	2	Yes	Yes	No	No	No	9	33.7	Maternity Complications	Yes	No	Yes
18942	1	20.7	Secondary	2	2	Yes	Yes	No	No	No	9.4	33.6	Non-Maternity Complications	No	No	No
32764	2	19.53	Primary	2	2	Yes	Yes	No	No	No	7	33.6	Non-Maternity Complications	No	No	No
35469	5	22.27	Secondary	2	2	Yes	Yes	No	No	No	8	33.6	Non-Maternity Complications	No	No	No
36545	6	20.43	Secondary	2	2	Yes	Yes	No	No	No	8	33.6	Non-Maternity Complications	No	No	No
34306	1	20.96	Primary	1	2	Yes	Yes	No	Yes	No	9	33.6	Maternity Complications	No	No	Yes
38758	2	19.05	Primary	2	2	Yes	Yes	No	No	No	11.4	33.6	Maternity Complications	No	No	Yes
18244	7	18.66	Secondary	2	2	Yes	Yes	No	No	No	10.3	33.5	Maternity Complications	Yes	No	No
33666	3	18.31	Primary	2	2	Yes	Yes	No	No	No	9	33.5	Non-Maternity Complications	No	No	No
21800	4	18.91	Secondary	2	2	Yes	Yes	No	Yes	No	12	33.4	Maternity Complications	Yes	No	No
29843	6	22.03	Secondary	2	2	Yes	Yes	No	No	No	8.5	33.4	Maternity Complications	Yes	No	No
31902	2	17.36	Secondary	2	2	Yes	Yes	No	No	No	7	33.3	Non-Maternity Complications	No	No	No
32307	3	23.63	Secondary	2	2	Yes	Yes	No	No	No	9	33.3	Maternity Complications	Yes	No	No
30377	1	15.63	Primary	2	2	Yes	Yes	No	No	No	9	33.3	Maternity Complications	No	No	Yes
35212	1	21.67	Primary	2	2	Yes	Yes	No	Yes	No	9.5	33.2	Non-Maternity Complications	No	No	No
37135	7	29.24	Secondary	1	2	Yes	Yes	Yes	No	No	7.8	33.1	Maternity Complications	Yes	No	No
38475	5	23.88	Primary	1	2	Yes	Yes	No	No	Yes	9	33.1	Maternity Complications	No	No	Yes
38964	3	22.6	Primary	1	2	Yes	Yes	No	No	No	9.5	33.1	Maternity Complications	Yes	No	Yes
31856	6	24.84	Secondary	2	2	Yes	Yes	No	No	No	9.9	33.1	Maternity Complications	No	No	Yes
34062	3	18.03	Primary	2	2	Yes	Yes	No	No	No	9	33	Non-Maternity Complications	No	No	No
37800	4	19.3	Primary	1	2	Yes	Yes	Yes	No	No	9	33	Non-Maternity Complications	No	No	No
35003	1	22.86	Primary	2	2	Yes	Yes	No	No	No	8.2	33	Maternity Complications	No	No	Yes
34772	2	22.83	Secondary	2	2	Yes	Yes	No	No	No	7.5	32.9	Maternity Complications	Yes	No	No
39441	3	28.35	Secondary	2	2	Yes	Yes	No	No	No	10	32.9	Maternity Complications	Yes	Yes	No
35687	2	23.12	Primary	2	2	Yes	Yes	No	No	No	9	32.8	Maternity Complications	Yes	No	No
30627	1	25.65	Secondary	2	2	Yes	Yes	No	No	No	10	32.8	Non-Maternity Complications	No	No	No
22278	1	19.33	Secondary	2	2	Yes	Yes	No	No	No	8	32.8	Non-Maternity Complications	No	No	No
33851	2	19.81	Primary	1	2	Yes	Yes	No	No	No	9	32.8	Non-Maternity Complications	No	No	No
28991	6	21.72	Primary	2	2	Yes	Yes	Yes	No	No	8.2	32.7	Maternity Complications	No	No	Yes
31410	5	19.53	Secondary	2	2	Yes	Yes	No	No	No	9.5	32.7	Maternity Complications	No	No	Yes
34167	2	18.83	Secondary	2	2	Yes	Yes	No	No	No	11	32.7	Maternity Complications	No	No	Yes
39401	1	22.77	Secondary	1	2	Yes	Yes	No	No	Yes	9	32.6	Maternity Complications	Yes	No	No
25881	3	24.03	Secondary	2	2	Yes	Yes	No	No	No	7.4	32.6	Non-Maternity Complications	No	No	No
24683	3	21.1	Secondary	2	2	Yes	Yes	No	No	No	10	32.6	Non-Maternity Complications	No	No	No
34649	3	22.02	Secondary	2	2	Yes	Yes	No	No	No	7.8	32.6	Maternity Complications	No	No	Yes
32648	9	23.11	Primary	2	2	Yes	Yes	No	No	No	9	32.5	Maternity Complications	Yes	No	No
31586	2	18.9	Secondary	1	2	Yes	Yes	No	No	No	10	32.5	Non-Maternity Complications	No	No	No
36098	1	24.46	Secondary	1	2	Yes	Yes	No	No	No	10	32.5	Maternity Complications	No	No	Yes
37156	3	21.37	Secondary	1	2	Yes	Yes	No	No	No	8.6	32.4	Maternity Complications	Yes	No	No
30966	7	23.44	Secondary	2	2	Yes	Yes	Yes	No	No	8.5	32.4	Maternity Complications	Yes	No	Yes
34763	9	22.83	Secondary	1	2	Yes	Yes	No	No	No	11	32.3	Non-Maternity Complications	No	No	No
32991	5	20.7	Secondary	2	2	Yes	Yes	No	No	No	8.5	32.3	Maternity Complications	Yes	No	No
31858	4	23.11	Primary	1	2	Yes	Yes	No	No	No	8.2	32.3	Non-Maternity Complications	No	No	No
32136	10	26.37	Secondary	2	2	Yes	Yes	Yes	No	No	11	32.3	Maternity Complications	No	No	Yes
31002	3	18.44	Secondary	2	2	Yes	Yes	No	No	No	8.4	32.2	Maternity Complications	Yes	No	No
37183	1	19.56	Secondary	2	2	Yes	Yes	No	No	No	9	32.2	Maternity Complications	No	Yes	No
36434	2	21.45	Primary	1	2	Yes	Yes	No	No	No	9.6	32.2	Maternity Complications	Yes	No	No
37878	5	20.83	Secondary	2	2	Yes	Yes	No	No	No	11	32.2	Maternity Complications	Yes	No	No
29346	2	21.1	Secondary	1	2	Yes	Yes	No	No	No	8.1	32.2	Maternity Complications	Yes	No	No
32082	3	18.75	Primary	1	2	Yes	Yes	No	No	No	9	32.1	Non-Maternity Complications	No	No	No
39258	4	20.81	Primary	2	2	Yes	Yes	No	No	No	10	32.1	Non-Maternity Complications	No	No	No
33087	2	18.07	Secondary	2	2	Yes	Yes	No	No	No	8	32.1	Non-Maternity Complications	No	No	No
34784	5	19.25	Primary	2	2	Yes	Yes	No	No	No	10	32.1	Maternity Complications	Yes	No	No
31429	1	16.8	Secondary	1	2	Yes	Yes	No	No	No	7	32.1	Non-Maternity Complications	No	No	No
23269	5	21.09	Secondary	2	2	Yes	Yes	No	No	No	7.2	32	Non-Maternity Complications	No	No	No
25471	8	20.13	Secondary	2	2	Yes	Yes	No	No	No	9.5	32	Non-Maternity Complications	No	No	No
33277	2	23.23	Secondary	2	2	Yes	Yes	No	No	No	8.5	32	Maternity Complications	No	No	Yes
39878	4	18.03	Secondary	1	2	Yes	Yes	No	No	Yes	8.4	31.9	Maternity Complications	Yes	No	No
24604	3	23.05	Primary	2	2	Yes	Yes	No	No	No	10.6	31.9	Maternity Complications	Yes	Yes	No
38306	4	17.63	Primary	2	2	Yes	Yes	Yes	No	No	8.5	31.8	Non-Maternity Complications	No	No	No
30987	1	21.48	Secondary	2	2	Yes	Yes	No	No	No	8	31.8	Maternity Complications	Yes	No	No
30258	4	22.04	Secondary	2	2	Yes	Yes	No	No	No	9.1	31.7	Maternity Complications	Yes	No	No
33123	7	26.95	Primary	2	2	Yes	Yes	No	No	No	12	31.7	Maternity Complications	Yes	No	No
37057	2	27.55	Secondary	2	2	Yes	Yes	No	No	No	7	31.7	Non-Maternity Complications	No	No	No
38519	1	19.63	Secondary	2	2	Yes	Yes	No	No	No	8.9	31.7	Non-Maternity Complications	No	No	No
21825	3	21.78	Secondary	2	2	Yes	Yes	No	No	No	9	31.7	Maternity Complications	No	No	Yes
35685	2	26.35	Primary	2	2	Yes	Yes	No	No	No	9	31.6	Non-Maternity Complications	No	No	No
37082	1	19.43	Primary	2	2	Yes	Yes	No	No	No	11	31.6	Non-Maternity Complications	No	No	No
[truncated: 732 more rows]
